# Supplementary material
Source: PubMed Central journal article supplement (PMC3677520)
Supplement: NIHMS449507-supplement-1_si_001.pdf [file NIHMS449507-supplement-1_si_001.pdf]

# Thiolates Chemically Induce Redox Activation of BTZ043 and Related Potent Nitro Aromatic Anti-Tuberculosis Agents

Rohit Tiwari, Garrett C. Moraski, Viktor Krchňák, Patricia A. Miller, Mariangelli Colon-Martinez, Eliza Herrero, Allen G. Oliver and Marvin J. Miller\*

<sup>†</sup>Department of Chemistry and Biochemistry, University of Notre Dame, Notre Dame, Indiana 46556

| Contents                                                                                                                                                                                                    | Page No. |
|-------------------------------------------------------------------------------------------------------------------------------------------------------------------------------------------------------------|----------|
| 1) General Experimental Section                                                                                                                                                                             | S2-S11   |
| 2) Mulliken atomic charges calculated by AM1 method for <b>3</b>                                                                                                                                            | S12      |
| 3) Mulliken atomic charges calculated by AM1 method for compound <b>11</b>                                                                                                                                  | S13      |
| 4) Scheme S1: Classical nucleophilic aromatic substitution at nitroaromatic compounds such as 2,4-dinitrofluorobenzene (Sangers reagent) and 2,4-dinitrobenzenesulfonamide with thiols                      | S14      |
| 5) Scheme S2: Reaction of <b>11</b> with dimedone and NBD-Cl (synthesis of compound <b>41</b> )                                                                                                             | S15      |
| 6) Scheme S3: Possible reactions of enzyme thiolates (active site cysteine) with BTZ043 ( <b>3</b> ) to initiate enzyme inactivating process via formation of the sulfenic acid intermediate                | S16      |
| 7) General procedure of N-O trapping experiment (Scheme S4: synthesis of <b>40</b> )                                                                                                                        | S17      |
| 8) Scheme S5: Syntheses of compounds <b>39</b> and <b>42</b>                                                                                                                                                | S18      |
| 9) Scheme S6: Synthesis of compound <b>43</b>                                                                                                                                                               | S19      |
| 10) Table S1: <i>In vitro</i> evaluation of compounds in H <sub>37</sub> R <sub>V</sub> -TB and <i>M. smegmatis</i> in various assays and media (MIC in μM) and VERO cell toxicity (IC <sub>50</sub> in μM) | S20      |
| 11) Experimental procedure for the antibiotic susceptibility testing by the broth microdilution                                                                                                             | S1       |

|                                                                                                                                                        |             |
|--------------------------------------------------------------------------------------------------------------------------------------------------------|-------------|
| method in <i>M.smegmatis</i>                                                                                                                           | S21         |
| 12) LC/MS analysis of the cell culture experiments of compound <b>3</b> with <i>M.smegmatis</i>                                                        | S22 – S24   |
| 13) LC/MS analysis of the cell culture experiments of compound <b>11</b> with <i>M.smegmatis</i>                                                       | S25 – S27   |
| 14) LC/MS analysis of the cell culture experiments of compound <b>12</b> with <i>M.smegmatis</i>                                                       | S28 – S30   |
| 15) LC/MS analysis of the reaction described in Scheme 4 (product structures and UV trace)                                                             | S31 – S34   |
| 16) Reaction of <b>11</b> with Boc-cysteamine and LC/MS analysis                                                                                       | S35 – S37   |
| 17) Reaction of <b>11</b> with ethanethiol and LC/MS analysis                                                                                          | S38 – S40   |
| 18) Reaction of <b>11</b> with thiophenol and LC/MS analysis                                                                                           | S41 – S43   |
| 19) Reaction of <b>11</b> with Boc-cysteine and LC/MS analysis                                                                                         | S44 – S46   |
| 20) Reaction of <b>39</b> with sodium methane thiolate (NaSMe) and LC/MS analysis                                                                      | S47 – S49   |
| 21) Nitroso trapping experiment: Reaction of <b>3</b> with NaSMe and terpinene and LC/MS analysis                                                      | S50 – S52   |
| 22) Nitroso trapping experiment : Reaction of <b>3</b> with glutathione (GSH) under apparent .....pH 10-11 in the presence of 1,3-cyclohexadiene.      | S53 – S56   |
| 23) Nitroso trapping experiment: Reaction of <b>11</b> with Boc-cysteamine and 1,3-cyclohexadiene                                                      | S57 – S59   |
| 24) Nitroso trapping experiment: Reaction of <b>11</b> with Boc-cysteamine and terpinene                                                               | S60 – S62   |
| 25) Nitroso trapping experiment: Reaction of <b>11</b> with NaSMe in presence of 1,3-cyclohexadiene                                                    | S63 – S65   |
| 26) Nitroso trapping experiment: Reaction of <b>11</b> with NaSMe in presence of 1,3-cyclohexadiene under argon                                        | S66 – S68   |
| 27) Nitroso trapping experiment: Reaction of <b>3</b> with stannous chloride and 1,3-cyclohexadiene                                                    | S69 – S71   |
| 28) Reaction of <b>11</b> with potassium cyanide in presence of terpinene at rt in CH <sub>3</sub> CN/H <sub>2</sub> O                                 | S72 – S74   |
| 29) Nitroso trapping experiment: Reaction of <b>11</b> with NaBH(OAc) <sub>3</sub> .....in presence of 1,3-cyclohexadiene                              | S75 – S77   |
| 30) <sup>1</sup> H and <sup>13</sup> C NMR spectra for <b>11</b> , <b>12</b> , <b>16</b> , <b>19</b> , <b>24</b> , <b>27</b> , <b>31</b> and <b>32</b> | S78 – S85   |
| 31) <sup>1</sup> H and <sup>13</sup> C NMR spectra for unlabeled and <sup>13</sup> C enriched <b>33</b> and <b>34</b>                                  | S86 – S89   |
| 32) X-ray structure information for compound <b>32</b> .                                                                                               | S90 – S105  |
| 33) X-ray structure information for compound <b>31</b> .                                                                                               | S106 – S121 |

## **General Experimental Section**

All anhydrous solvents, reagent grade solvents for chromatography and starting materials were purchased from either Aldrich Chemical Co. (Milwaukee, WI) or Fisher Scientific (Suwanee, GA). All reactions were conducted under argon unless otherwise noted. Solvents were removed *in vacuo* on a rotary evaporator. All compounds are >98% pure by HPLC analysis and MIC values reported are the average of three individual measurements. Water was distilled and purified through a Milli-Q water system (Millipore Corp., Bedford, MA). General methods of purification of compounds involved the use of either silica cartridges purchased from AnaLogix, Inc. (Burlington, WI; [www.ana-logix.com](http://www.ana-logix.com)) or column chromatography with silica gel (230-400 mesh) purchased from Silicycle, Quebec city, Canada. The reactions were monitored by TLC on precoated Merck 60 F<sub>254</sub> silica gel plates and visualized using UV light (254 nm). All compounds were analyzed for purity by HPLC and characterized by <sup>1</sup>H and <sup>13</sup>C NMR using Varian 300MHz, 500 MHz NMR and/or Bruker 400 MHz NMR spectrometers. Chemical shifts are reported in ppm ( $\delta$ ) relative to the residual solvent peak in the corresponding spectra; chloroform  $\delta$  7.26 and  $\delta$  77.23, methanol  $\delta$  3.31 and  $\delta$  49.00 and coupling constants (*J*) are reported in hertz (Hz) (where, s = singlet, bs = broad singlet, d = doublet, dd = double doublet, bd = broad doublet, ddd = double doublet of doublet, t = triplet, tt = triple triplet, q = quartet, m = multiplet) and analyzed using 1D NMR processor (ACD/SpecManager) purchased from ACD labs (Product version 11.03). Melting points were measured on a Thomas-Hoover capillary melting point apparatus and are uncorrected. The Mass spectra values are reported as *m/z* and HRMS analyses were carried out with a Bruker MicroOTOF-Q II, electrospray ionization time-of-flight mass spectrometer. All new compounds were thoroughly characterized and previously known compounds were characterized only by <sup>1</sup>H NMR.

**(S)-(3,5-Dinitrophenyl)(2-methyl-1,4-dioxo-8-azaspiro[4.5]decan-8-yl)methanone (11)**

*S*-(+)-1,2-Propanediol (2.48 g, 31.57 mmol) and the 4-piperidone monohydrate hydrochloride (5 gm, 31.57 mmol) were dissolved in 50 mL of benzene. Then *p*-TsOH (543 mg, 3.15 mmol) was added and the reaction was heated to reflux with a Dean-Stark trap on to collect the water. After 13 h, the reaction mixture was concentrated. The crude residue was dissolved in dichloromethane and washed with saturated aqueous sodium bicarbonate solution (2 X 50 mL). The organic phase was separated, dried (MgSO<sub>4</sub>), filtered, and concentrated to yellow oil to obtain (*S*)-2-Methyl-1,4-dioxo-8-azaspiro[4.5]decane (**10**). The crude product was used without further purification for EDC-mediated coupling with benzoic acid analogues. <sup>1</sup>H-NMR (400 MHz, CDCl<sub>3</sub>) δ 8.34 (s, 1H), 4.20 (m, 1H), 4.03 (ddd, *J* = 5.7Hz, *J* = 8.0Hz, *J* = 9.6Hz, 1H), 3.41 (dt, *J* = 4.3Hz, *J* = 7.8Hz, 1H), 3.26 (m, 1H), 2.63 (m, 2H), 1.97 (m, 2H), 1.72 (m, 2H), 1.24 (d, *J* = 6.1Hz, 3H).

To a solution of **10** (0.16 g, 0.98 mmol) in acetonitrile (10 mL) was added EDC·HCl (0.26 gm, 1.34 mmol) and DMAP (0.22 gm, 1.79 mmol) and 3,5-dinitrobenzoic acid (0.2 gm, 0.9 mmol). The reaction mixture was then stirred for 22 h at room temperature. The reaction mixture was then evaporated in vacuo. The crude residue was dissolved in dichloromethane and washed with 10% aq sodium bicarbonate solution (2x) followed by 0.5M citric acid solution (2x) and brine. The organic layer was separated, dried (Na<sub>2</sub>SO<sub>4</sub>), filtered and evaporated. The crude residue was purified by column over silica gel using 10% EtOAc: DCM to afford 0.18 gm (59%) of white solid (mp = 179 °C -182 °C). <sup>1</sup>H NMR (CDCl<sub>3</sub>) δ 9.10 (t, *J* = 2.1 Hz, 1H), 8.60 (d, *J* = 2.0 Hz, 2H), 4.28 (br. s., 1H), 4.18 - 4.02 (m, 1H), 3.92 (br. s., 2H), 3.50 (br. s., 3H), 1.85 (br. s., 2 H), 1.70 (br. s., 2 H), 1.46 - 1.24 (m, 3 H). <sup>13</sup>C NMR (CDCl<sub>3</sub>) δ 165.4, 148.7, 139.6, 127.5, 119.9,

106.6, 72.6, 71.0, 46.2, 41.0, 37.1, 36.2, 36.0, 35.1, 18.6. MS (HR-ESI) C<sub>15</sub>H<sub>17</sub>N<sub>3</sub>O<sub>7</sub> (M + H)<sup>+</sup>  
calcd 352.1147, found 352.1139.

**(S)-(2-Methyl-1,4-dioxo-8-azaspiro[4.5]decan-8-yl)(3-nitro-5-(trifluoromethyl)phenyl)  
methanone (12)**

Compound **12** was synthesized in 82% yield from 3-nitro-5-(trifluoromethyl) benzoic acid using the same general procedure described for **11**. (mp = 125 °C - 128 °C) <sup>1</sup>H-NMR (CDCl<sub>3</sub>) δ 8.53 (s, 1H), 8.44 (m, 1H), 8.01 (s, 1H), 4.26 (m, 1H), 4.09 (m, 1H), 3.87 (m, 2H), 3.50 (m, 3H), 1.83 (m, 2H), 1.70 (m, 2H), 1.29 (m, 1H). <sup>13</sup>C NMR (CDCl<sub>3</sub>) δ 166.26, 148.39, 139.05, 133.21, 132.93, 129.90, 129.87, 125.32, 123.70, 121.90, 121.87, 121.84, 121.81, 121.52, 106.72, 72.58, 71.00, 18.57. MS (HR-ESI) C<sub>16</sub>H<sub>17</sub>F<sub>3</sub>N<sub>2</sub>O<sub>5</sub> (M + H)<sup>+</sup> calcd 375.1162, found 375.1155.

**(R)-3, 5-Dinitro-N-(1-phenylethyl)benzamide (14)<sup>1</sup>**

Compound **14** was synthesized in 41% yield from 3,5-dinitrobenzoic acid using the same general procedure described for **11**. <sup>1</sup>H NMR (CD<sub>3</sub>OD) δ 8.97 - 8.87 (m, 1 H), 8.64 (s, 1 H), 8.54 (s, 1 H), 7.44 - 7.13 (m, 4 H), 5.23 (q, *J* = 7.0 Hz, 1 H), 1.57 (d, *J* = 7.2 Hz, 3 H)

**(R)-3-Nitro-N-(1-phenylethyl)-5-(trifluoromethyl)benzamide (15)<sup>2</sup>**

Compound **15** was synthesized in 79% yield from 3-nitro-5-(trifluoromethyl) benzoic acid using the same general procedure described for **11**. <sup>1</sup>H NMR (CDCl<sub>3</sub>) δ 9.12 (t, *J* = 2.1 Hz, 1 H), 9.00 (d, *J* = 2.2 Hz, 2 H), 7.43 - 7.19 (m, 5 H), 5.41 - 5.23 (m, 6 H), 1.66 (d, *J* = 6.9 Hz, 3 H)

**General procedure for the reaction of thiols with compound 11**

To a solution of **11** (0.075 g, 0.21 mmol) in 9 mL of acetonitrile and 2 mL of water was added Boc-cysteamine (0.19 g, 1.07 mmol) dropwise in a 20 mL scintillation vial. The apparent pH of the reaction mixture was adjusted to pH 11-12 by dropwise addition of a 1N NaOH solution. The reaction mixture turned dark red-brown during this process. The scintillation vial was then capped tightly and the reaction mixture was stirred at room temperature and monitored by TLC and LC/MS. After 24 h, the reaction mixture was partitioned between ethyl acetate and water. The organic layer was separated and the aqueous layer was washed with ethyl acetate (2x 10 mL). The combined organic layer was washed with brine, dried (Na<sub>2</sub>SO<sub>4</sub>), filtered and evaporated in vacuo. The crude residue was purified by column chromatography using hexanes: EtOAc (1:1). Approximately 11 mg (15%) of the starting material was recovered after column along with **19** and **24**.

**(Z)-1,2-bis(3-((S)-2-Methyl-1,4-dioxo-8-azaspiro[4.5]decane-8-carbonyl)-5-nitrophenyl) diazene oxide (19)**

Yellow solid (yield = 36% , mp = 229-230 °C) <sup>1</sup>H NMR (CDCl<sub>3</sub>) δ 9.23 (d, *J* = 2.0 Hz, 1 H), 9.11 (d, *J* = 1.8 Hz, 1 H), 8.74 (d, *J* = 1.5 Hz, 1 H), 8.55 (d, *J* = 1.5 Hz, 1 H), 8.53 (d, *J* = 1.5 Hz, 1 H), 8.37 (d, *J* = 1.5 Hz, 1 H), 4.29 (br s, 2 H), 4.17 - 4.03 (m, 2 H), 3.95 (br s, 4 H), 3.66 - 3.44 (m, 6 H), 1.87 (br s, 4 H), 1.74 (br. s., 4 H), 1.27 (d, 6 H). <sup>13</sup>C NMR (CDCl<sub>3</sub>) δ 166.9, 166.0, 148.7, 148.6, 148.5, 143.9, 139.1, 138.4, 129.7, 126.7, 125.7, 123.6, 121.7, 119.0, 106.9, 106.7, 72.6, 72.5, 71.0, 46.1, 40.9, 37.2, 36.3, 36.0, 35.1, 18.6. MS (HR-ESI) C<sub>30</sub>H<sub>34</sub>N<sub>6</sub>O<sub>11</sub> (M + H)<sup>+</sup> calcd 655.2358, found 655.2337.

***tert*-Butyl 2,2'-disulfanediylobis(ethane-2,1-diyl) dicarbamate (24)**

White solid (yield = 0.17 g, 46 %, mp = 103-104 °C)  $^1\text{H}$  NMR ( $\text{CDCl}_3$ )  $\delta$  5.19 - 5.08 (m, 1 H), 3.42 (q,  $J$  = 6.0 Hz, 2 H), 2.77 (t,  $J$  = 6.4 Hz, 2 H), 1.42 (s, 9 H)  $^{13}\text{C}$  NMR ( $\text{CDCl}_3$ )  $\delta$  156.0, 79.6, 39.4, 38.5, 28.5. MS (HR-ESI)  $\text{C}_{14}\text{H}_{28}\text{N}_2\text{O}_4\text{S}_2$  ( $\text{M} + \text{Na}$ ) $^+$  calcd 375.1383, found 375.1405.

### **General procedure for the reaction of thiolates with compound 11**

To a solution of **11** (0.075 g, 0.21 mmol) in 9 mL of acetonitrile and 2 mL of water was added sodium methanethiolate in a 20 mL scintillation vial and then the vial was capped tightly. The reaction mixture immediately turned dark red-brown as soon as sodium methanethiolate was added. The reaction mixture was then stirred at room temperature and monitored by TLC and LC/MS. The reaction mixture was worked up the same way as described in the general procedure for the reaction of thiols with compound **11** described above.

### **(S)-8-amino-2-(2-Methyl-1,4-dioxo-8-azaspiro[4.5]decan-8-yl)-6-(trifluoromethyl)-4H-benzo[e][1,3]thiazin-4-one (16)**

Compound **16** was isolated from the reaction of **3** (0.3 g, 0.7 mmol) with sodium methanethiolate in 17 % yield (48 mg). Yellow solid (mp = 256-257 °C),  $^1\text{H}$  NMR ( $\text{CDCl}_3$ )  $\delta$  8.19 (s, 1 H), 7.09 (d,  $J$  = 1.5 Hz, 1 H), 4.34 - 4.20 (m, 1 H), 4.08 (dd,  $J$  = 5.8, 8.1 Hz, 2 H), 3.98 (br. s., 3 H), 3.47 (t,  $J$  = 7.9 Hz, 1 H), 1.89 - 1.69 (m, 4 H), 1.28 (d,  $J$  = 6.0 Hz, 3 H).  $^{13}\text{C}$  NMR ( $\text{CDCl}_3$ )  $\delta$  169.1, 159.9, 142.2, 124.0, 118.1, 114.4, 106.9, 72.7, 71.1, 44.4, 36.6, 35.3, 18.6. MS (HR-ESI)  $\text{C}_{17}\text{H}_{18}\text{F}_3\text{N}_3\text{O}_3\text{S}$  ( $\text{M} + \text{H}$ ) $^+$  calcd 402.1194, found 402.1122.

### **(S)-8,8'-((E)-Diazene-1,2-diyl)bis(2-((S)-2-methyl-1,4-dioxo-8-azaspiro[4.5]decan-8-yl)-6-(trifluoromethyl)-4H-benzo[e][1,3]thiazin-4-one) (27)**

Compound **27** was isolated from the reaction of **3** (0.3 g, 0.7 mmol) with sodium methanethiolate in 2 % yield (10 mg) Yellow-orange solid,  $^1\text{H}$  NMR ( $\text{CDCl}_3$ )  $\delta$  8.98 - 8.90 (m, 1 H), 8.15 (d,  $J = 1.8$  Hz, 1 H), 4.40 - 4.23 (m, 1 H), 4.13 (dd,  $J = 5.5, 8.1$  Hz, 2 H), 4.04-3.81 (m, 3H), 3.52 (t,  $J = 7.9$  Hz, 1 H), 1.87 (br. s., 4 H), 1.33 (d,  $J = 6.0$  Hz, 3 H).  $^{13}\text{C}$  NMR ( $\text{CDCl}_3$ )  $\delta$  167.5, 161.4, 147.0, 138.9, 131.0, 125.4, 116.9, 106.7, 72.8, 71.1, 33.6, 32.2, 29.9, 29.6, 23.4, 22.9, 18.6. MS (HR-ESI)  $\text{C}_{34}\text{H}_{32}\text{F}_6\text{N}_6\text{O}_6\text{S}_2$  ( $\text{M} + \text{H}$ ) $^+$  calcd 799.1802, found 799.1826.

#### **Procedure for the reaction of KCN with 11.**

To a solution of **11** (0.52 g, 1.47 mmol) in 20 mL of acetonitrile and 5 mL of water was added KCN (0.19 g, 2.95 mmol) in a 50 mL round bottom flask which was capped with a rubber septum. The reaction mixture immediately turned bluish-purple as soon as potassium cyanide was added. The reaction mixture was then stirred at room temperature for 3-4 h and monitored by TLC and LC/MS. The reaction mixture was then partitioned between ethyl acetate and water. The organic layer was separated and washed with brine, dried ( $\text{Na}_2\text{SO}_4$ ) and concentrated in vacuo. The crude residue was purified by column chromatography using EtOAc: Hexanes (7:3).

#### **(S)-3-amino-6-(2-methyl-1,4-dioxo-8-azaspiro[4.5]decane-8-carbonyl)-4-nitrobenzo[c]isoxazole-7-carbonitrile (31)**

Compound **31** was isolated from the reaction of **11** (0.52g, 1.47mmol) with sodium methanethiolate in 6.5% yield (37 mg) red solid,  $^1\text{H}$  NMR ( $\text{CDCl}_3$ )  $\delta$  7.57 (s, 1 H), 7.02 (br. s., 2 H), 4.35 - 4.20 (m, 1 H), 4.17 - 4.05 (m, 1 H), 4.01 - 3.84 (m, 2 H), 3.56 - 3.41 (m, 3 H), 1.92 - 1.62 (m, 4 H), 1.30 (m, 3 H).  $^{13}\text{C}$  NMR ( $\text{CDCl}_3$ )  $\delta$  166.4, 163.5, 157.1, 146.5, 146.1, 115.3,



112.3, 106.7, 91.1, 72.6, 72.6, 71.0, 45.7, 45.6, 40.7, 40.7, 37.0, 36.0, 35.9, 34.8, 18.6, 18.6. MS (HR-ESI) C<sub>17</sub>H<sub>17</sub>N<sub>5</sub>O<sub>6</sub> (M + Na)<sup>+</sup> calcd 410.1071 found 410.1071.

**(S)-(3-amino-4-nitrobenzo[c]isoxazol-6-yl)(2-methyl-1,4-dioxo-8-azaspiro[4.5]decan-8-yl)methanone (32)**

Compound **32** was isolated from the reaction of **11** (0.52 g, 1.47 mmol) with sodium methanethiolate in 3% yield (15 mg) red solid, <sup>1</sup>H NMR (CDCl<sub>3</sub>) δ 7.71 (s, 1 H), 7.54 (s, 1 H), 6.57 (br. s., 2 H), 4.27 (br. s., 1 H), 4.10 (br. s., 1 H), 4.01 - 3.50 (m, 5 H), 1.83 - 1.70 (br. s., 4 H), 1.30 (d, *J* = 5.3 Hz, 3 H) <sup>13</sup>C NMR (CDCl<sub>3</sub>) δ 167.0, 165.0, 158.9, 143.9, 137.9, 119.6, 118.0, 106.9, 90.0, 72.5, 71.0, 46.0, 40.7, 37.2, 36.2, 36.0, 29.9, 18.6. MS (HR-ESI) C<sub>16</sub>H<sub>18</sub>N<sub>4</sub>O<sub>6</sub> (M + H)<sup>+</sup> calcd 363.1299 found 363.1300.

**Procedure for the reaction of K<sup>13</sup>CN (13C, 99% atom enriched) with 3.**

The reaction was carried out as described above except for using compound **3** (0.500 g, 1.16 mmol) and K<sup>13</sup>CN (0.15 g, 2.31 mmol). The crude residue was purified by prep-TLC using DCM: MeOH (15:1). The reaction of **3** with KCN was also carried out for the comparison and to obtain the “simplified” <sup>13</sup>C NMR spectra. See supporting information for both <sup>1</sup>H and <sup>13</sup>C NMR spectra for the products of both K<sup>13</sup>CN and KCN reactions.

**(S)-3-amino-8-(2-methyl-1,4-dioxo-8-azaspiro[4.5]decan-8-yl)-4-(trifluoromethyl)-6H-isoxazolo[3',4':3,4]benzo[1,2-e][1,3]thiazin-6-one (33)**

Yellow solid (96 mg, 19 %) <sup>1</sup>H NMR (DMSO-*d*<sub>6</sub>) δ 8.11 (br. s., 2 H), 7.51 (br. s., 1 H), 4.14 - 4.29 (m, 1H), 4.03 - 4.14 (m, 1 H), 4.00-3.65 (br. m, 4 H), 3.44 (t, *J*=7.63 Hz, 1 H), 1.78 (br. s., 4 H), 1.22 (d, *J* = 6.16 Hz, 3 H) <sup>13</sup>C NMR (DMSO-*d*<sub>6</sub>) <sup>13</sup>C NMR (151MHz, DMSO-*d*<sub>6</sub>) δ 167.8,

165.9, 159.2, 155.1, 123.8, 123.8, 123.7, 122.1, 121.9, 121.8, 120.9, 115.2, 106.3, 91.0, 90.5, 71.8, 70.1, 35.6, 34.4, 30.7, 18.4. MS (HR-ESI)  $C_{17}^{13}CH_{17}F_3N_4O_4S$  (M + Na)<sup>+</sup> calcd 466.0804, found 466.0828.

**(S)-3-amino-8-(2-methyl-1,4-dioxa-8-azaspiro[4.5]decan-8-yl)-6-oxo-4-(trifluoromethyl)-6H-isoxazolo[3',4':3,4]benzo[1,2-e][1,3]thiazine-5-carbonitrile (34)**

Yellow solid, (85 mg, 16 %). <sup>1</sup>H NMR (DMSO-*d*<sub>6</sub>) δ 8.80 (br. s., 2 H), 4.31 - 4.19 (m, 1 H), 4.09 (dd, *J* = 5.7, 8.1 Hz, 1 H), 4.05-3.65 (br. m, 4H), 3.45 (t, *J* = 7.8 Hz, 1 H), 1.78 (br. s., 4 H), 1.26 - 1.14 (m, 3 H) <sup>13</sup>C NMR (DMSO-*d*<sub>6</sub>) δ 167.4, 165.8, 165.5, 164.5, 157.9, 153.5, 153.5, 130.6, 125.4, 122.8, 121.0, 114.1, 106.3, 97.9, 97.3, 92.6, 92.1, 71.8, 70.1, 35.5, 34.3, 29.1, 18.4. MS (HR-ESI)  $C_{17}^{13}C_2H_{16}F_3N_5O_4S$  (M + Na)<sup>+</sup> calcd 492.0834, found 492.0823

References:

- 1) Huang, S.-H.; Bai, Z.-W.; Feng, J.-W. *Mag Reson Chem* **2009**, *47*, 423-427.
- 2) Trefzer, C.; Rengifo-Gonzalez, M.; Hinner, M. J.; Schneider, P.; Makarov, V.; Cole, S. T.; Johnsson, K. *J Am Chem Soc* **2010**, *132*, 13663-13665.

### **Description of the cell culture experiments of 3, 11 and 12 using *M. smegmatis* described in Scheme 3**

A heavy inoculum of *M. smegmatis* was prepared by growing the organism in mycobacteria culture media for 48 h. It was then centrifuged @ 3000 rpm for 20 min. The pellet was resuspended in saline, centrifuged and resuspended in MH2 (Mueller Hinton broth 2) broth. A standard solution of test compounds was prepared in DMSO (compound **11** – 1.5 mg, compound **12** - 1.5 mg, BTZ043 – 0.5 mg) and added to 50 mL of MH2 broth in a 125 mL baffle flask. was then added to the flask. To each of the test compounds was added 3 mL of *M. smegmatis* inoculum. Separate flasks were prepared as controls with test compounds in the culture media as non-mycobacterial controls.

All of the flasks were incubated at 37°C for 24 h in a shaker (Lab-Line® Incubator-Shaker), then the flasks were cooled on ice to stop the reaction. The test compounds with *M. smegmatis* were centrifuged @ 3000 rpm for 20 min and filtered through a 2 µ filter. The filtrate was then extracted with chloroform (50 mL). The organic layer was separated and the aqueous portion was washed with additional (2x 25mL) chloroform. The combined organic layer was washed with brine, dried (Na<sub>2</sub>SO<sub>4</sub>), filtered and concentrated in vacuo. The crude residue was resuspended in methanol and analysed by LC/MS.

### Mulliken charges calculated by AM1 for BTZ043 (3)

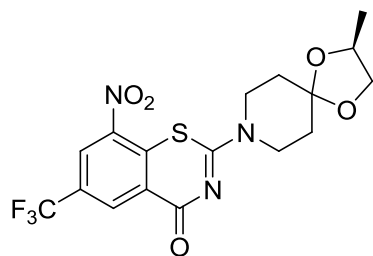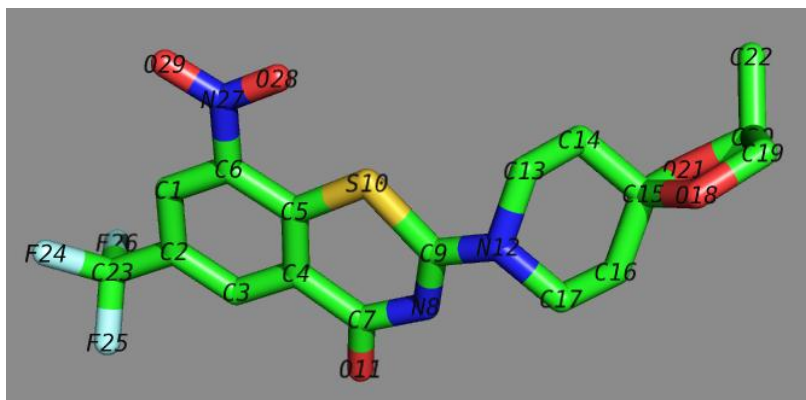

The structure was minimized by AM1 (Austin Model 1) method.

Mulliken charges with hydrogens summed into heavy atoms, the charges related to the atoms of interest are underlined.

| <u>Element number</u> |   | <u>Mulliken Charge</u> |
|-----------------------|---|------------------------|
| 1                     | C | <u>0.210219</u>        |
| 2                     | C | <u>-0.198556</u>       |
| 3                     | C | <u>0.226967</u>        |
| 4                     | C | <u>-0.181027</u>       |
| 5                     | C | <u>-0.178267</u>       |
| 6                     | C | <u>-0.156418</u>       |
| 7                     | C | <u>0.316634</u>        |
| 8                     | N | <u>-0.283909</u>       |
| 9                     | C | <u>-0.026508</u>       |
| 10                    | S | <u>0.506241</u>        |
| 11                    | O | <u>-0.276472</u>       |
| 12                    | N | <u>-0.208898</u>       |
| 13                    | C | <u>0.177176</u>        |
| 14                    | C | <u>0.007840</u>        |
| 15                    | C | <u>0.203827</u>        |
| 16                    | C | <u>0.050676</u>        |
| 17                    | C | <u>0.194378</u>        |
| 18                    | O | <u>-0.297603</u>       |
| 19                    | C | <u>0.157588</u>        |
| 20                    | C | <u>0.122579</u>        |
| 21                    | O | <u>-0.289048</u>       |
| 22                    | C | <u>0.035130</u>        |
| 23                    | C | <u>0.474068</u>        |
| 24                    | F | <u>-0.158655</u>       |
| 25                    | F | <u>-0.154918</u>       |
| 26                    | F | <u>-0.155915</u>       |
| 27                    | N | <u>0.570302</u>        |
| 28                    | O | <u>-0.355820</u>       |
| 29                    | O | <u>-0.331611</u>       |

## Mulliken charges calculated by AM1 for 11

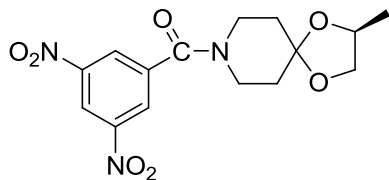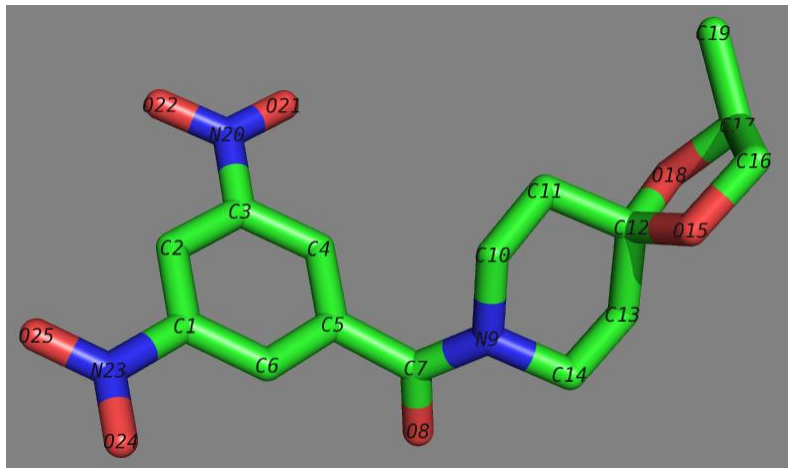

The structure was minimized by AM1 method.

Mulliken charges with hydrogens summed into heavy atoms, the charges related to the atoms of interest are underlined.

| <u>Element number</u> |   | <u>Mulliken Charge</u> |
|-----------------------|---|------------------------|
| 1                     | C | -0.146277              |
| 2                     | C | 0.205977               |
| 3                     | C | -0.147038              |
| 4                     | C | 0.172547               |
| 5                     | C | -0.121670              |
| 6                     | C | 0.199720               |
| 7                     | C | 0.336145               |
| 8                     | O | -0.335082              |
| 9                     | N | -0.306542              |
| 10                    | C | 0.173958               |
| 11                    | C | 0.003857               |
| 12                    | C | 0.206237               |
| 13                    | C | 0.044310               |
| 14                    | C | 0.200909               |
| 15                    | O | -0.296153              |
| 16                    | C | 0.157641               |
| 17                    | C | 0.122766               |
| 18                    | O | -0.290659              |
| 19                    | C | 0.036280               |
| 20                    | N | 0.572789               |
| 21                    | O | -0.346568              |
| 22                    | O | -0.336439              |
| 23                    | N | 0.572806               |
| 24                    | O | -0.339979              |
| 25                    | O | -0.339535              |

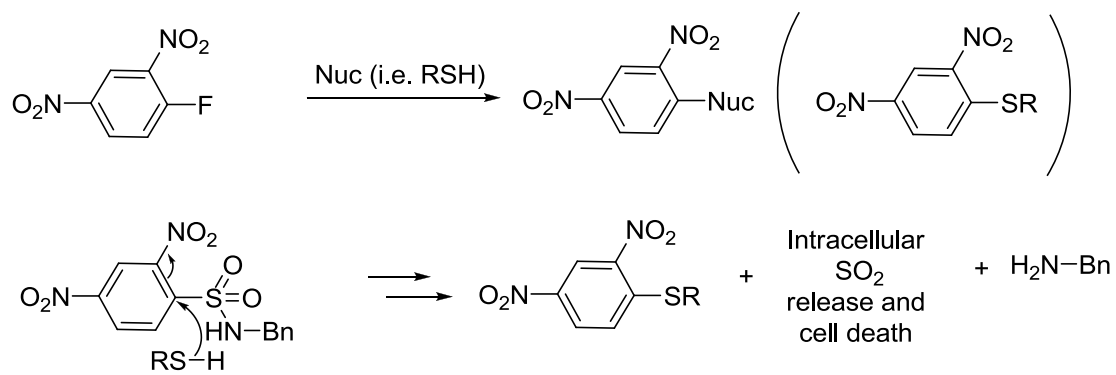

**Scheme S1:** Classical nucleophilic aromatic substitution at nitroaromatic compounds such as 2,4-dinitrofluorobenzene (Sangers reagent) and 2,4-dinitrobenzenesulfonamide with thiols.

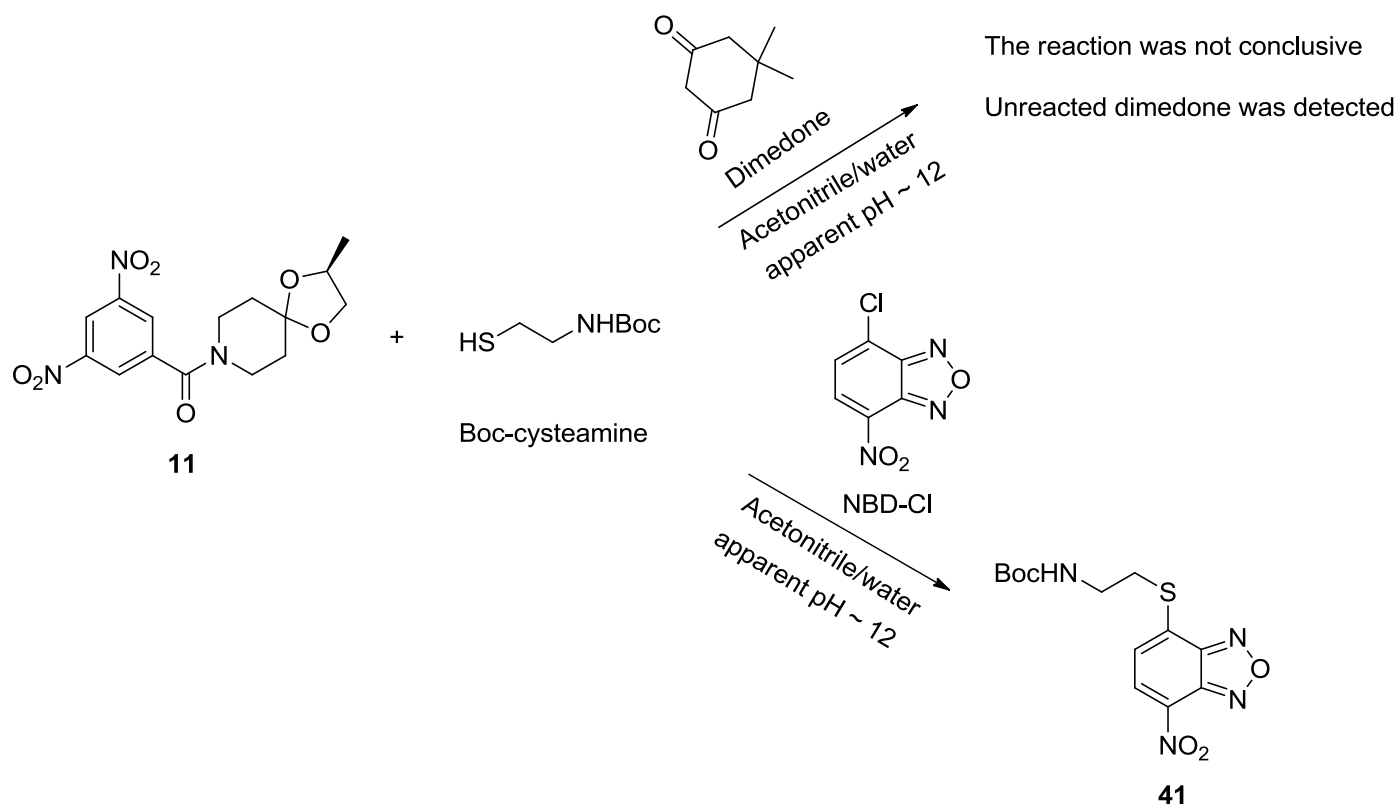

**Scheme S2:** Reaction of **11** with sulfenic acid trapping agents such as dimedone and NBD-Cl and synthesis of compound **41**.

The reaction of **11** with NBD-Cl in presence of Boc-cysteamine at apparent pH 12 indicated the formation of **41** by TLC analysis and LCMS. The formation of **41** was separately confirmed by the reacting Boc-cysteamine (0.100g, 0.56 mmol) with NBD-Cl (0.226 g, 1.13 mmol) in acetonitrile/water solvent system at apparent pH 12. The reaction was complete in 5 h, the reaction mixture was partitioned between ethyl acetate and dilute ammonium chloride solution. The organic layer was separated, dried ( $\text{Na}_2\text{SO}_4$ ) and concentrated in vacuo. The crude residue was purified by column over silica gel using hexanes: EtOAc (1:1) to afford 0.095 g (49%) of **37**.  
 $^1\text{H}$  NMR ( $\text{CDCl}_3$ )  $\delta$  8.47 (d,  $J = 7.8$  Hz, 1 H), 7.55 (d,  $J = 7.8$  Hz, 1 H), 3.56 - 3.40 (m, 4 H), 1.53 - 1.41 (m, 9 H)  
 $^{13}\text{C}$  NMR ( $\text{CDCl}_3$ )  $\delta$  149.5, 142.7, 140.5, 131.2, 121.4, 80.5, 77.6, 76.9, 39.4, 31.3, 28.5.





General procedure for the formation of N-O cycloadducts (nitroso trapping experiments) using stannous chloride and 1,3-cyclohexadiene : the example synthesis of compound **40**.

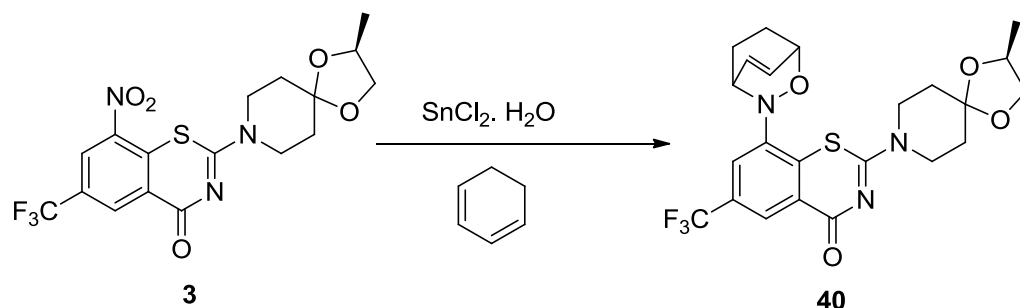

**Scheme S4:** Syntheses of compounds **40**.

To a solution of **3** (0.02 g, 0.05 mmol) in 5 mL DMF was added 1,3-Cyclohexadiene (0.06  $\mu\text{L}$ , 0.5 mmol) dropwise followed by the solution of stannous chloride (0.01 g, 0.05 mmol) in 2.5 mL DMF. The reaction mixture was then stirred at rt and monitored by LC/MS for the formation of the hetero Diels-Alder cycloadducts. After 24 h, of the reaction significant amount of the starting material was still detected along with the desired cycloadduct along with the reduced amine by product of **3**. Therefore an additional amount of stannous chloride (0.011g, 0.05 mmol) dissolved in 2.5 mL of DMF was added and the reaction was ran for additional 2 days at room temperature. The reaction mixture was then diluted with 20 mL water and then extracted with 20 mL DCM. The DCM extract was further washed with 2 x with 20 mL water. The organic layer was separated and concentrated in vacuo. The crude residue was purified by preparative HPLC to obtain **40** (5.9 mg, 26%).  $^1\text{H}$  NMR (DMSO)  $\delta$  8.16 (d,  $J = 1.5$  Hz, 1 H), 7.43 (d,  $J = 2.1$  Hz, 1 H), 6.88 (ddd,  $J = 1.5$ , 6.1, 8.0 Hz, 1 H), 6.11 (ddd,  $J = 1.3$ , 6.2, 8.0 Hz, 1 H), 4.88 (td,  $J = 2.1$ , 3.8 Hz, 1 H), 4.29 (d,  $J = 4.1$  Hz, 1 H), 4.26 (dt,  $J = 6.1$ , 7.5 Hz, 1 H), 4.10 (dd,  $J = 5.7$ , 8.1 Hz, 1 H), 4.01 – 3.82 (m, 4H), 3.46 (td,  $J = 1.5$ , 7.8 Hz, 1 H), 2.29 - 2.22 (m, 2 H), 2.14 - 2.07 (m, 2 H), 1.54 - 1.43 (m, 2 H), 1.42 - 1.33 (m, 2 H), 1.23 (d,  $J = 6.2$  Hz, 3 H). MS (LR-EI)  $\text{C}_{23}\text{H}_{24}\text{F}_3\text{N}_3\text{O}_4\text{S}$  ( $\text{M} + \text{H}$ )<sup>+</sup> calcd 496.15, found 496.12.

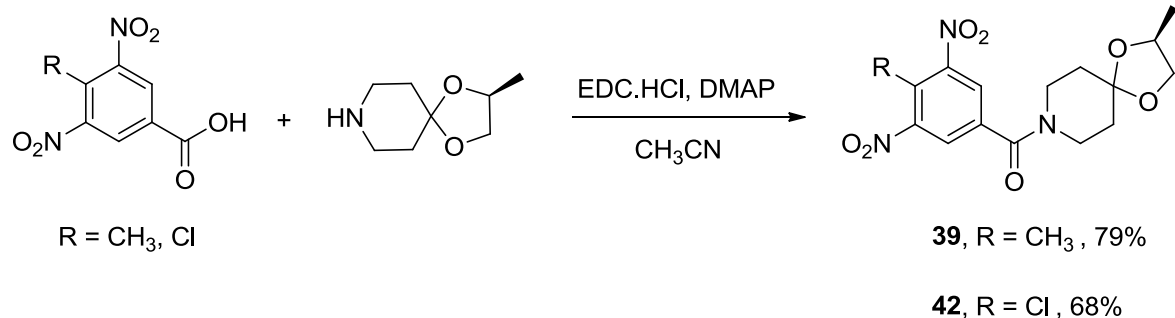

**Scheme S5:** Syntheses of compounds **35** and **42**.

**(S)-(4-Methyl-3,5-dinitrophenyl)(2-methyl-1,4-dioxa-8-azaspiro[4.5]decan-8-yl)methanone (39)**

Compound **39** was synthesized in 79% yield from 4-methyl-3,5-dinitrobenzoic acid using the same general procedure described for **11**. (mp = 143 °C -145 °C) <sup>1</sup>H NMR (CDCl<sub>3</sub>) δ 8.05 (s, 2 H), 4.28 (br. s., 1 H), 4.11 (br s, 1 H), 3.88 (br s, 2 H), 3.51 (br s, 3 H), 2.62 (s, 3 H), 1.67-1.92 (m, 4 H), 1.38 - 1.26 (m, 3 H). <sup>13</sup>C NMR (CDCl<sub>3</sub>) δ 165.4, 151.7, 136.0, 128.8, 126.3, 106.7, 72.6, 71.0, 46.1, 41.0, 37.2, 36.0, 35.0, 18.6, 15.2. MS (HR-ESI) C<sub>16</sub>H<sub>19</sub>N<sub>3</sub>O<sub>7</sub> (M + H)<sup>+</sup> calcd 366.1296, found 366.1298.

**(S)-(4-Chloro-3,5-dinitrophenyl)(2-methyl-1,4-dioxa-8-azaspiro[4.5]decan-8-yl)methanone (42)**

Compound **42** was synthesized in 68% yield from 4-chloro-3,5-dinitrobenzoic acid using the same general procedure described for **11** without using DMAP. (mp = 112 °C -115 °C) <sup>1</sup>H NMR (CDCl<sub>3</sub>) δ 8.04 (s, 2 H), 4.27 (br s, 1 H), 4.09 (t, J = 6.3 Hz, 1 H), 3.85 (br s, 2 H), 3.63 - 3.34 (m, 3 H), 1.95 - 1.75 (m, 2 H), 1.70 (br s, 2 H), 1.29 (d, J = 6.0 Hz, 3 H). <sup>13</sup>C NMR (CDCl<sub>3</sub>) δ 164.5, 149.7, 136.8, 127.9, 126.7, 121.8, 106.5, 72.6, 71.0, 46.1, 41.0, 37.1, 36.1, 35.9, 35.0, 18.5. MS (HR-ESI) C<sub>15</sub>H<sub>16</sub>ClN<sub>3</sub>O<sub>7</sub> (M + H)<sup>+</sup> calcd 386.0750, found 386.0775.

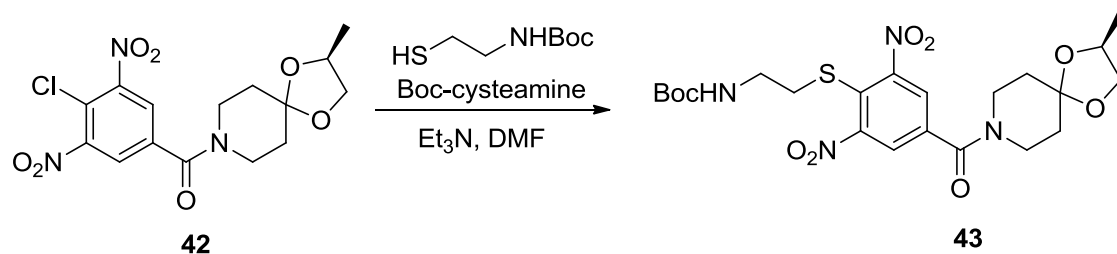

**Scheme S6:** Synthesis of compound **43**.

**(S)-tert-butyl (2-(4-(2-methyl-1,4-dioxaspiro[4.5]decane-8-carbonyl)-2,6-dinitrophenylthio)ethylcarbamate (43)**

To a solution of **42** (0.100 g, 0.26 mmol) in 2 mL DMF was added Boc-cysteamine (0.07 g, 0.39 mmol) dissolved in 1 mL DMF dropwise. The reaction mixture was then stirred at rt for 1.5 h. The reaction mixture was then quenched with ice water and then partitioned between ethyl acetate and water. The organic layer was separated, washed with brine, dried ( $\text{Na}_2\text{SO}_4$ ) and concentrated in vacuo. The crude residue was purified by column over silica gel using hexanes: EtOAc (3:1) to afford **43** (0.100 g, 73%).  $^1\text{H}$  NMR ( $\text{CDCl}_3$ )  $\delta$  7.89 (s, 2 H), 4.83 (br. s., 1 H), 4.28 (br. s., 1 H), 4.10 (br. s., 1 H), 3.88 (br. s., 2 H), 3.54 (br. s., 1 H), 3.50 (br. s., 2 H), 3.33 (br. s., 2 H), 3.10 (s, 2 H), 1.84 (br. s., 2 H), 1.72 (br. s., 2 H), 1.43 (s, 9 H), 1.31 (d,  $J = 5.9$  Hz, 3 H).  $^{13}\text{C}$  NMR ( $\text{CDCl}_3$ )  $\delta$  164.9, 155.1, 138.3, 125.2, 106.6, 72.6, 71.0, 54.0, 46.1, 41.0, 40.0, 37.8, 37.1, 36.0, 35.0, 29.9, 29.5, 28.5, 18.6. MS (HR-ESI)  $\text{C}_{22}\text{H}_{30}\text{N}_4\text{O}_9\text{S}$  ( $\text{M} + \text{Na}$ ) $^+$  calcd 549.1626, found 549.1598.

**Table S1:** *In vitro* evaluation of compounds in H<sub>37</sub>R<sub>V</sub>-TB and *M. smegmatis* in various assays and media (MIC in  $\mu$ M) and VERO cell toxicity (IC<sub>50</sub> in  $\mu$ M)

| Comps     | CLogP | H <sub>37</sub> R <sub>V</sub> -TB |      |           |      | M. smegmatis | VERO    |
|-----------|-------|------------------------------------|------|-----------|------|--------------|---------|
|           |       | GAS                                | GAST | 7H12      | LORA |              |         |
| <b>11</b> | 0.56  | nd                                 | 0.5  | 0.8       | >10  | 50           | >100    |
| <b>12</b> | 1.69  | nd                                 | >50  | >50       | >50  | 500          | >50     |
| <b>14</b> | 2.48  | 0.55                               | nd   | 0.25      | 49   | 0.78         | >64     |
| <b>15</b> | 4.32  | 1.76                               | nd   | 0.95      | >64  | 3.13         | >64     |
| INH       | nd    | 0.22                               | 0.48 | 0.37      | >512 | nd           | >128    |
| RMP       | nd    | 0.11                               | 0.10 | 0.05-0.06 | 0.62 | nd           | 100-125 |

Comps, Compounds; CLogP, calculated LogP value (ChemBioDraw Ultra 12.0.2.1076); GAS, glycerol-alanine-salts media; GAST, iron deficient glycerol-alanine-salts with Tween 80 media; 7H12, 7H9 broth base media with BSA, casein hydrolysate, catalase, palmitic acid; LORA, low oxygen recover assay; VERO, African green monkey kidney cell line, nd, not determined,. Values reported are the average of three individual measurements.

**Description of TB (GAS<sup>54</sup>, GAST<sup>55</sup>, 7H12<sup>54</sup>) by Microplate Alamar Blue assay (MABA) to determine MIC values against replicating TB and low-oxygen recovery assay (LORA) to determine activity against non-replicating *M. tuberculosis*<sup>56</sup>:**

All these assays were performed as per the published protocols. <sup>1-3</sup>

#### References

- (1) Collins, L.; Franzblau, S. G. *Antimicrobial Agents Chemother* **1997**, *41*, 1004-9.
- (2) De Voss, J. J.; Rutter, K.; Schroeder, B. G.; Su, H.; Zhu, Y.; Barry, C. E., 3rd *Proc Natl Acad Sci U S A* **2000**, *97*, 1252-7.
- (3) Cho, S. H.; Warit, S.; Wan, B.; Hwang, C. H.; Pauli, G. F.; Franzblau, S. G. *Antimicrobial Agents Chemother* **2007**, *51*, 1380-5.

## **Experimental procedure for the antibiotic susceptibility testing by the broth microdilution method in *M. smegmatis*.**

Antibacterial activity of the compounds was determined by measuring their minimum inhibitory concentrations (MIC<sub>90</sub>'s) using the broth microdilution method according to the Clinical and Laboratory Standards Institute (CLSI, formerly the NCCLS) guidelines.<sup>1</sup> Each well of a 96-well microtiter plate was filled with 50 µL of sterile MHII broth. Each test compound was dissolved in DMSO making a 1mg/ml solution, then diluted with sterile MHII broth to 40ug/ml. Exactly 50 µL of the compound solution was added to the first well of the microtiter plate and 2-fold serial dilutions were made down each row of the plate. Exactly 50 µL of bacterial (IN BROTH) inoculum ( $5 \times 10^5$  CFU/mL) was then added to each well giving a total volume of 100 µL/well and a compound concentration gradient of 10ug/ml –0.0049ug/ml. The plate was incubated at 37 °C for 18-20 h and then each well was examined for bacterial growth. The MIC<sub>90</sub> was recorded as the lowest compound concentration required to inhibit 90% of bacterial growth as judged by turbidity of the culture media relative to a row of wells filled with a DMSO standard. Ciprofloxacin was included in a control row at a concentration gradient of 5ug/ml-.0025ug/ml.

### **References**

1. *Methods for Dilution Antimicrobial Susceptibility Tests for Bacteria that Grow Aerobically*, 8<sup>th</sup> ed. (Villanova, PA, USA), Clinical and Laboratory Standards Institute (CLSI), **2009**, approved standard document M07-A7.

Cell culture experiments of compounds 3

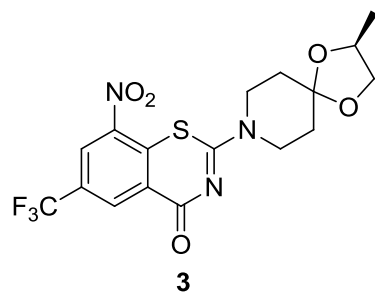

Molecular Weight: 431.39

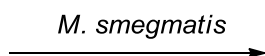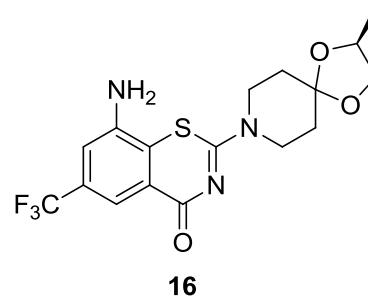

Molecular Weight: 401.40

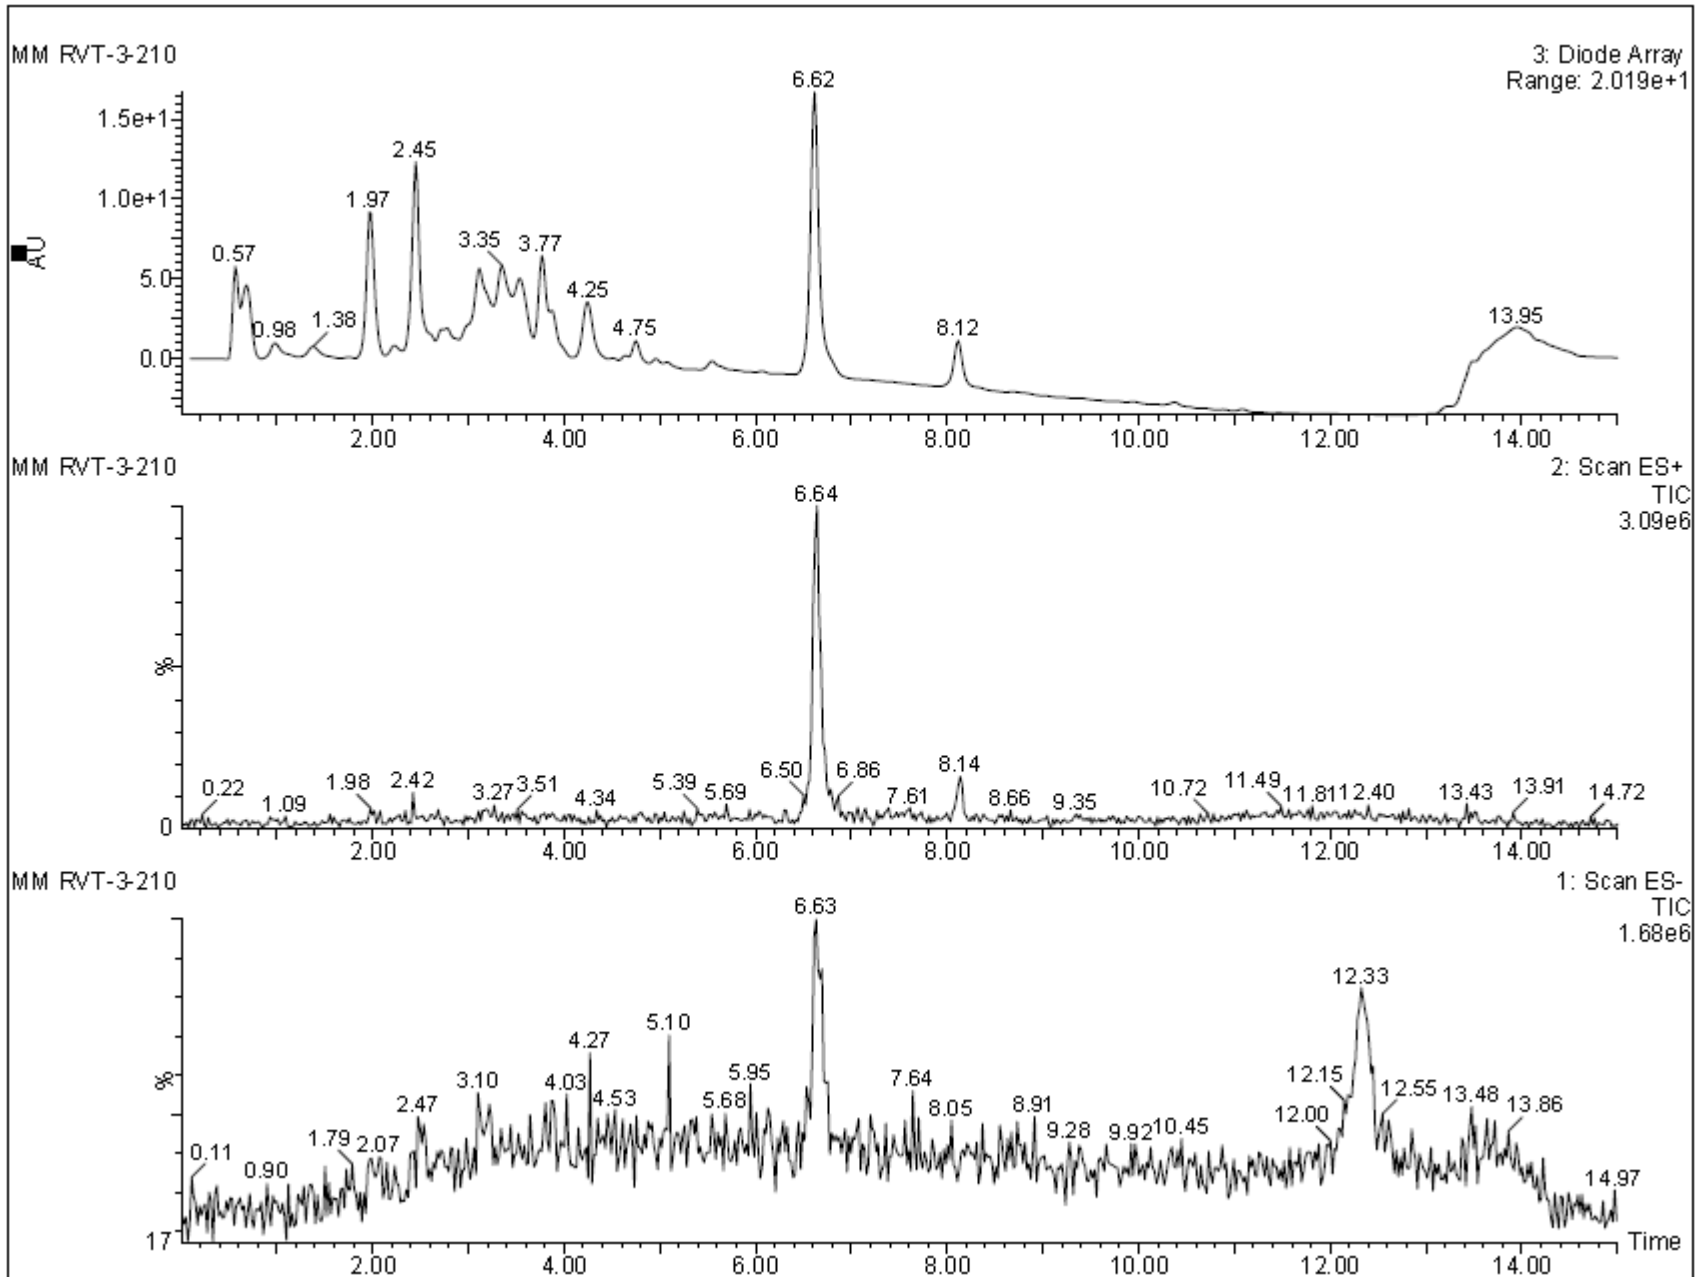

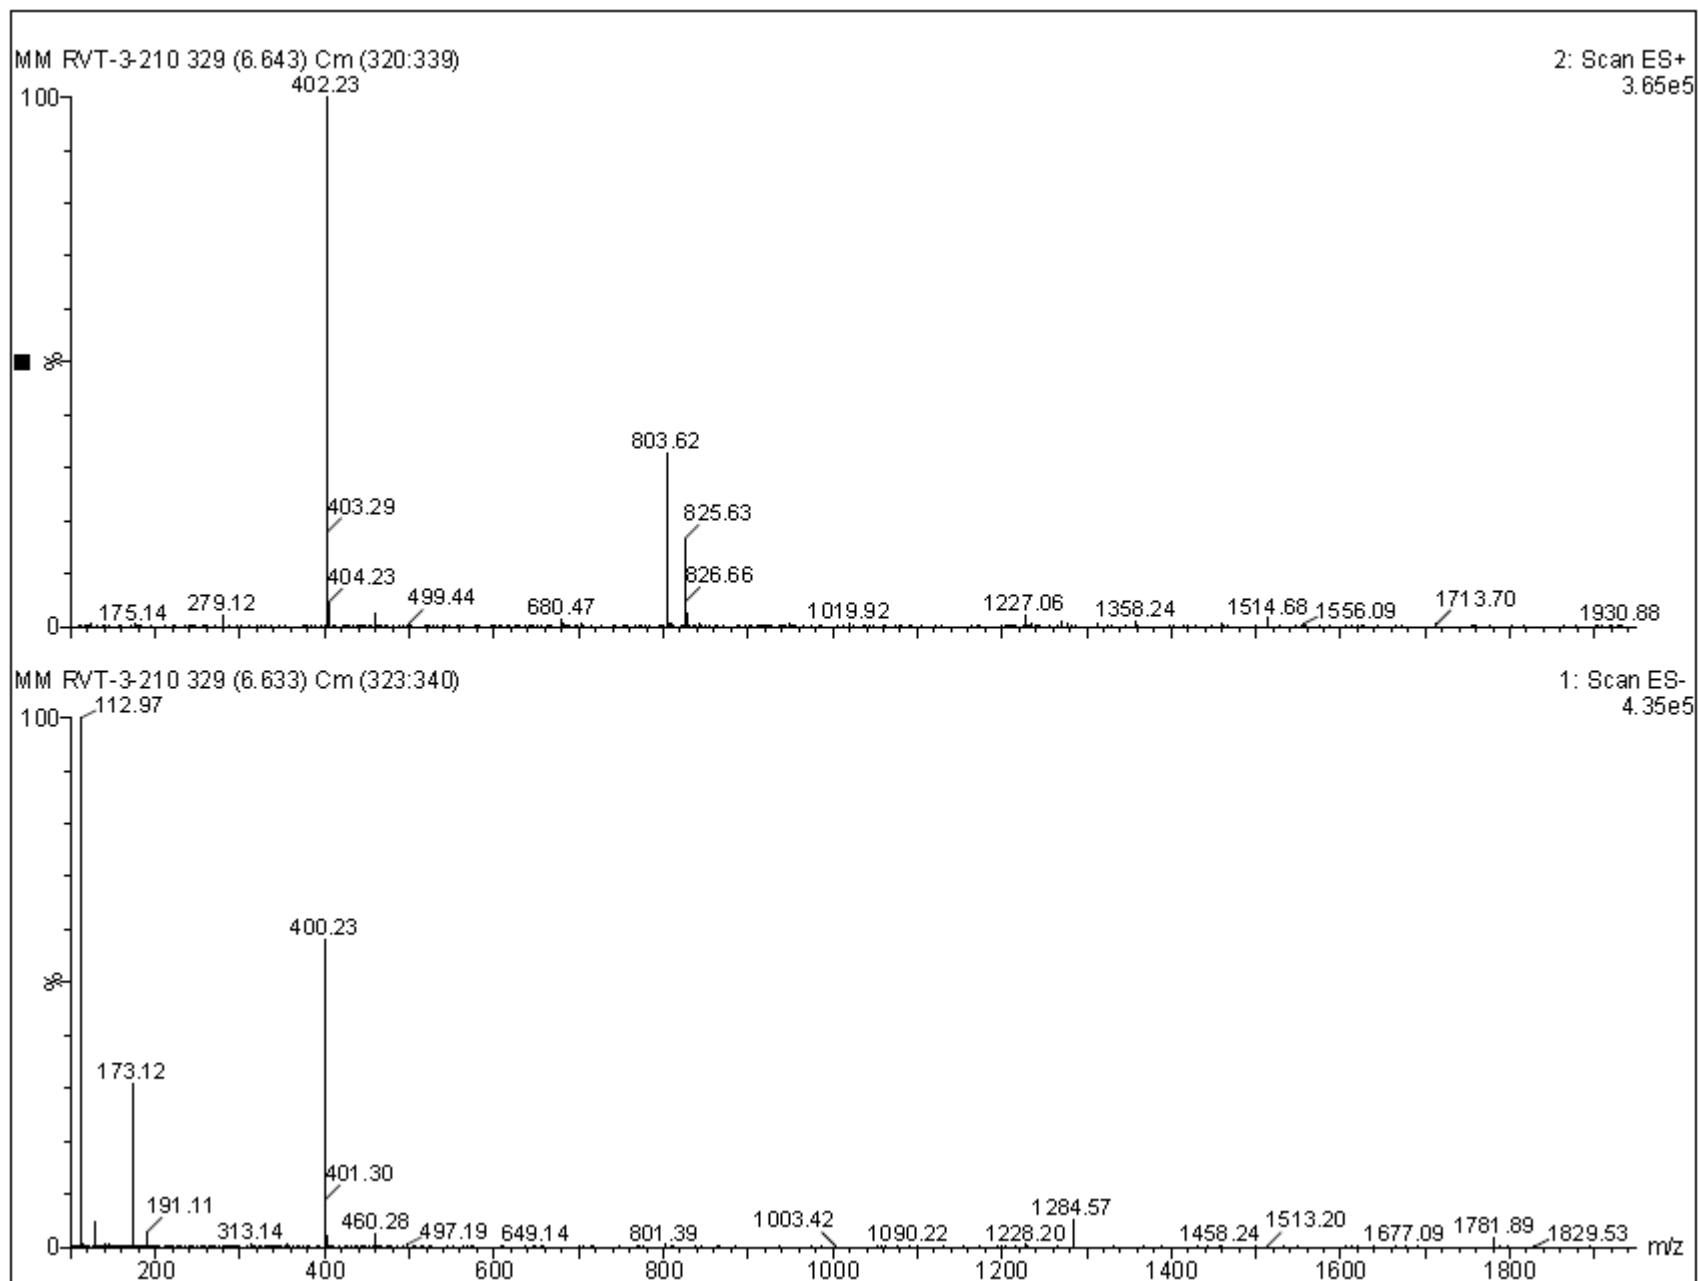



Cell culture experiments of compounds 11

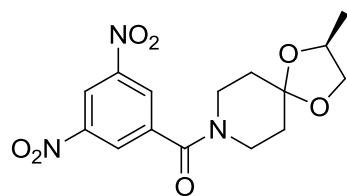

**11**

Molecular Weight: 351.31

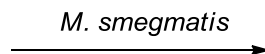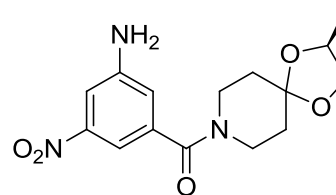

**17**

Molecular Weight: 321.33

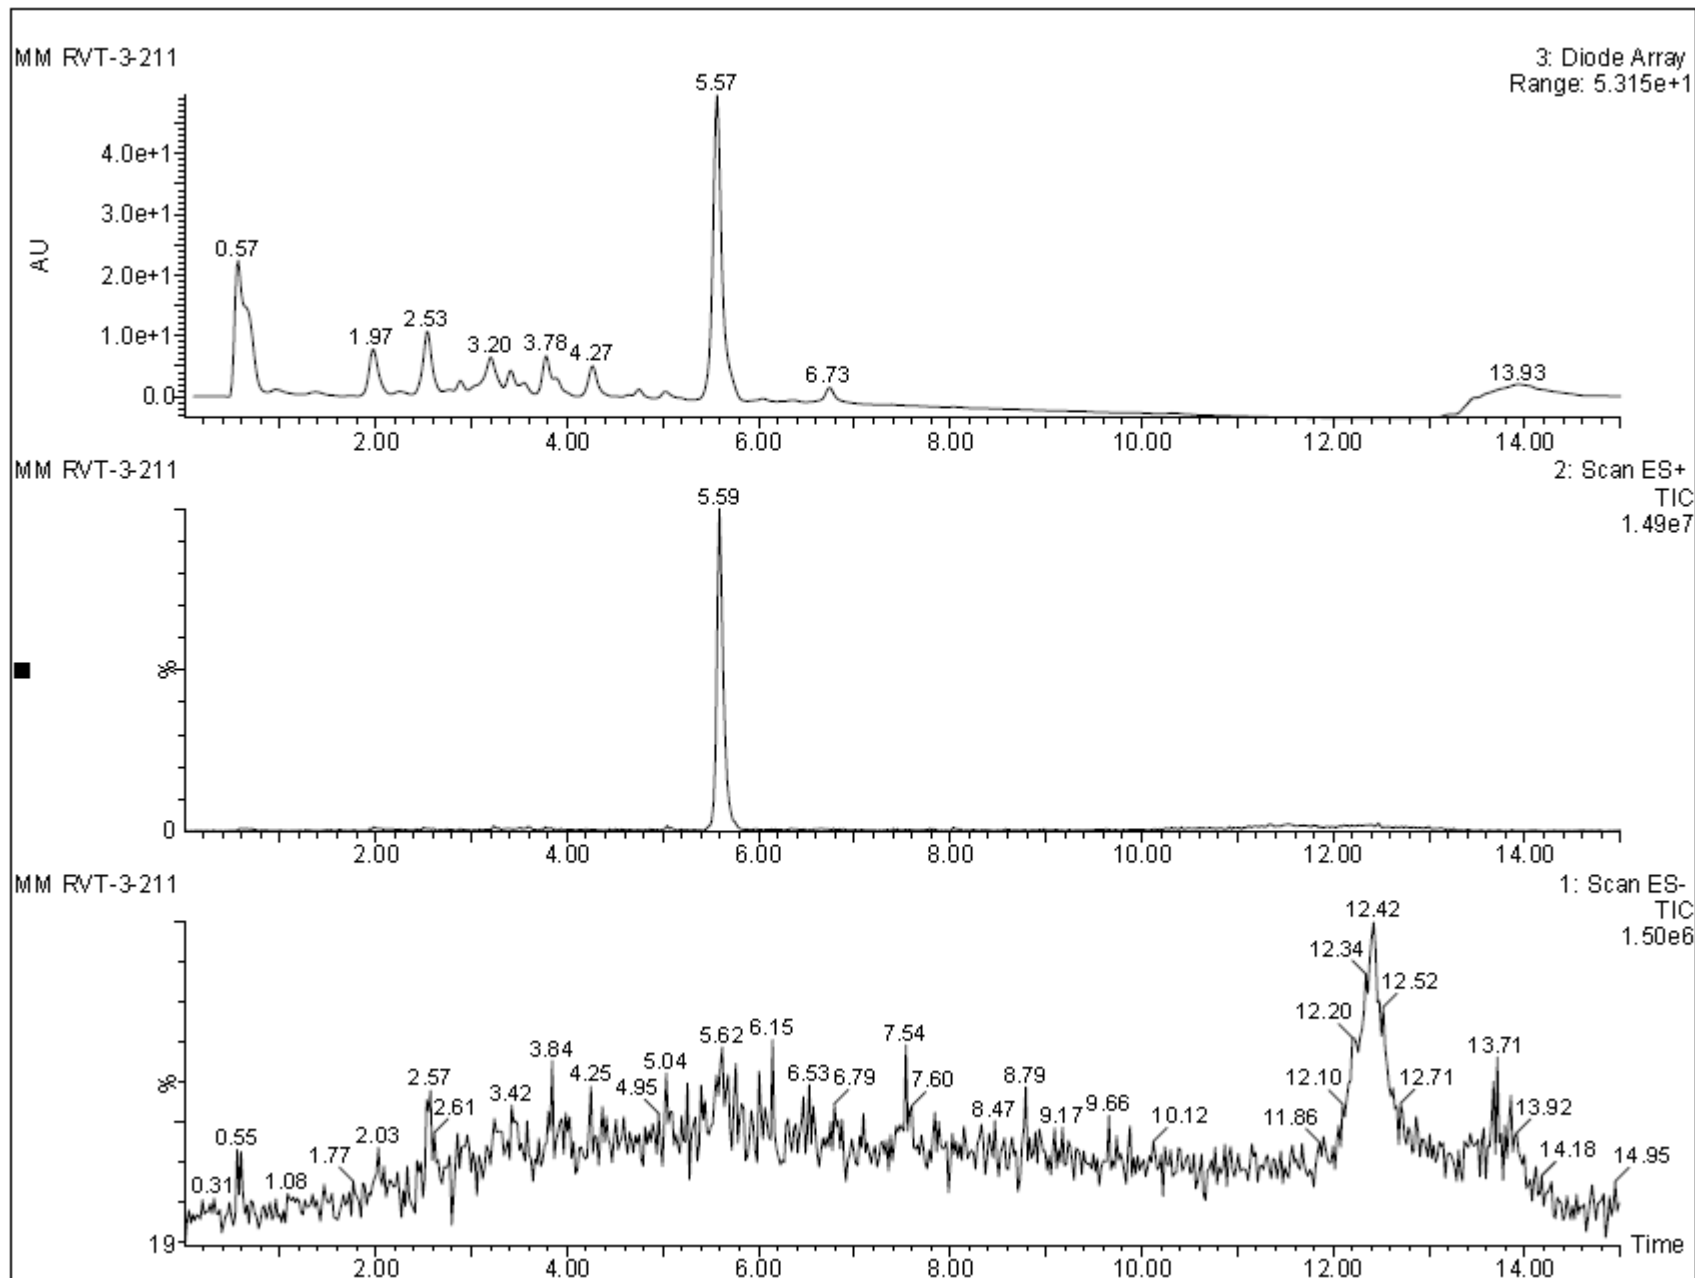

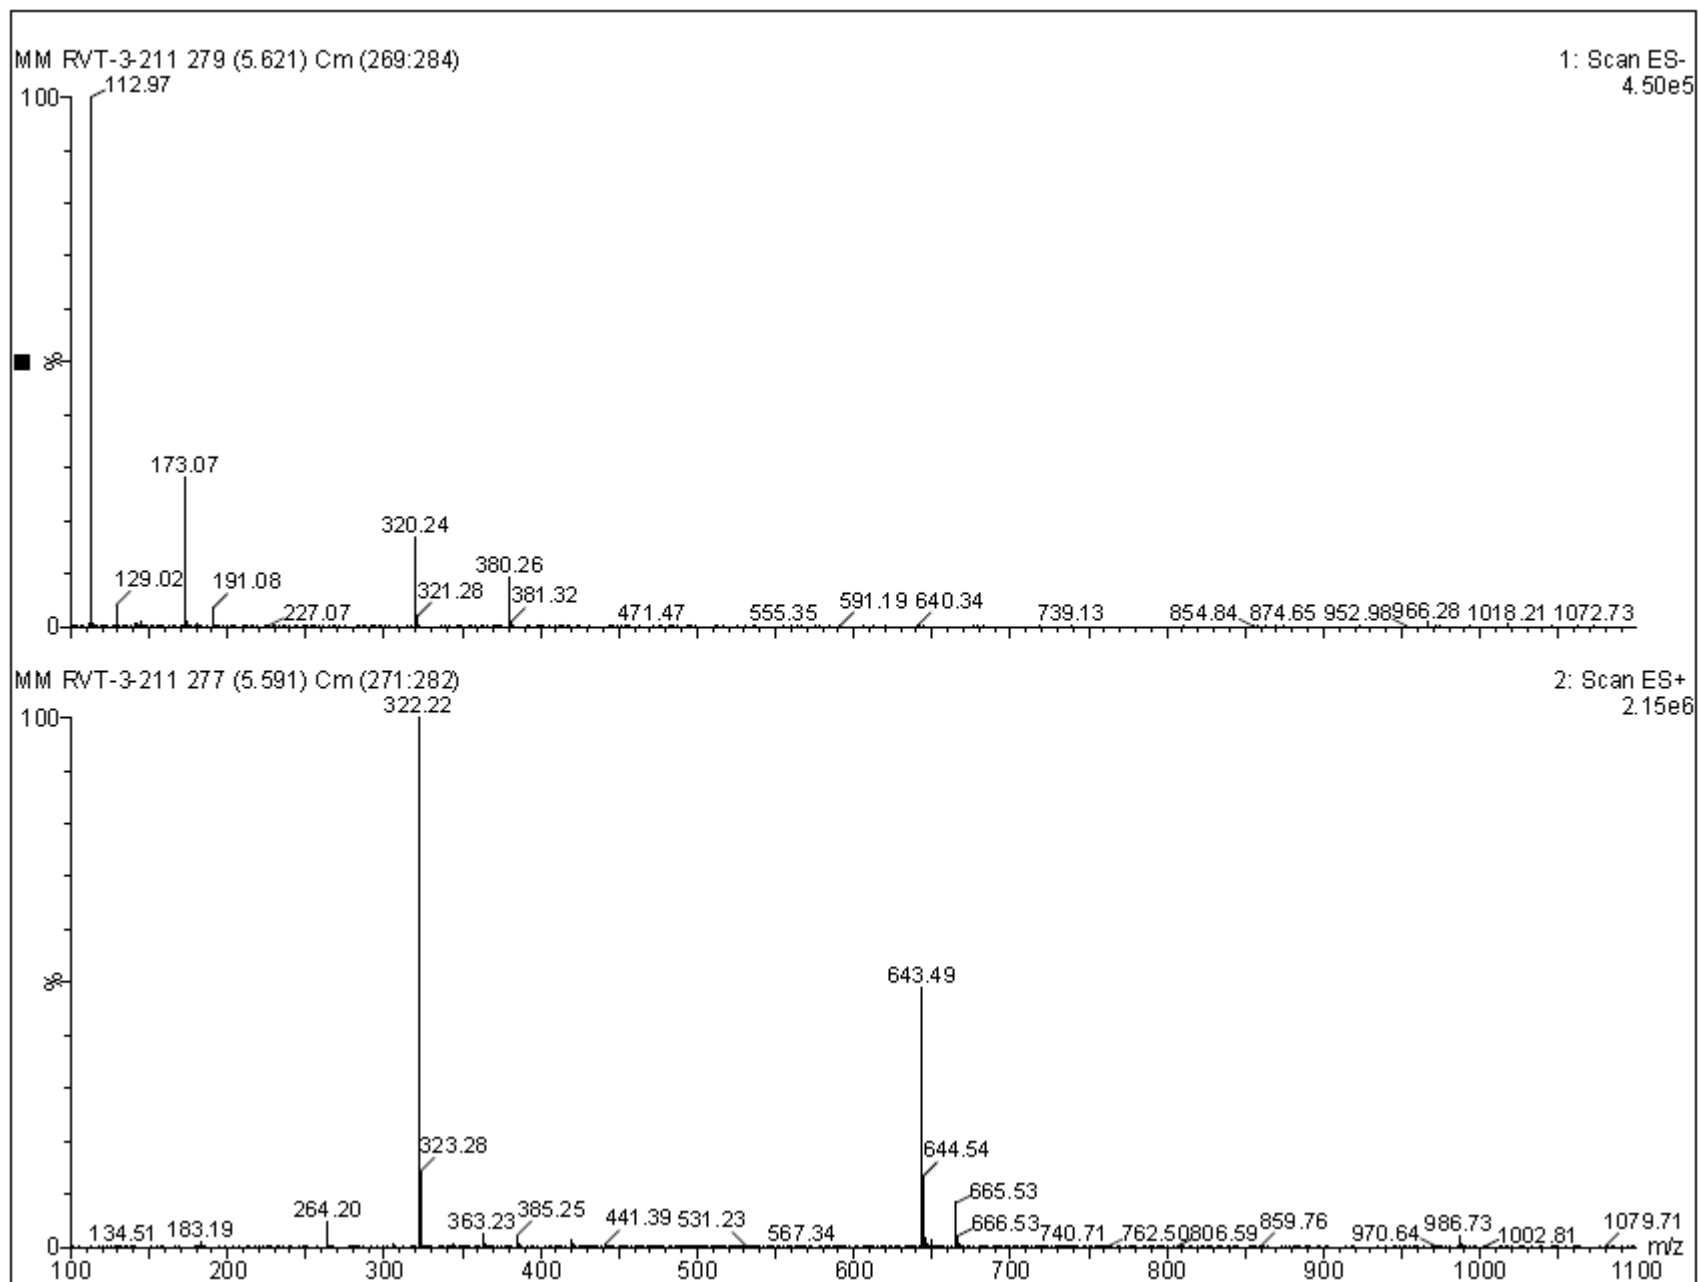

Cell culture experiments of compounds 12

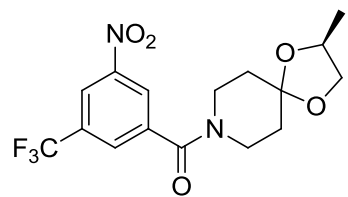

**12**

Molecular Weight: 374.31

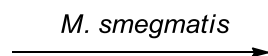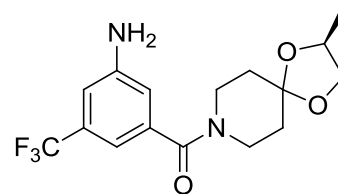

**18**

Molecular Weight: 344.33

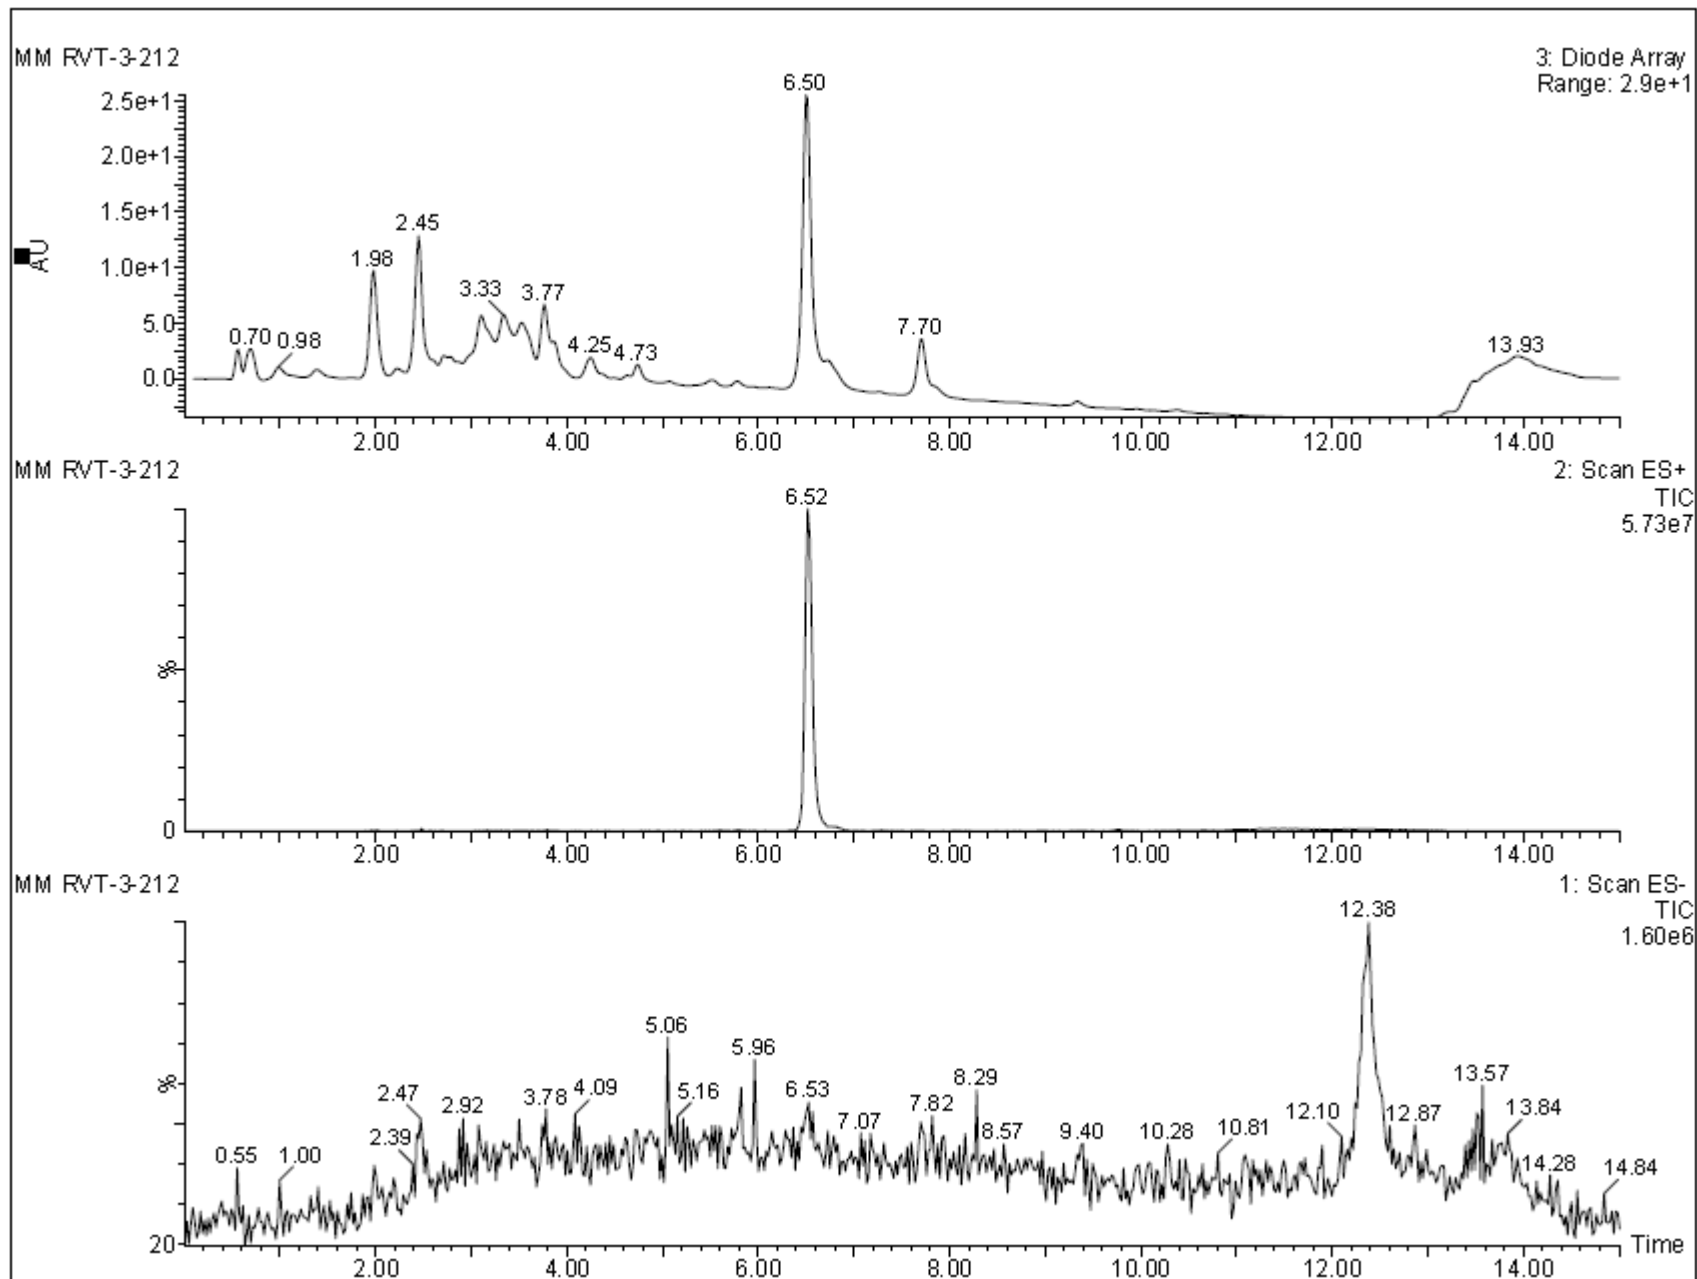

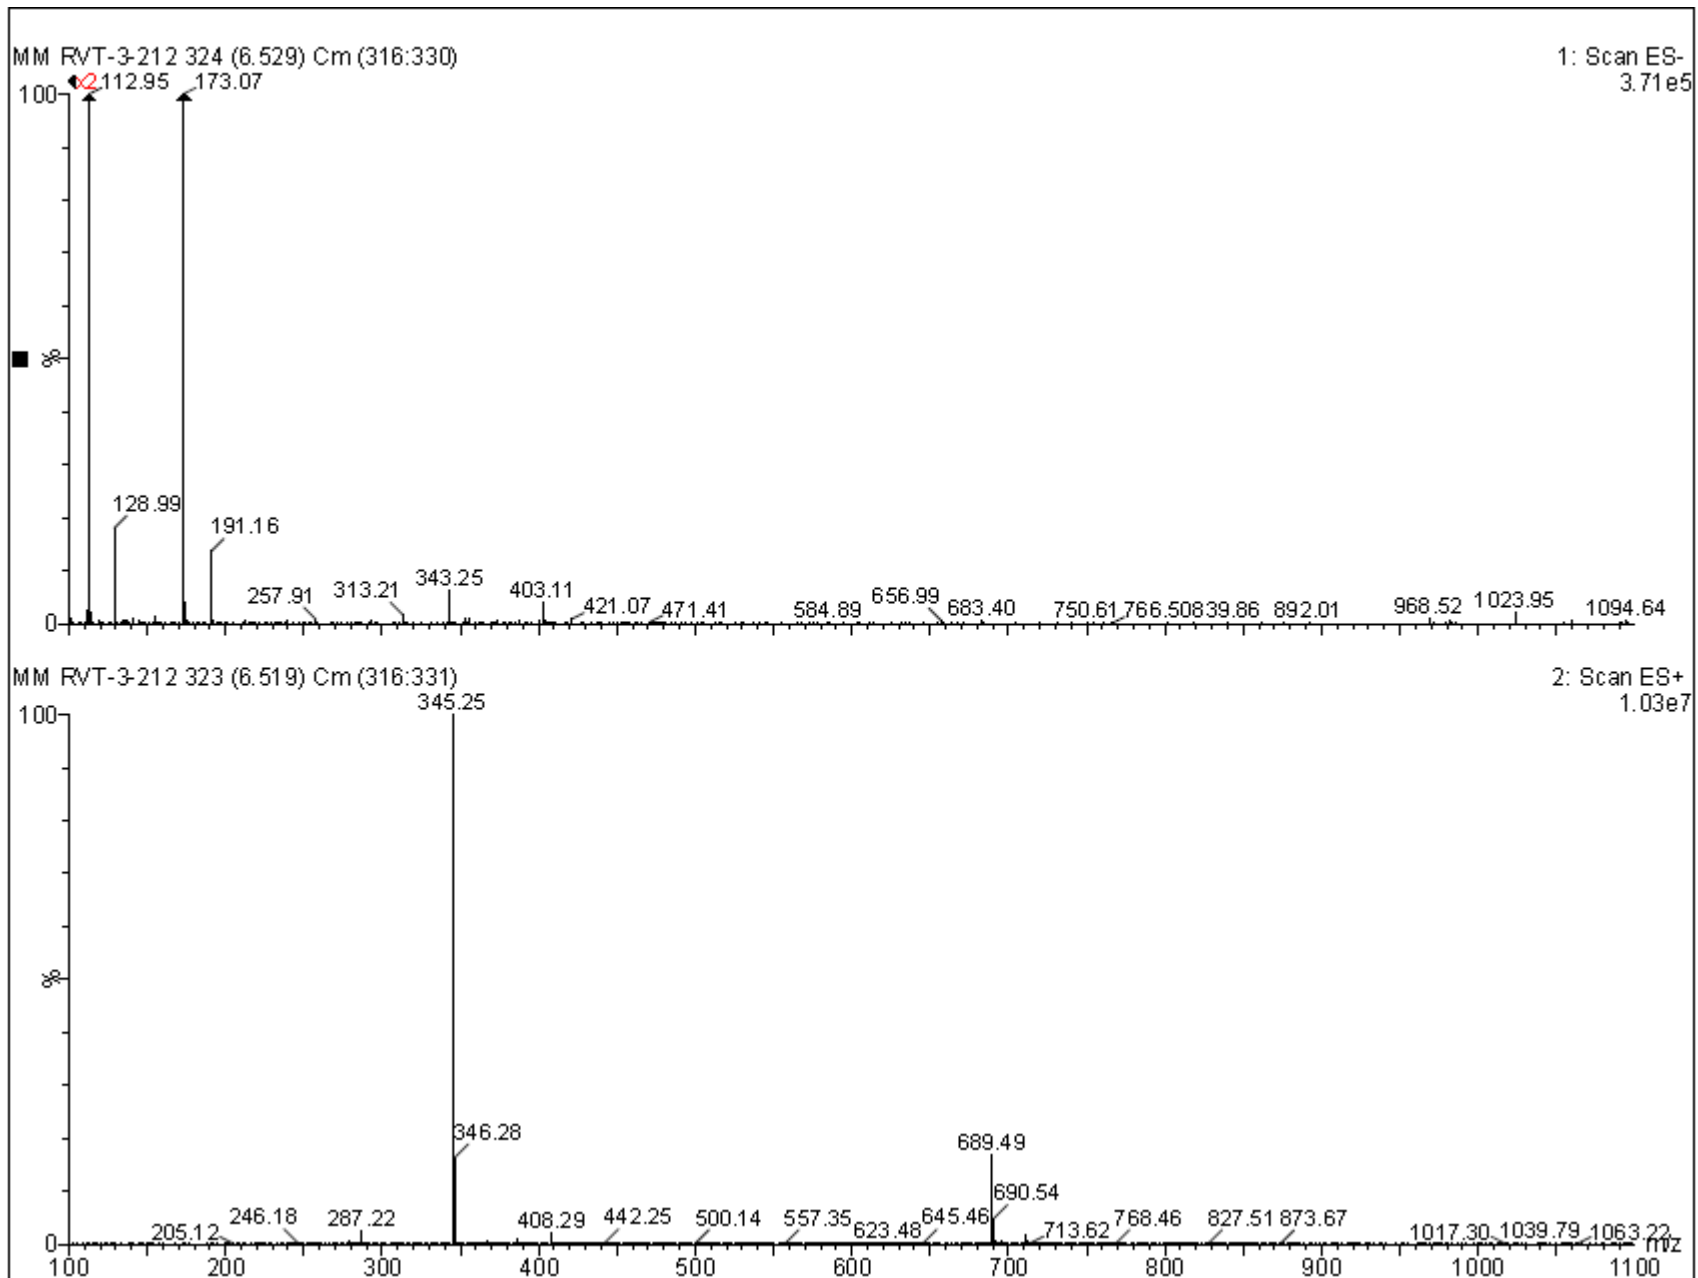

Reaction of **11** with sodium methane thiolates (Scheme 4). The structures of the products identified by LC/MS are shown along with the UV trace of the reaction.

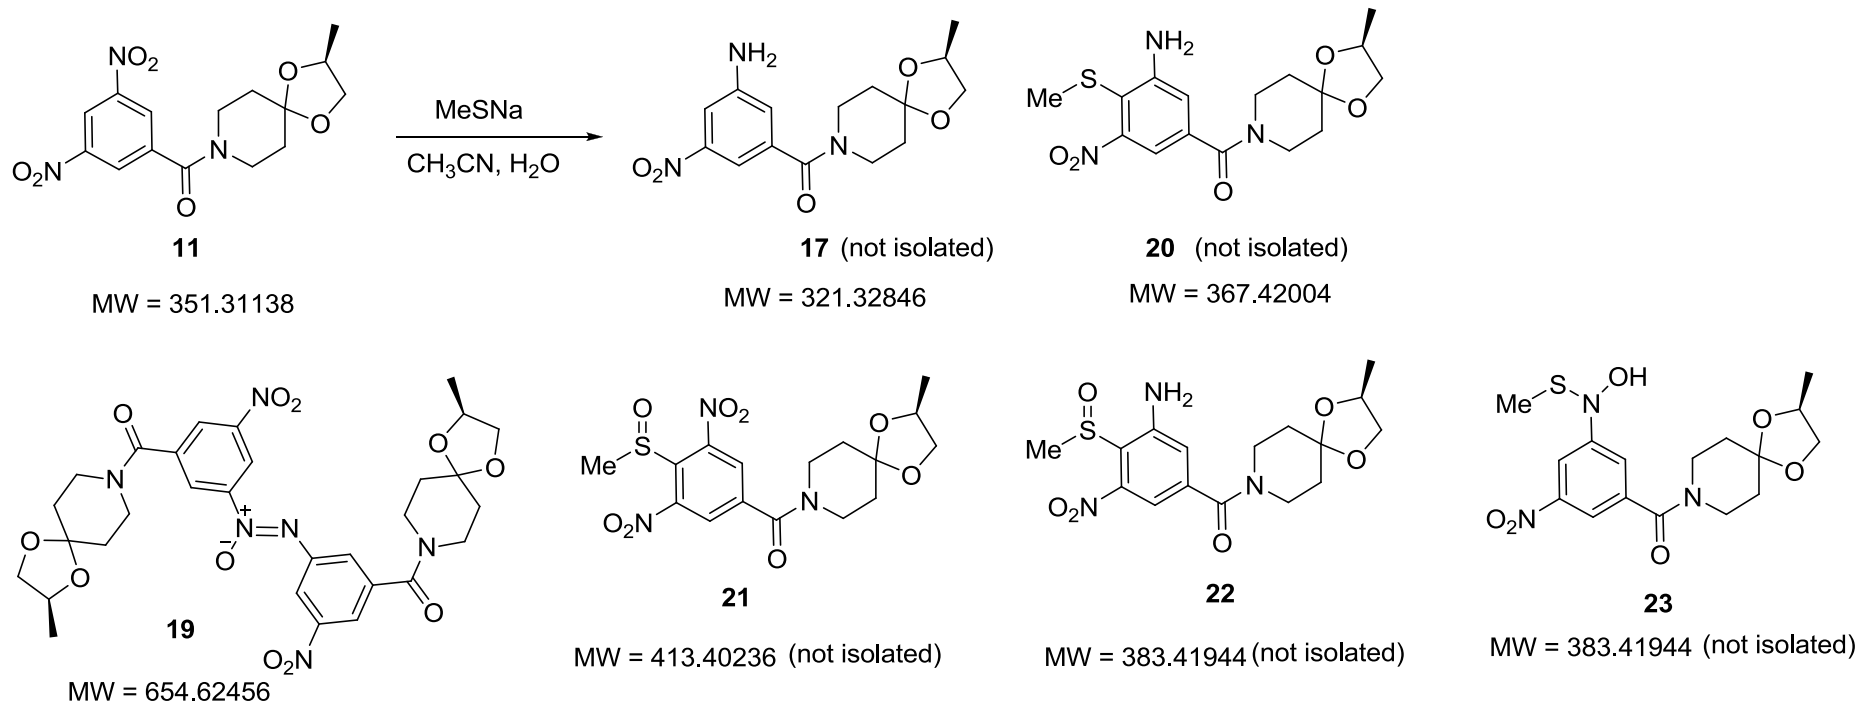

Chromatogram for the reaction of **11** with sodium methane thiolates (Scheme 4).

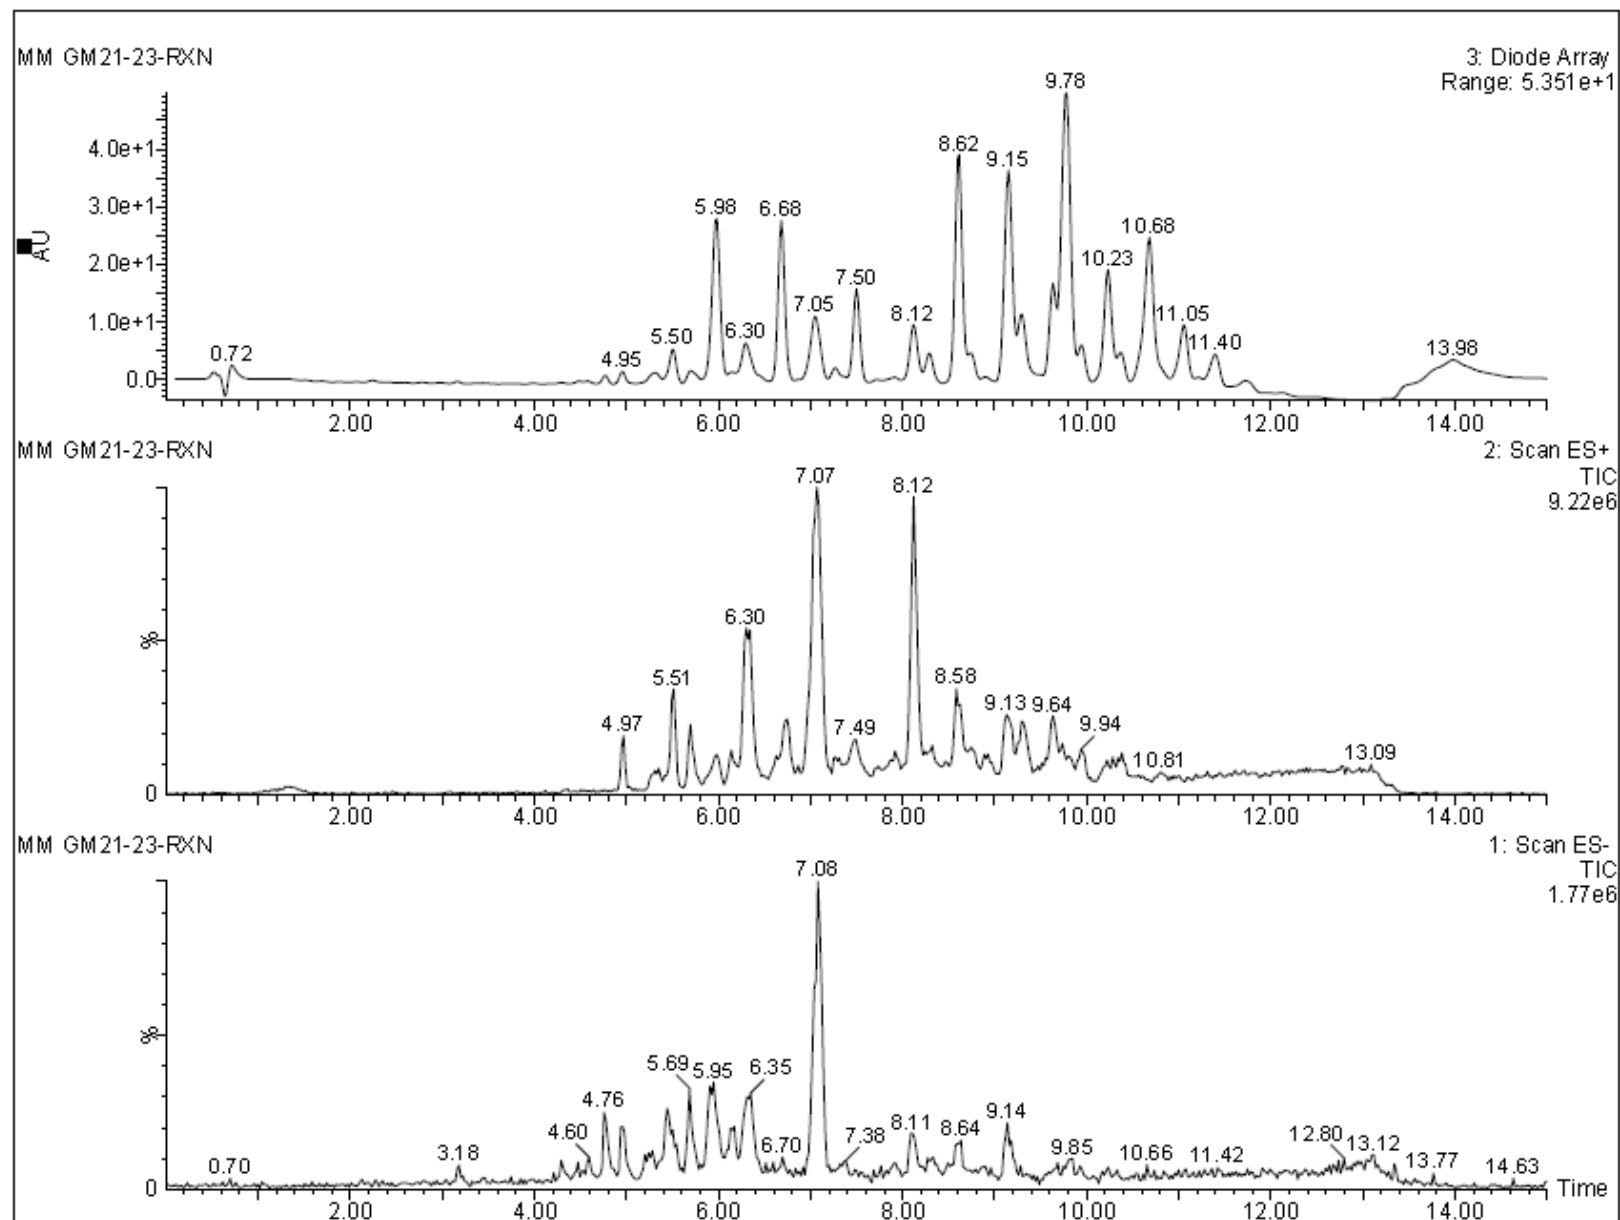



The mass spectra of the reaction of **11** with sodium methane thiolate in positive ionization mode.

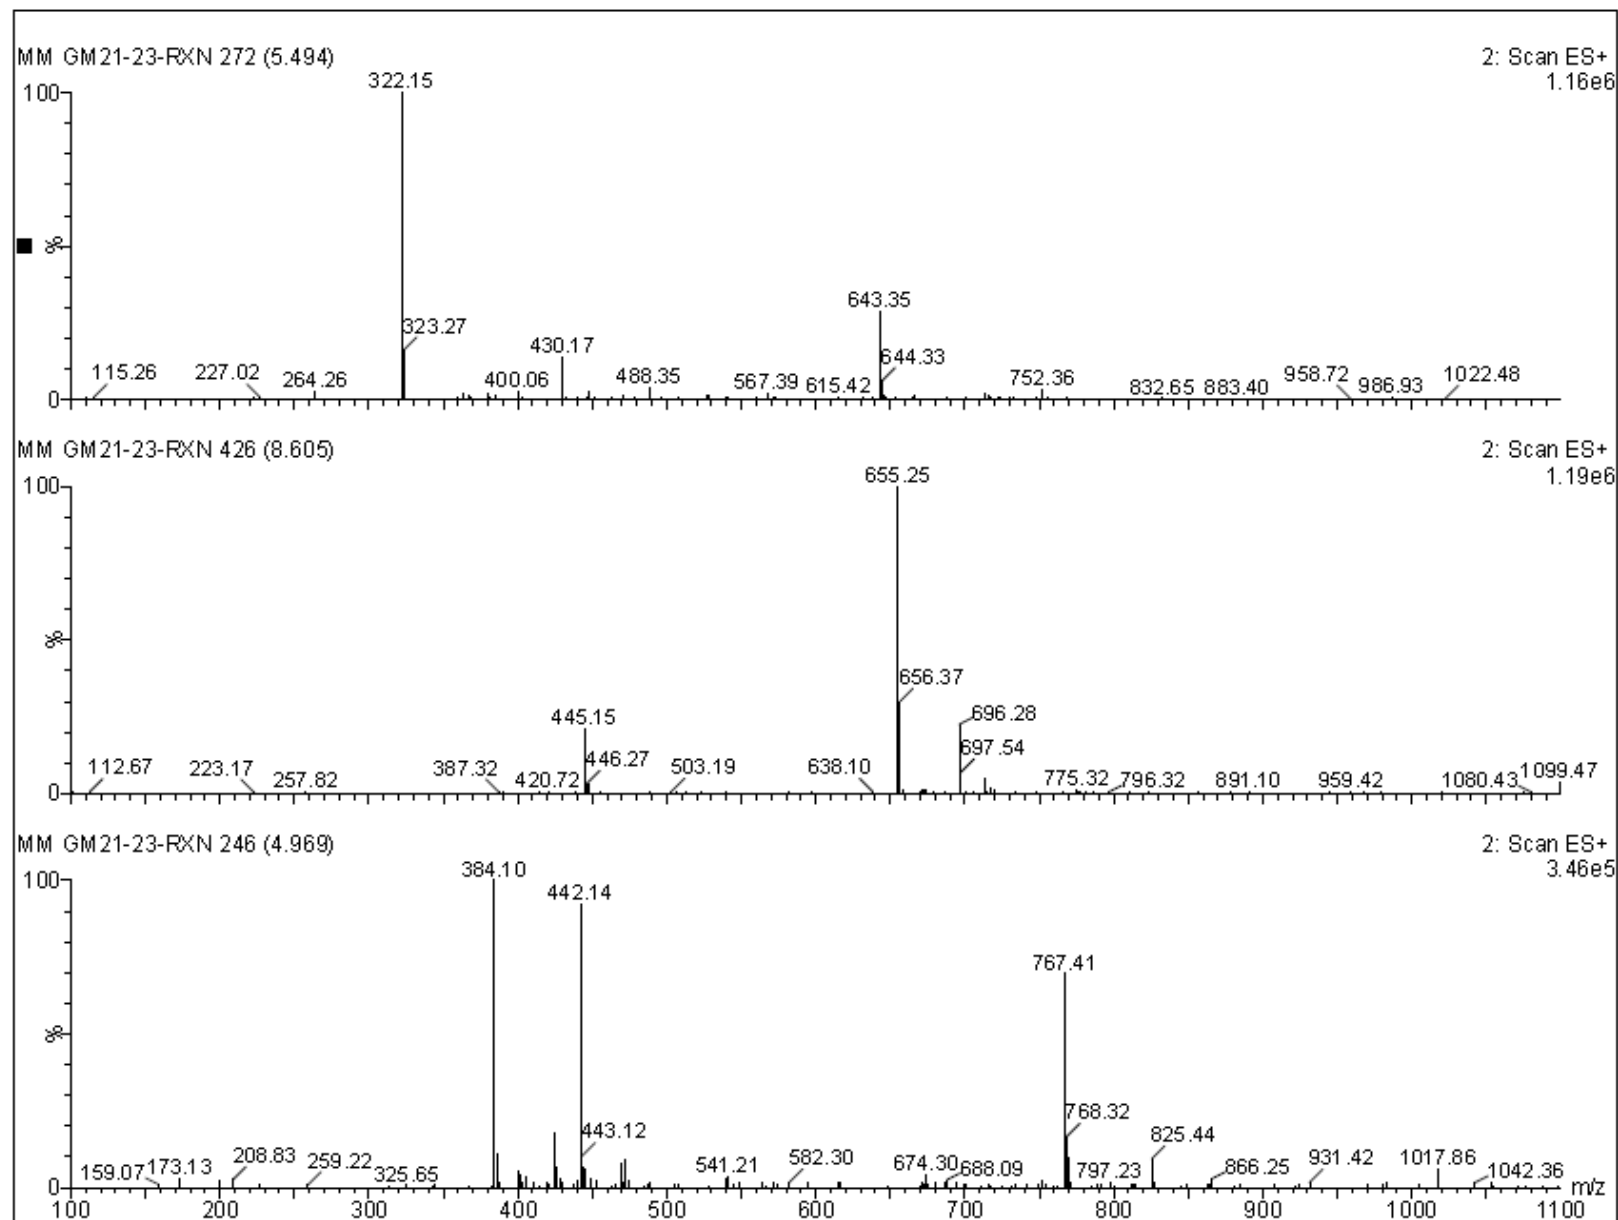

The mass spectra of the reaction of **11** with sodium methane thiolate in negative ionization mode.

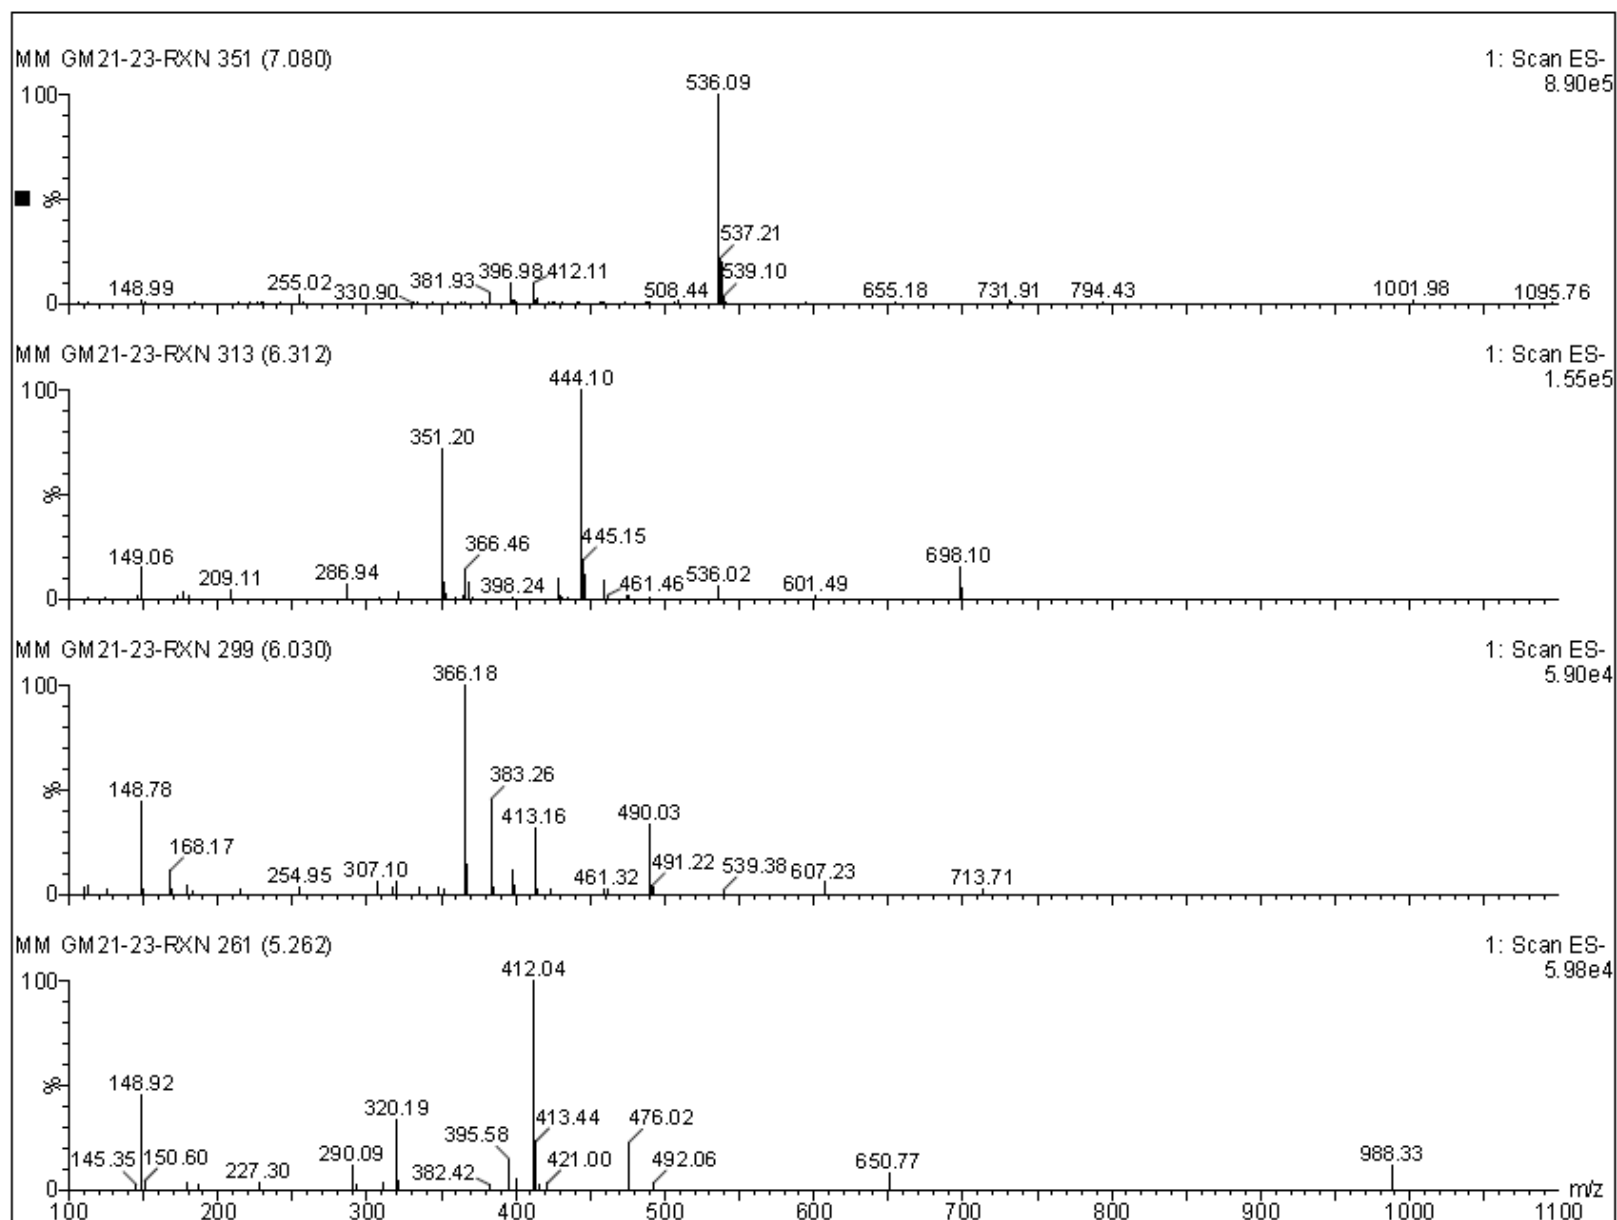

Reaction of 11 with Boc-cysteine

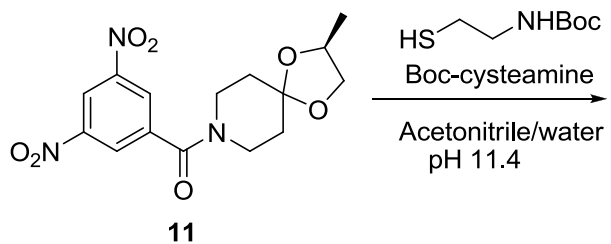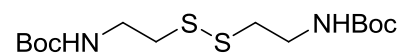

**18**

Chemical Formula: C<sub>14</sub>H<sub>28</sub>N<sub>2</sub>O<sub>4</sub>S<sub>2</sub>

Exact Mass: 352.14905

Molecular Weight: 352.51312

+

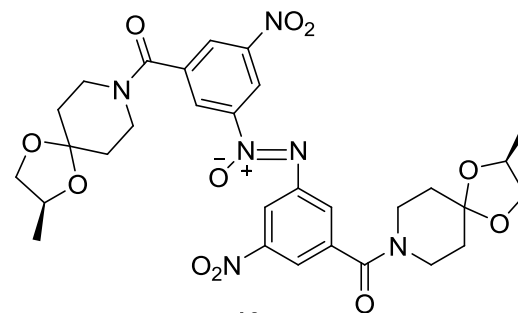

**19**

Chemical Formula: C<sub>30</sub>H<sub>34</sub>N<sub>6</sub>O<sub>11</sub>

Exact Mass: 654.22856

Molecular Weight: 654.62456

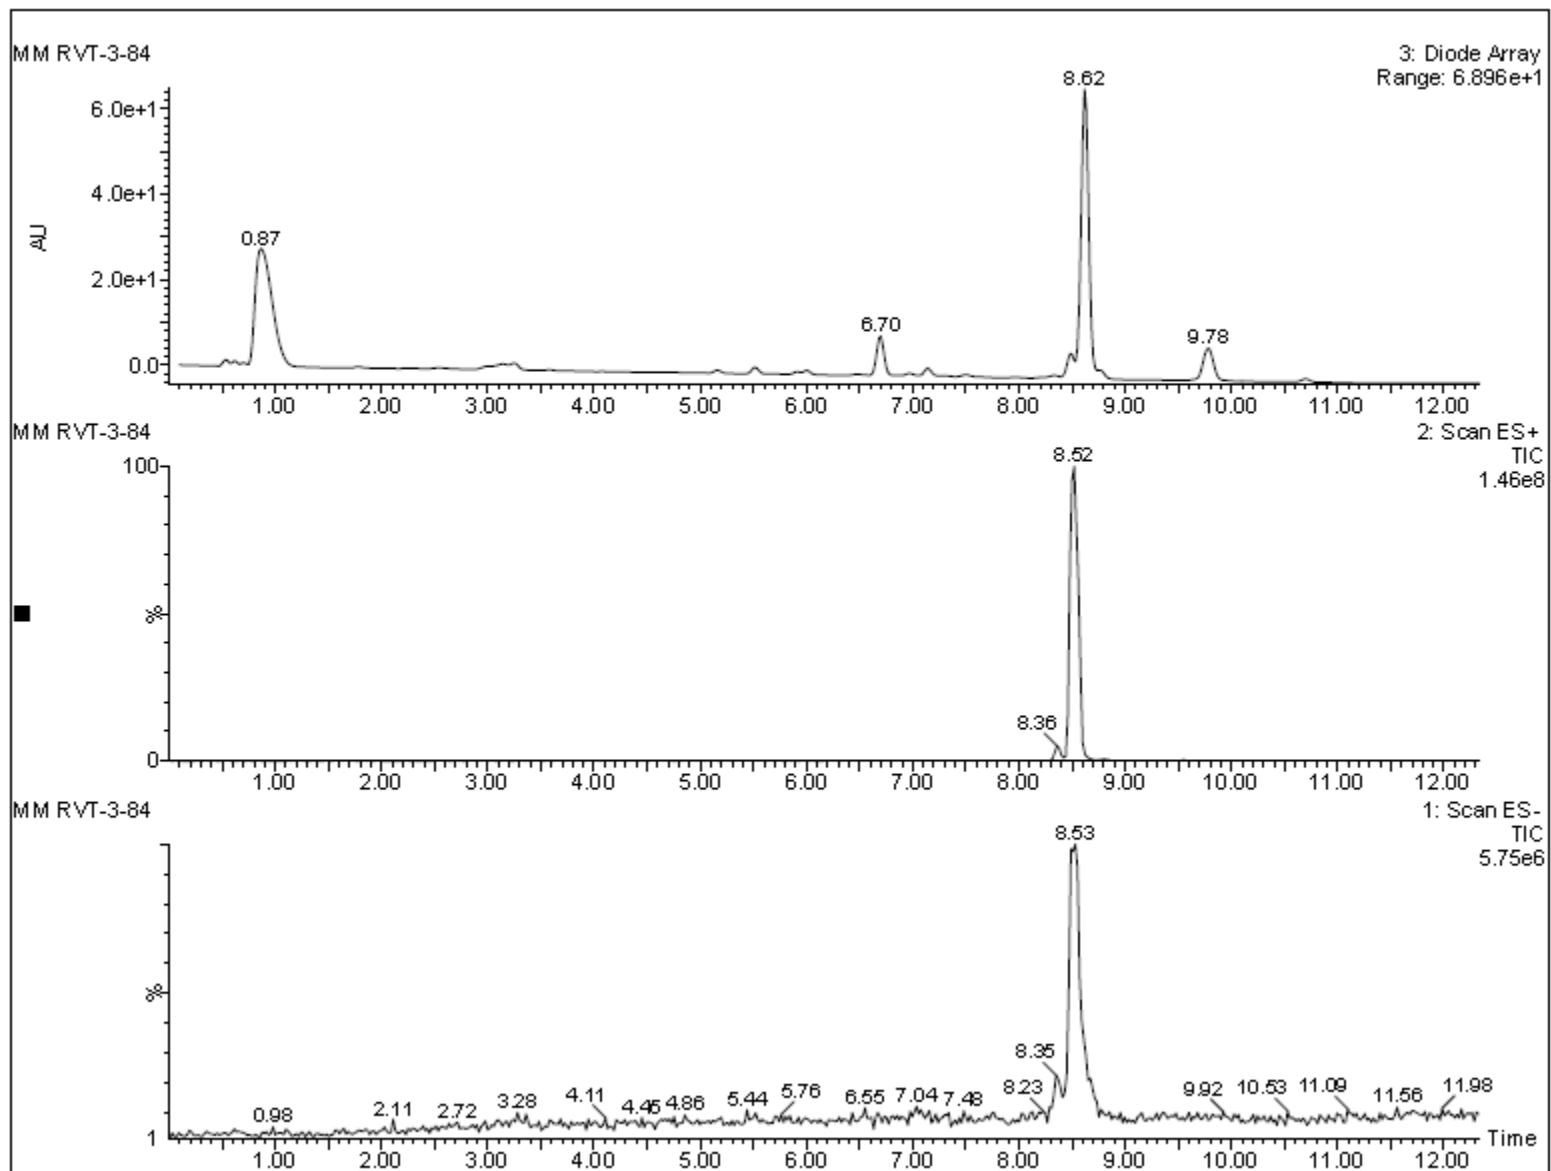

Mass spectra in the positive and the negative ionization mode.

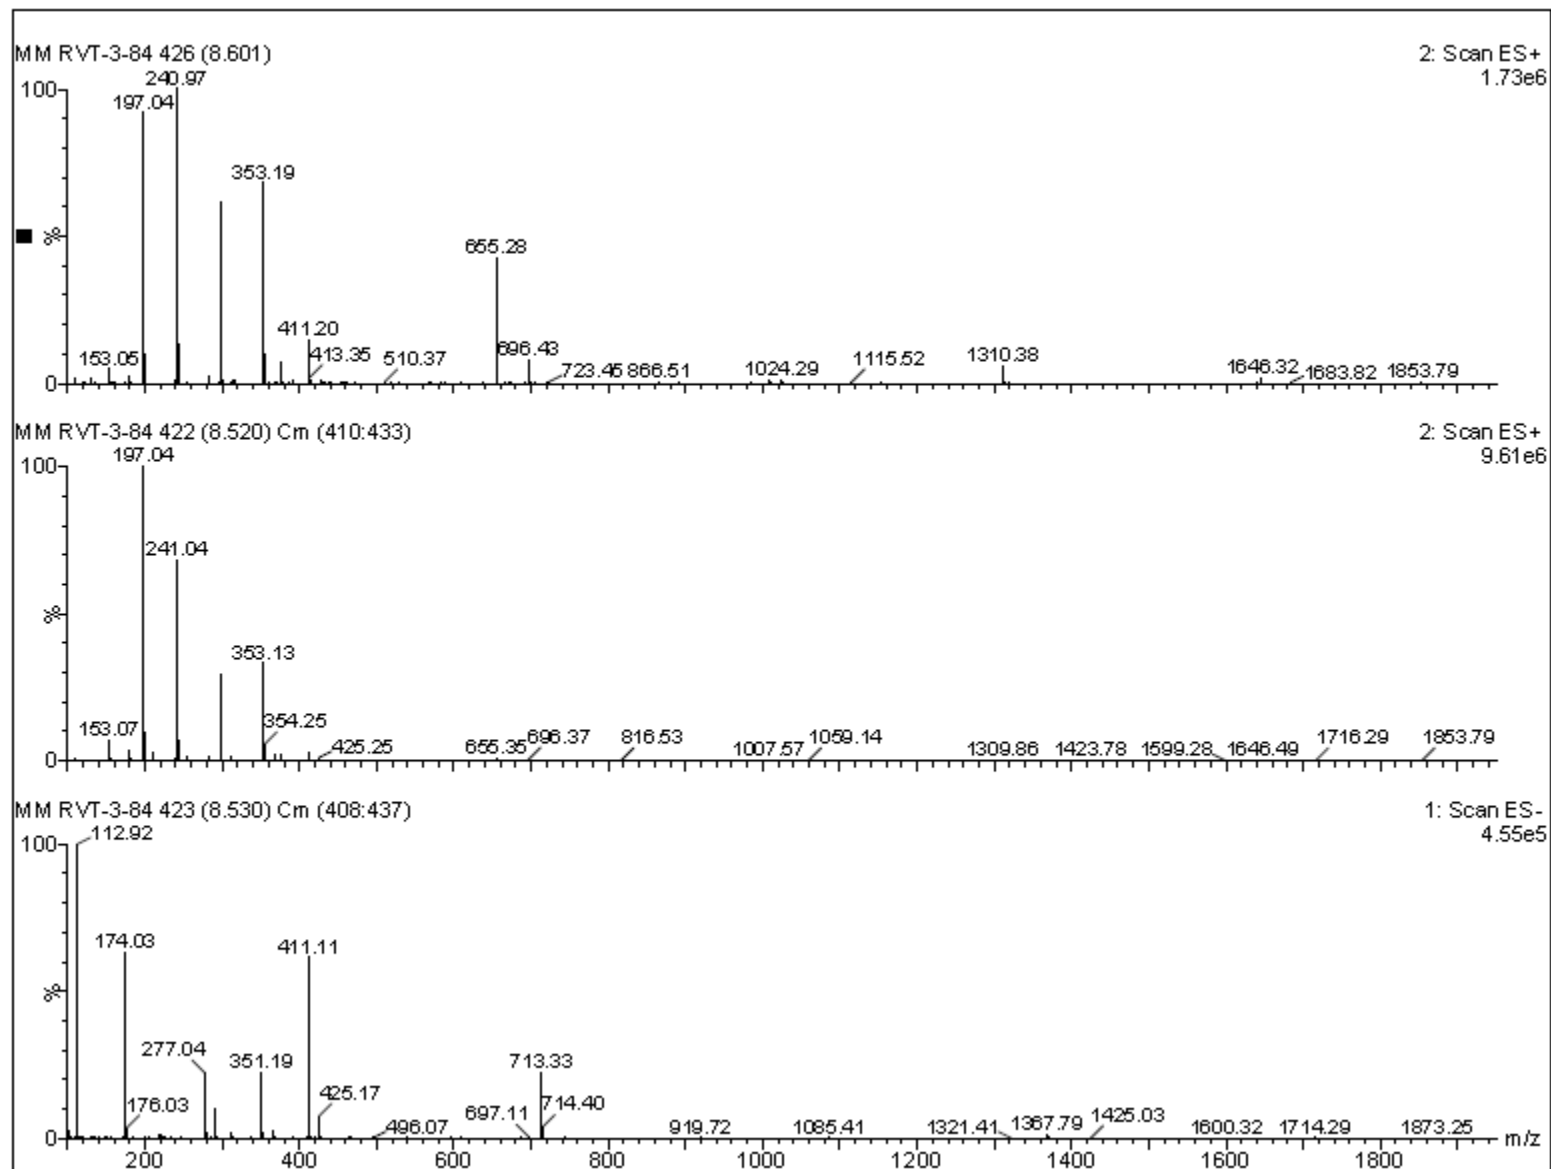

Reaction of **11** with ethane thiol at apparent pH 10-11. The starting material was completely disappeared after 7 h of reaction. Only hydroxylamine analogue (**41**) was detected under reaction condition. LC/MS is shown on the next page.

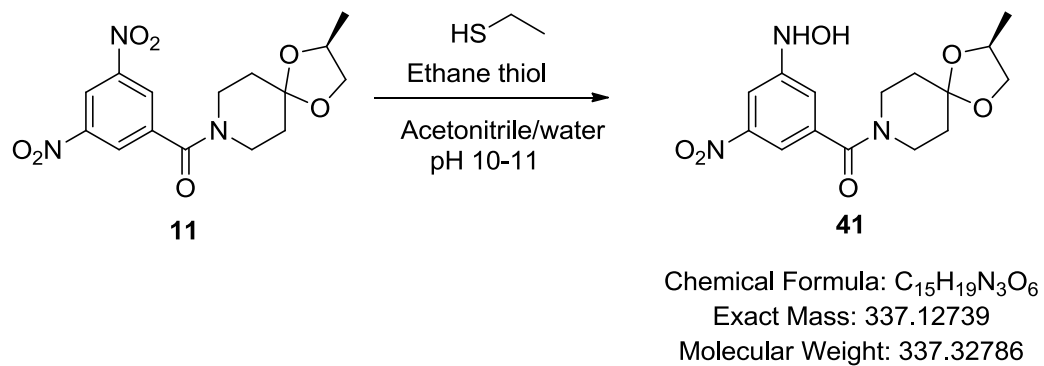

LC/MS

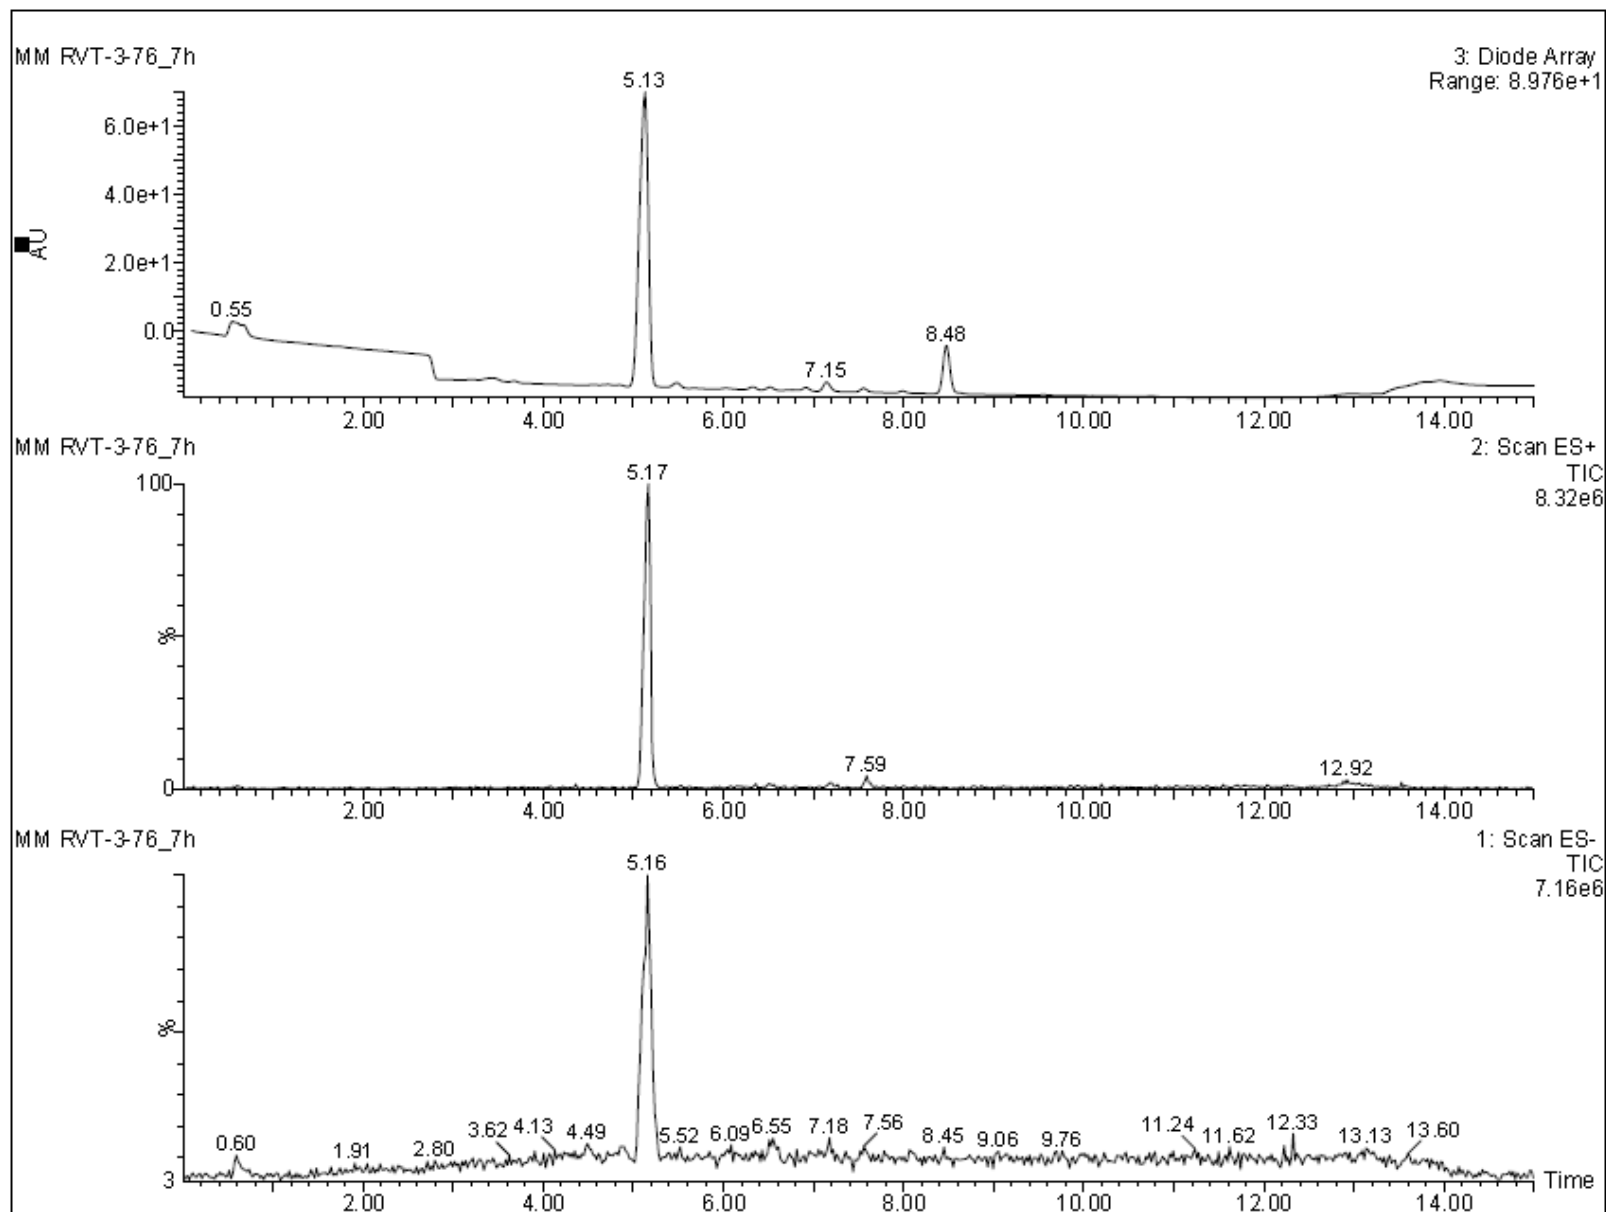

Mass spectra in the positive and the negative ionization mode

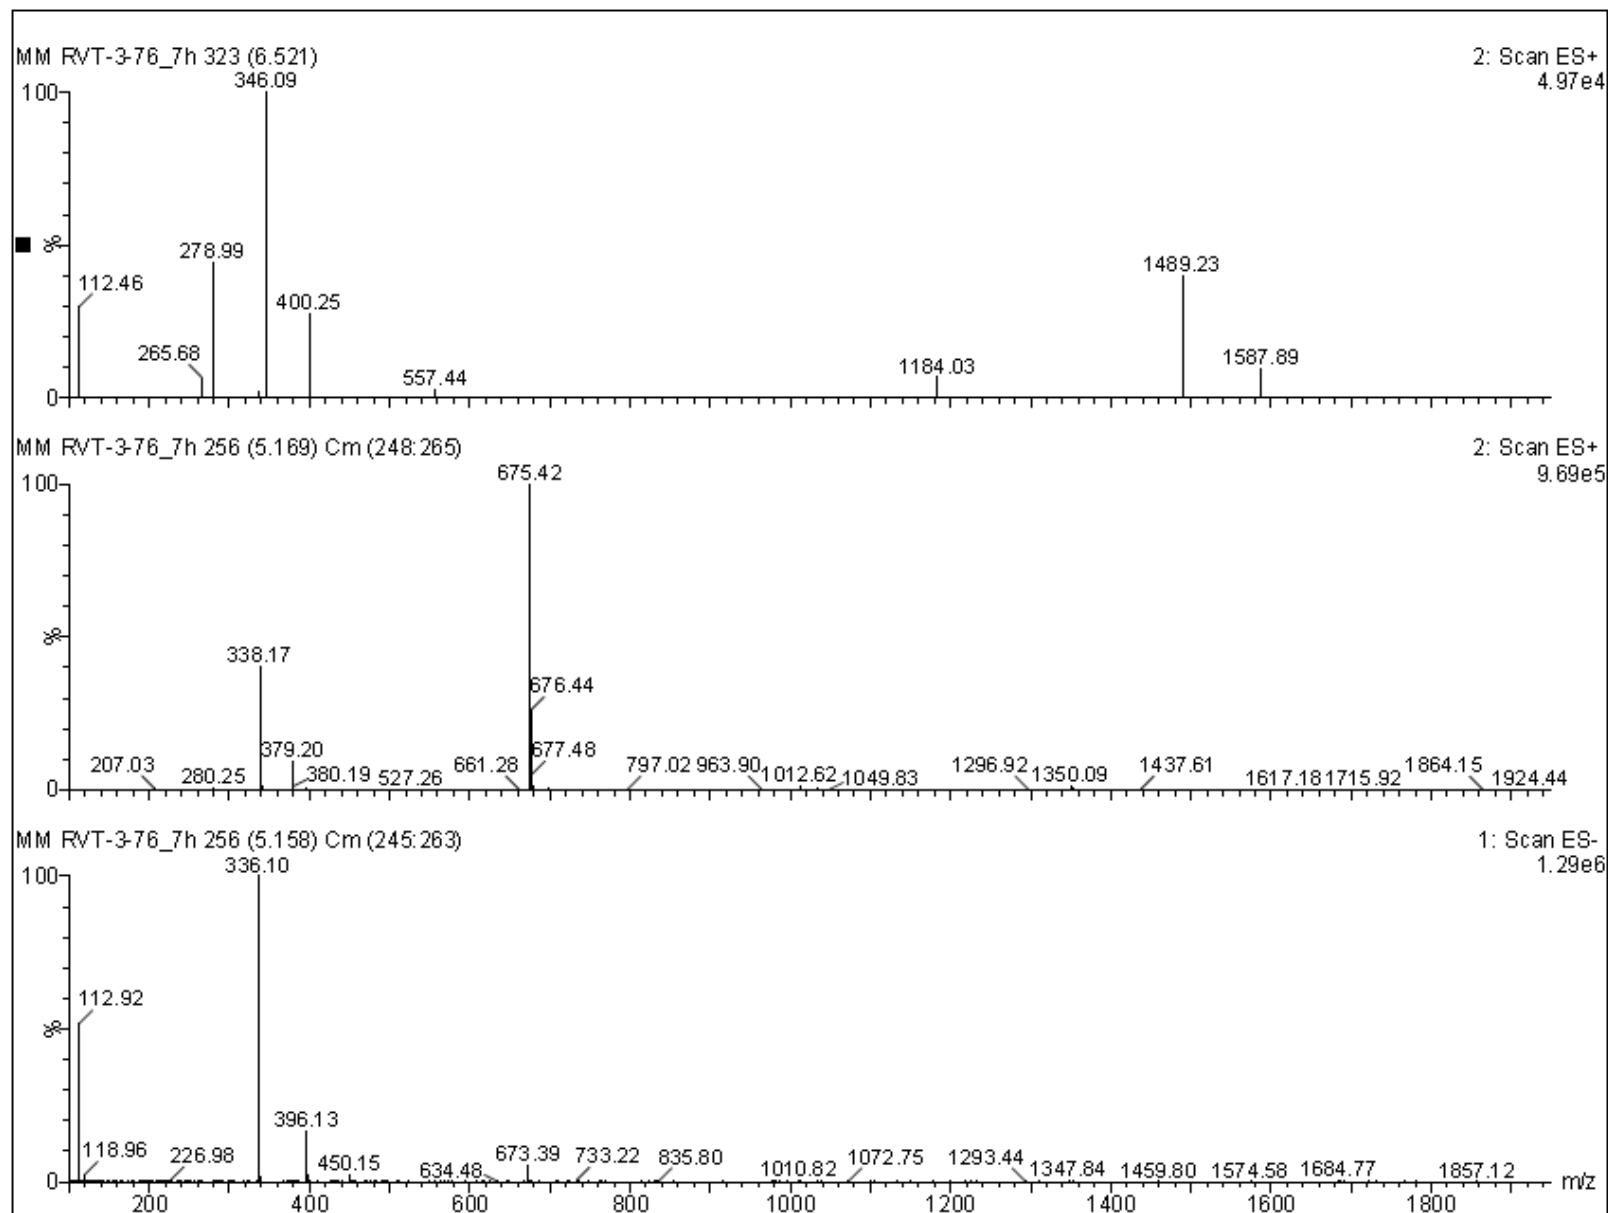



Reaction of **11** with thiophenol at apparent pH 11-12. The LC/MS of the reaction mixture indicated the formation of **42** and **19**.

LC/MS is shown on the next page

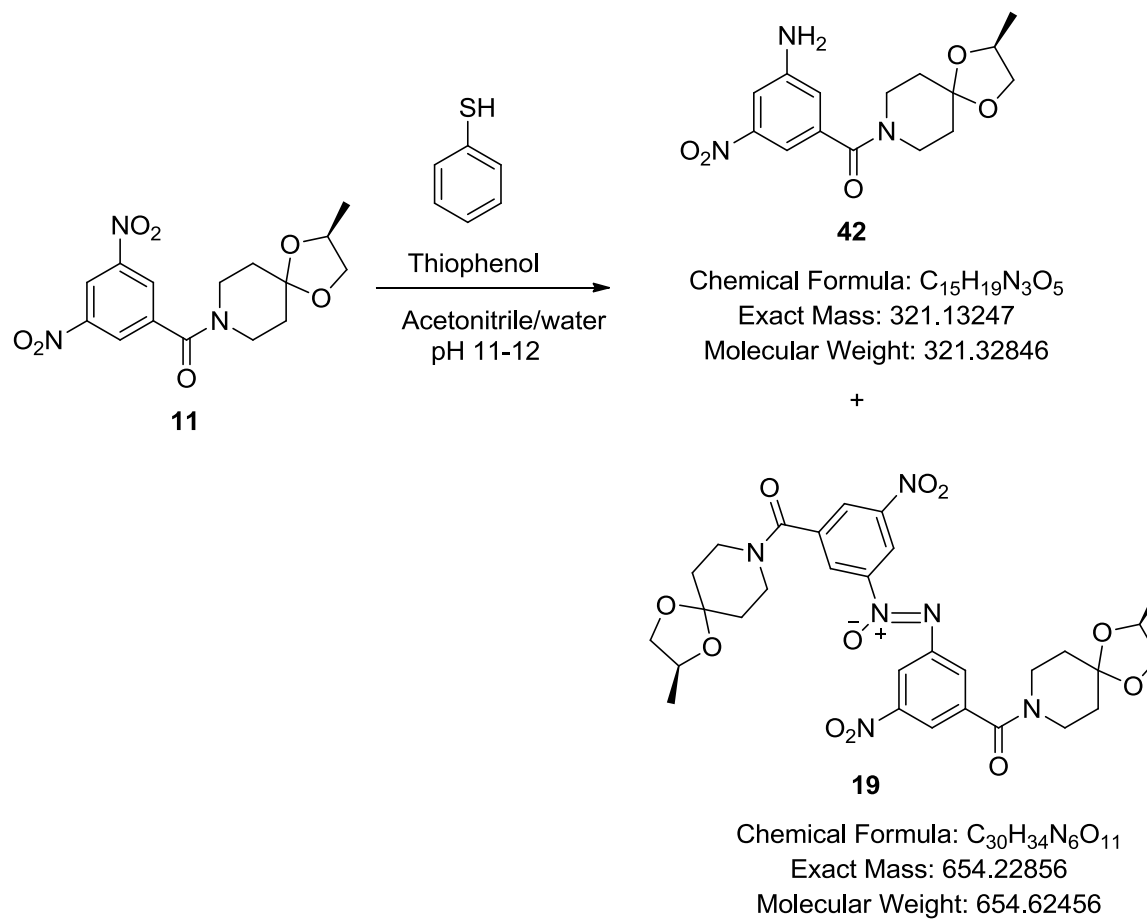

LC/MS

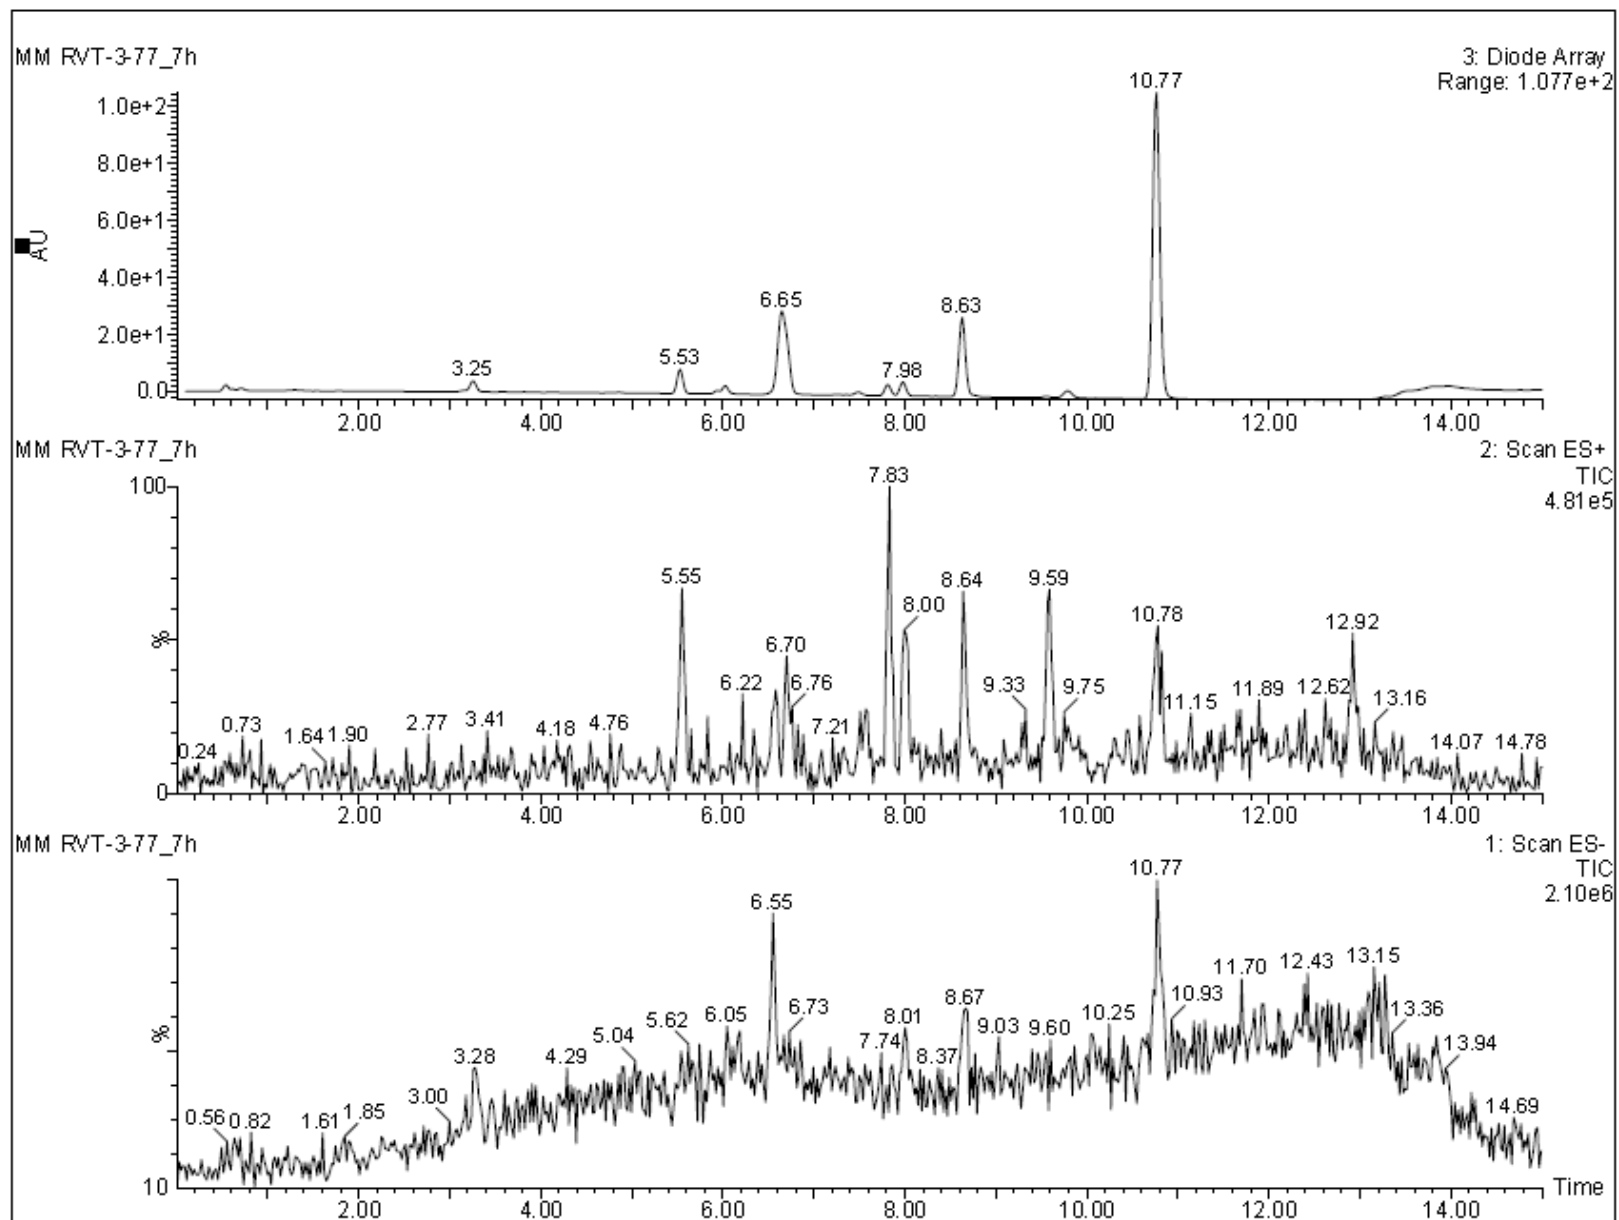

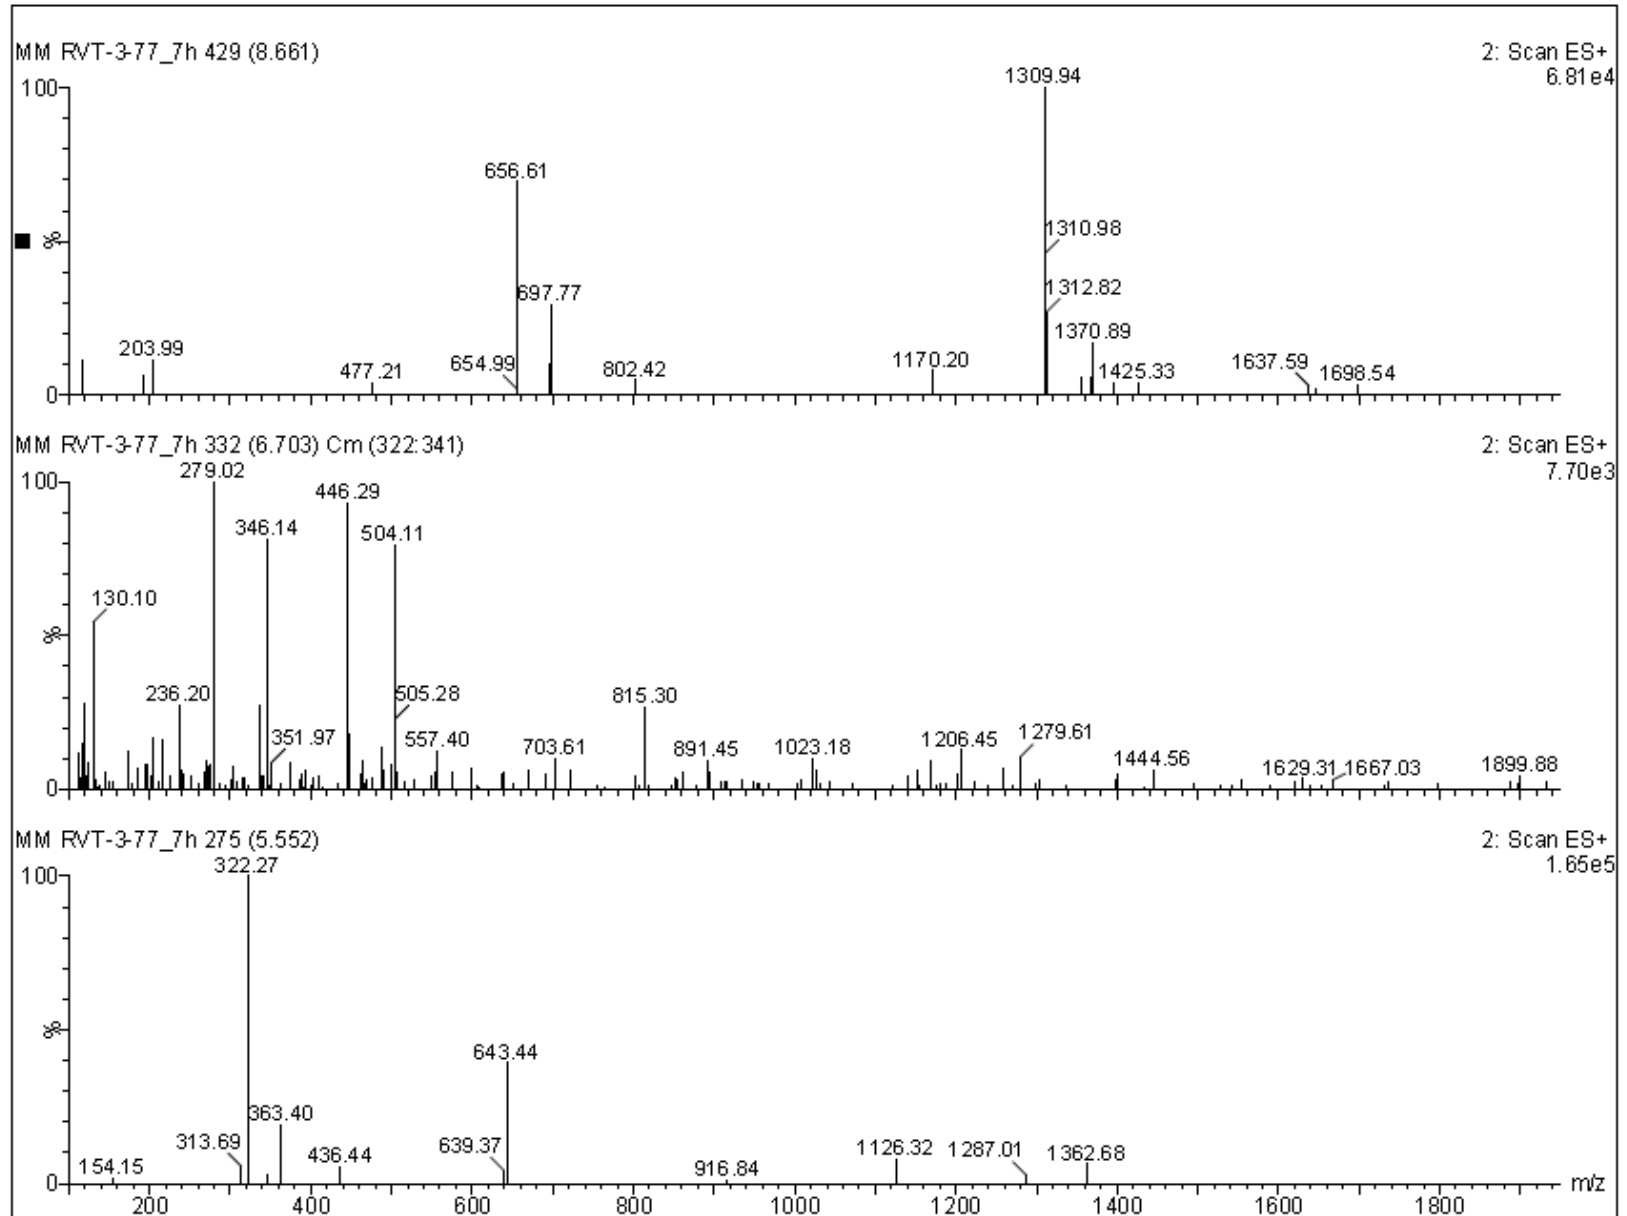

Reaction of **11** with Boc-cysteine at apparent pH 10-11. The LC/MS of the reaction mixture indicated the formation of the Boc-cysteine dimer (corresponding cysteine) and **19**. LC/MS is shown on the next page

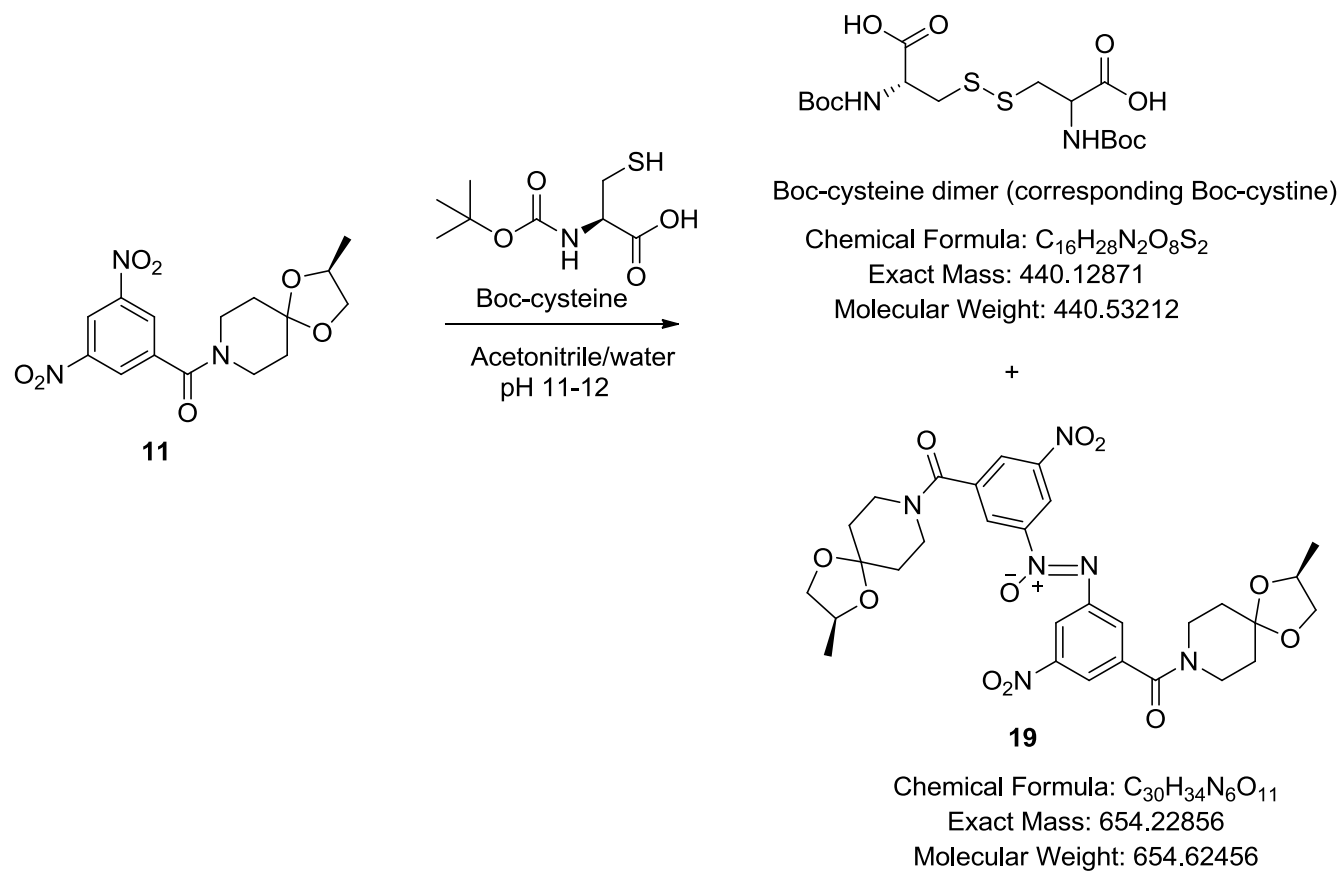

LC/MS

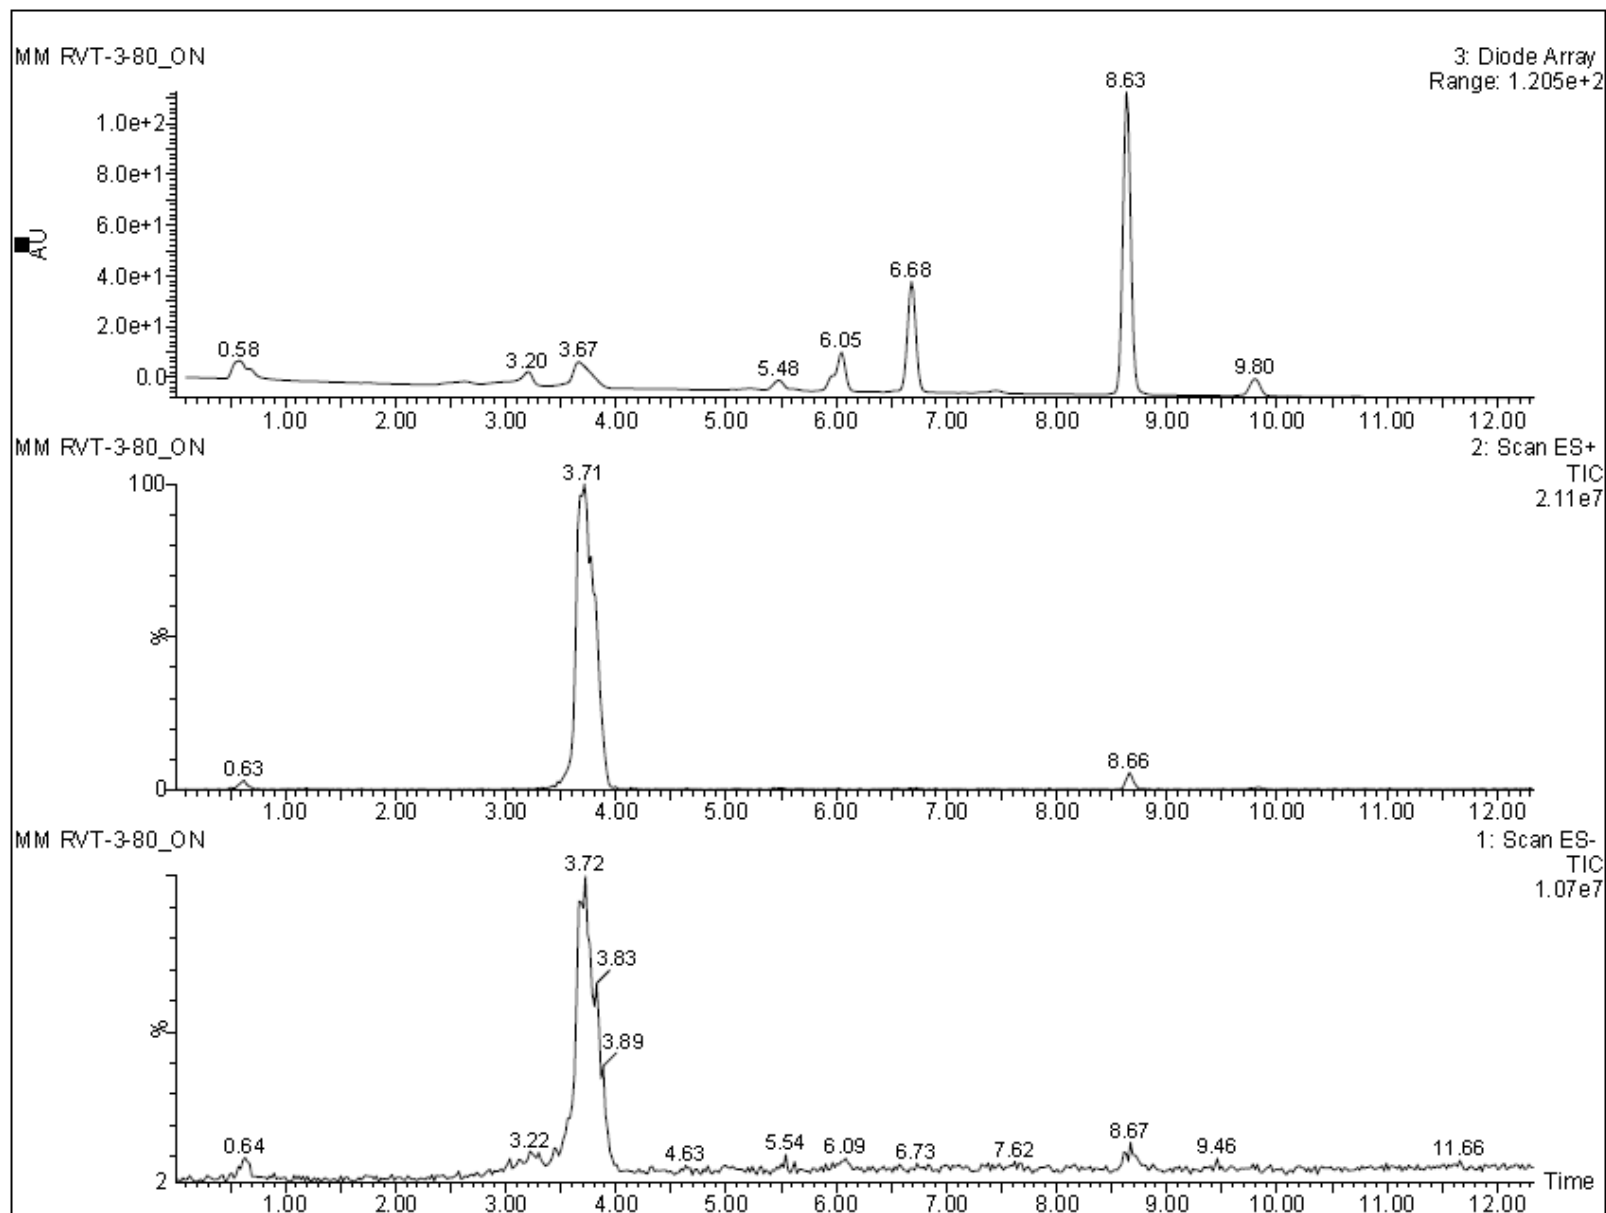

Mass spectra in the positive and the negative ionization mode

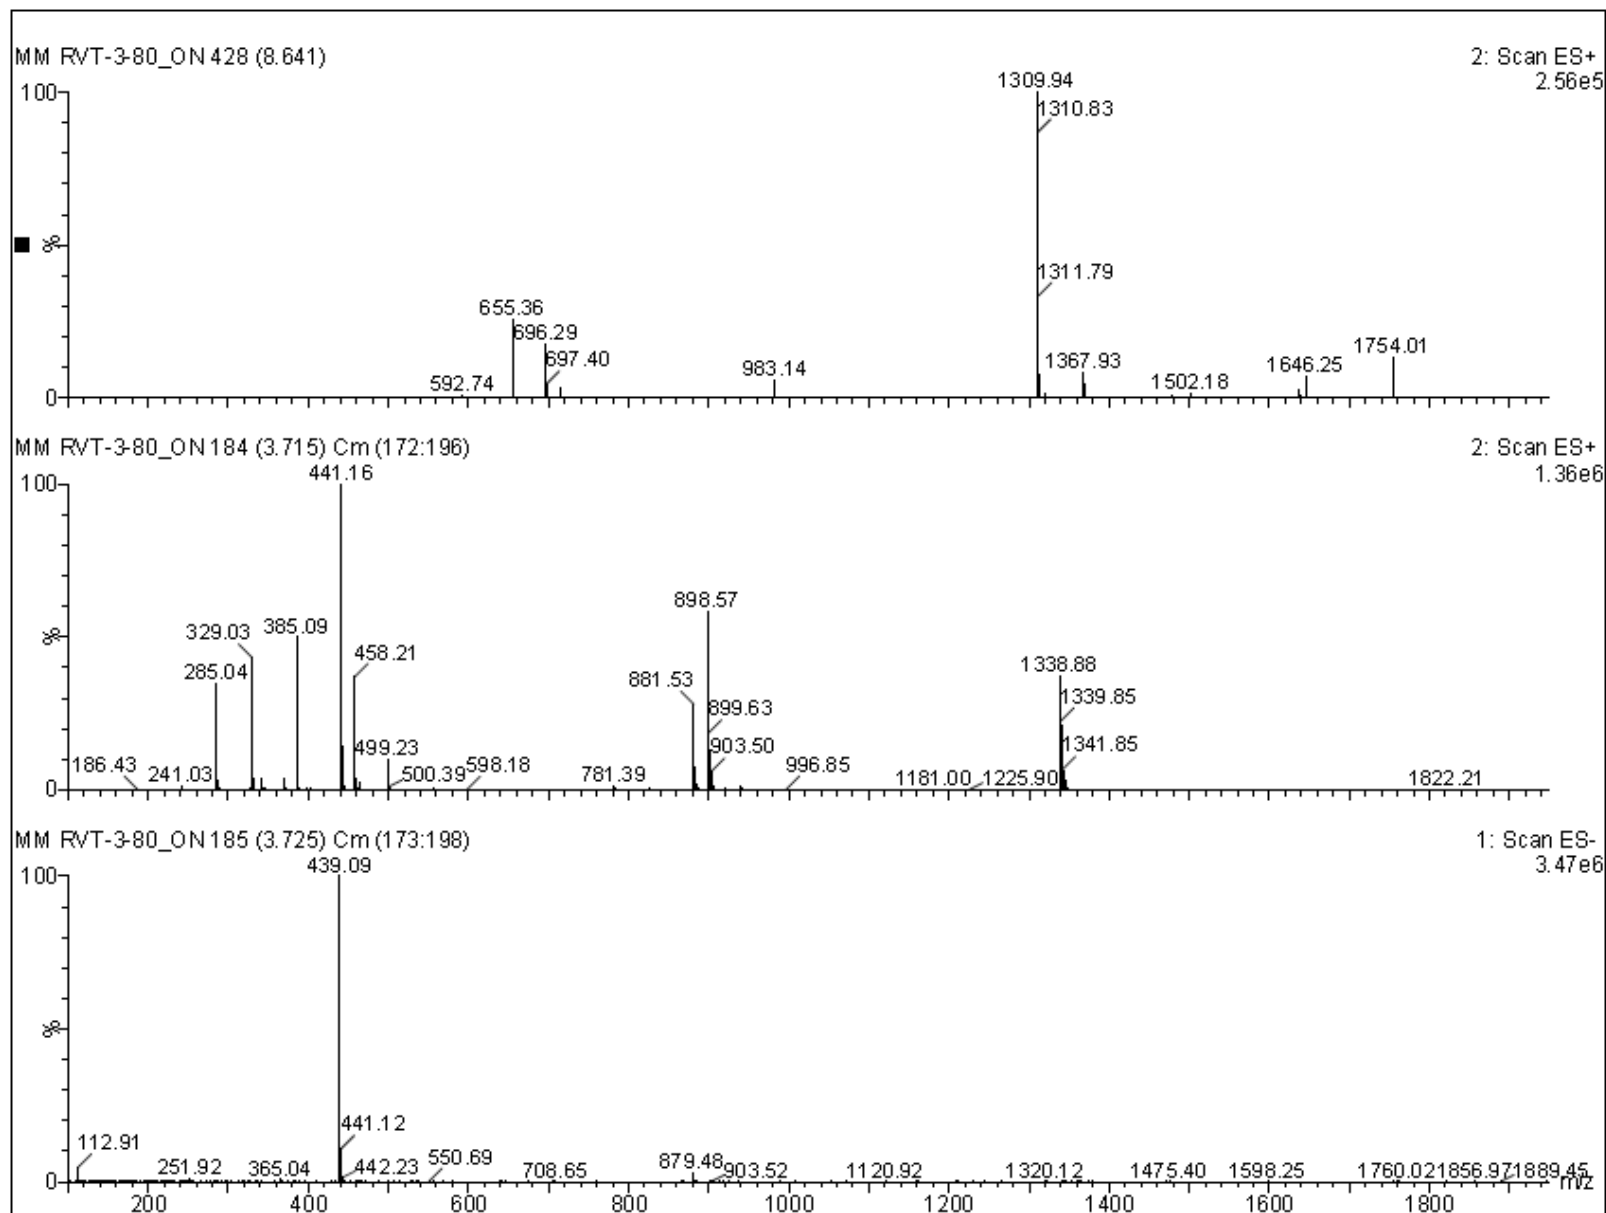

Reaction of 4-methyl analog of **11** (compound **39**) with sodium methane thiolate.

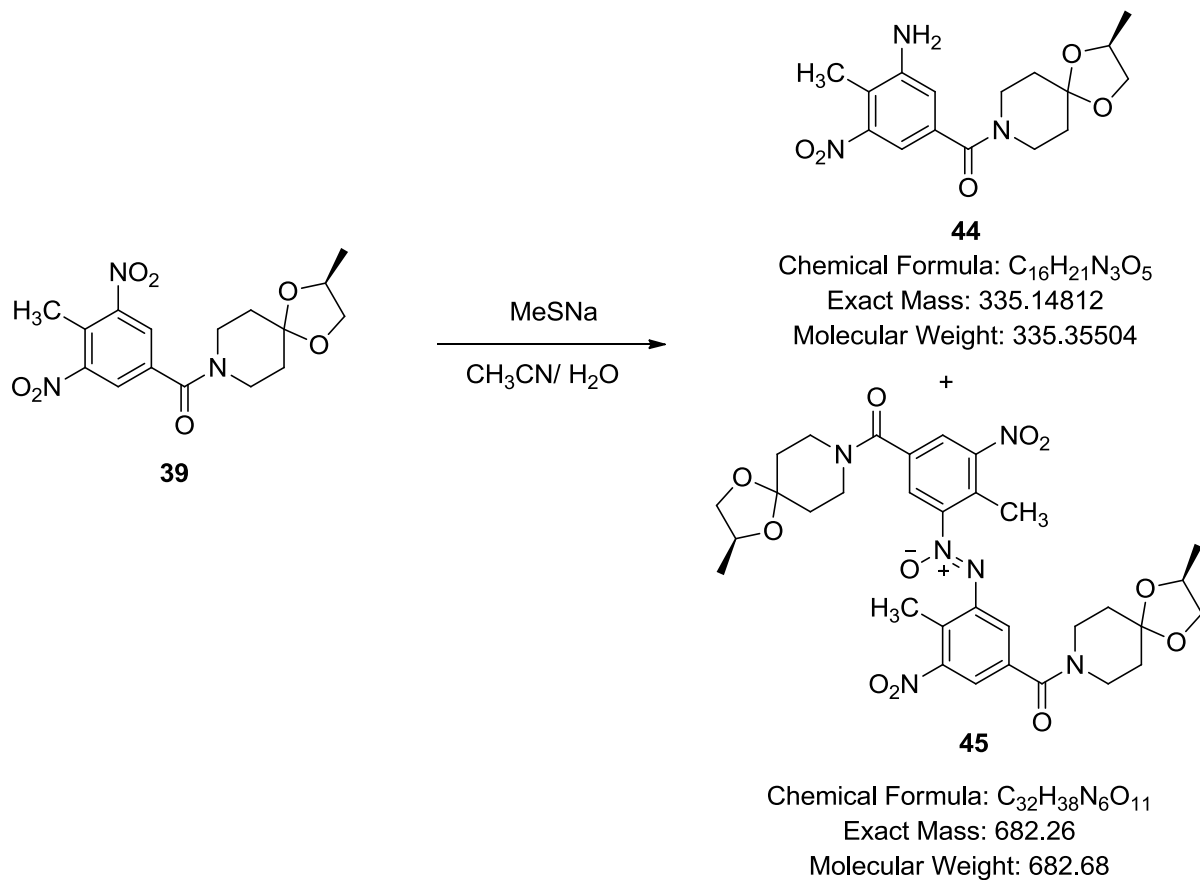

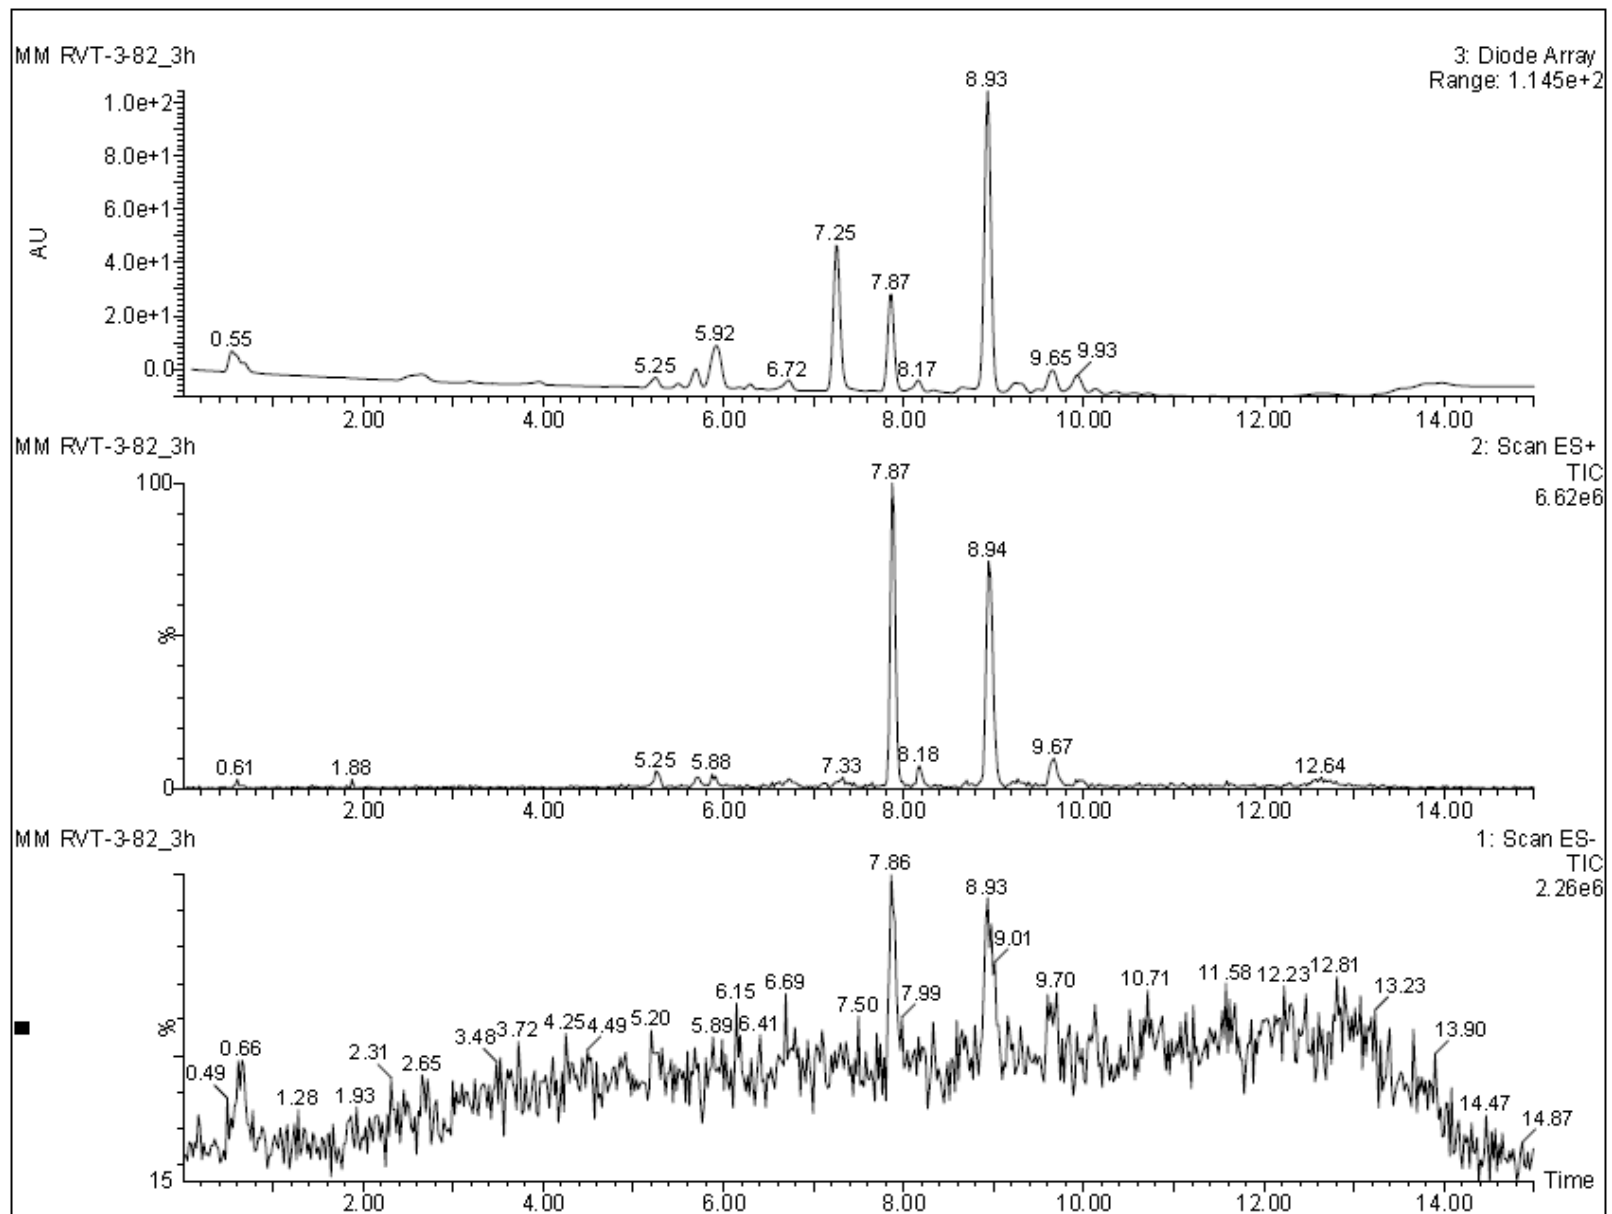



Mass spectra in the positive and the negative ionization mode

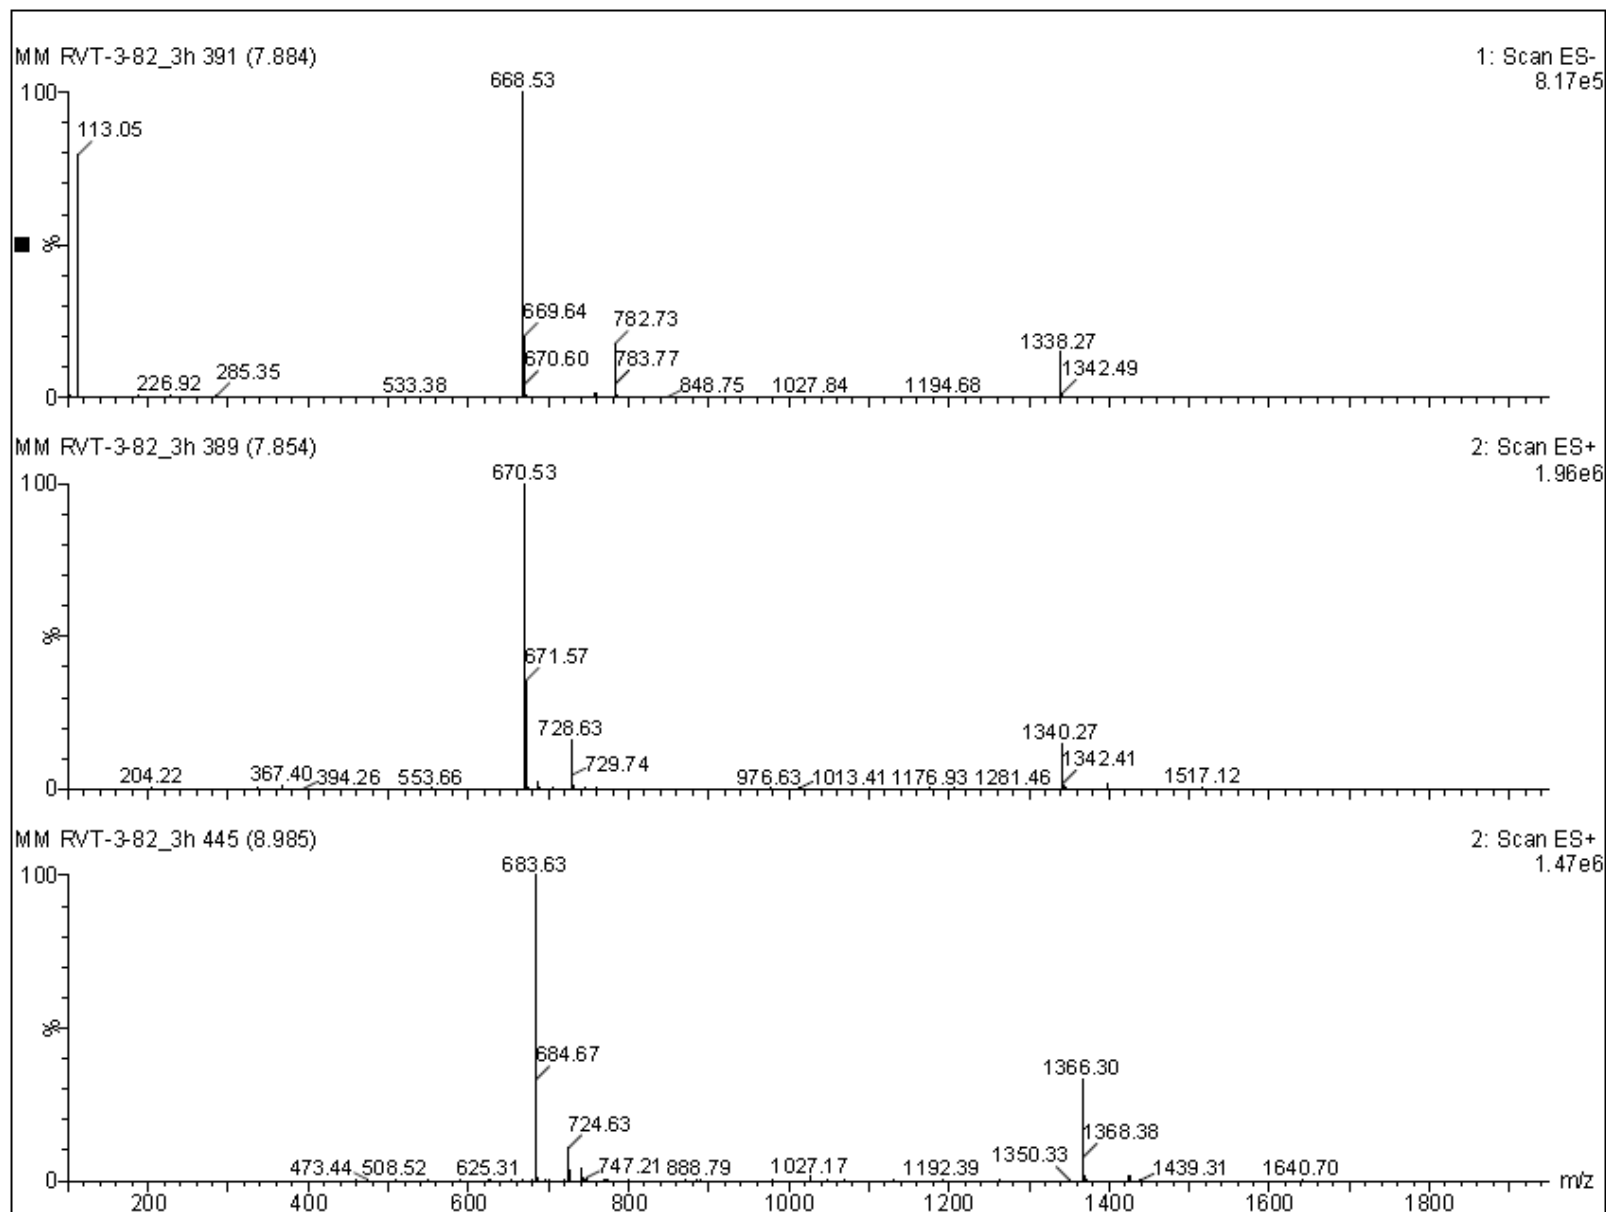

Reaction of **3** with sodium methane thiolate in the presence of terpinene. The LC/MS is shown on the next page.

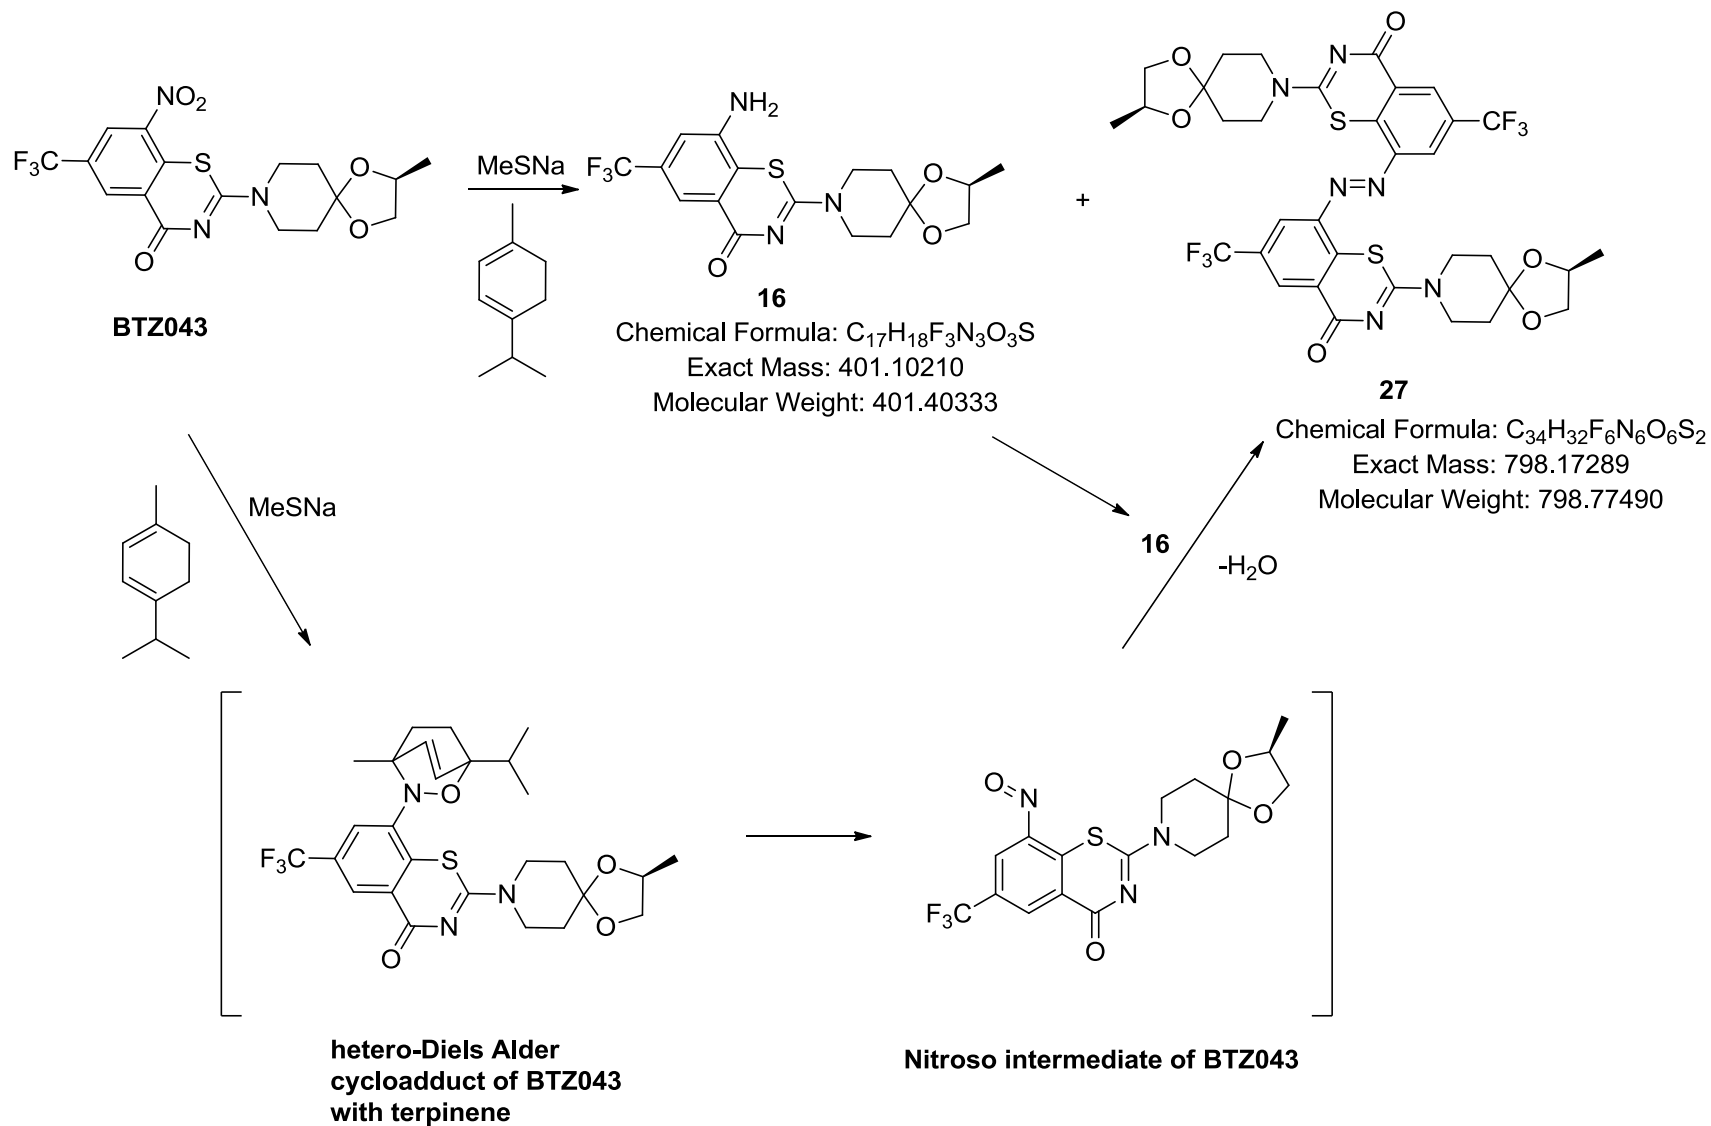

LC/MS

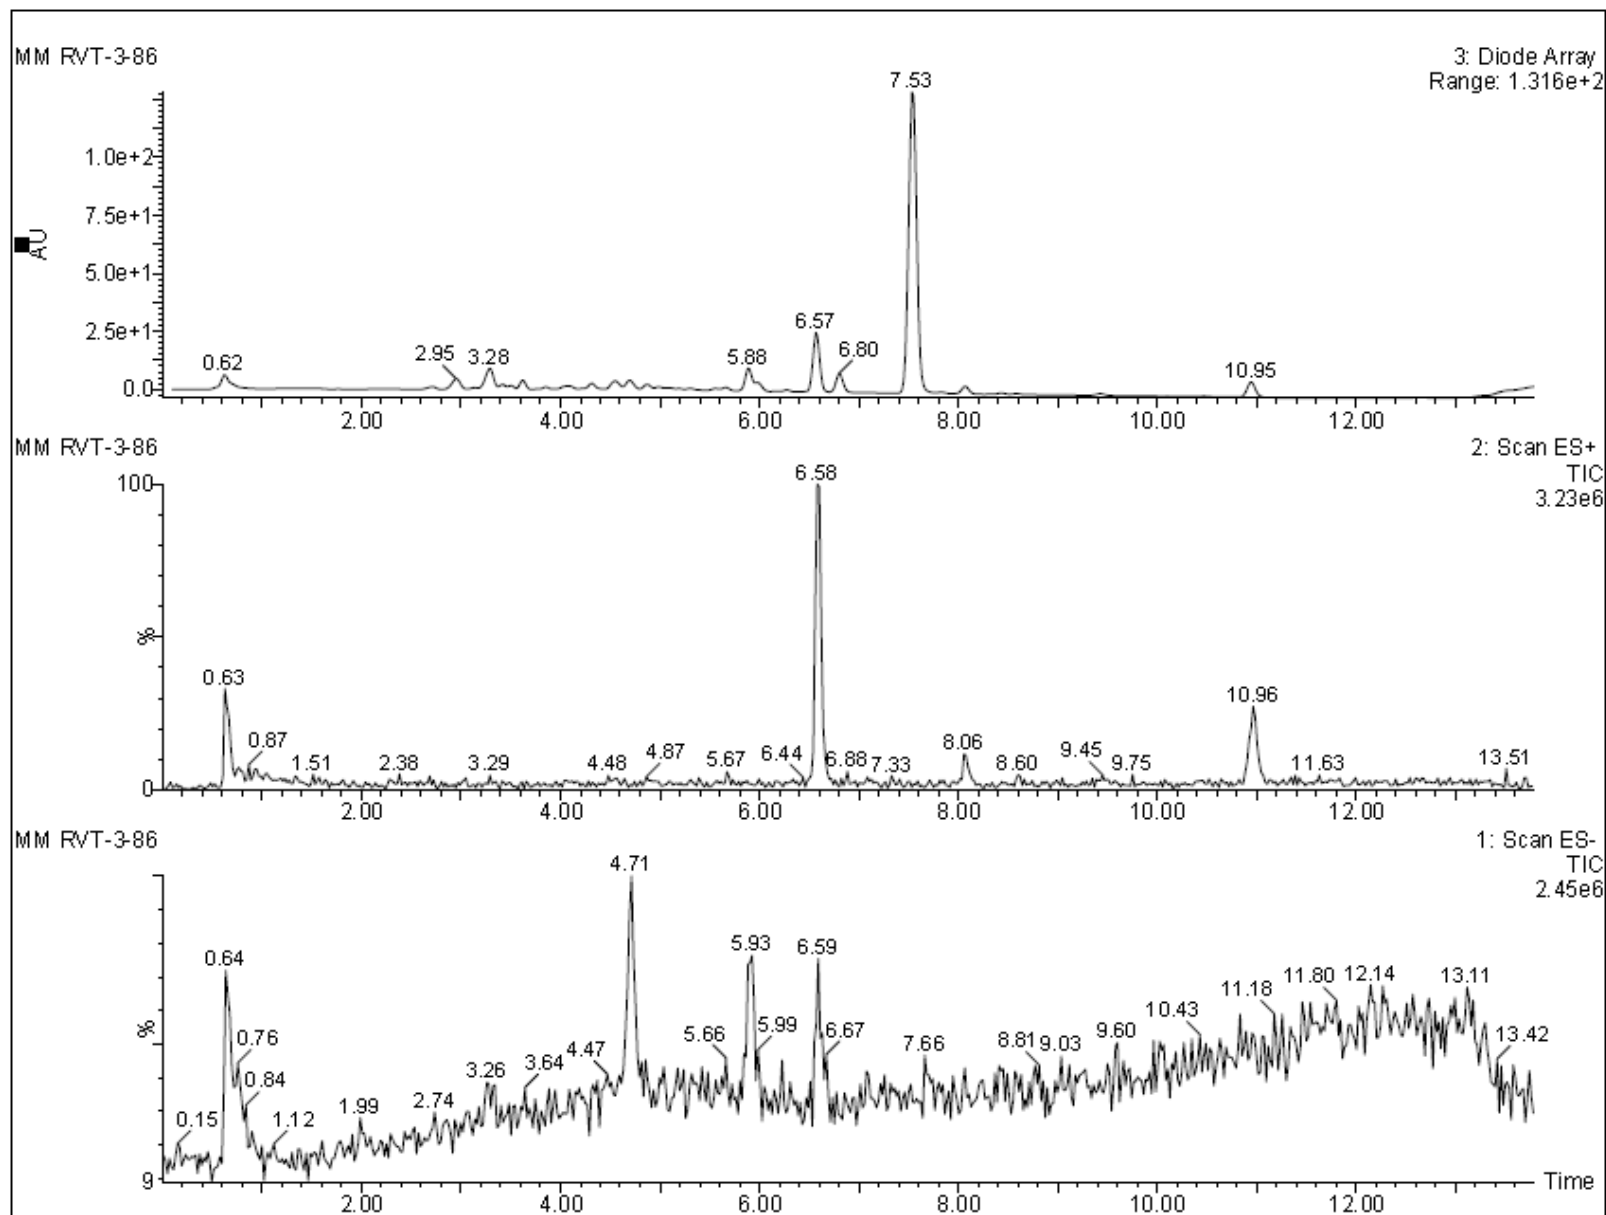

Mass spectra in the positive and the negative ionization mode

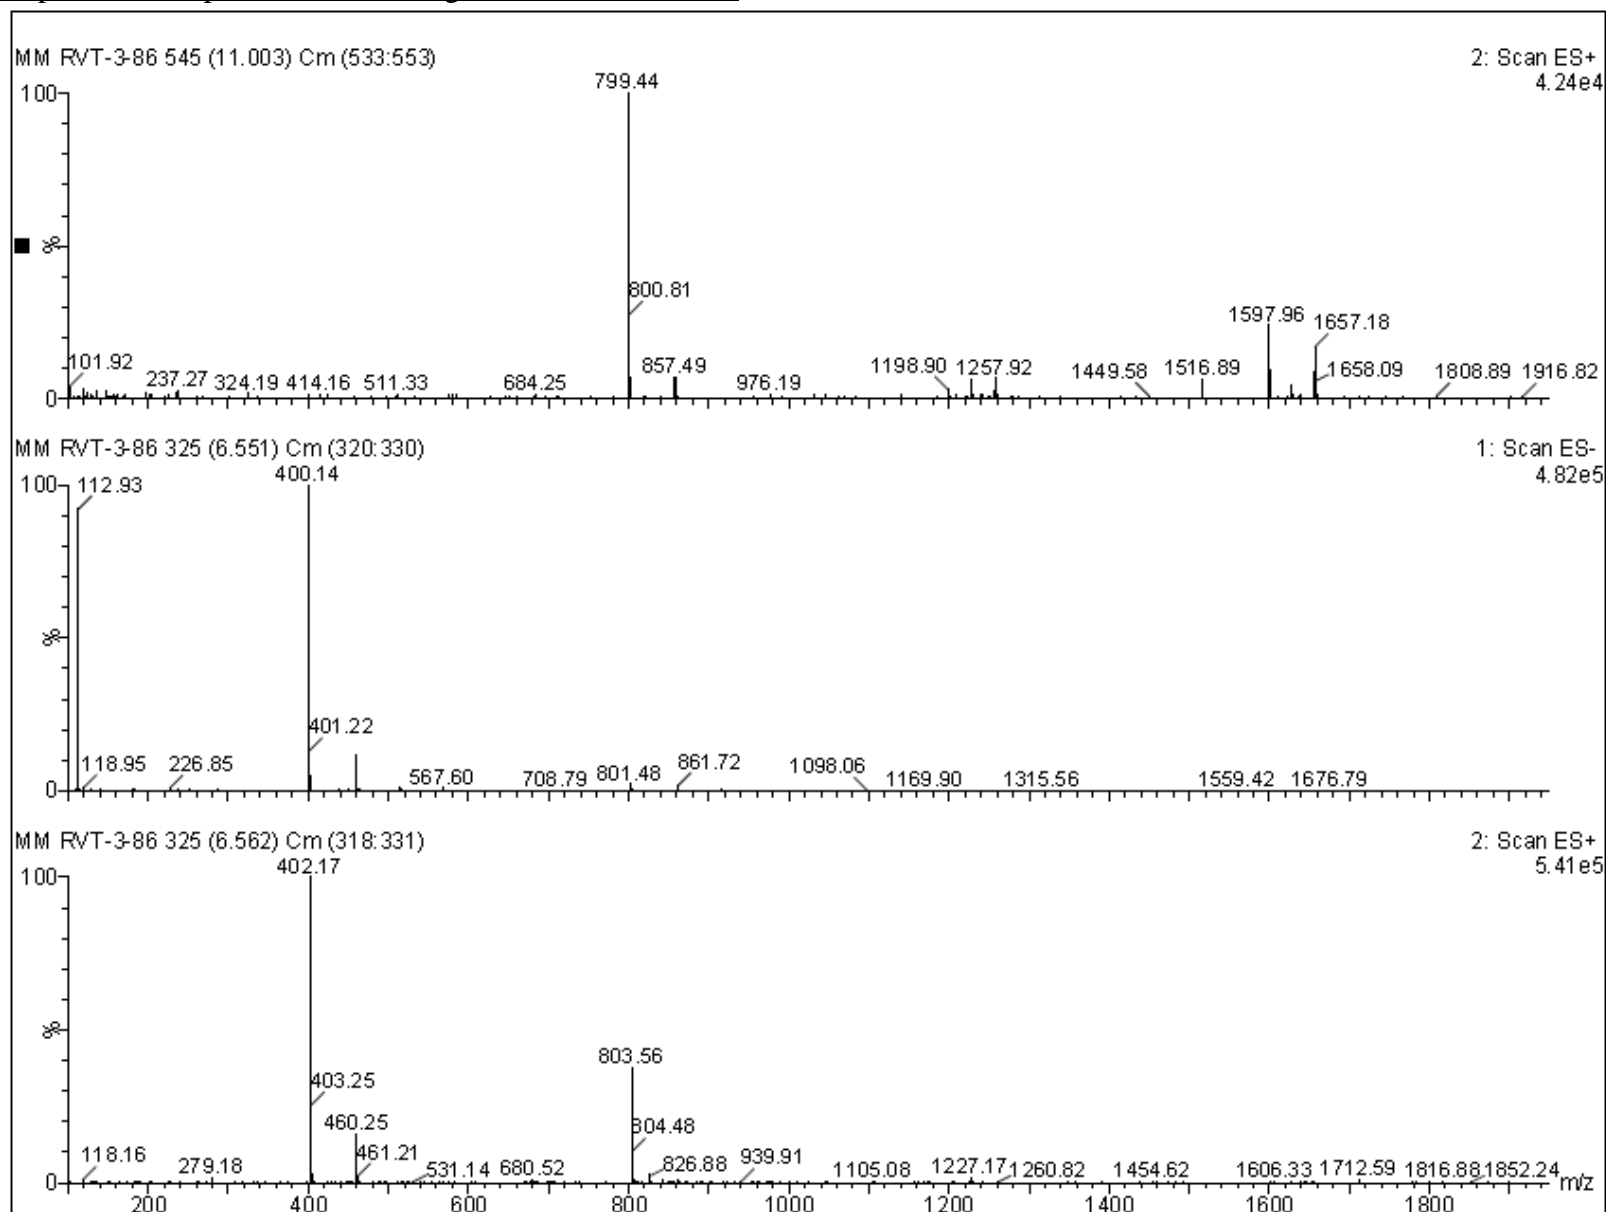

Reaction of **3** with glutathione (GSH) under apparent pH 10-11 in the presence of 1,3-cyclohexadiene. The LC/MS is shown on the next page.

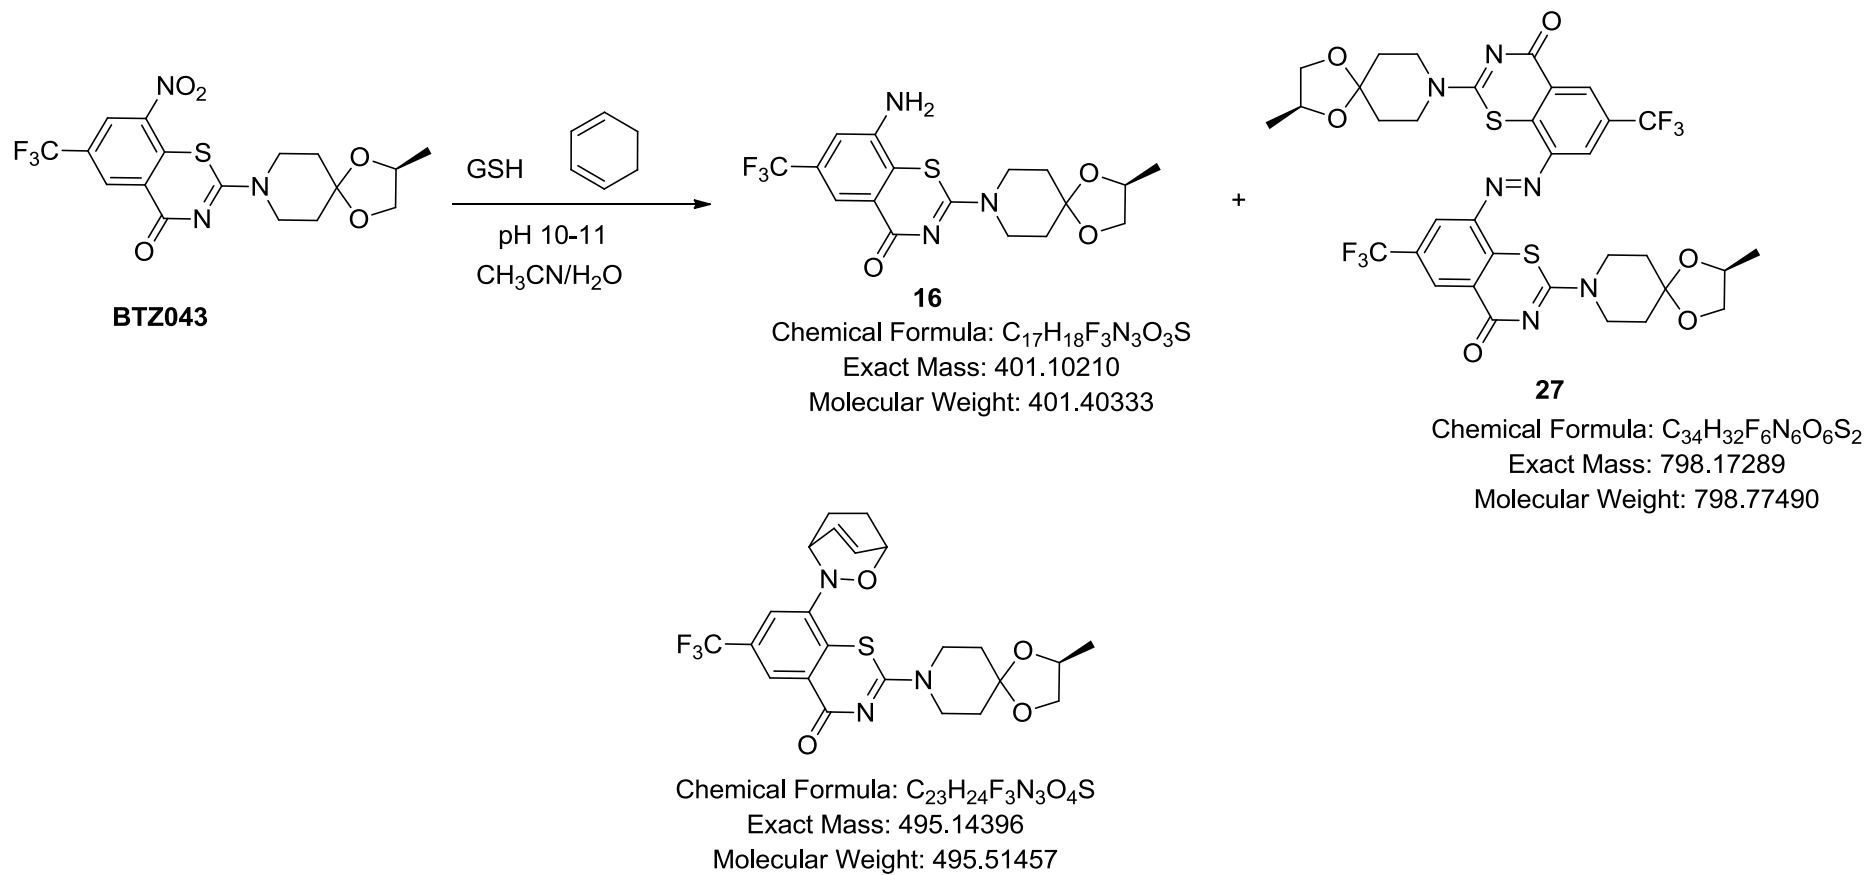

LC/MS

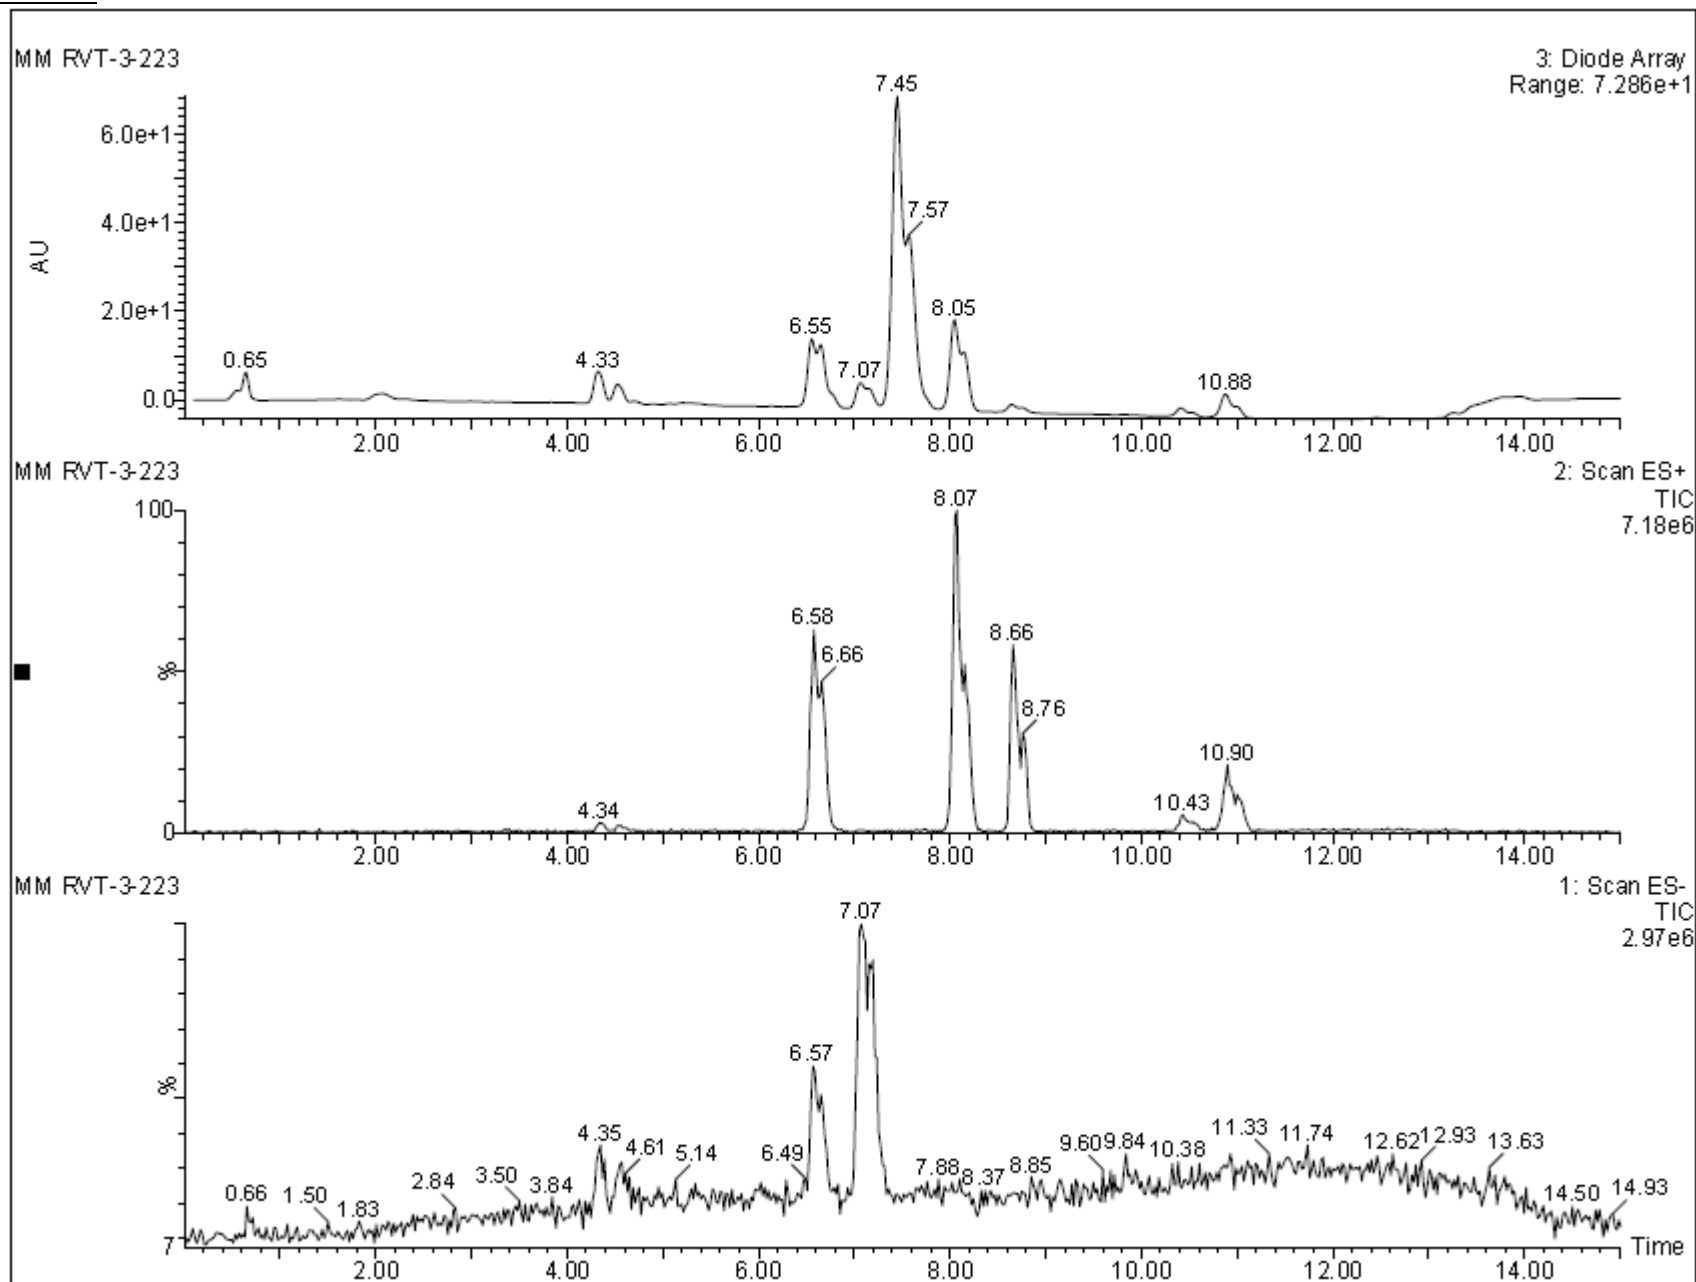

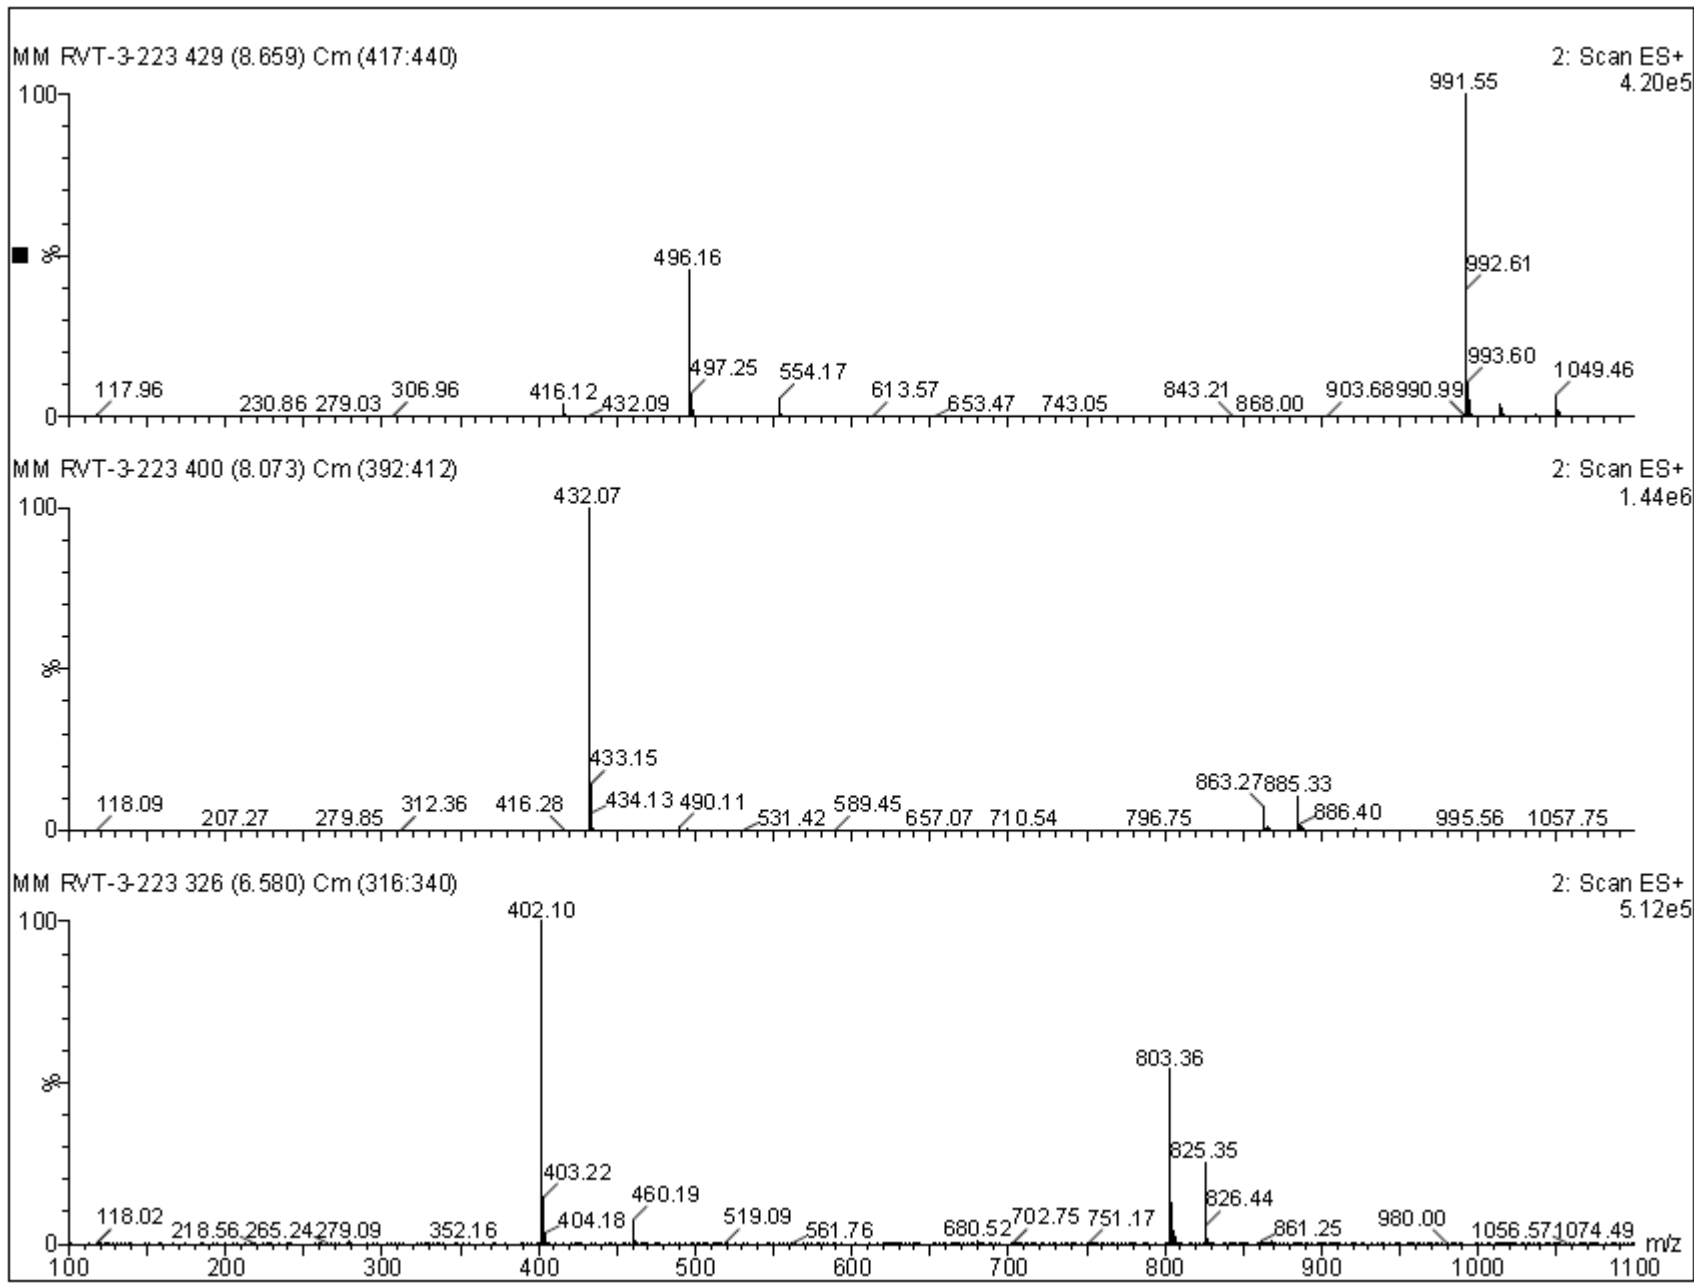

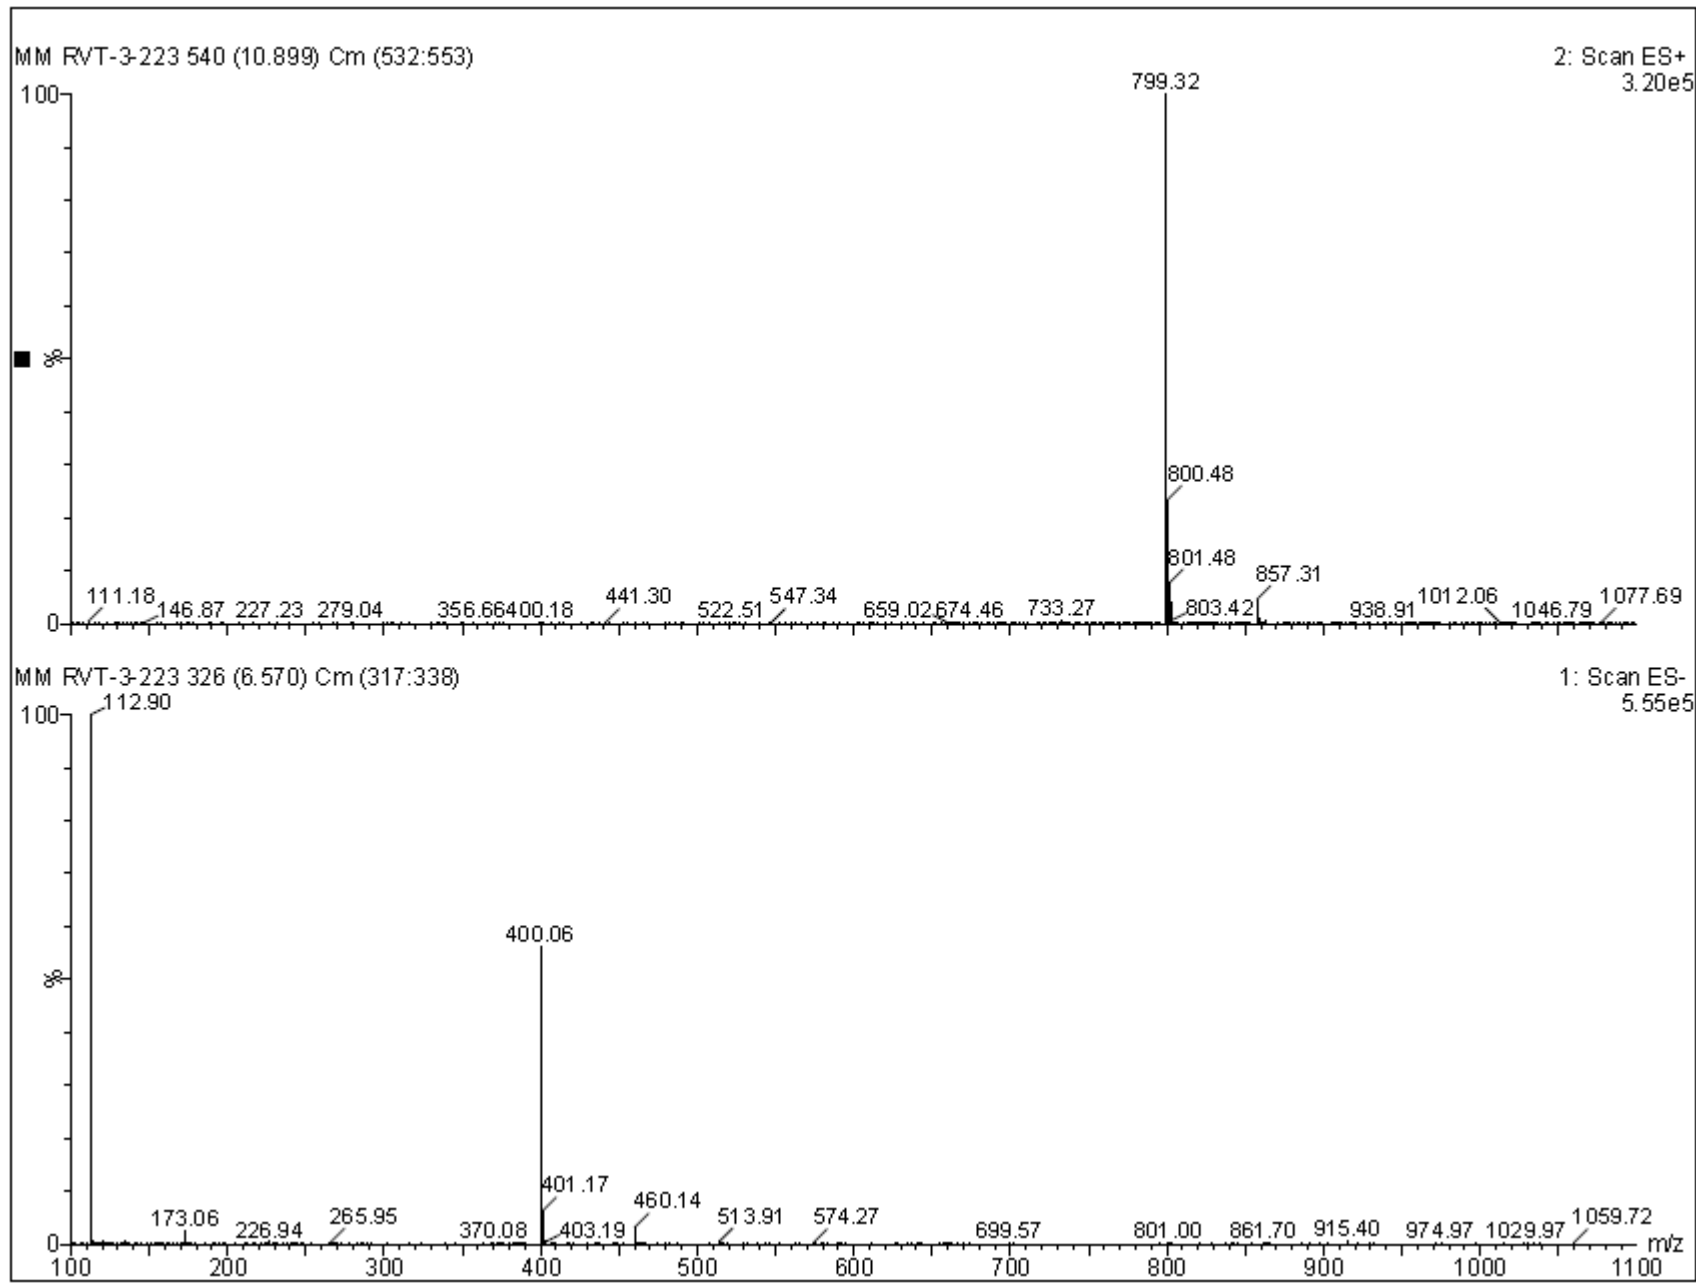



Trapping of the in situ generated nitroso intermediate of **11** by Boc-cysteamine under basic conditions using 1,3-Cyclohexadiene to afford **46**.

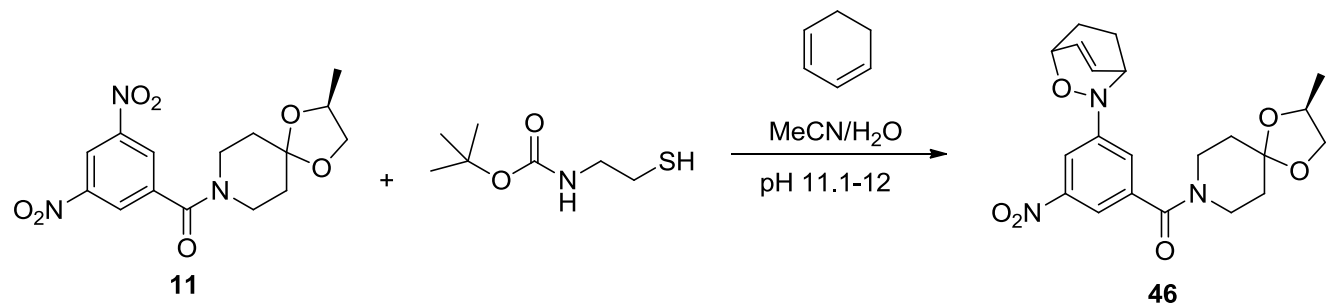

Exact Mass: 415.17434  
Molecular Weight: 415.43970

LC/MS

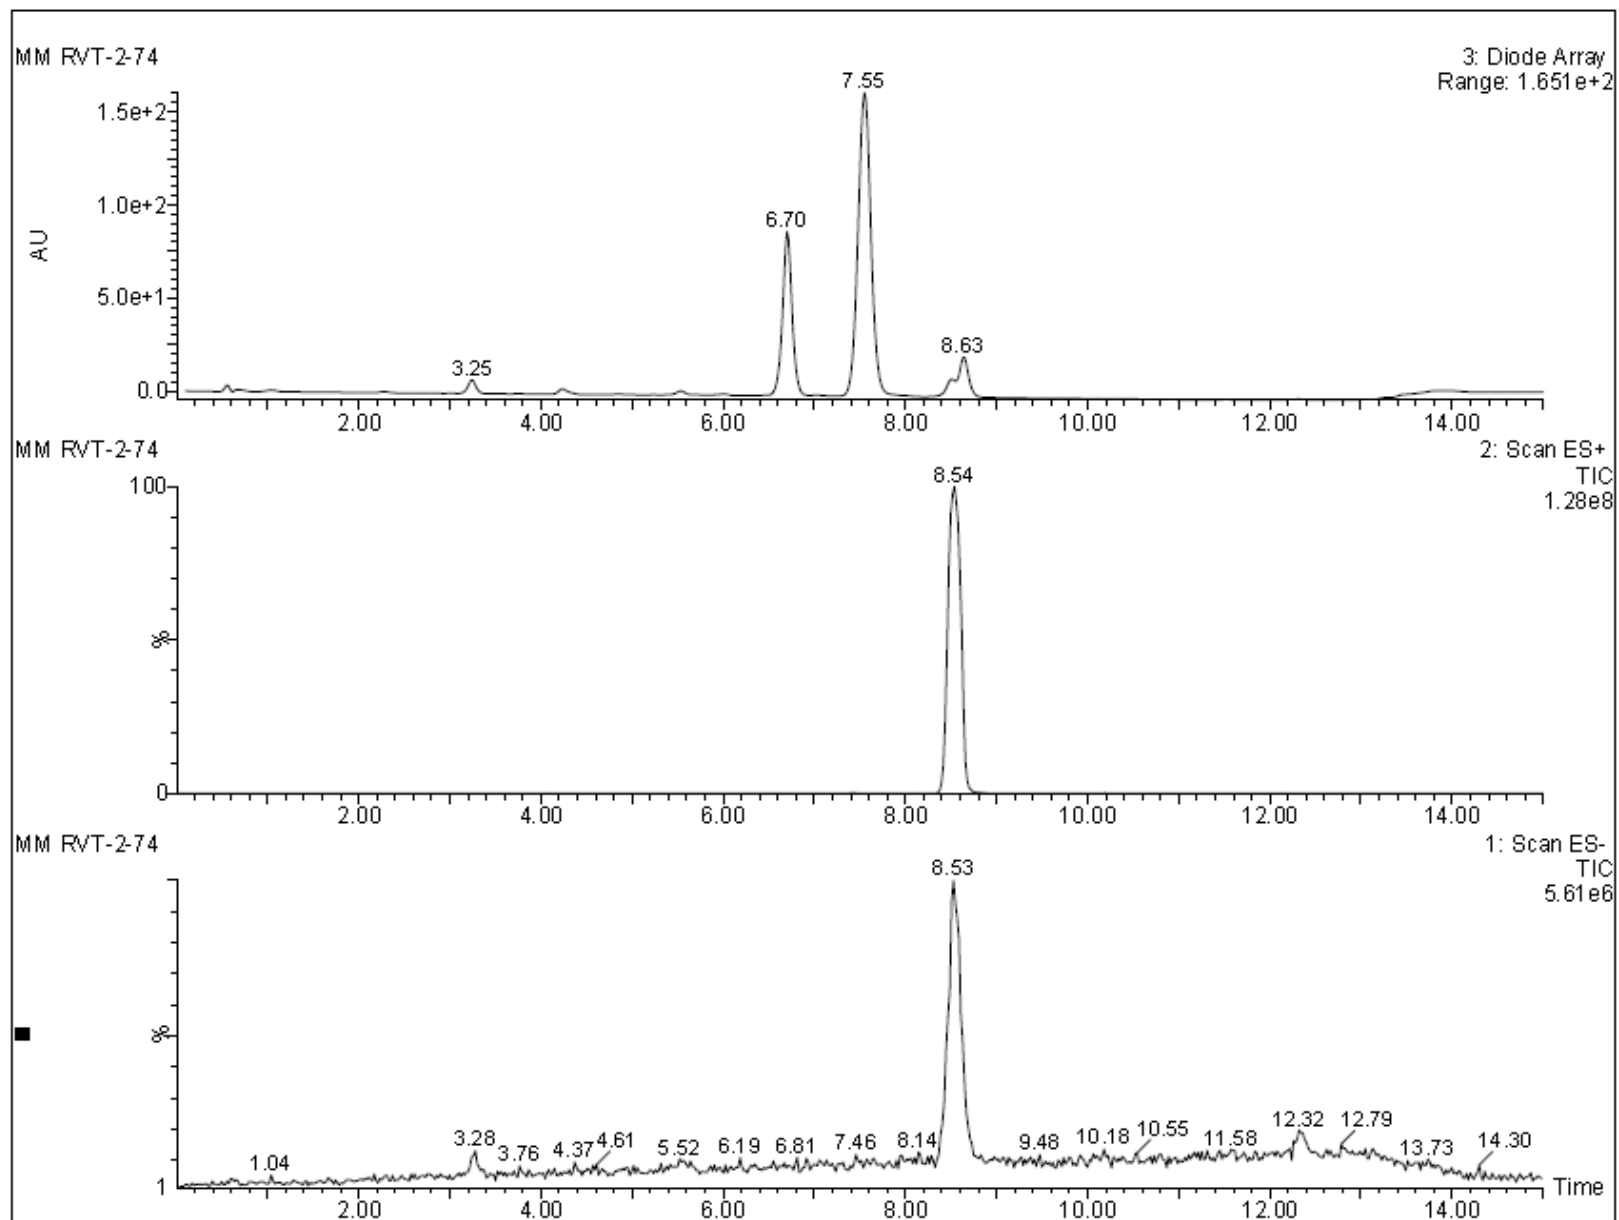

Mass spectra in the positive and the negative ionization mode

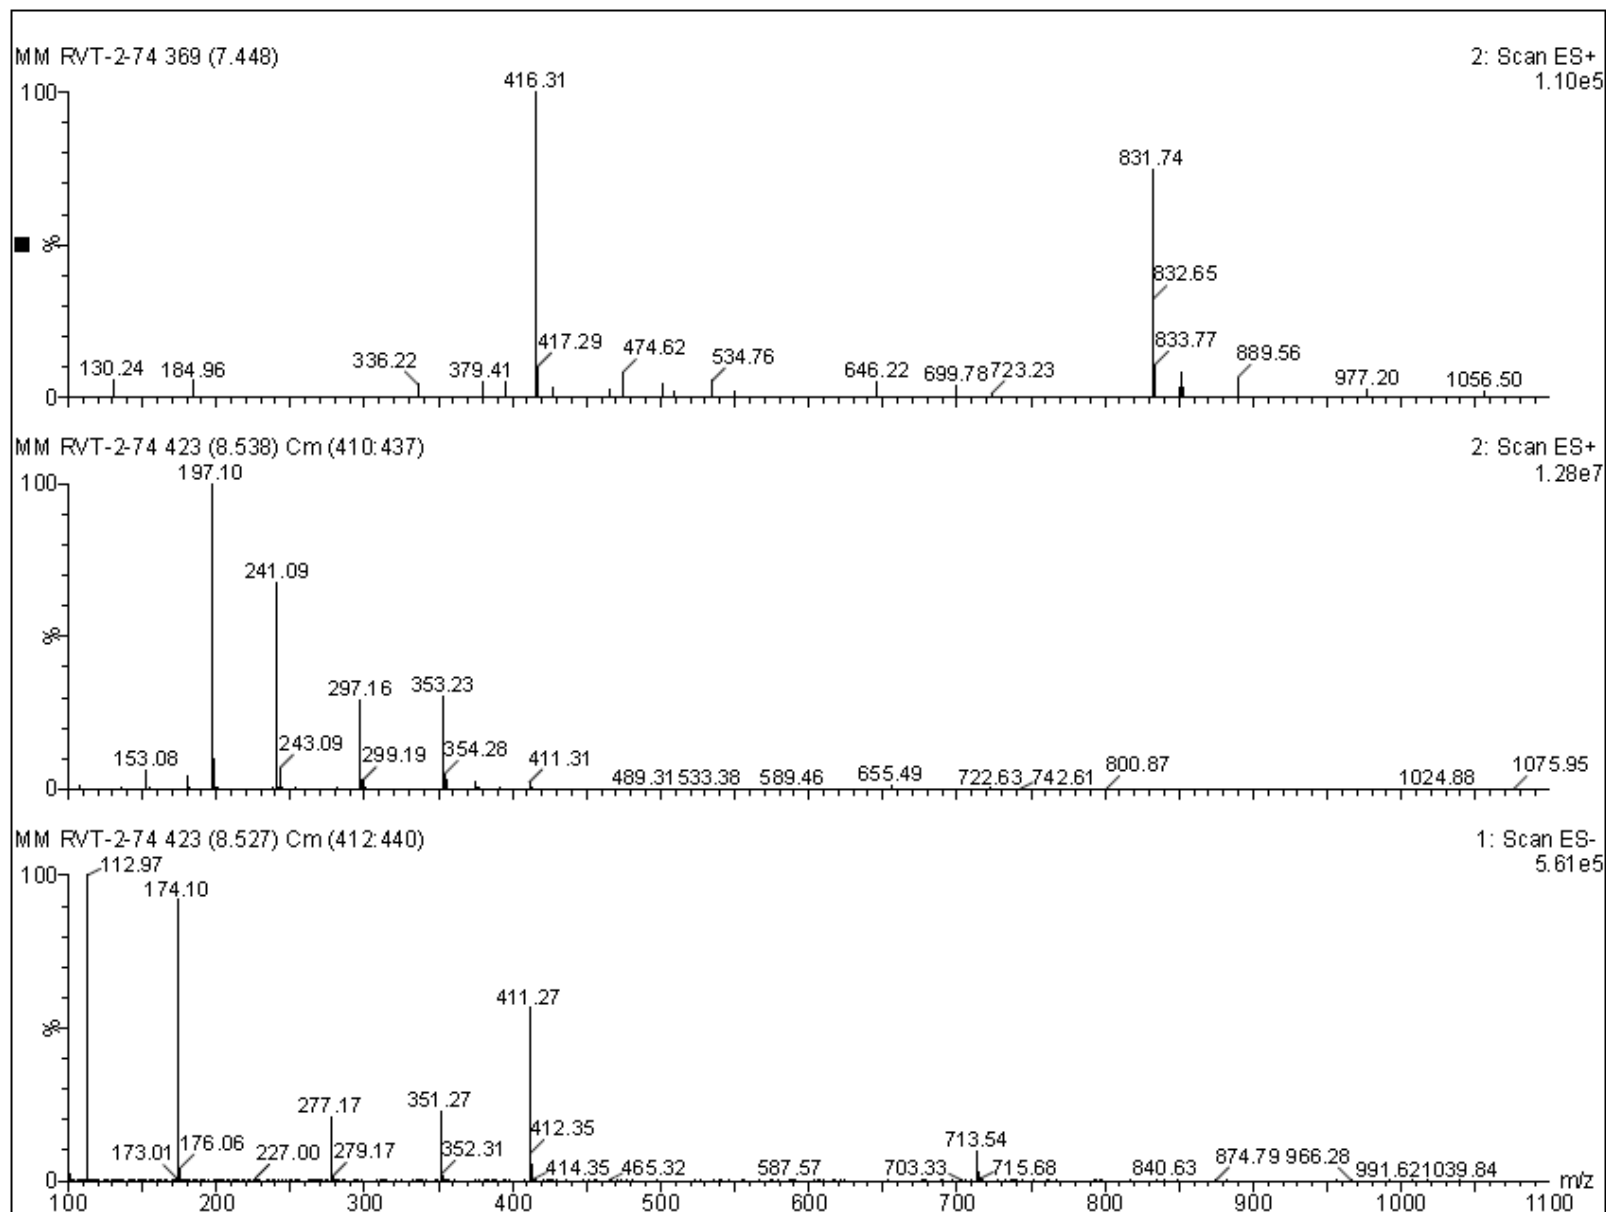

Trapping of the in situ generated nitroso intermediate of **11** by Boc-cysteamine under basic conditions using  $\alpha$ -terpinene to obtain **40**.  
as a mixture of regioisomers.

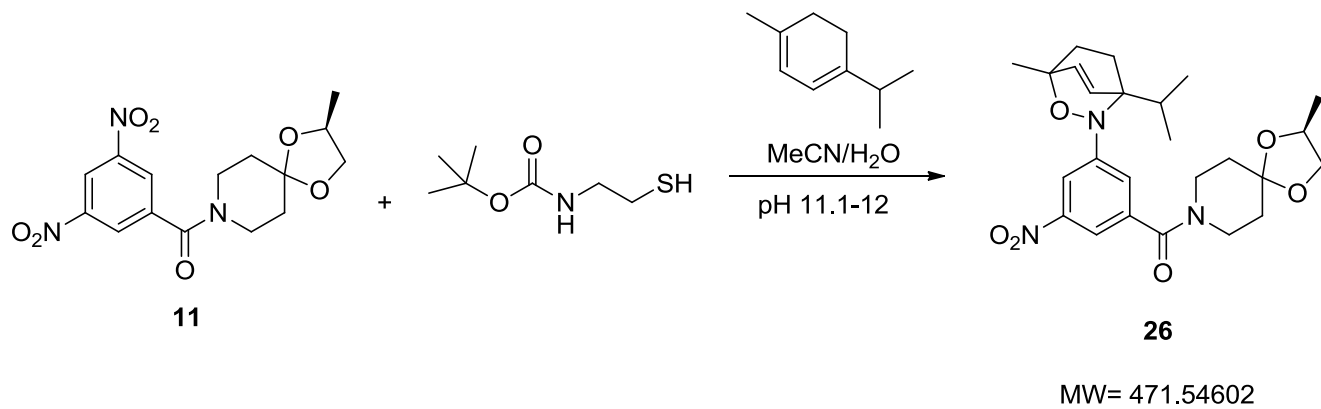

LC/MS

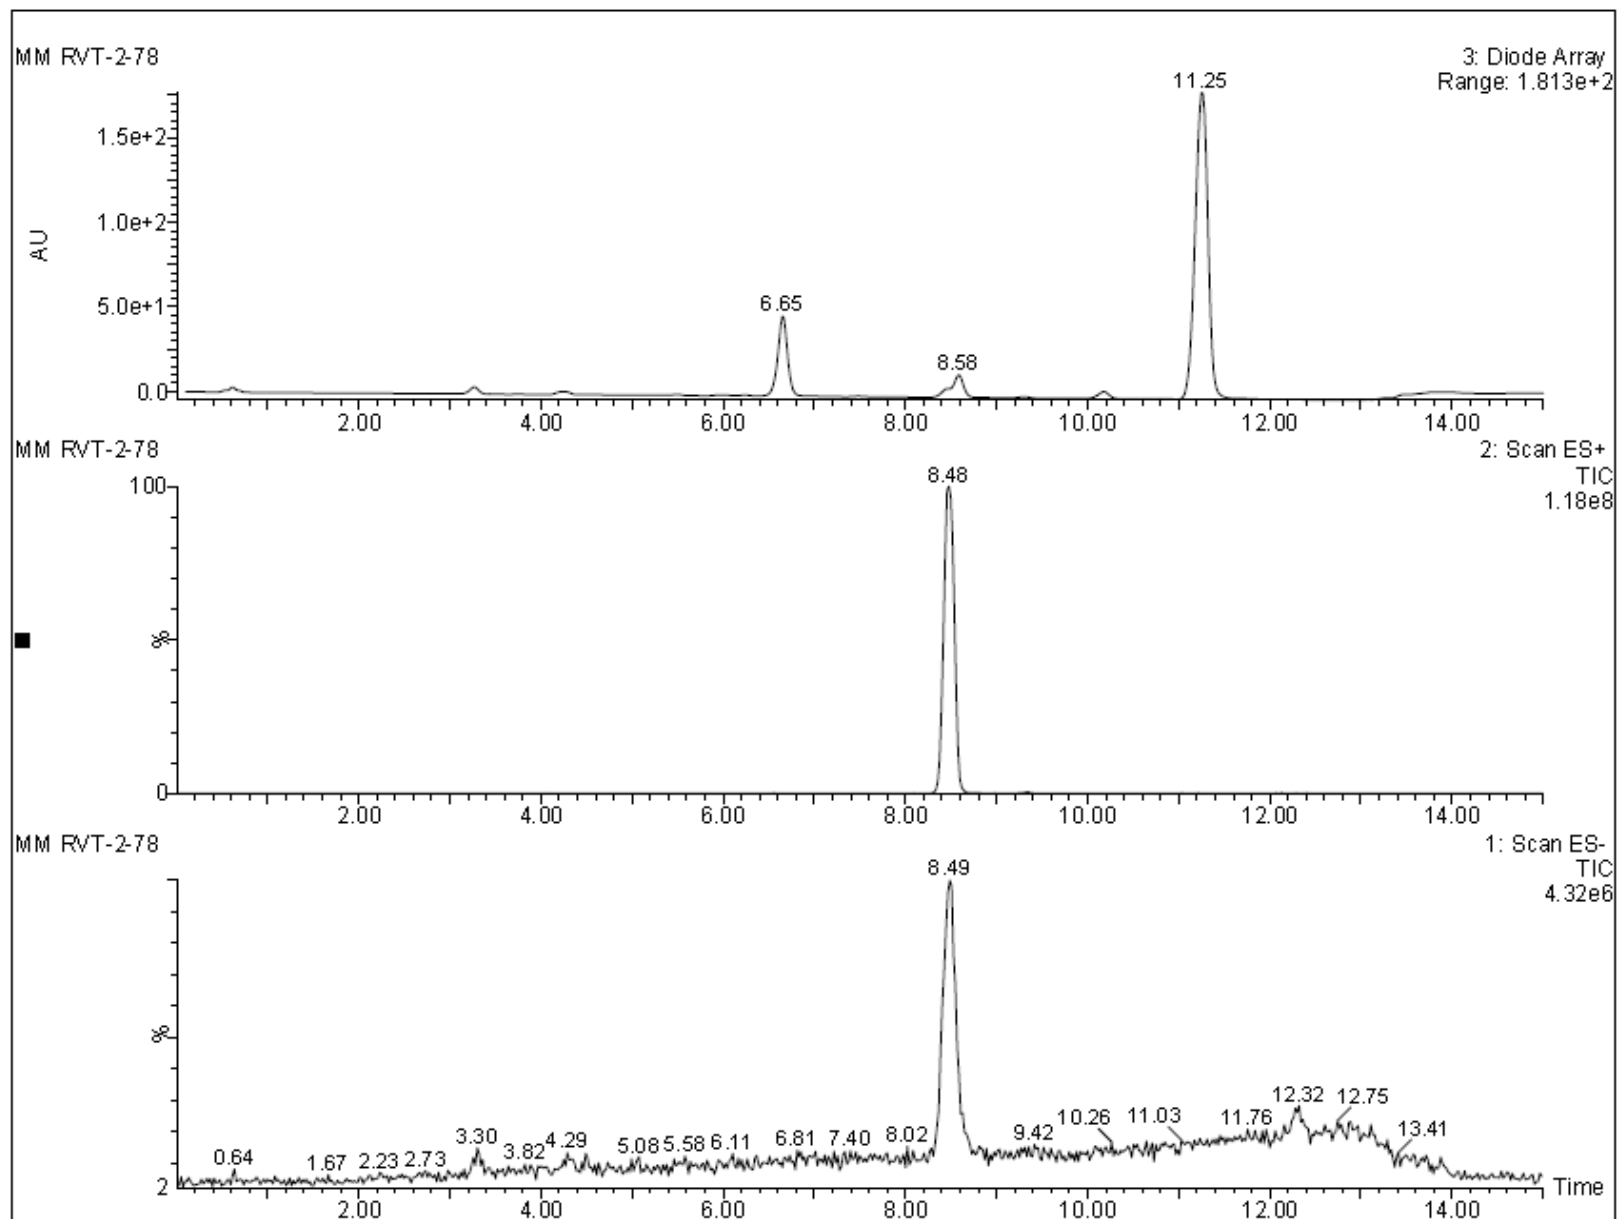

# Mass spectra in the positive and the negative ionization mode

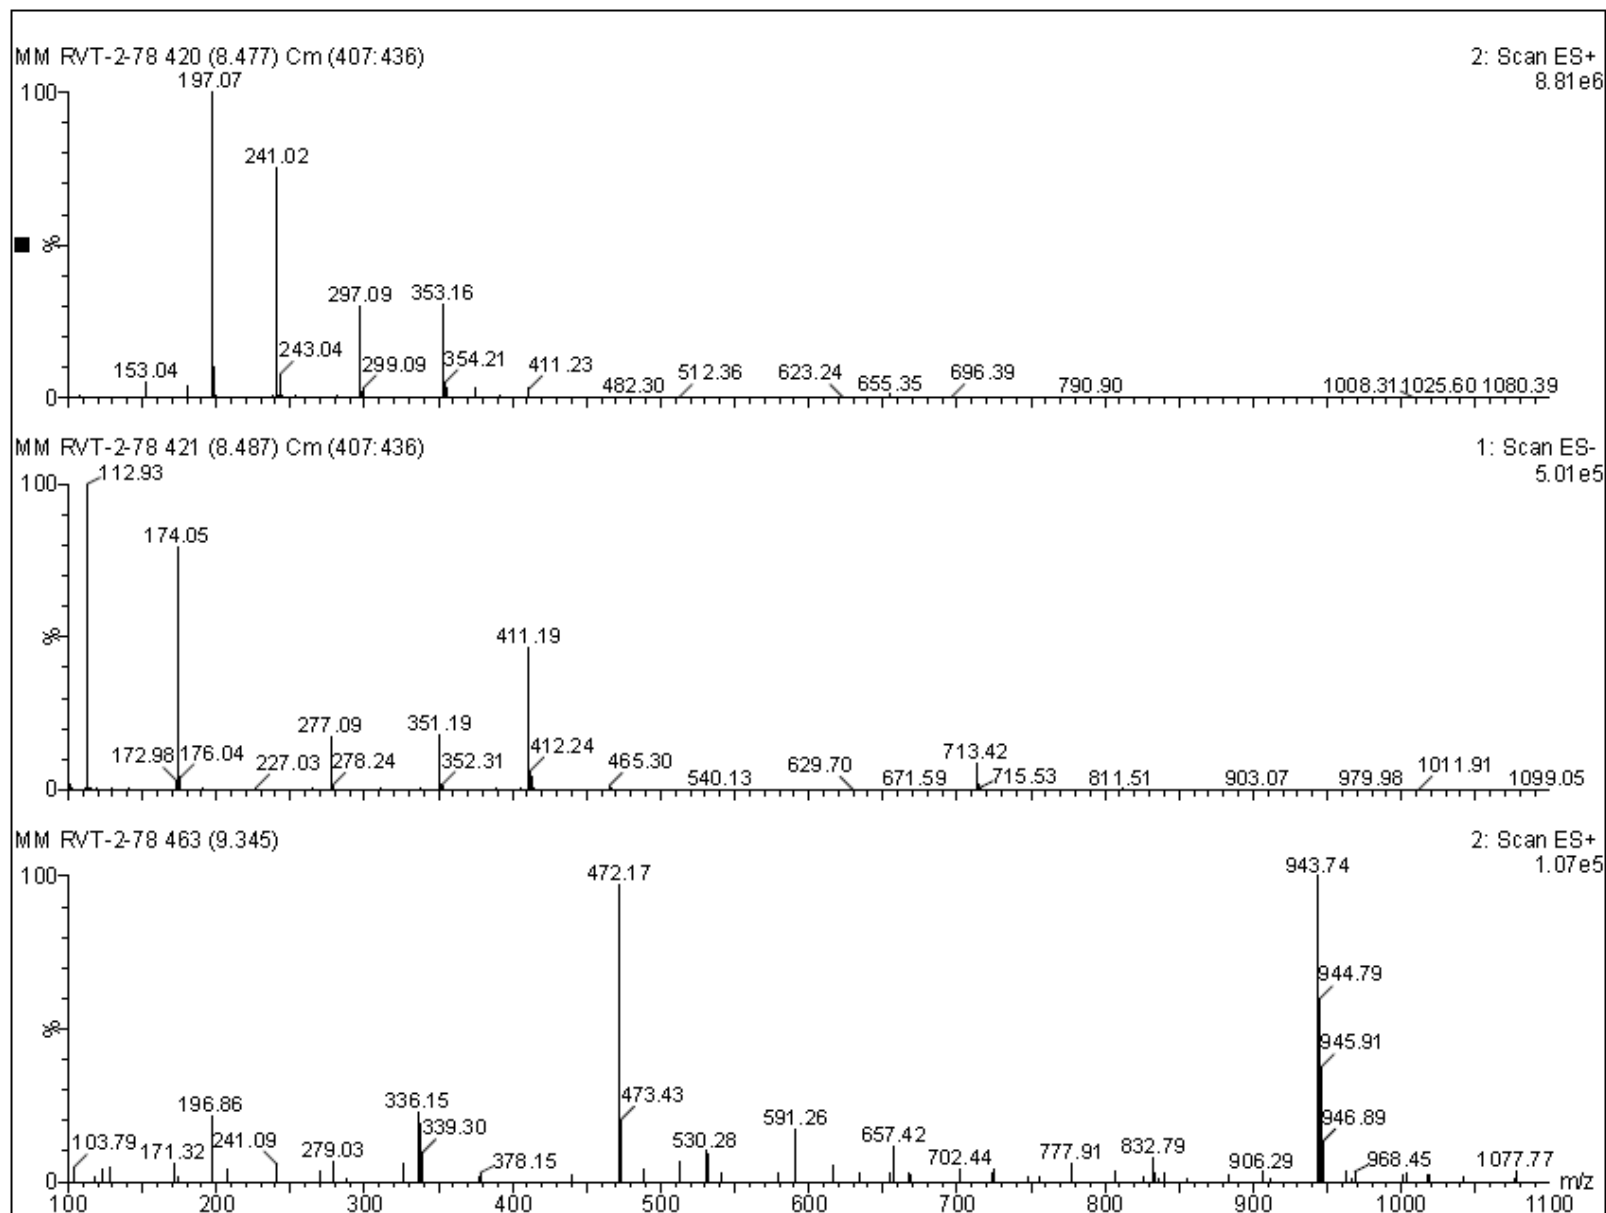

Trapping of the in situ generated nitroso intermediate of **11** by Sodium methane thiolate in a mixture of acetonitrile and water using 1,3-Cyclohexadiene to afford **46**.

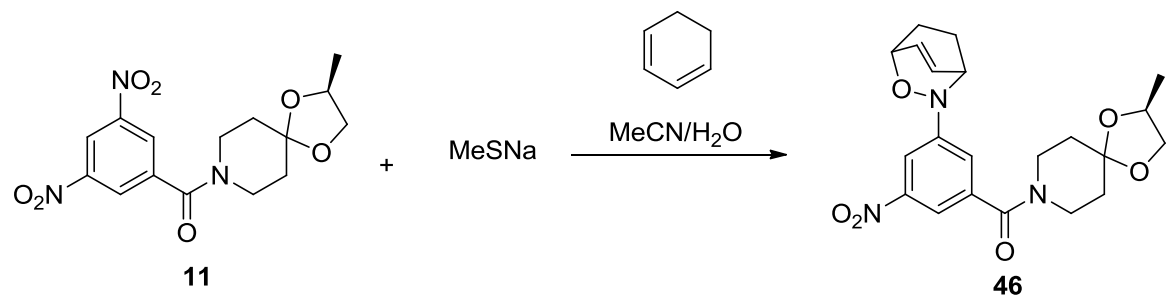

Exact Mass: 415.17434  
Molecular Weight: 415.43970

LC/MS

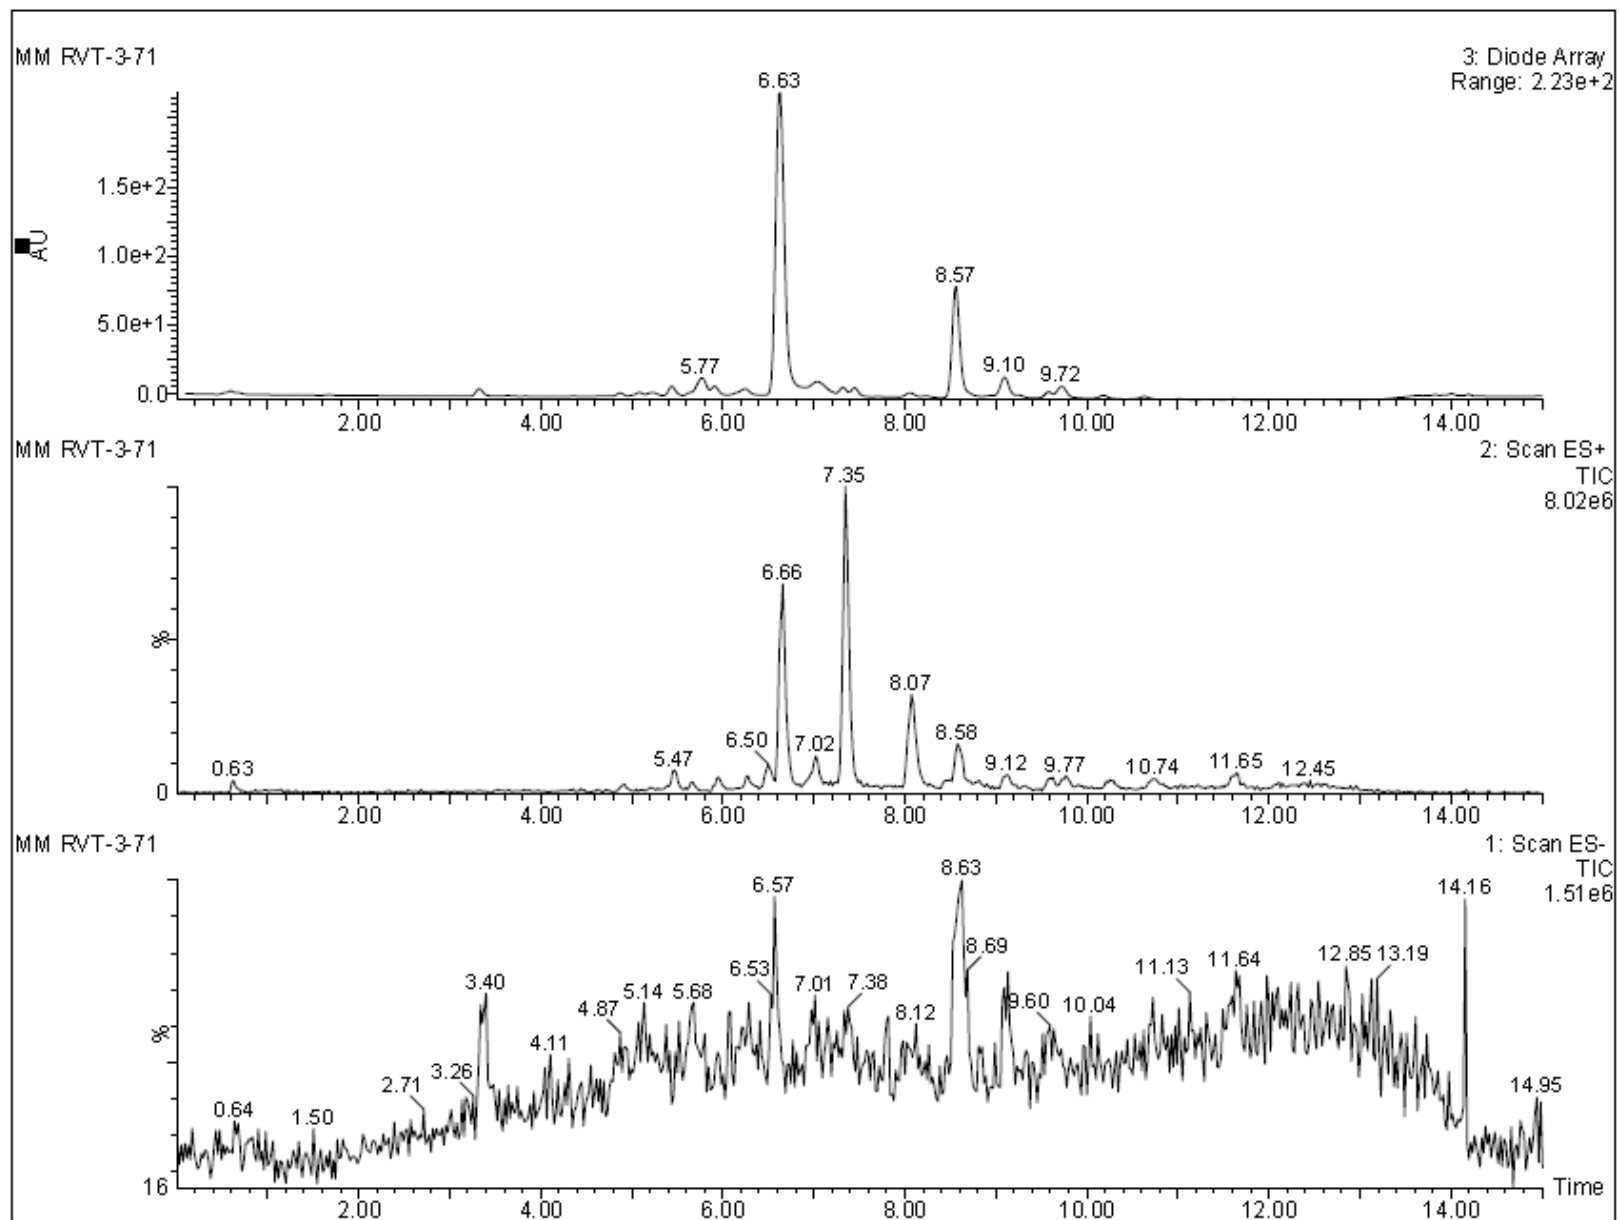



Mass spectra in the positive and the negative ionization mode

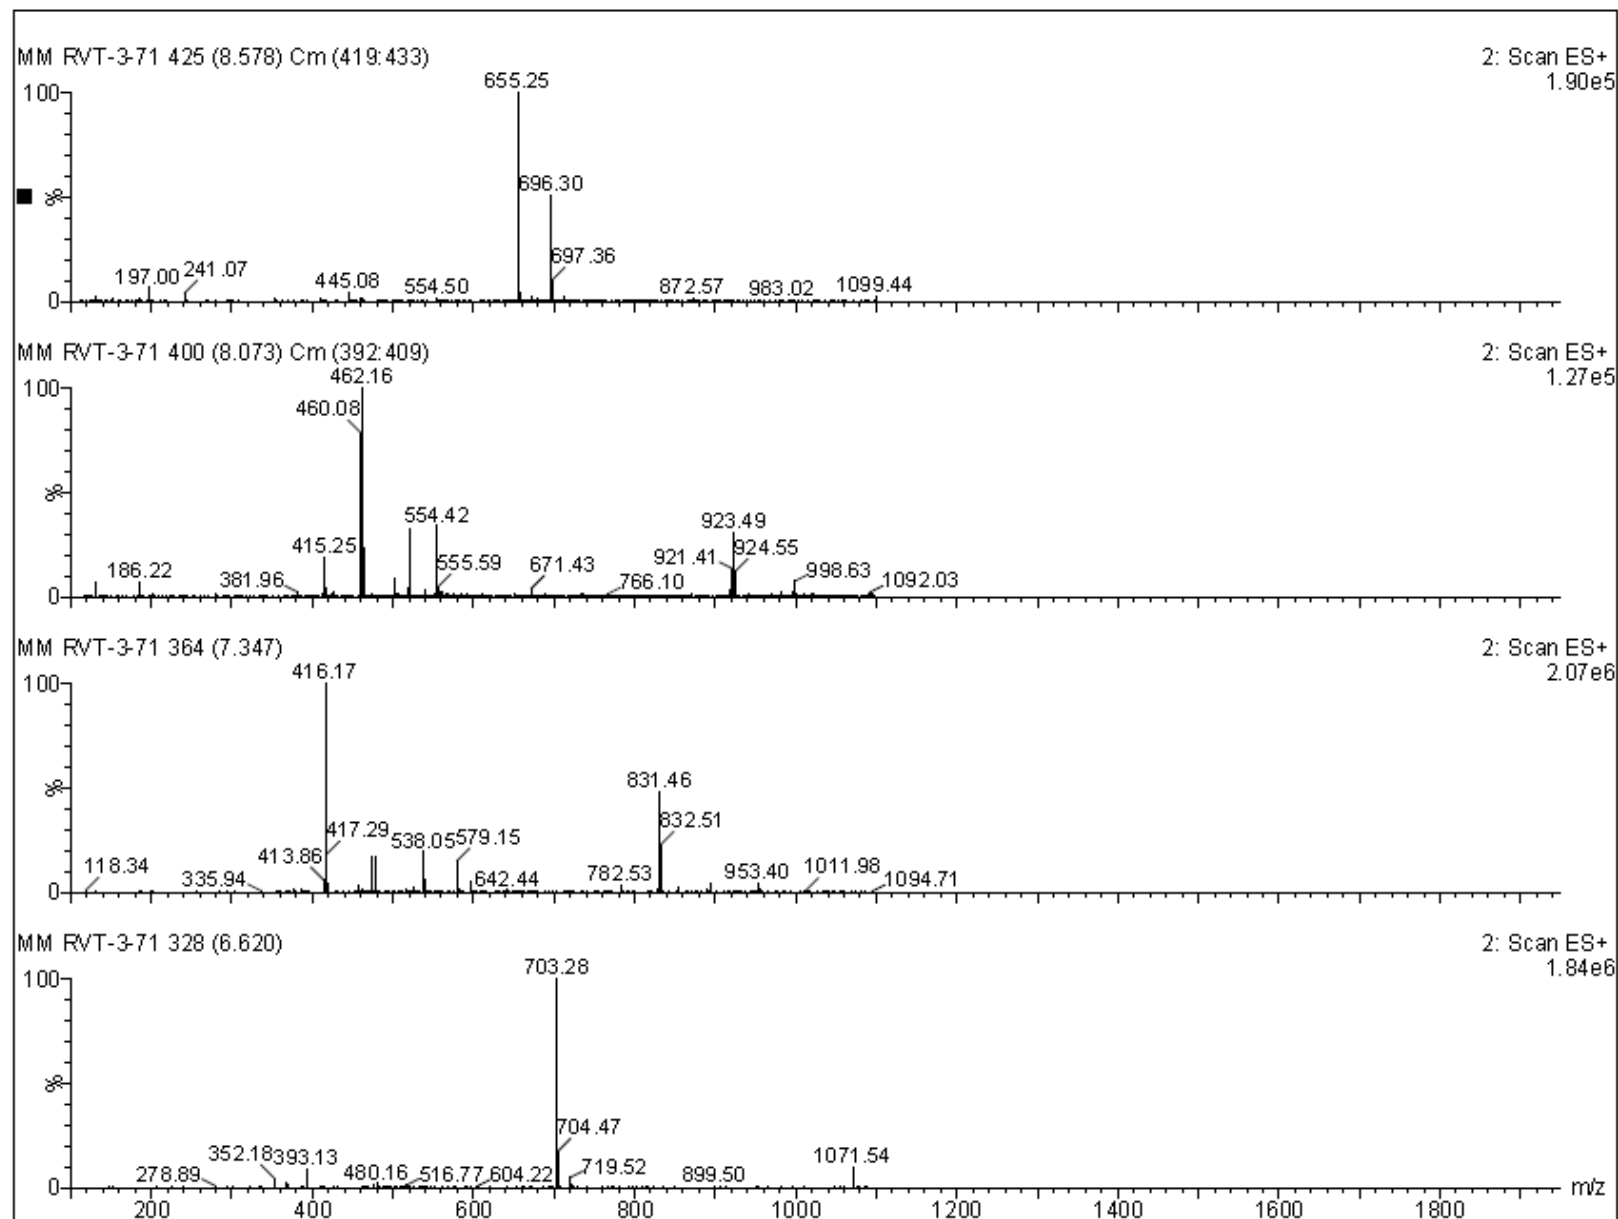

Trapping of the in situ generated nitroso intermediate of **11** by Sodium methane thiolate in a deoxygenated mixture of acetonitrile and water using 1,3-Cyclohexadiene to afford **46**.

Acetonitrile and water mixture was purged with Argon prior to the addition of the starting material. To this solvent mixture was added **11**, followed by 1,3-cyclohexadiene and NaSMe under argon flow. The reaction mixture was then stirred at room temperature under argon.

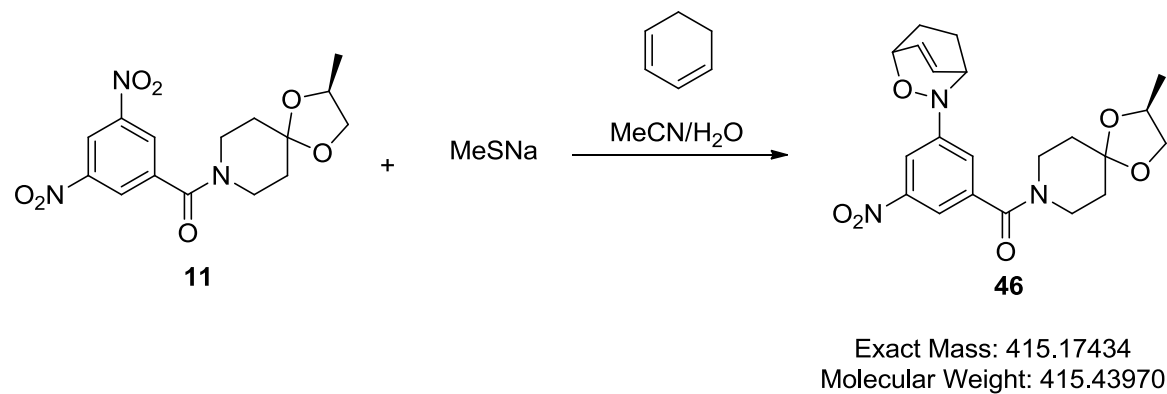

LC/MS

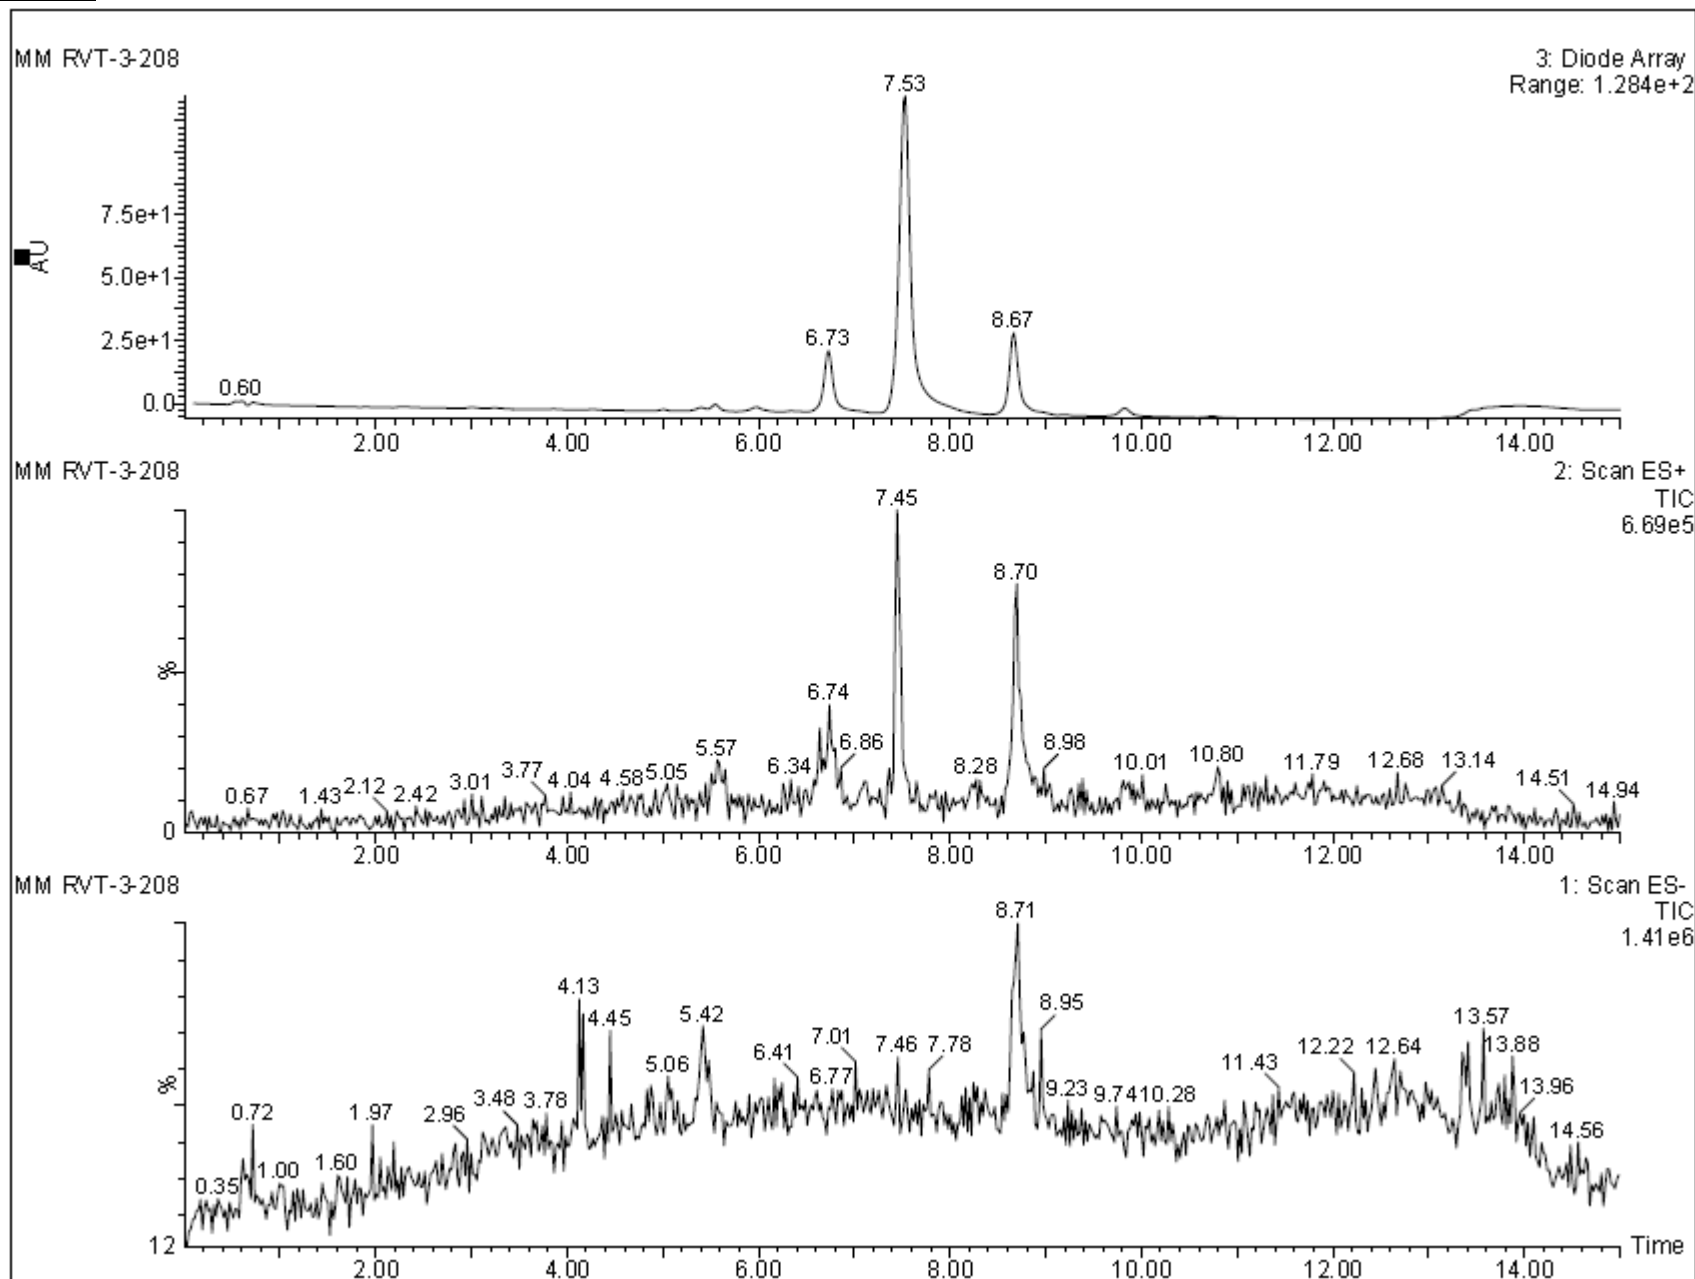

Mass spectra in the positive and the negative ionization mode

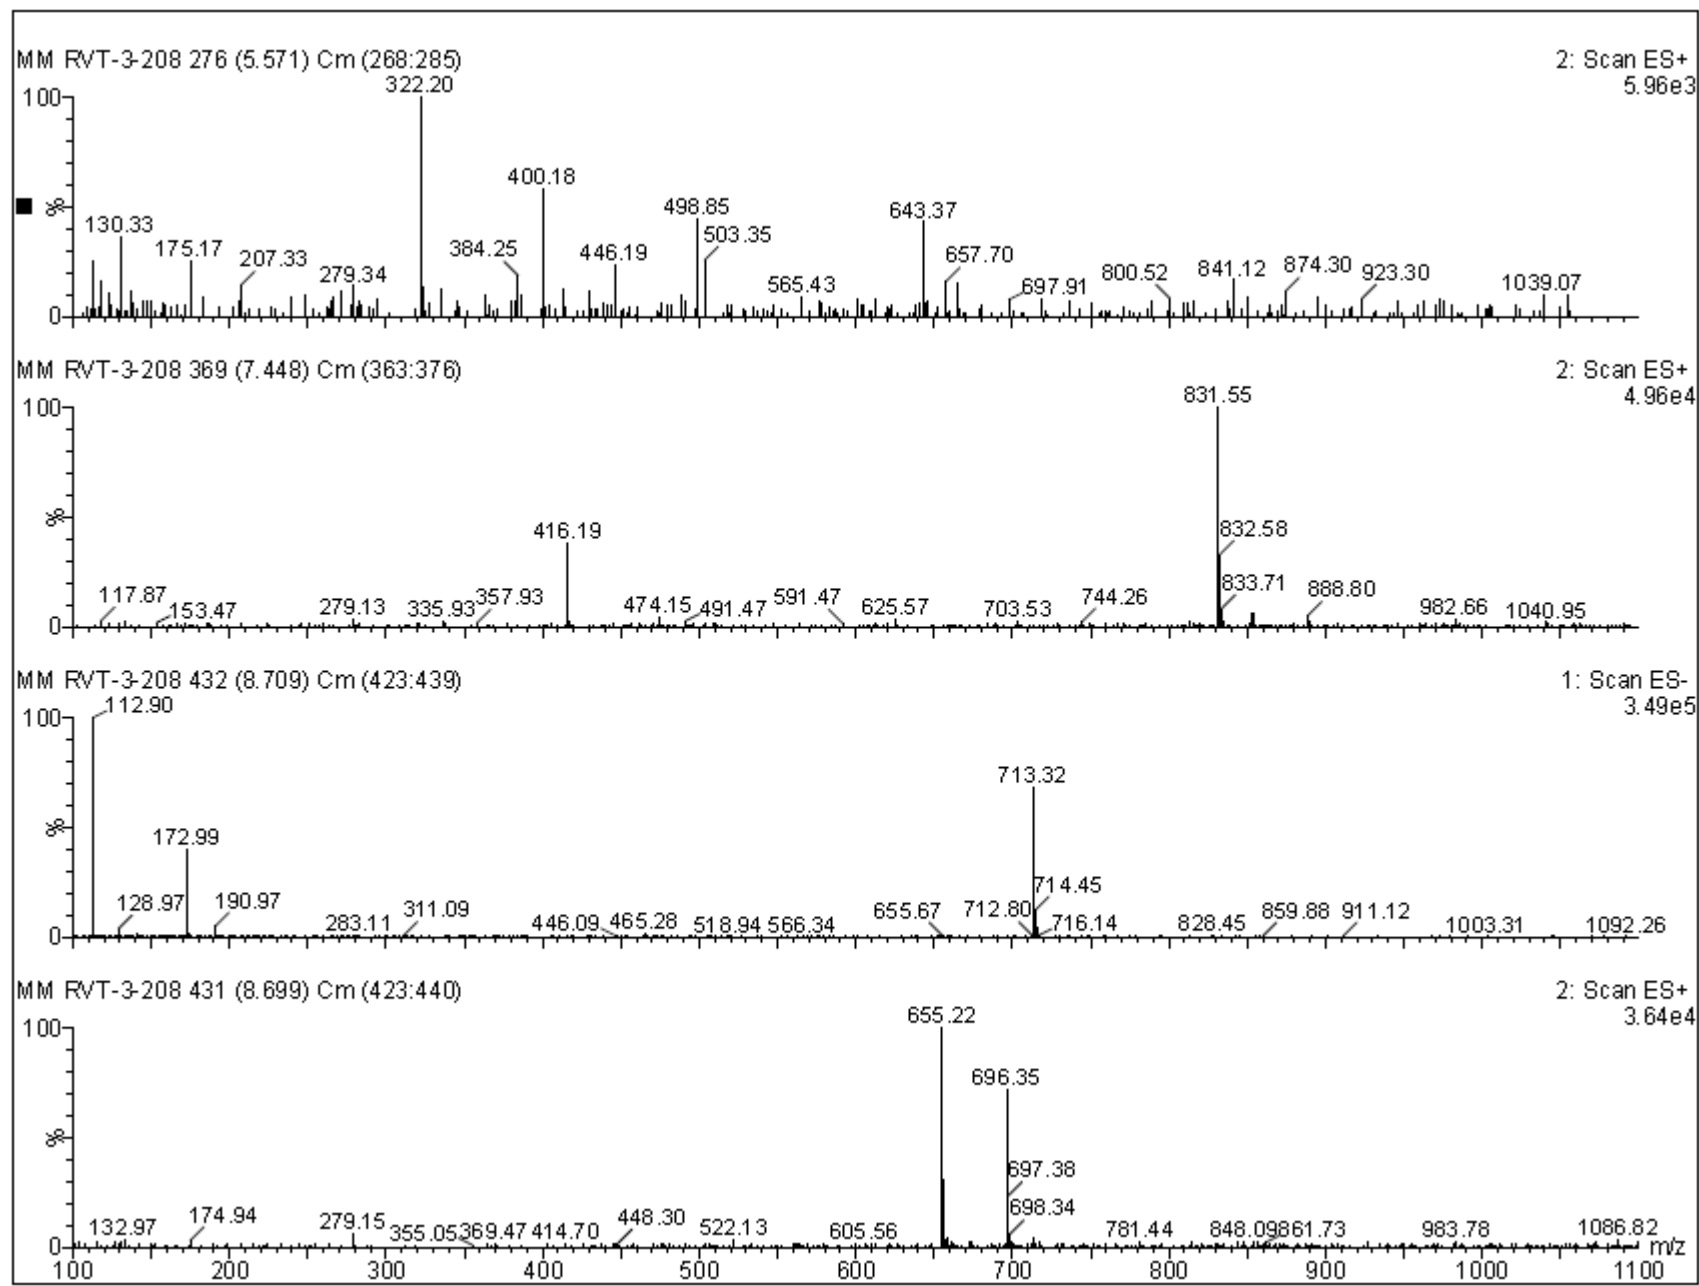

The nitroso trapping experiment of **3** by employing stannous chloride and 1,3-cyclohexadiene to afford **40**.

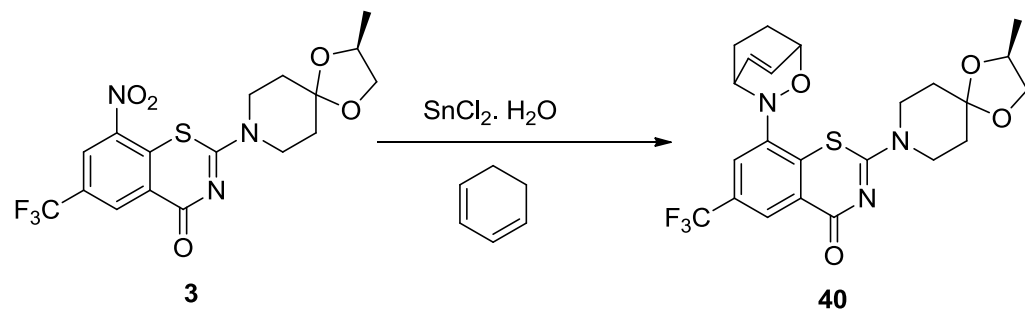

Chemical Formula:  $\text{C}_{23}\text{H}_{24}\text{F}_3\text{N}_3\text{O}_4\text{S}$

Exact Mass: 495.1440

Molecular Weight: 495.5146

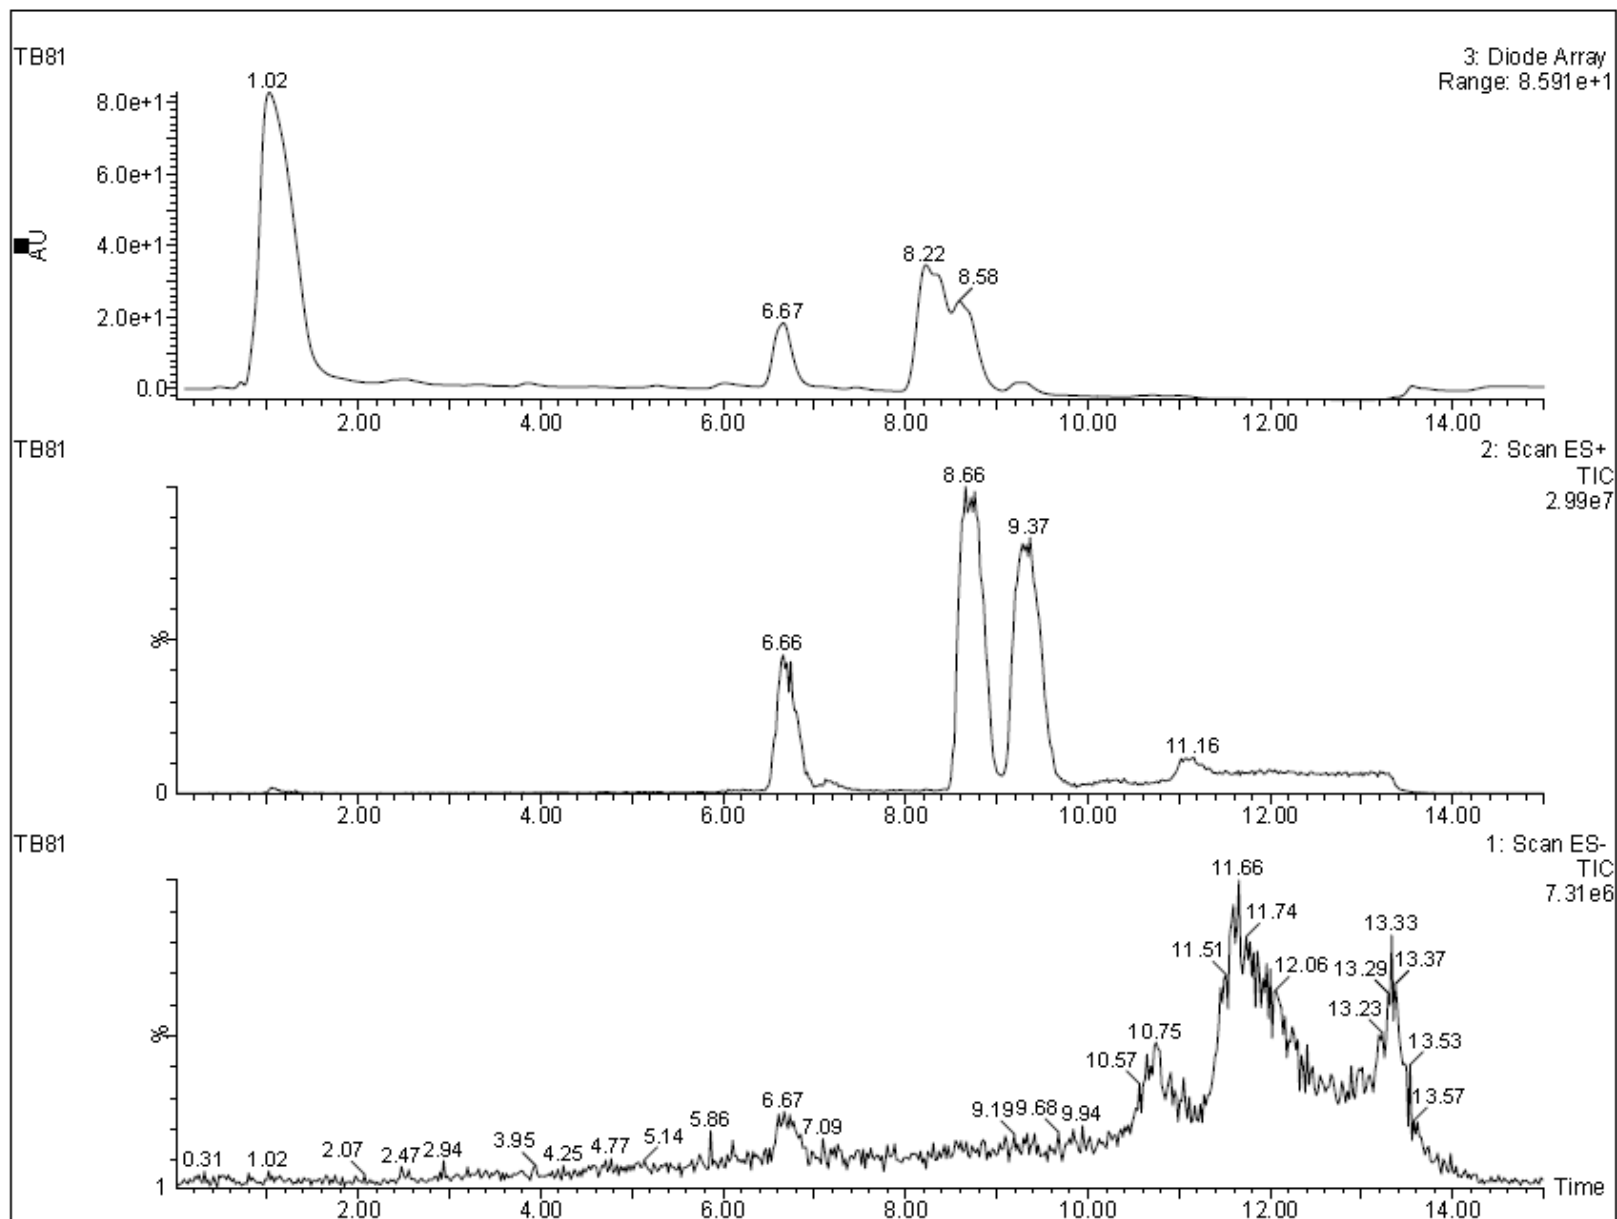

Mass spectra in the positive ionization mode

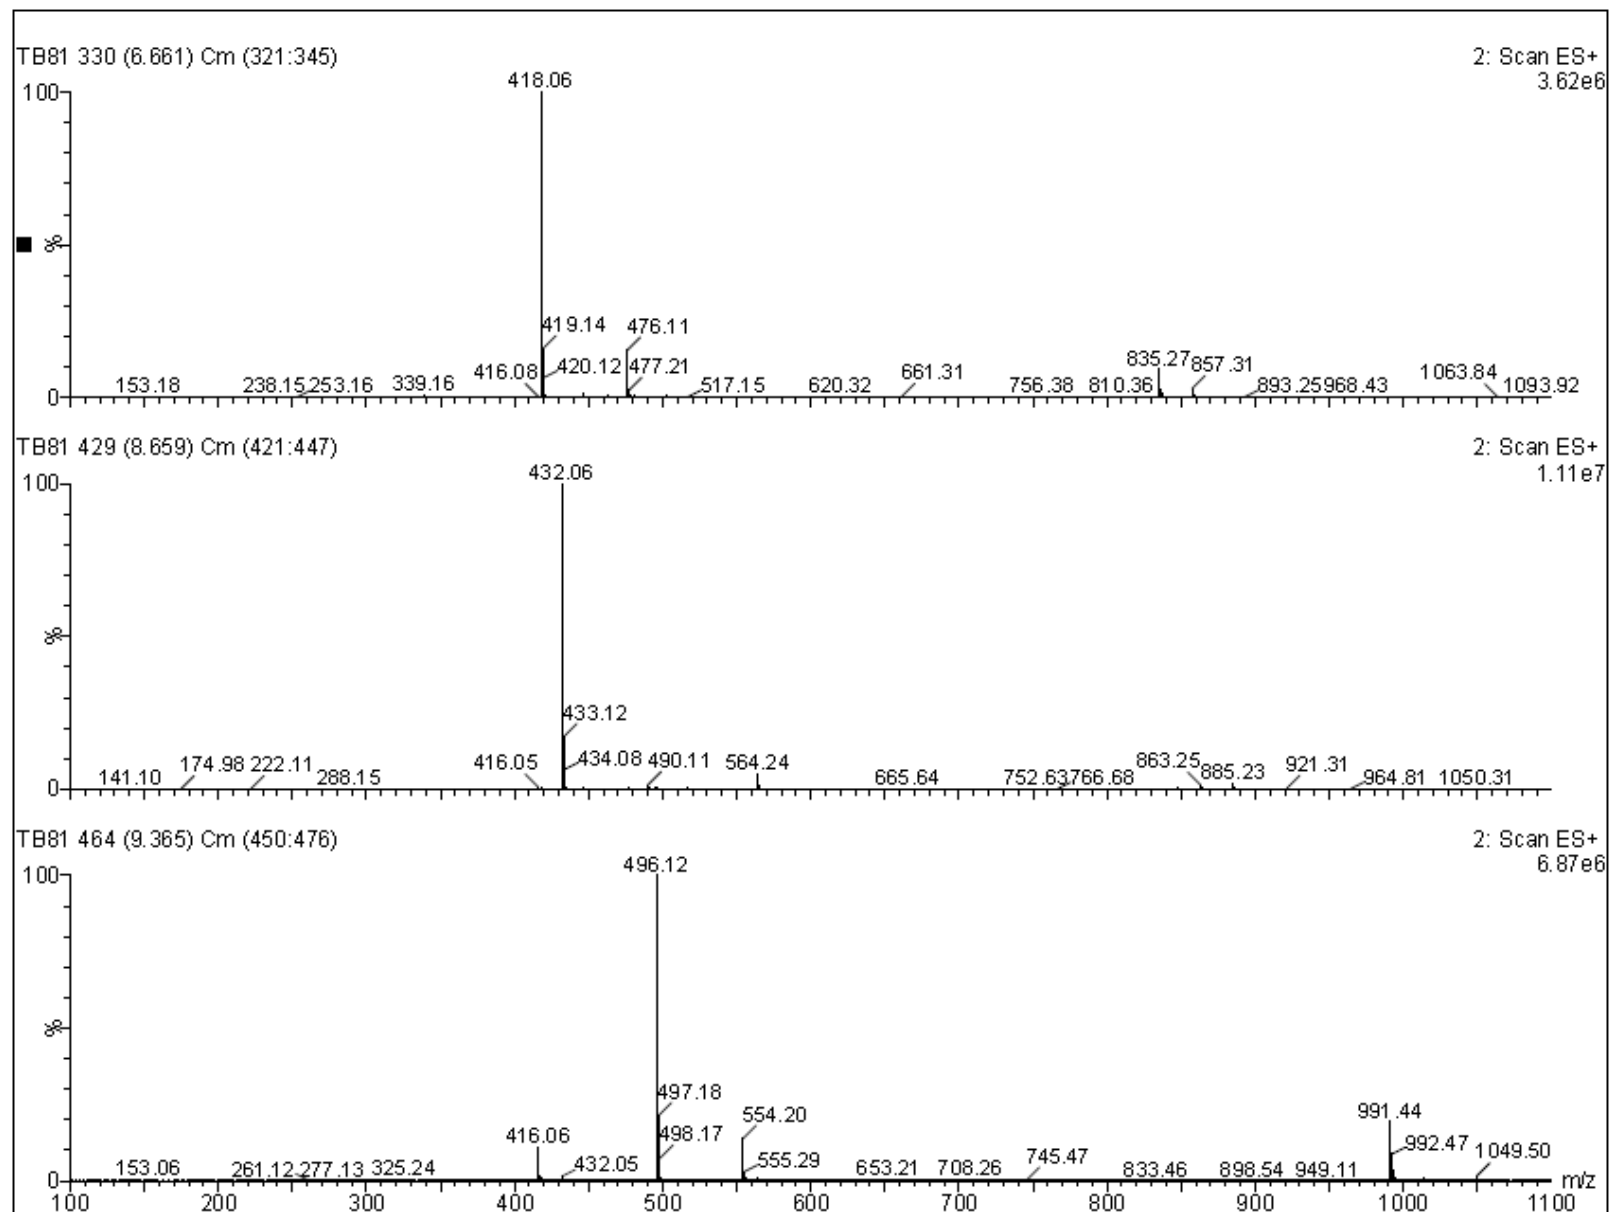

Reaction of **11** with potassium cyanide in presence of terpinene at rt in CH<sub>3</sub>CN/H<sub>2</sub>O.

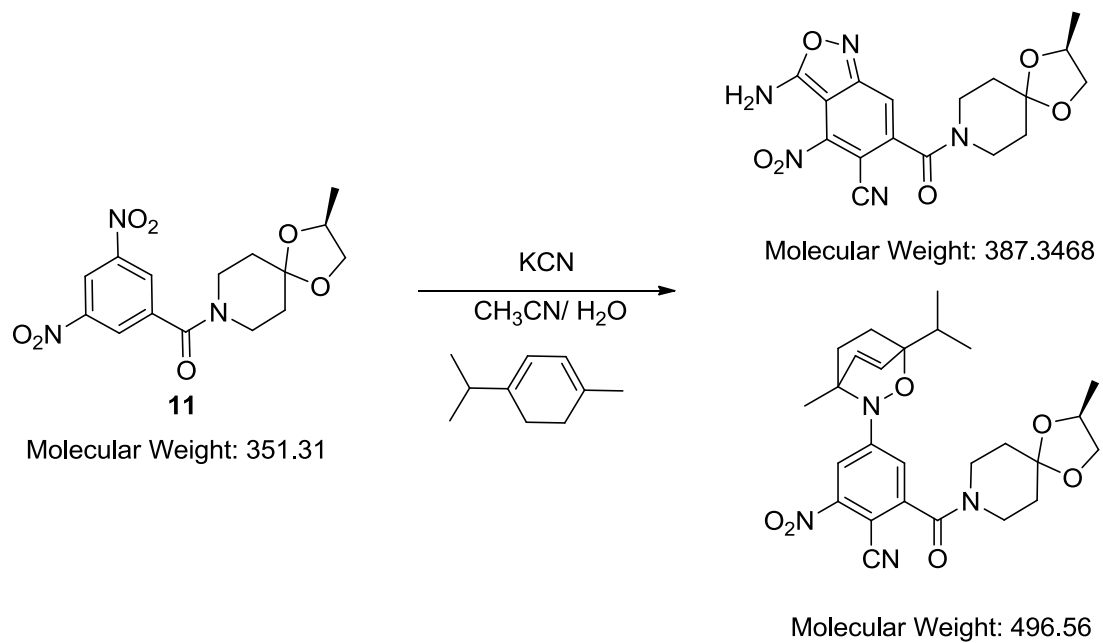



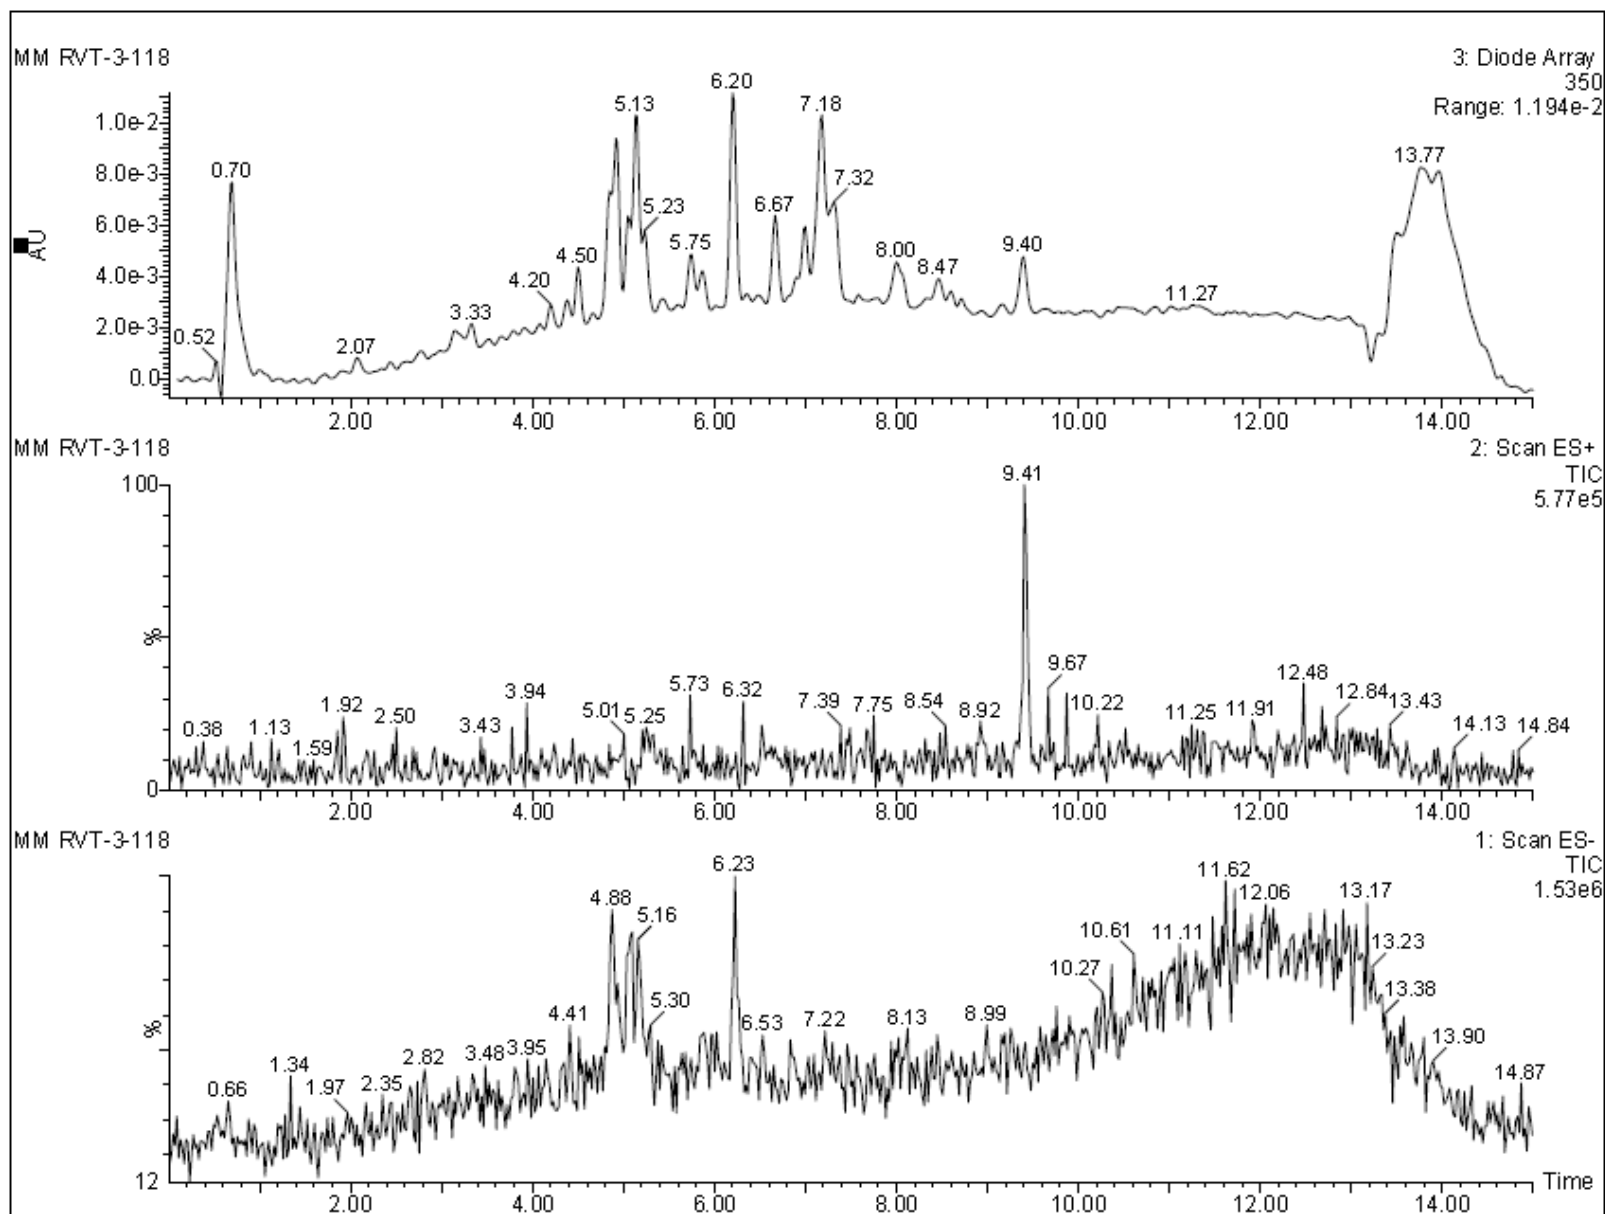

Mass spectra in the positive and the negative ionization mode

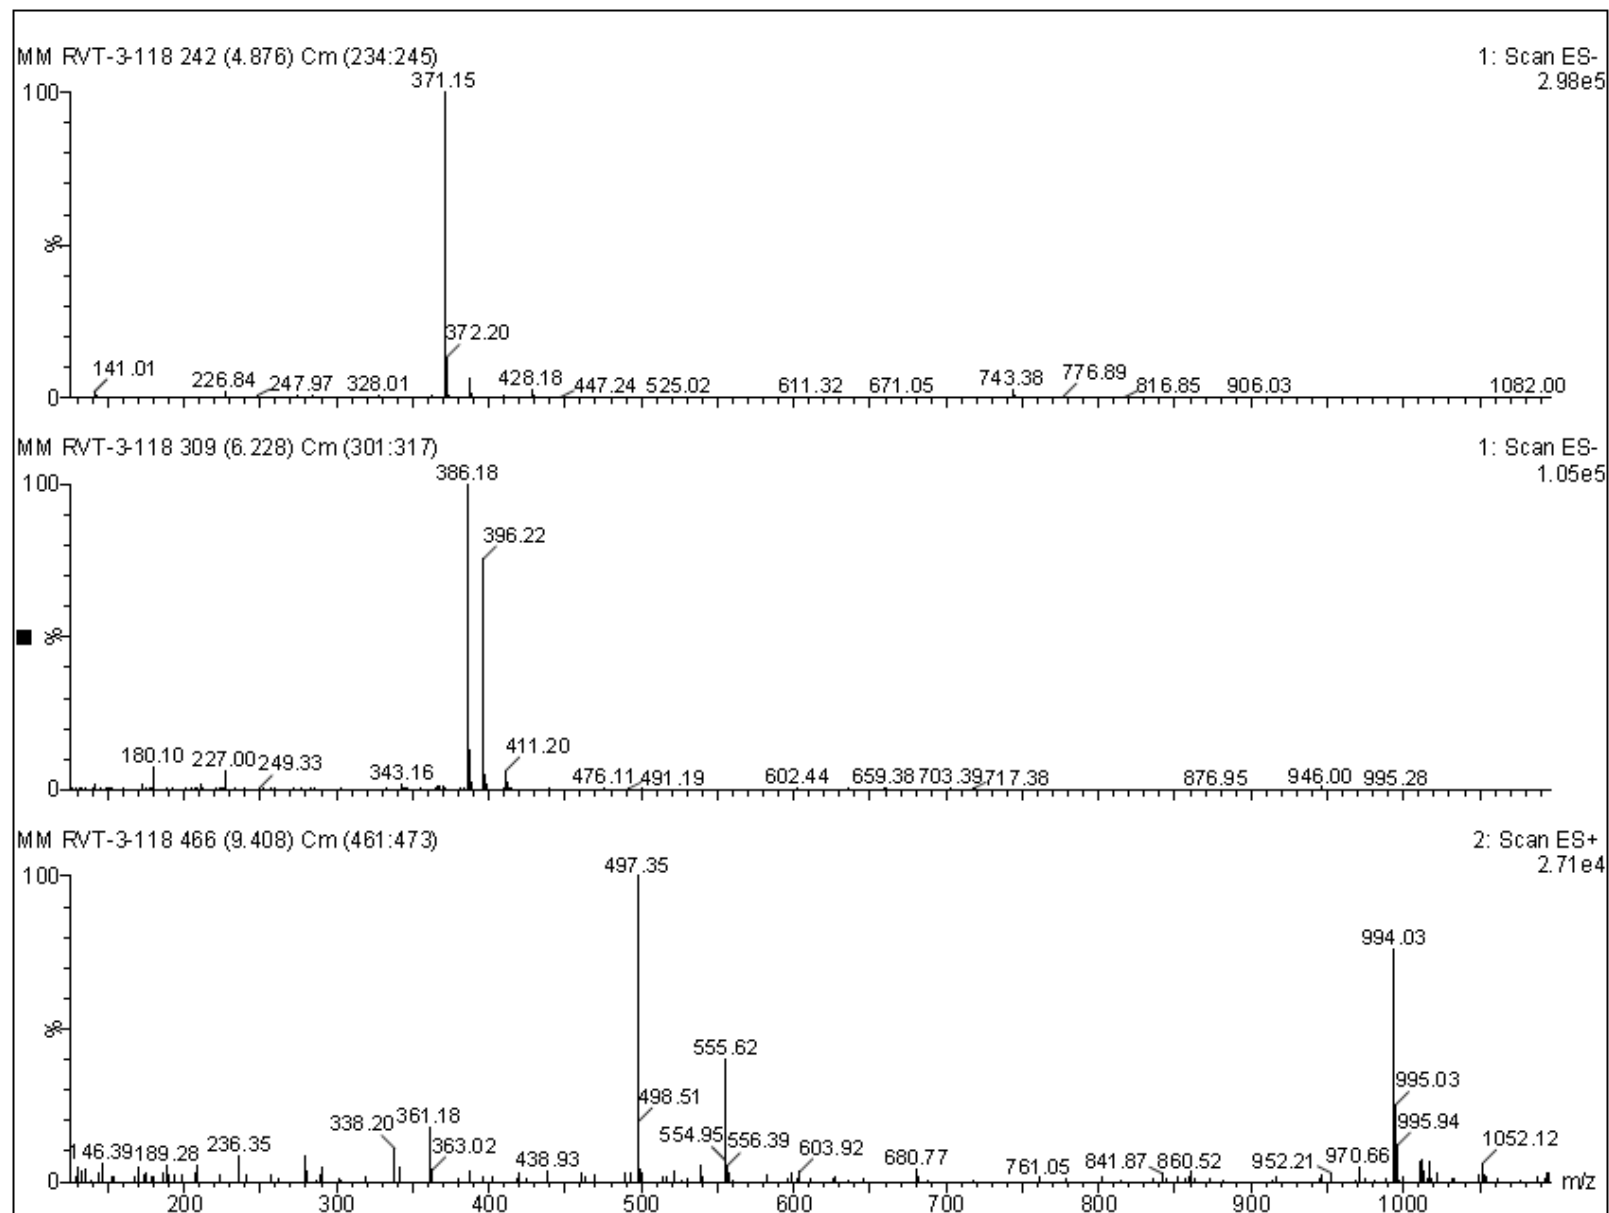

Trapping of the in situ generated nitroso intermediate of **11** by Sodium triacetoxy borohydride ( $\text{NaBH}(\text{OAc})_3$ ) in THF using 1,3-Cyclohexadiene to afford **46** under inert atmosphere

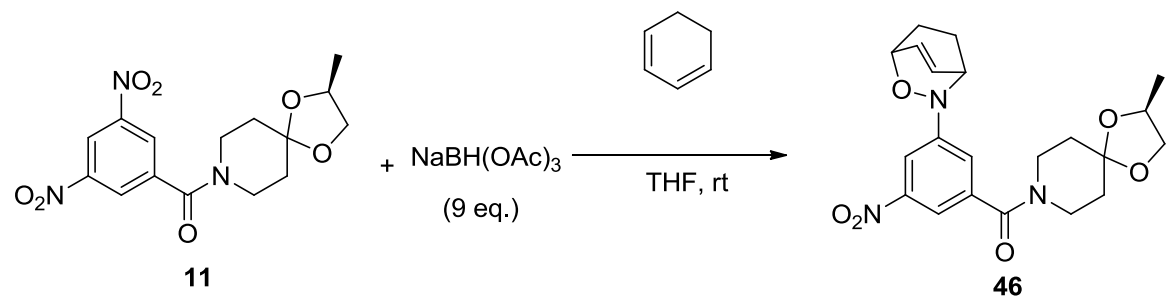

Exact Mass: 415.17434  
Molecular Weight: 415.43970

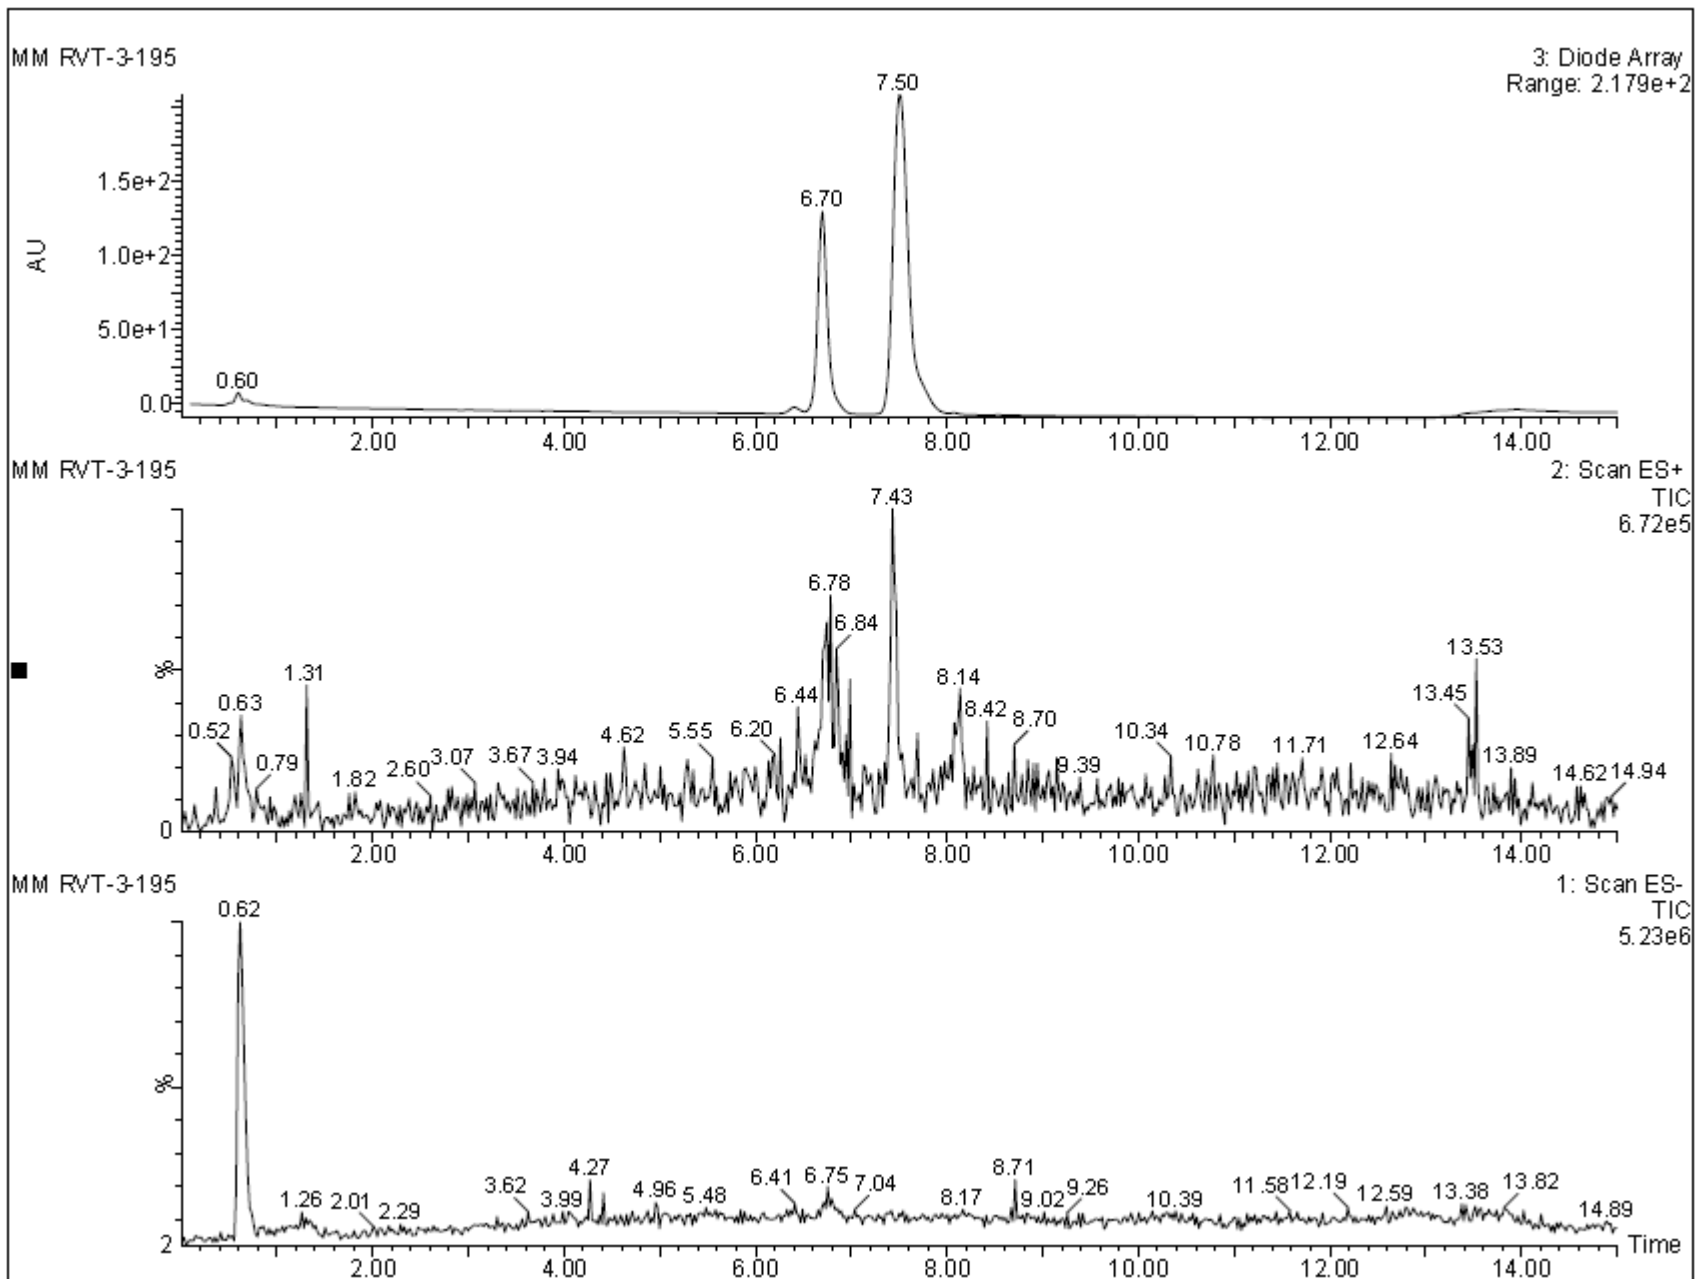

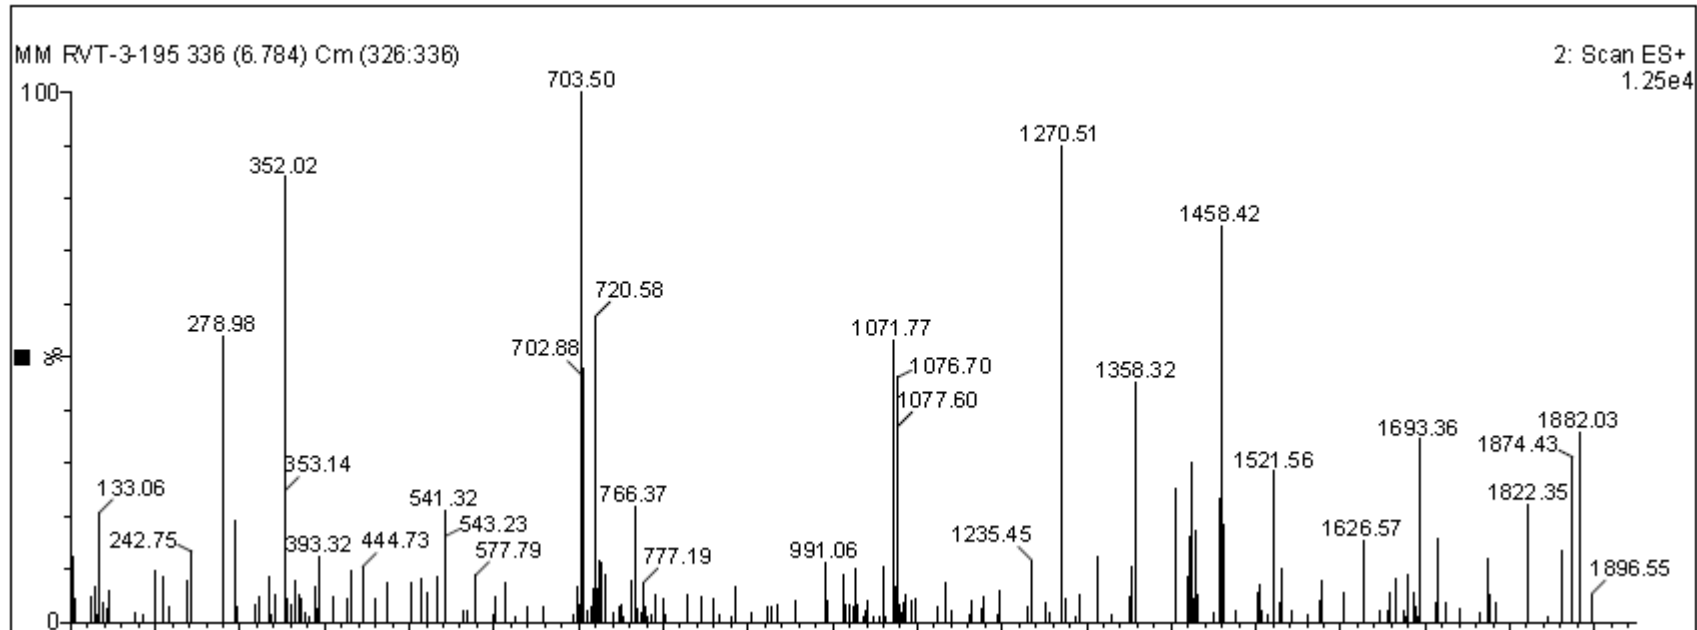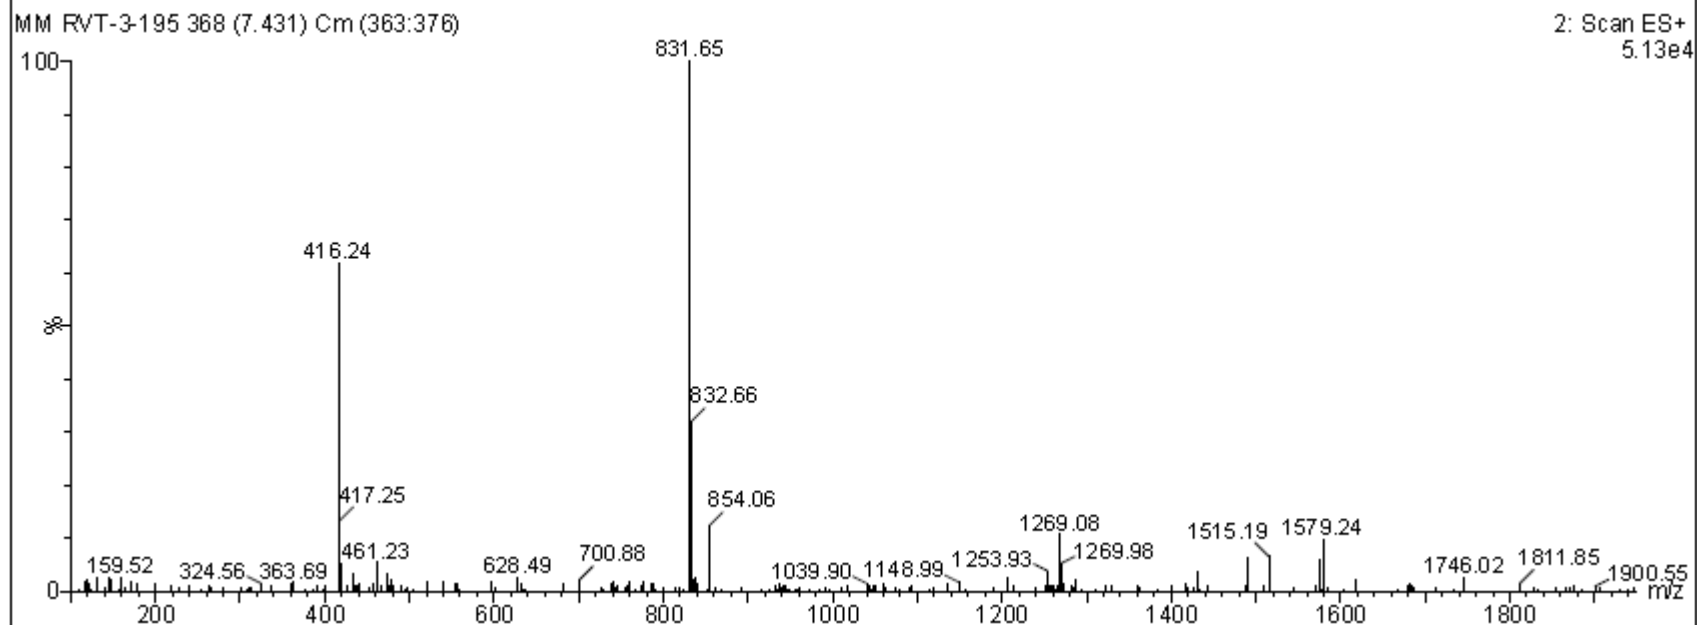

RVT-Dinitro-TB-amide\_103001r.esp

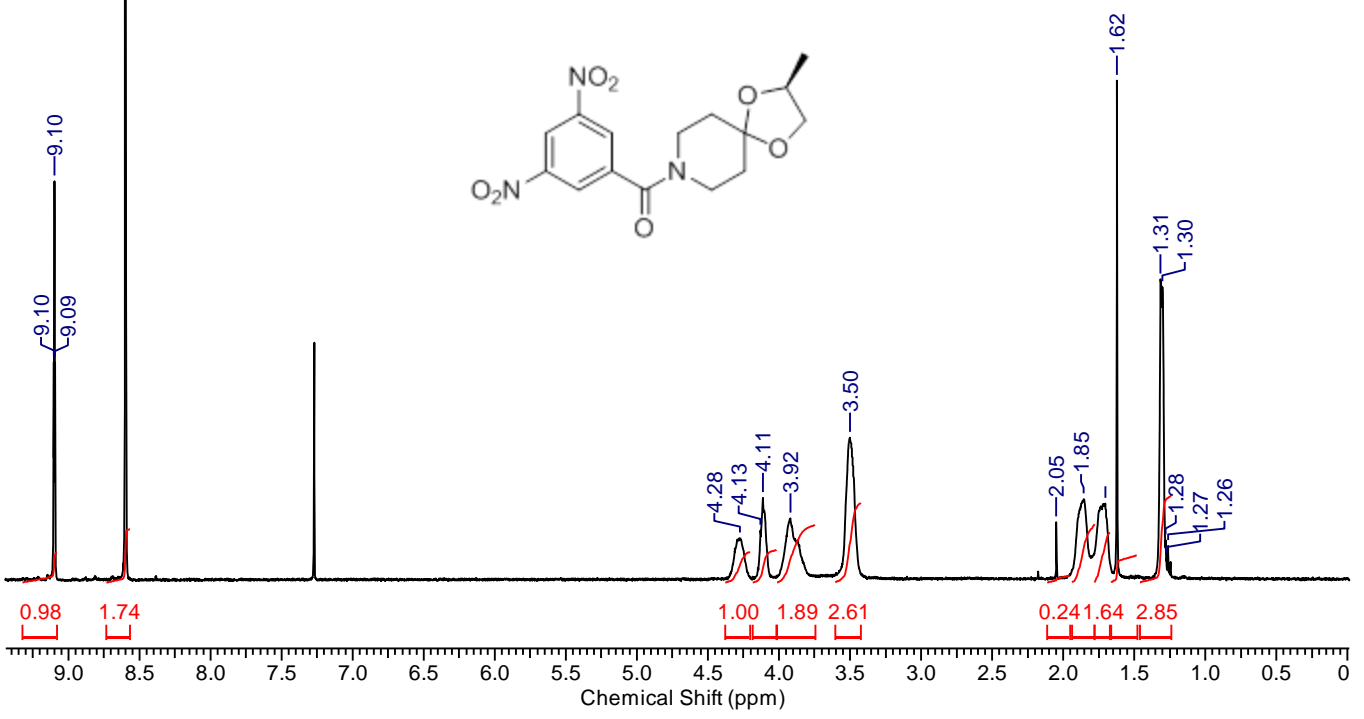

RVT-Dinitro-TB-amide\_102001r.esp

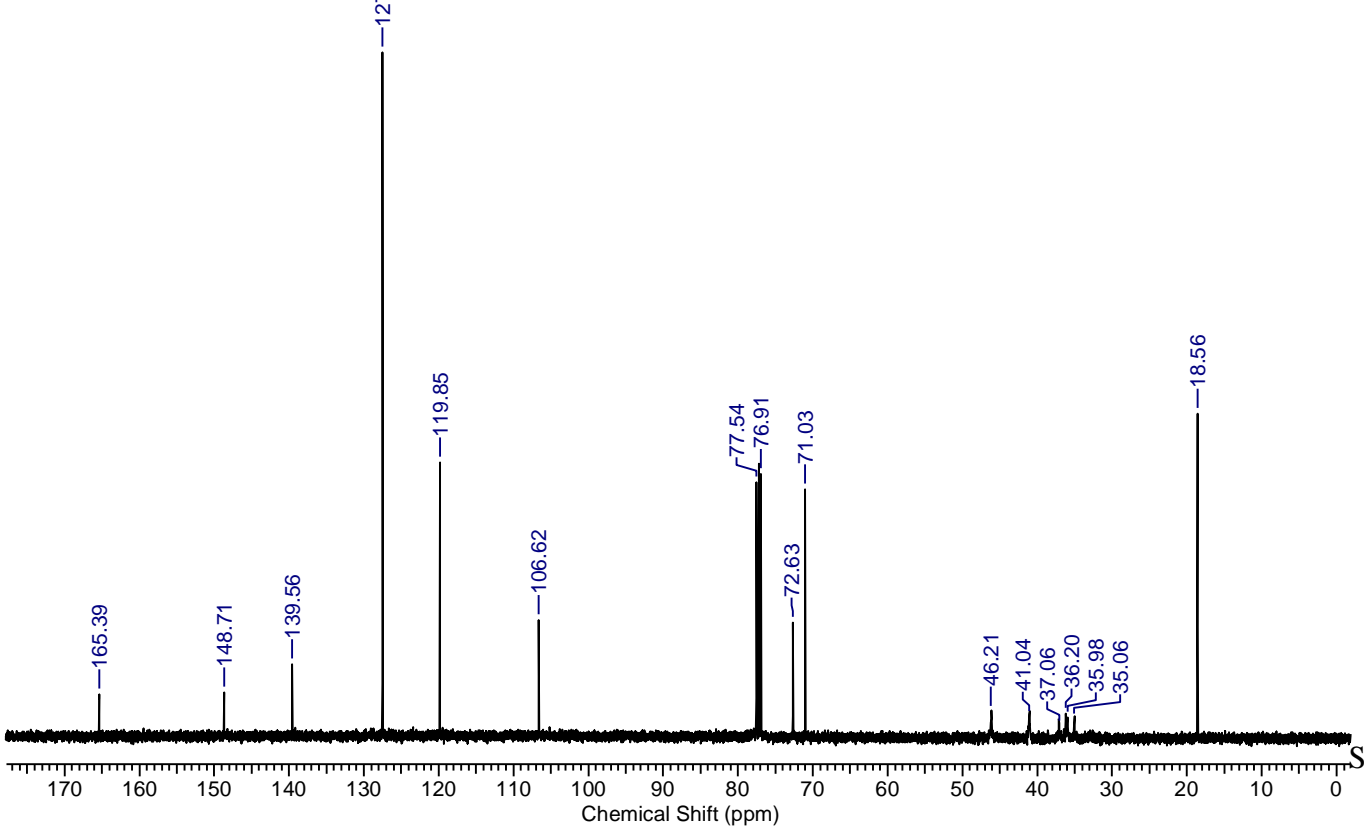

gm21-94-1H-500

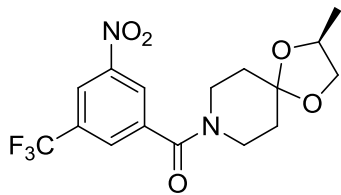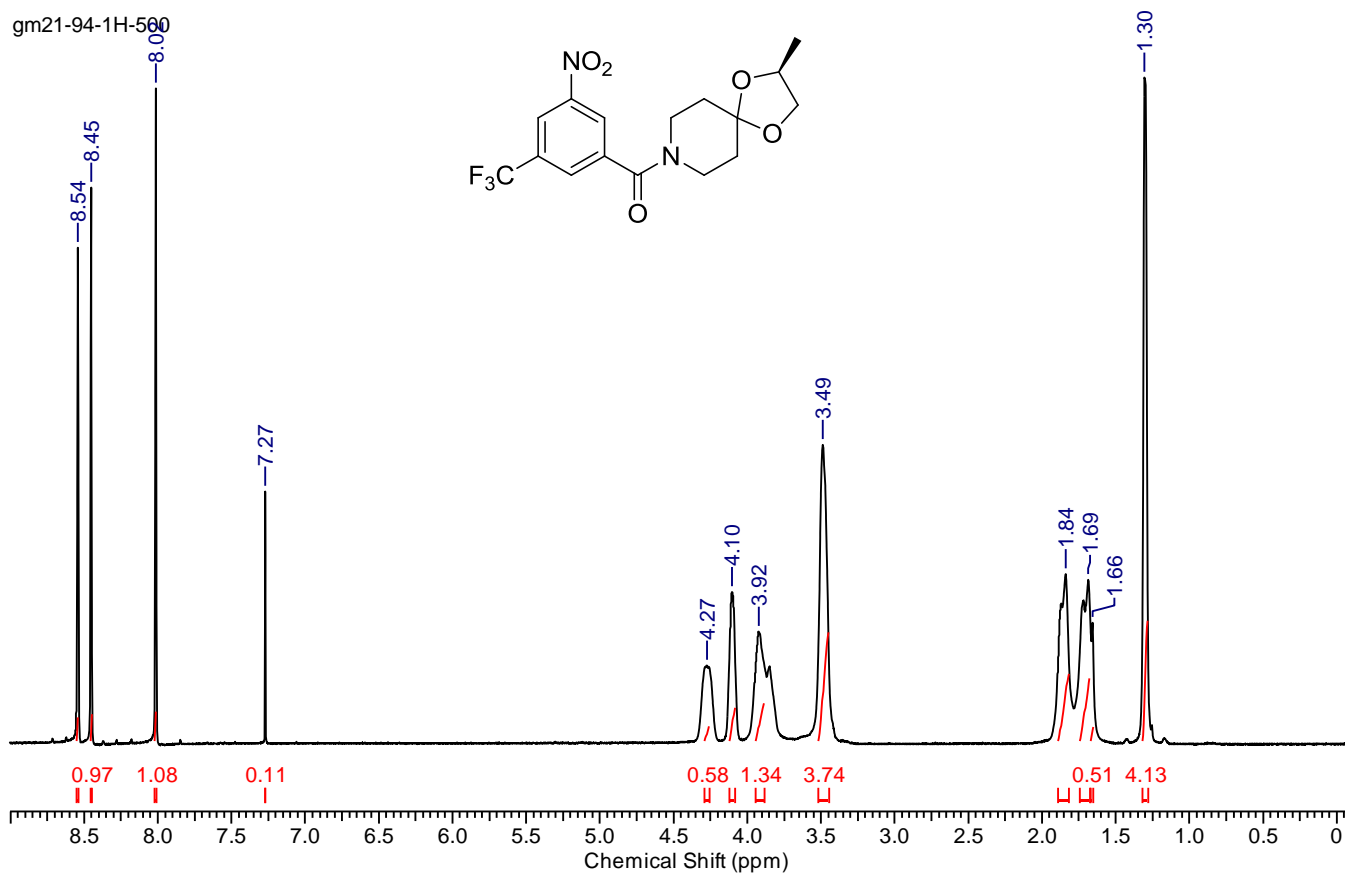

gm21-94-13C

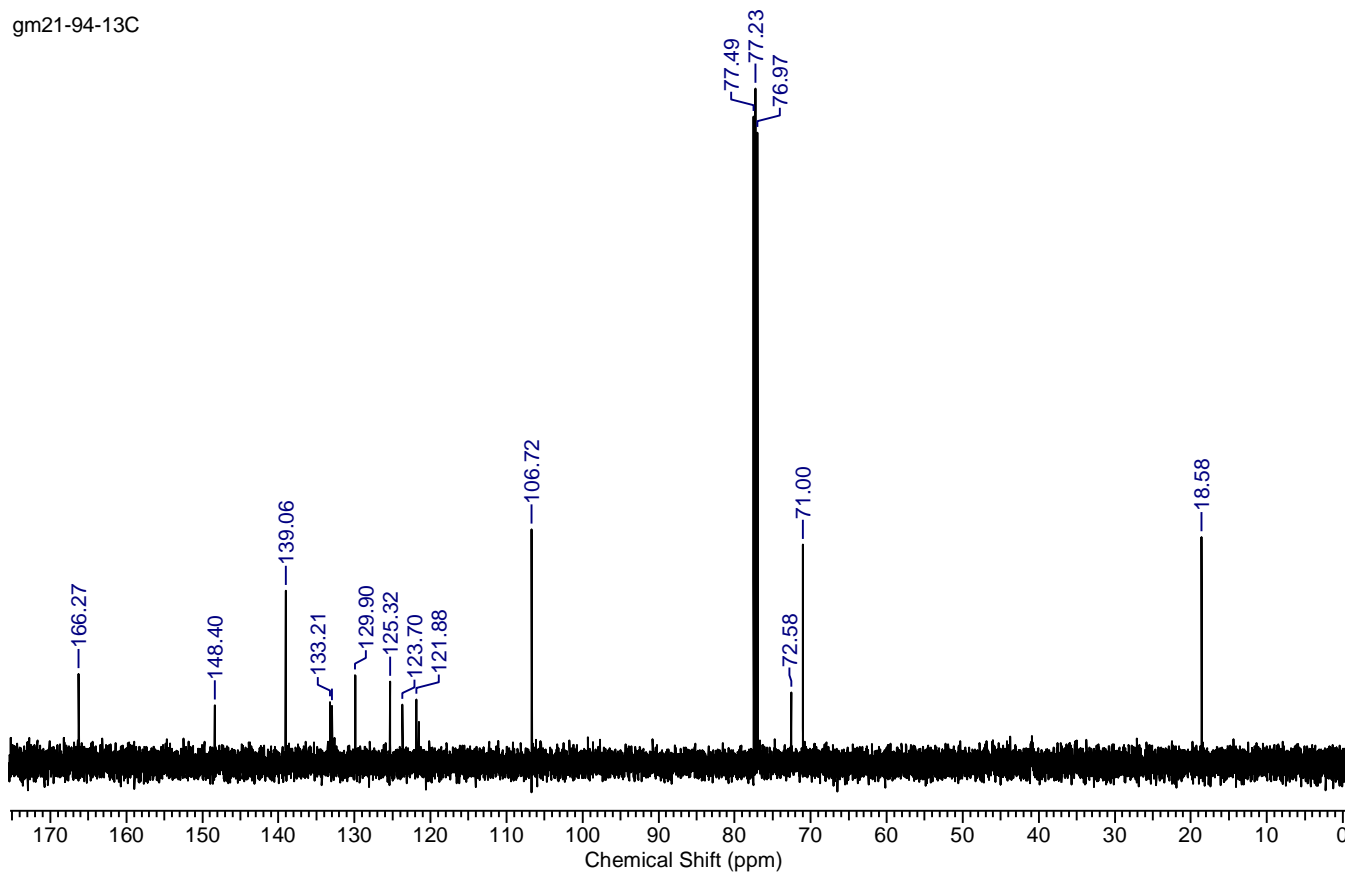

RVT-3-84\_1\_001001r-1.esp

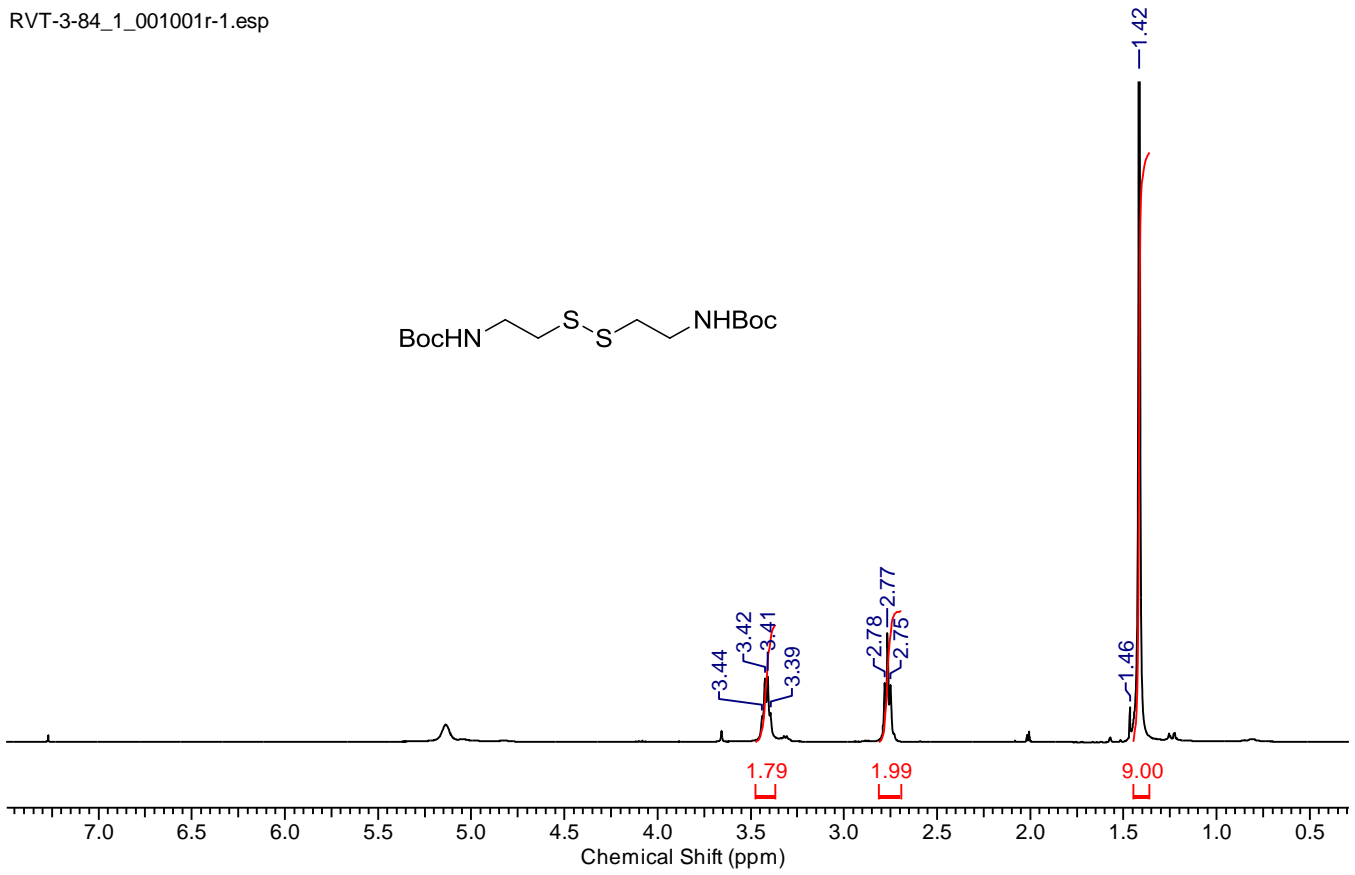

RVT-3-84\_1\_002001r-1.esp

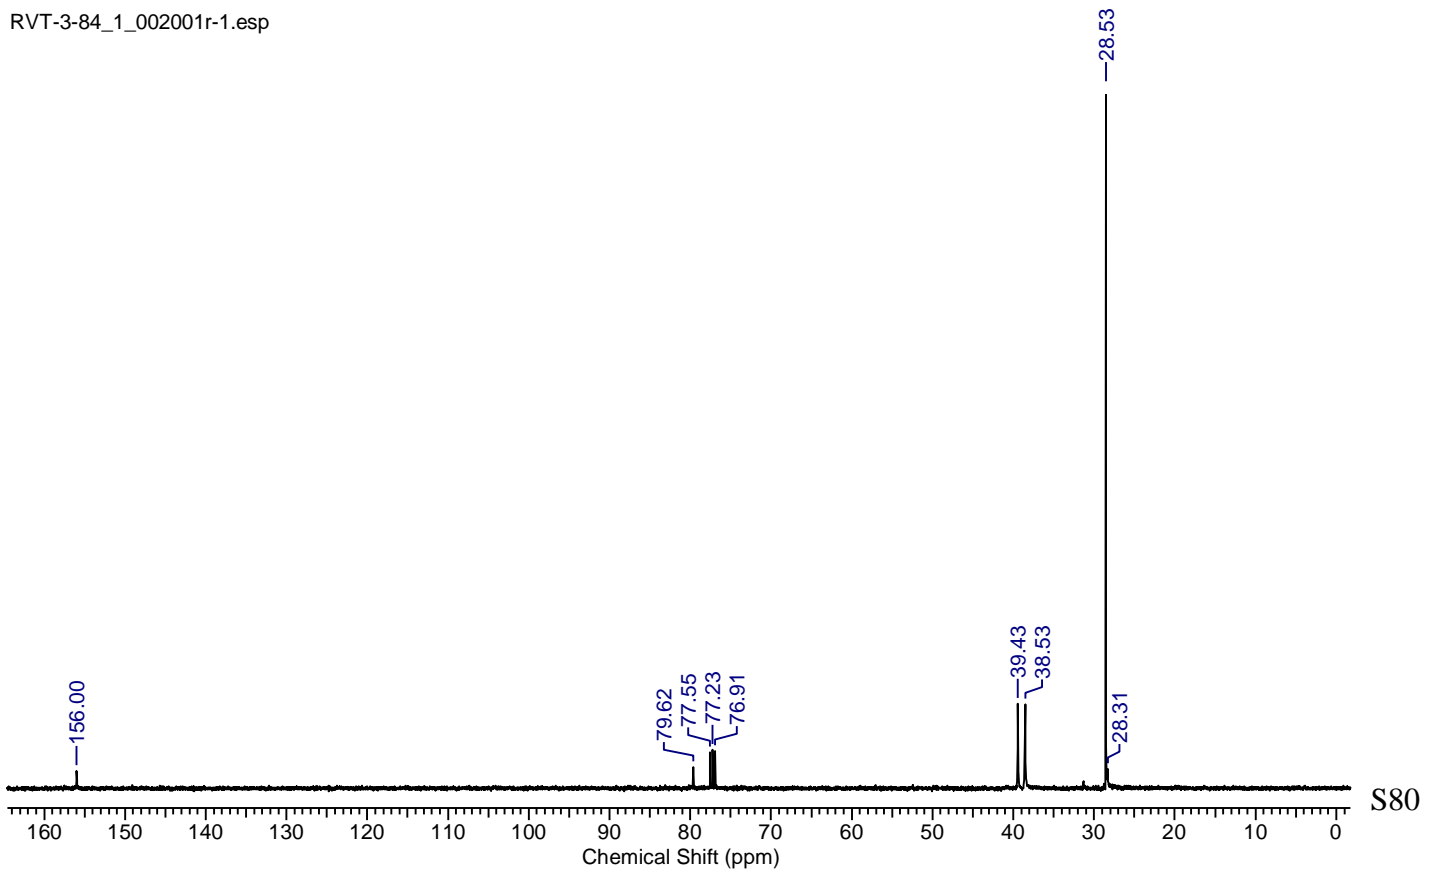



RVT-3-84\_3\_001001r-1.esp

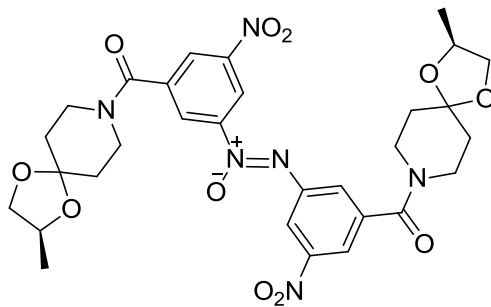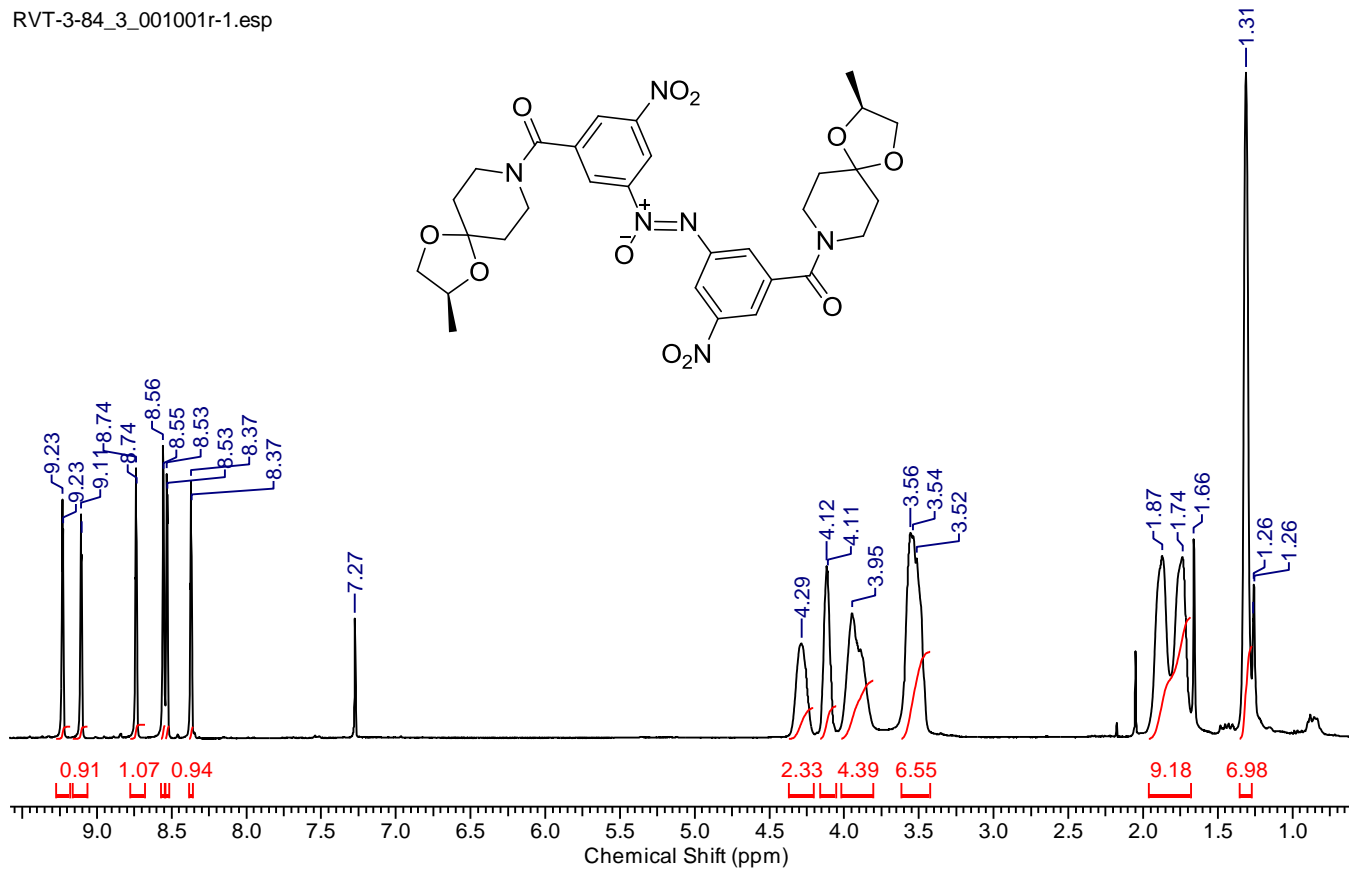

RVT-3-84\_3\_002001r-1.esp

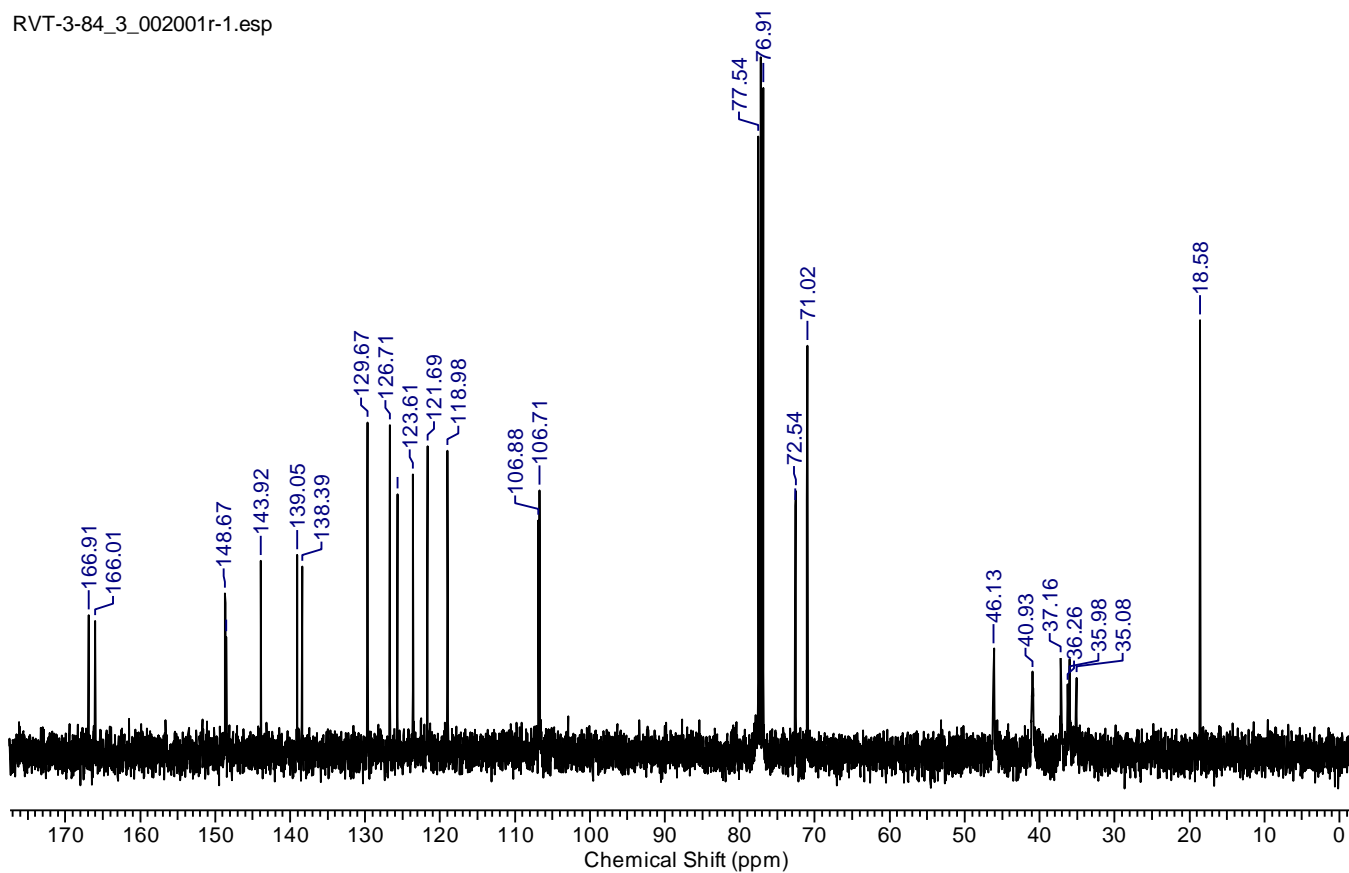

RVT-3-87-88\_004001r-1.esp

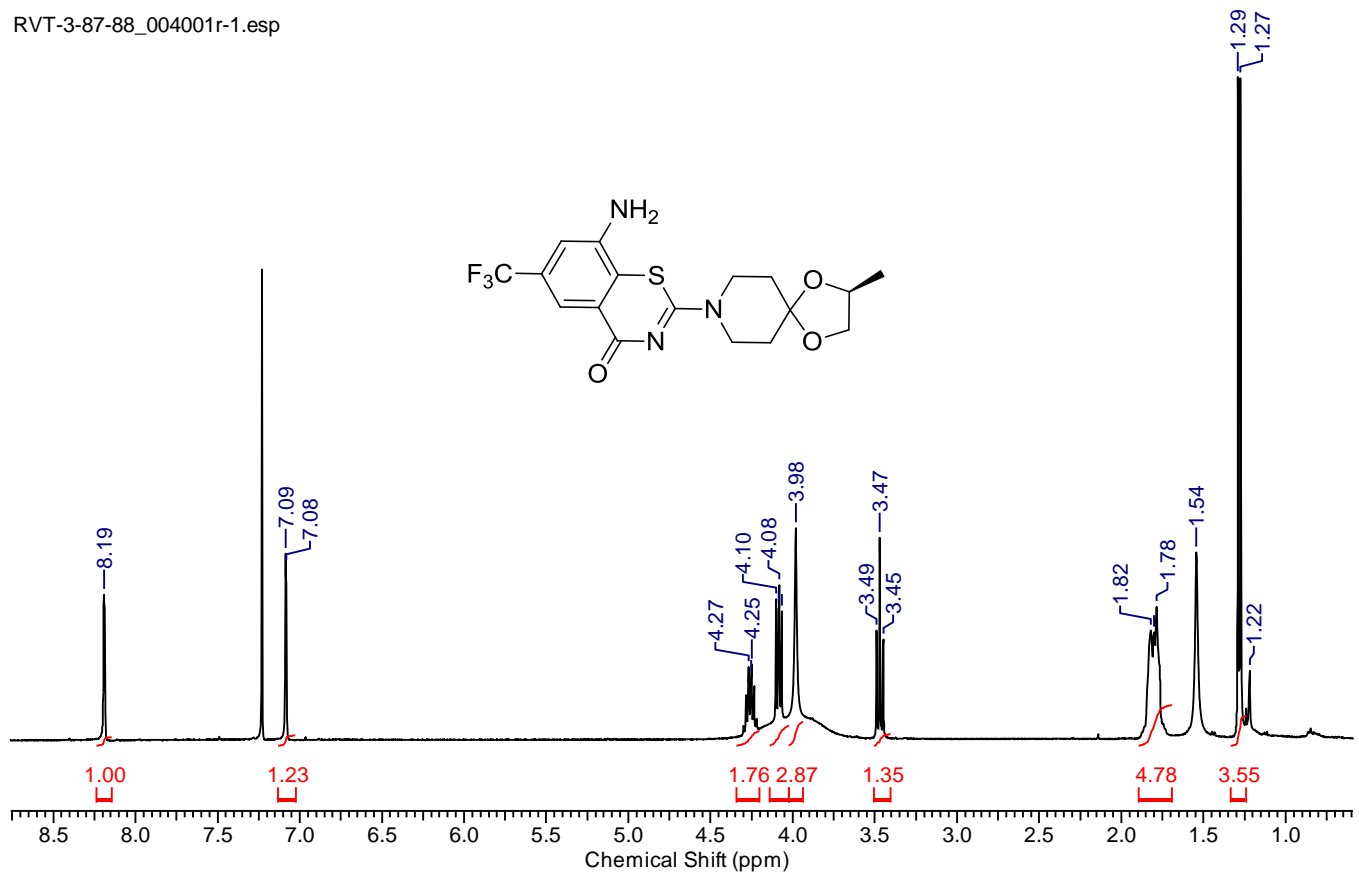

RVT-3-87-88\_003001r.esp

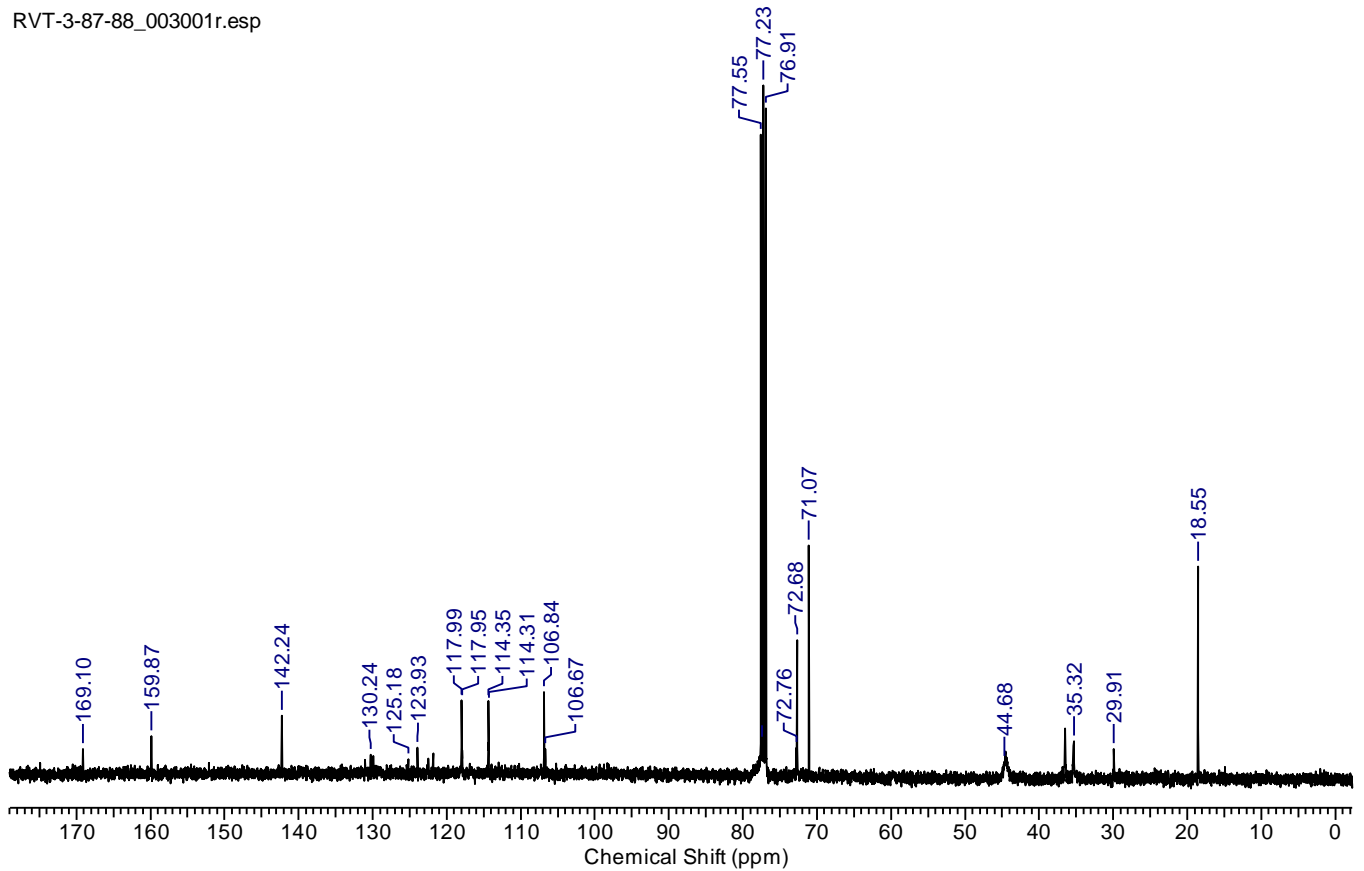

RVT-3-BTZ\_azo.esp

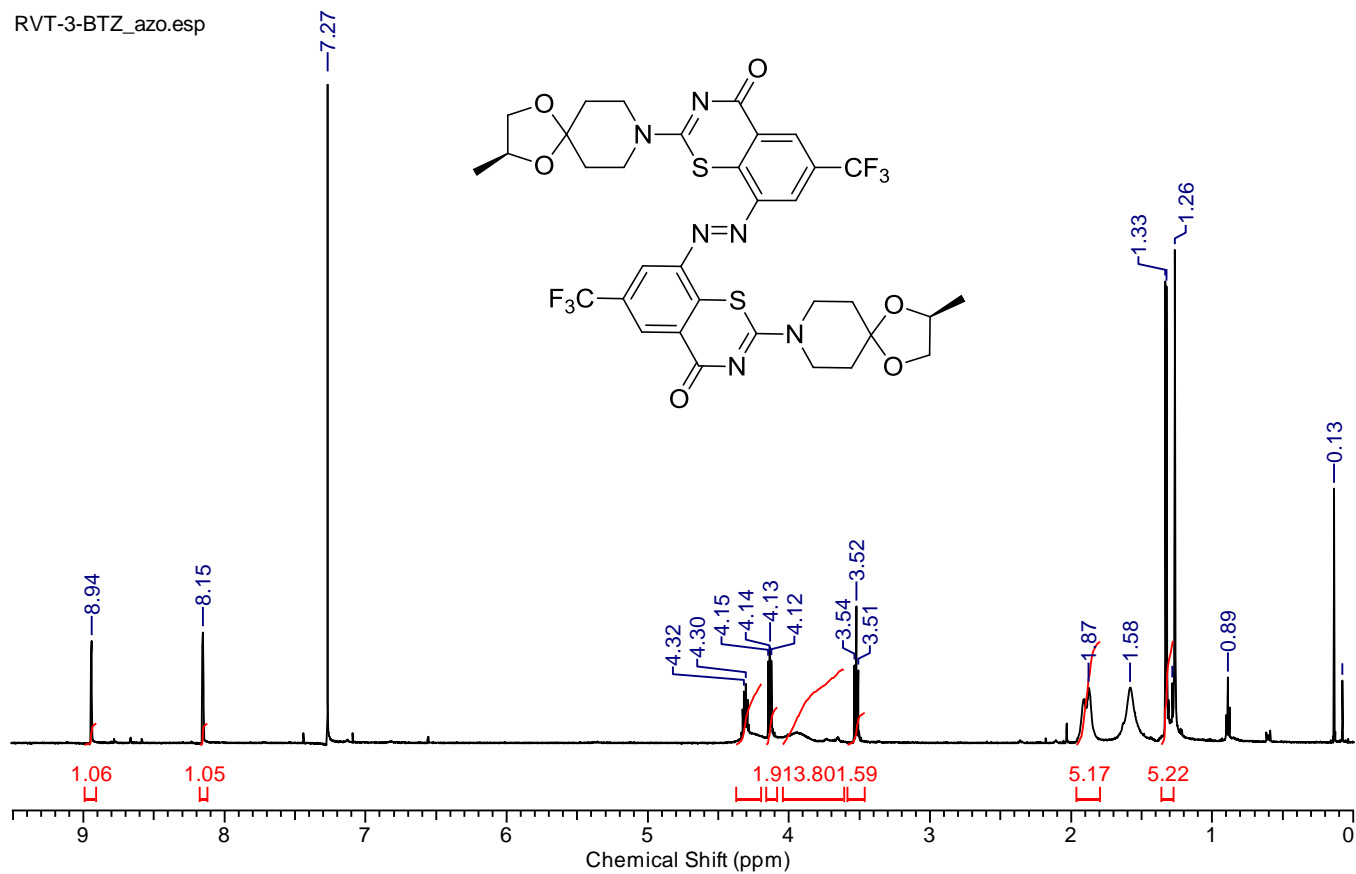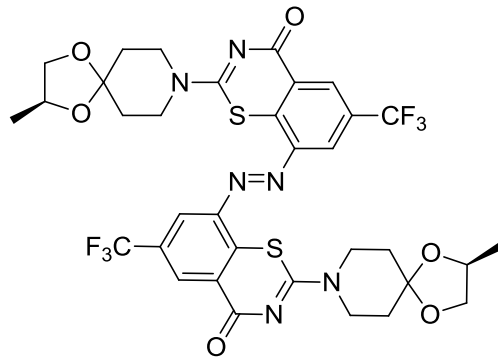

RVT-3-BTZ\_azo\_13C-1.esp

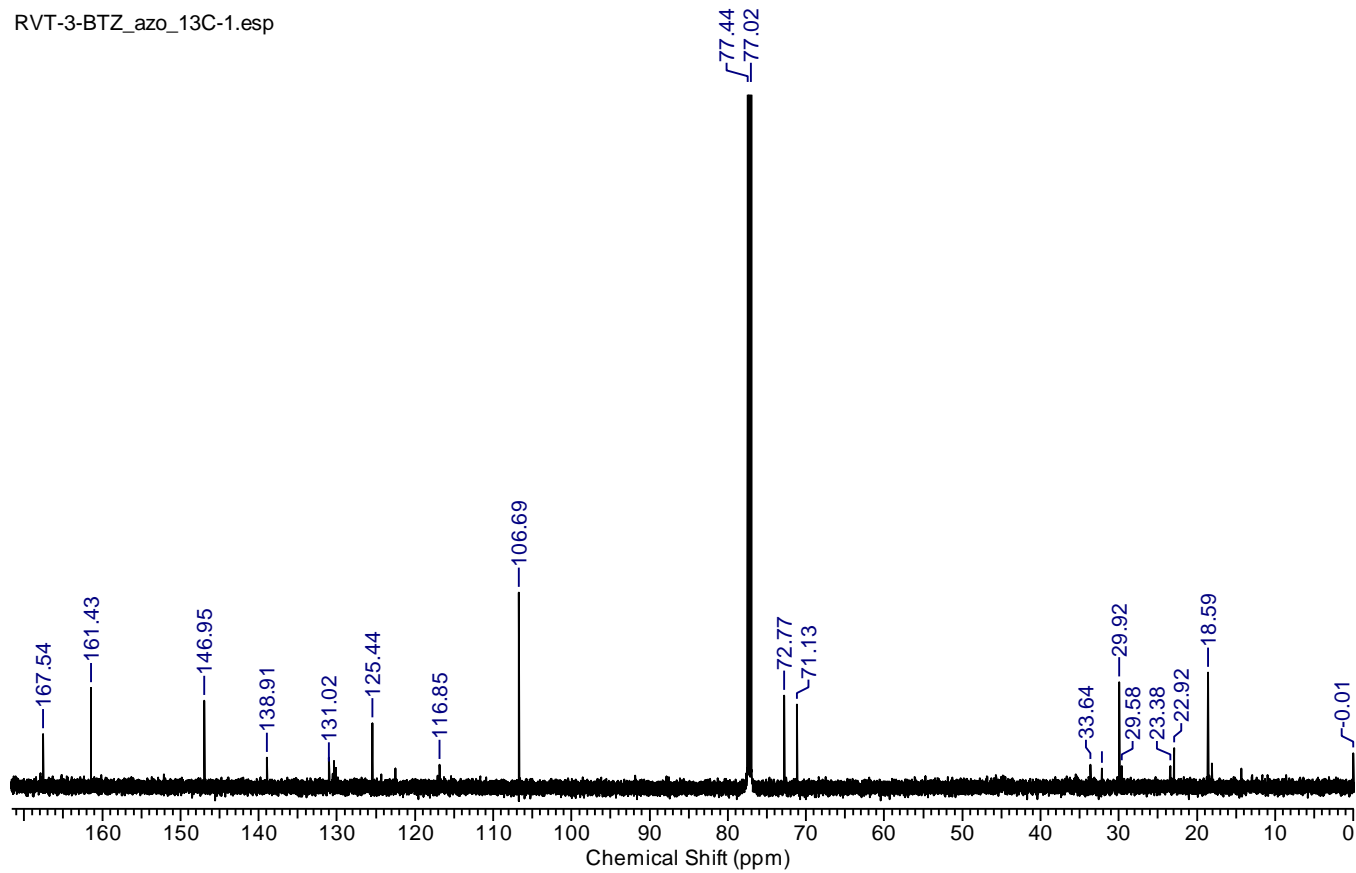

RVT-3-124-1\_001001r-1.esp

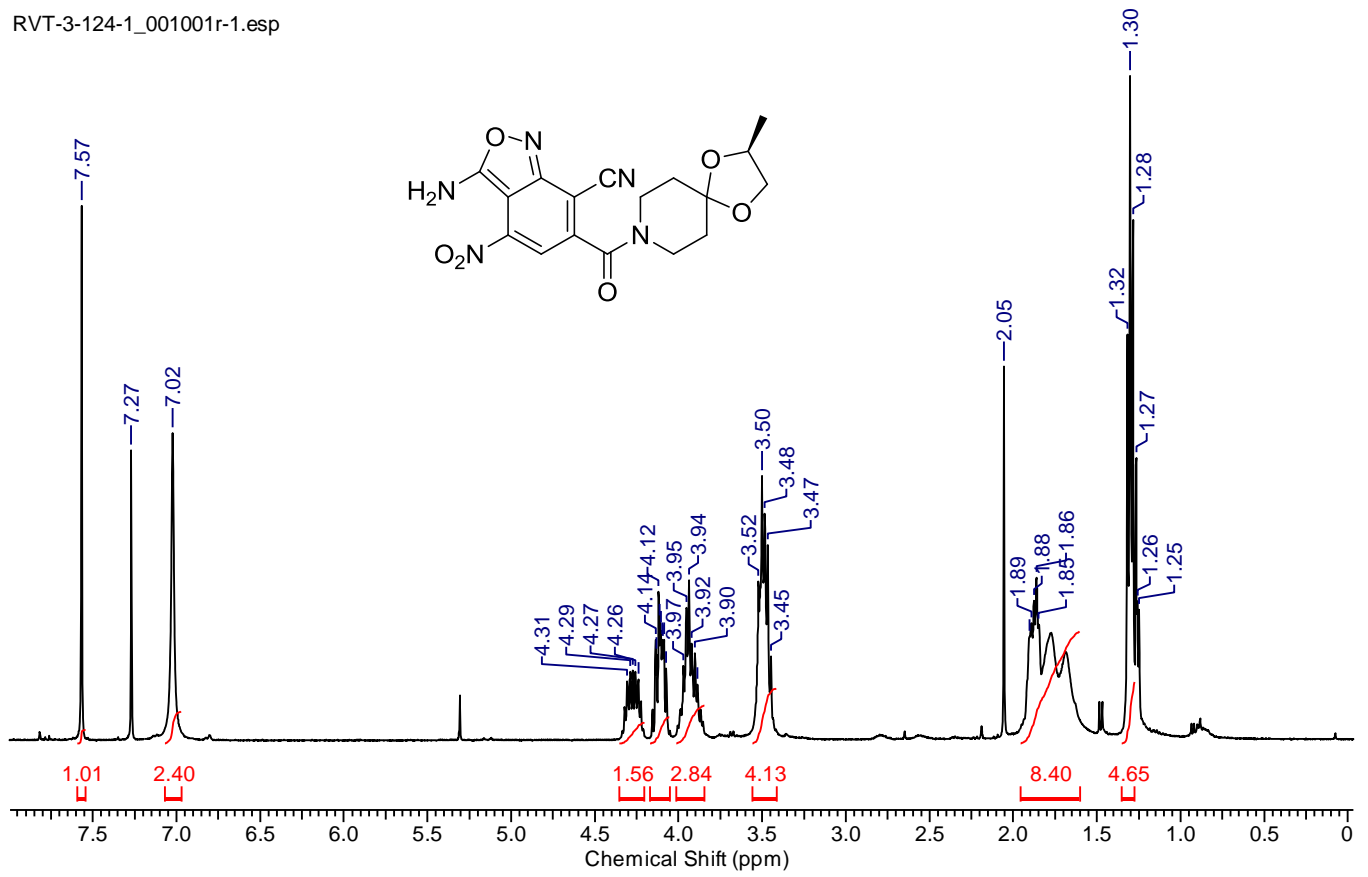

RVT-3-124-1\_002001r.esp

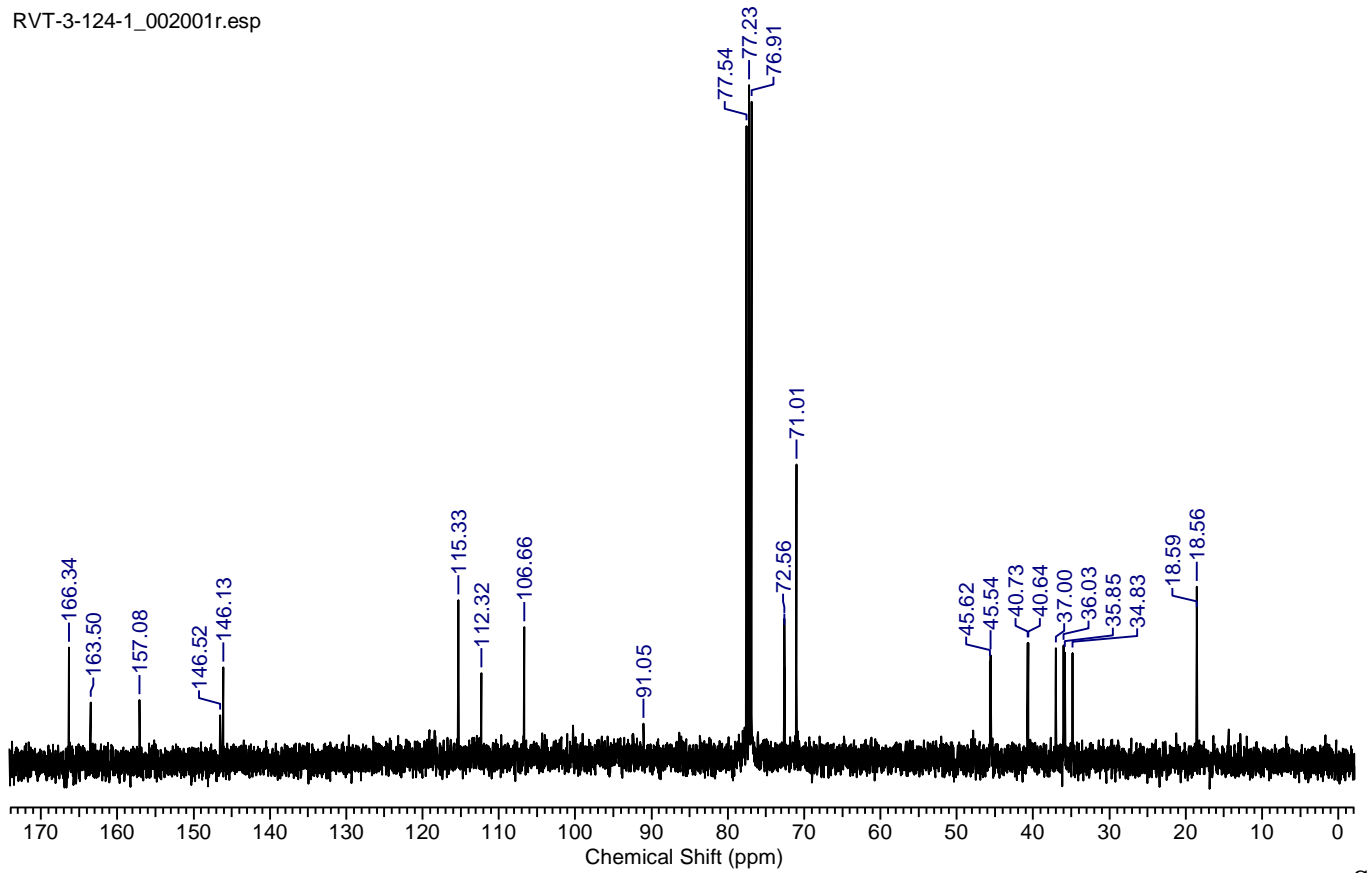

RVT-3-124-2\_001001r\_1H.esp

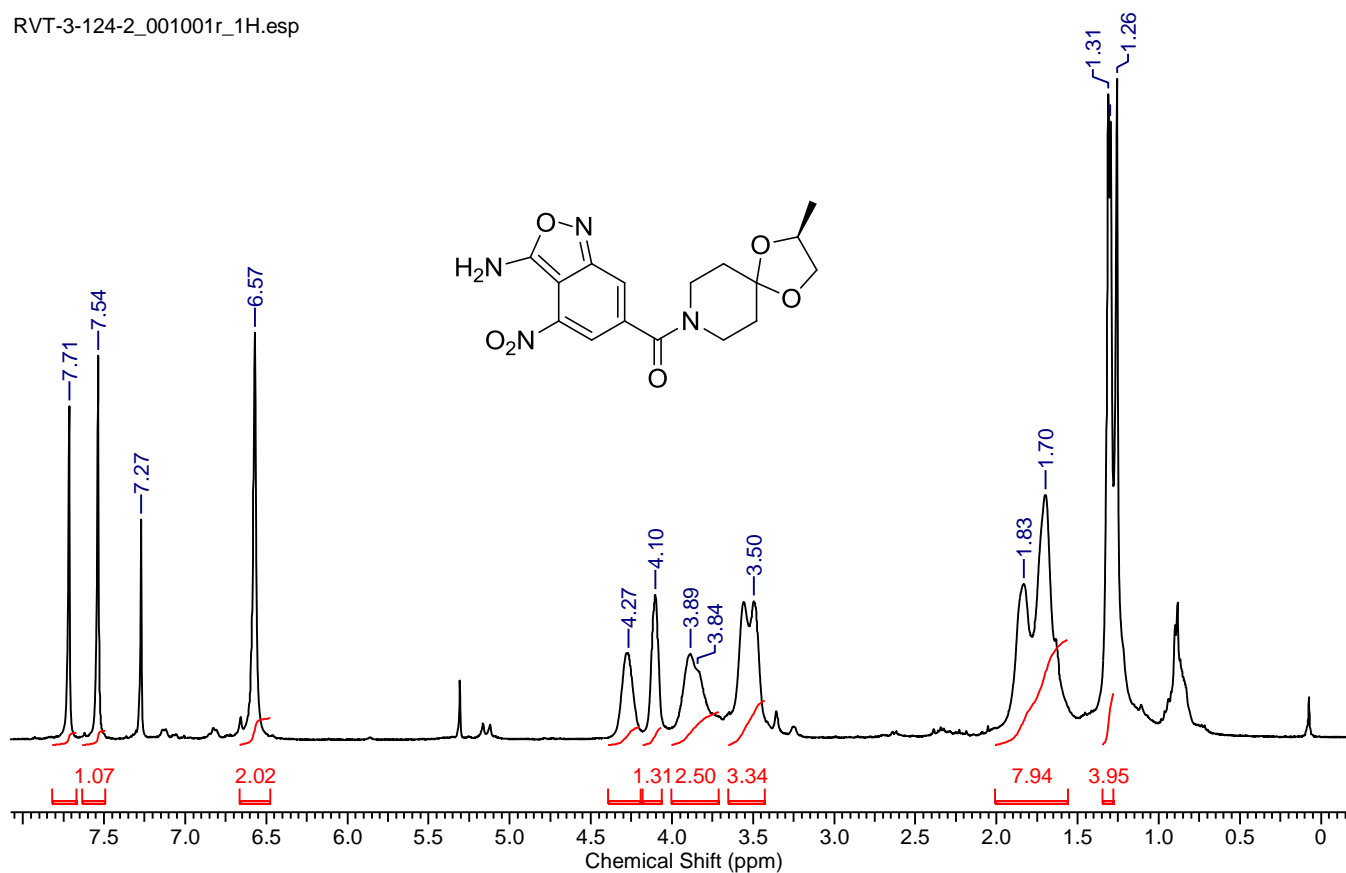

RVT-3-124-2\_003001r\_13C.esp

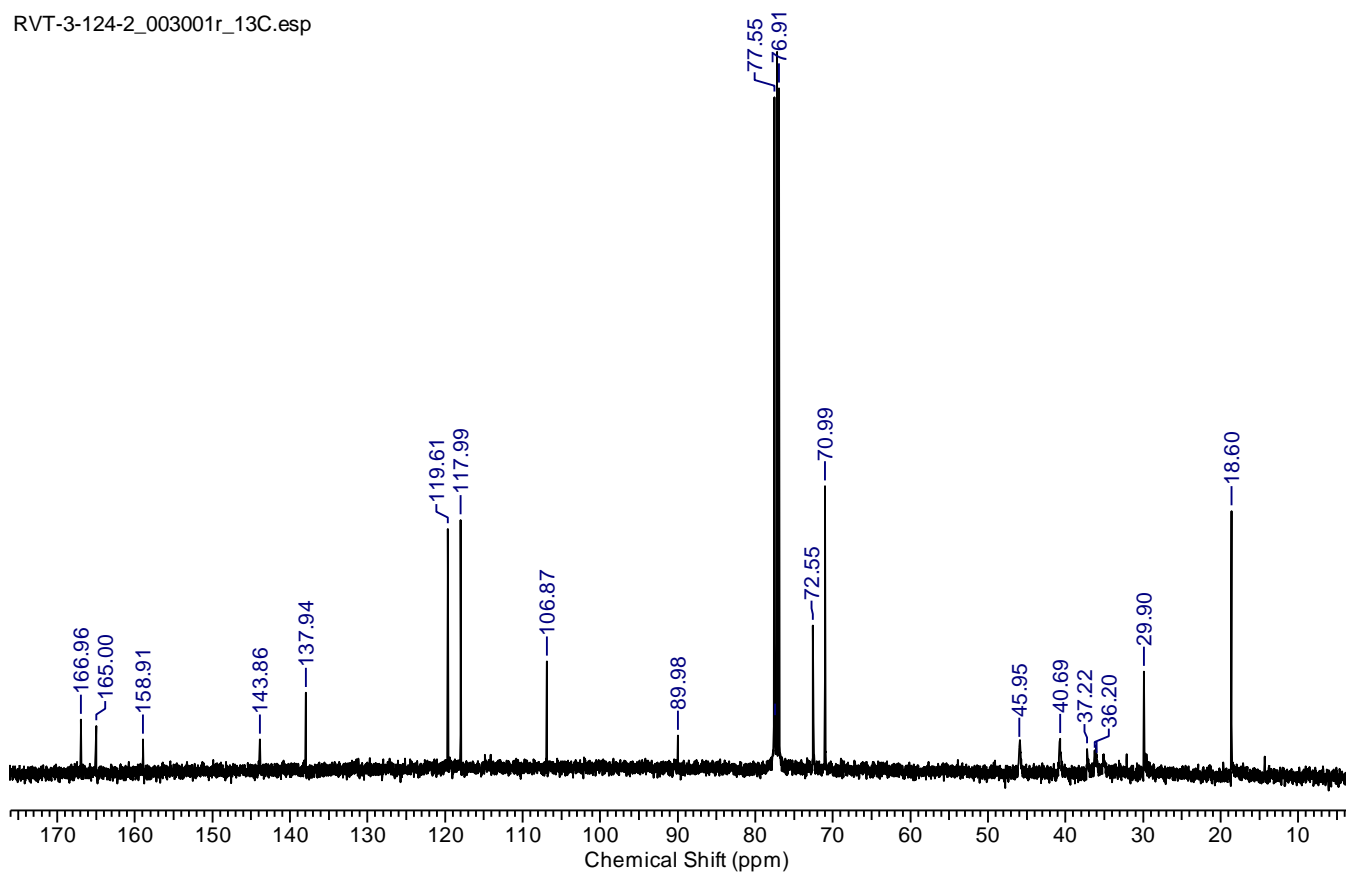

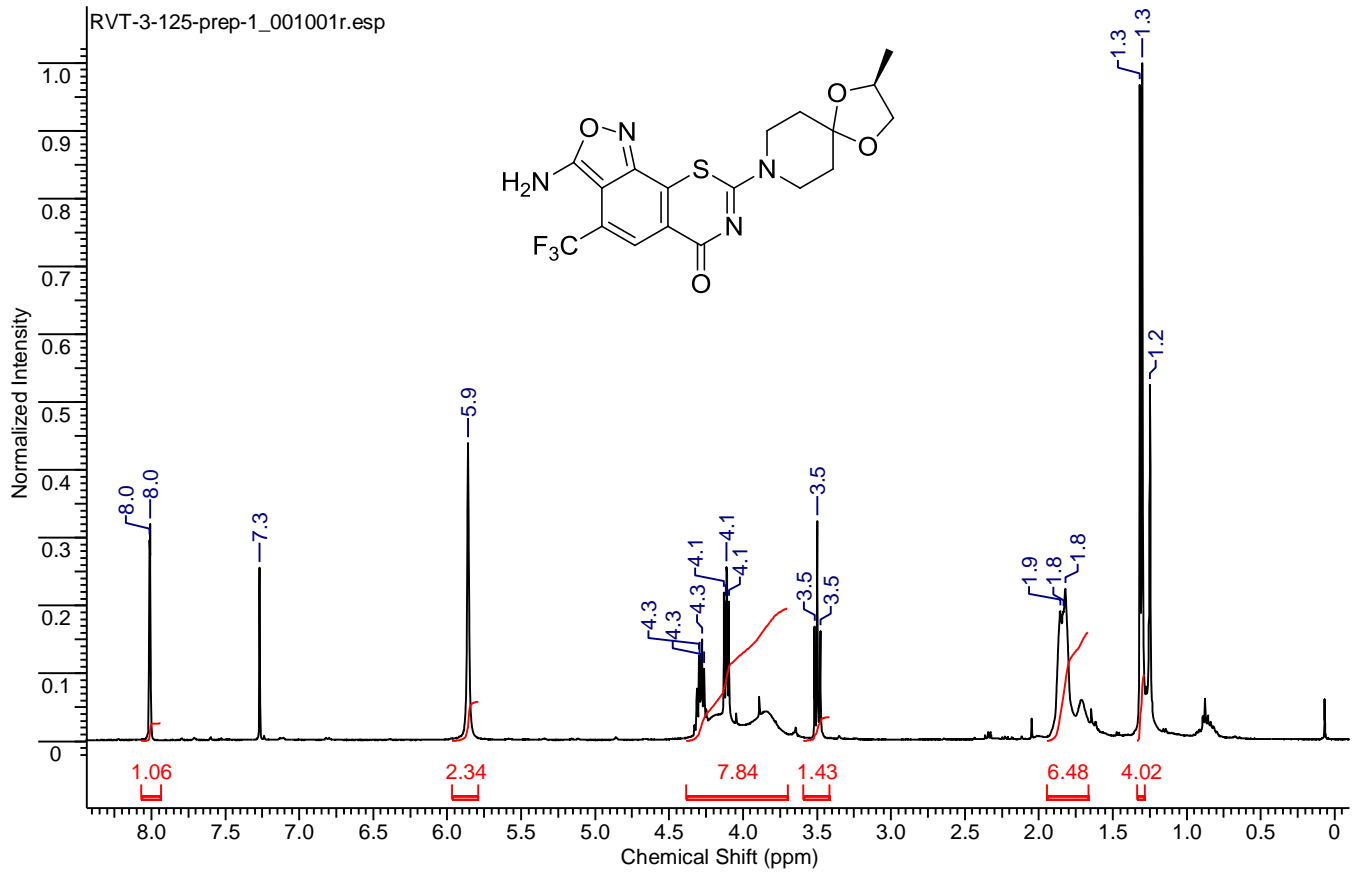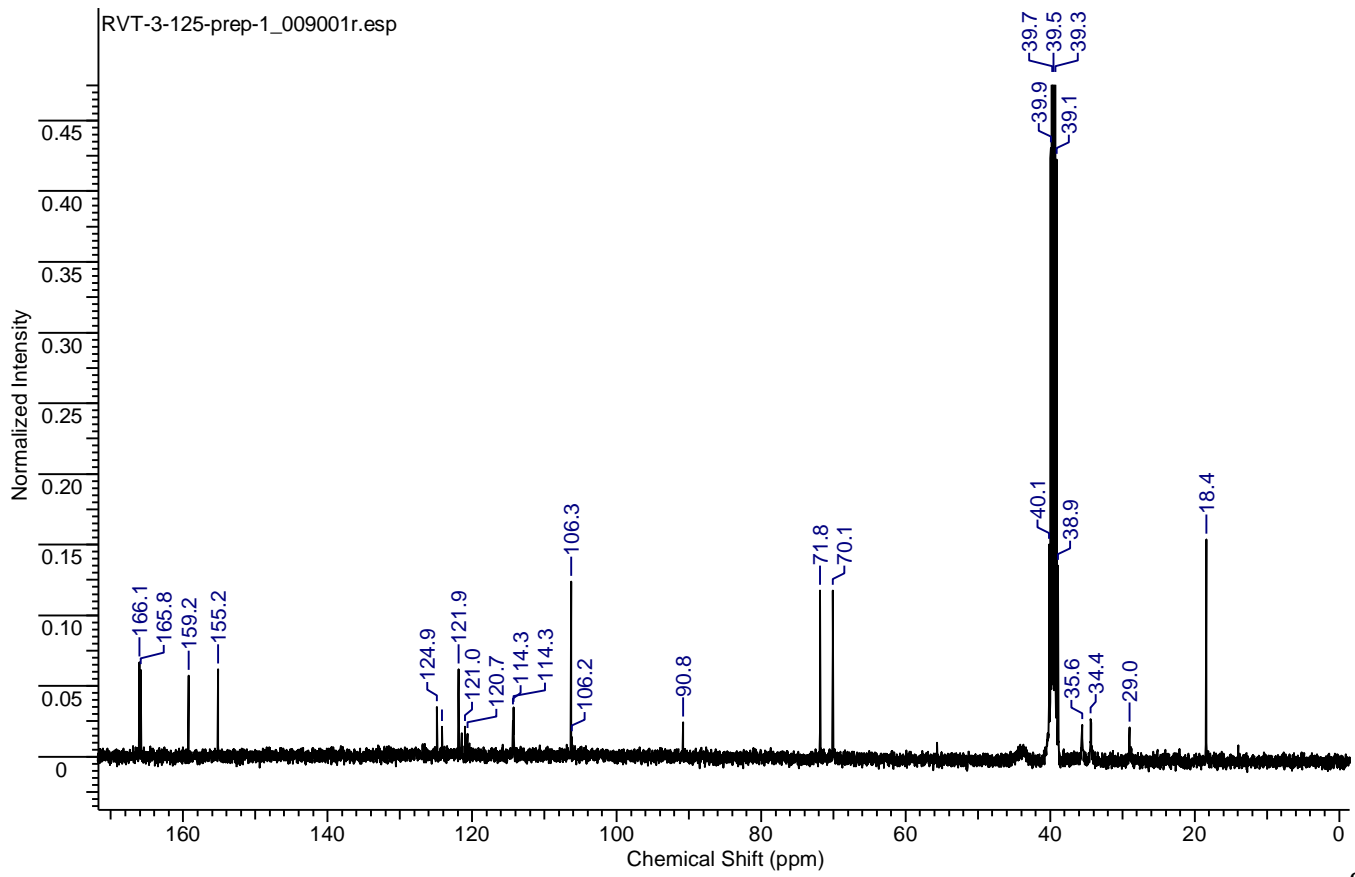

RVT-3-125-prep-2\_011001r.esp

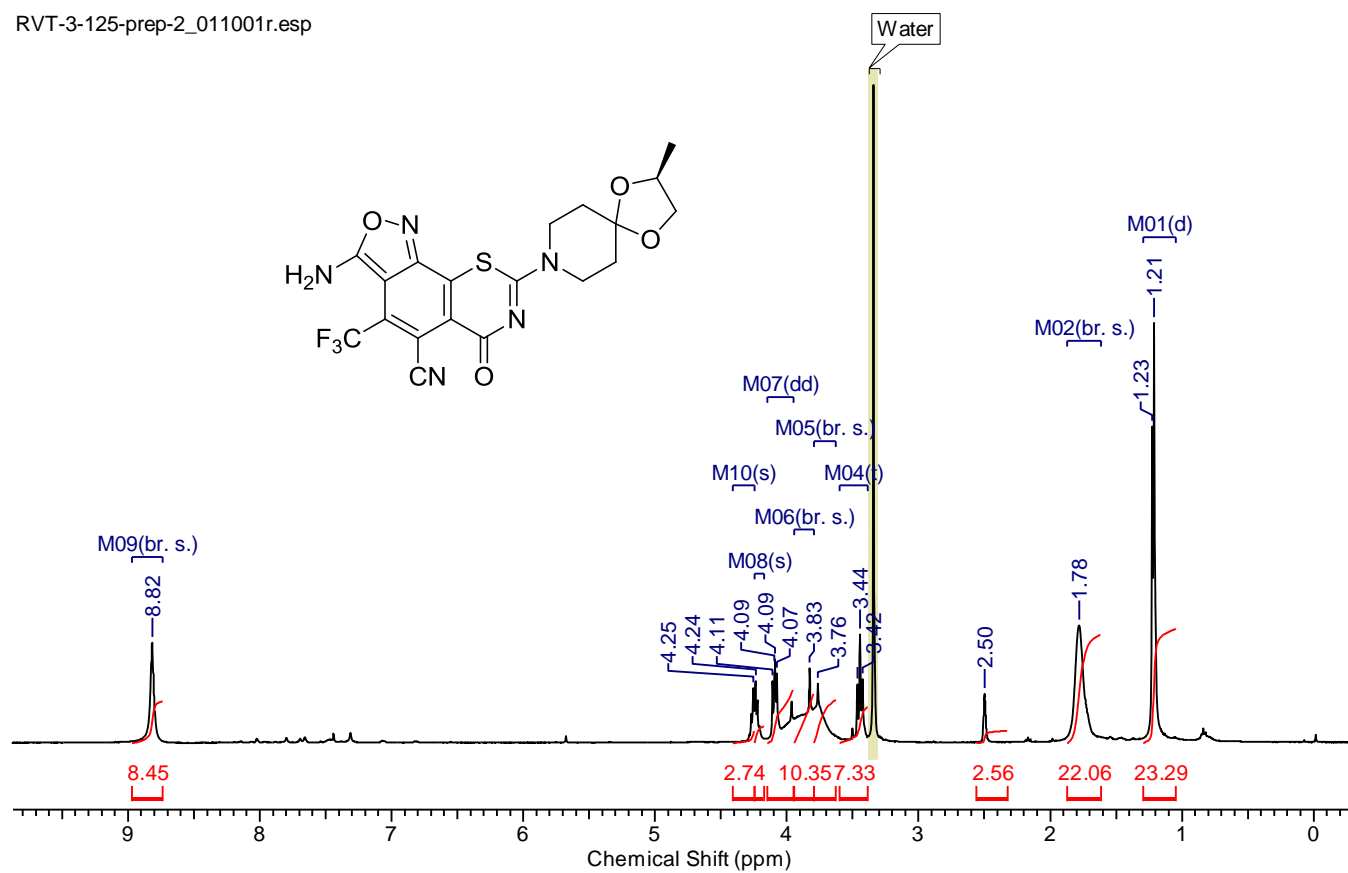

RVT-3-125-prep-2\_012001r

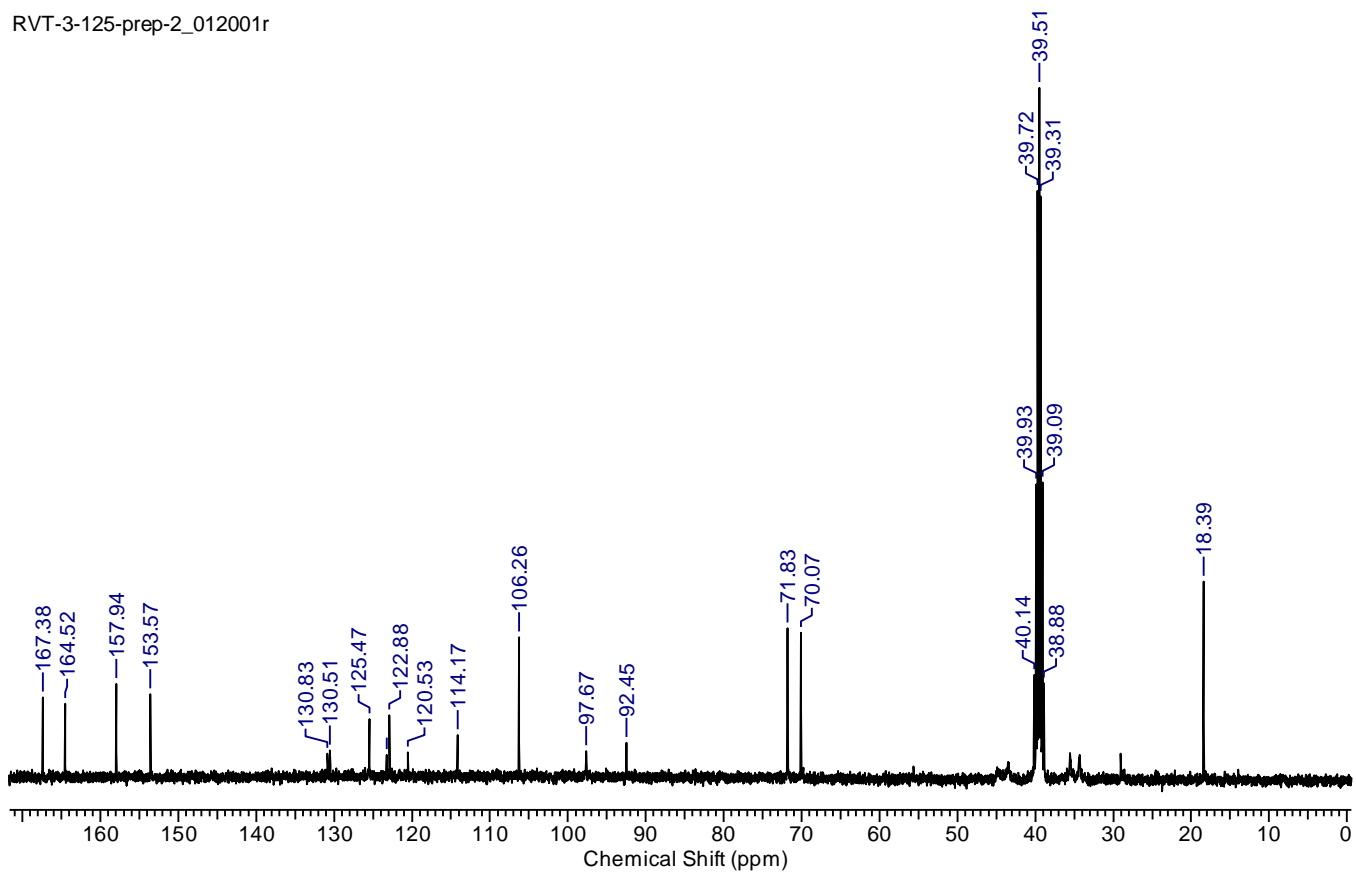

RVT-3-132\_1H\_600MHz.esp

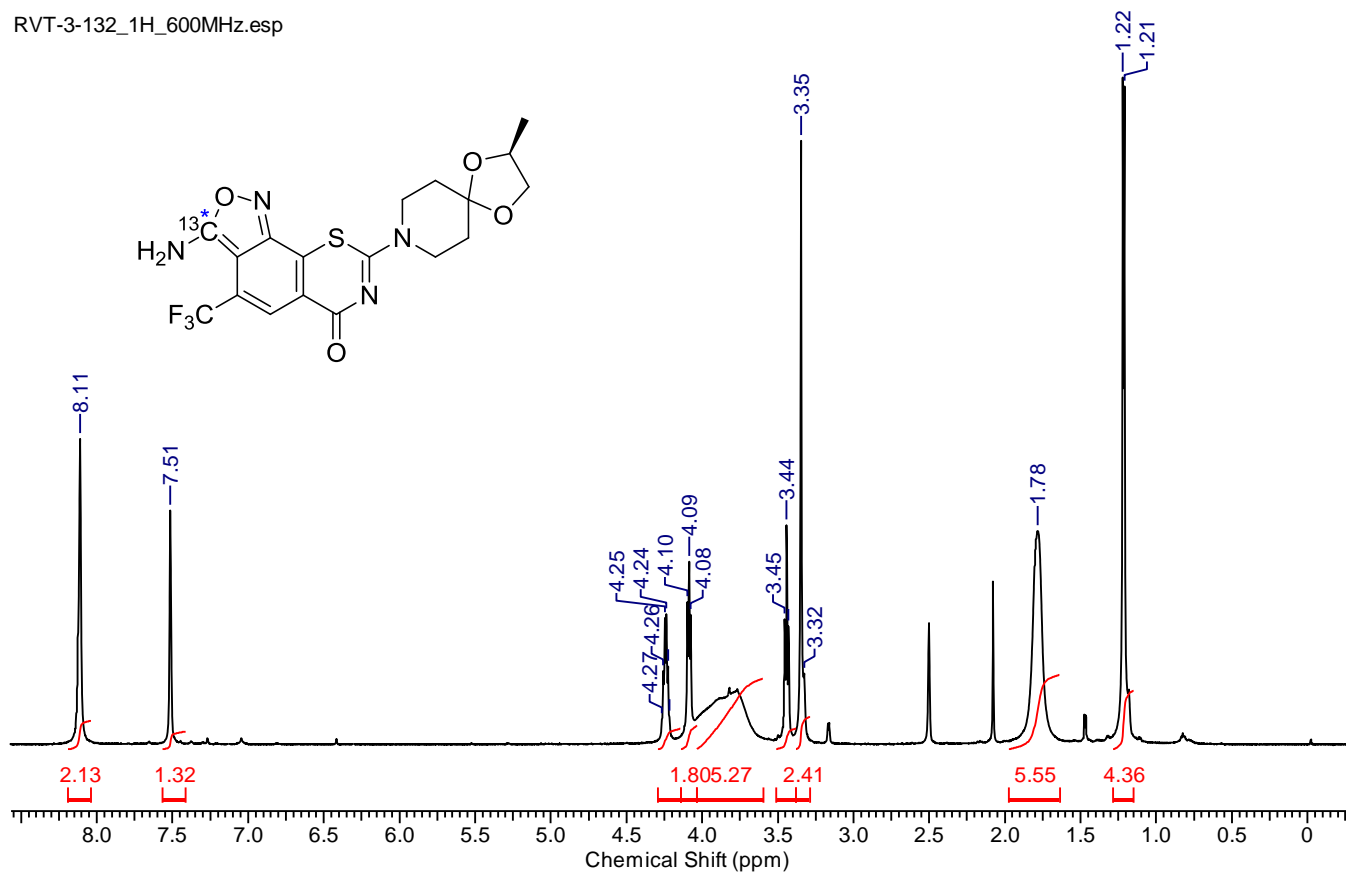

RVT-3-132\_13C\_600MHz.esp

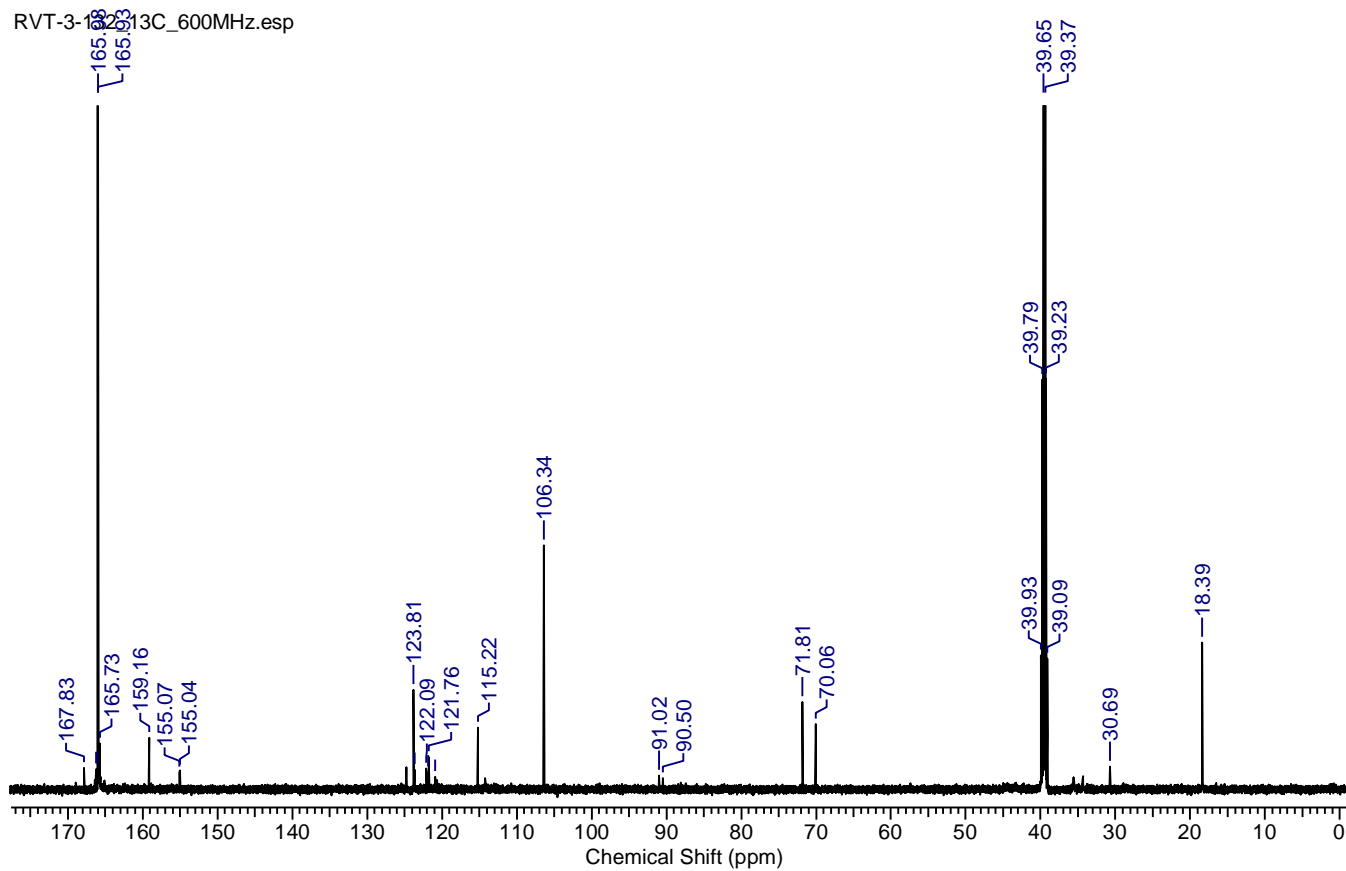



RVT-3-132-prep-2\_1H\_600MHz.esp

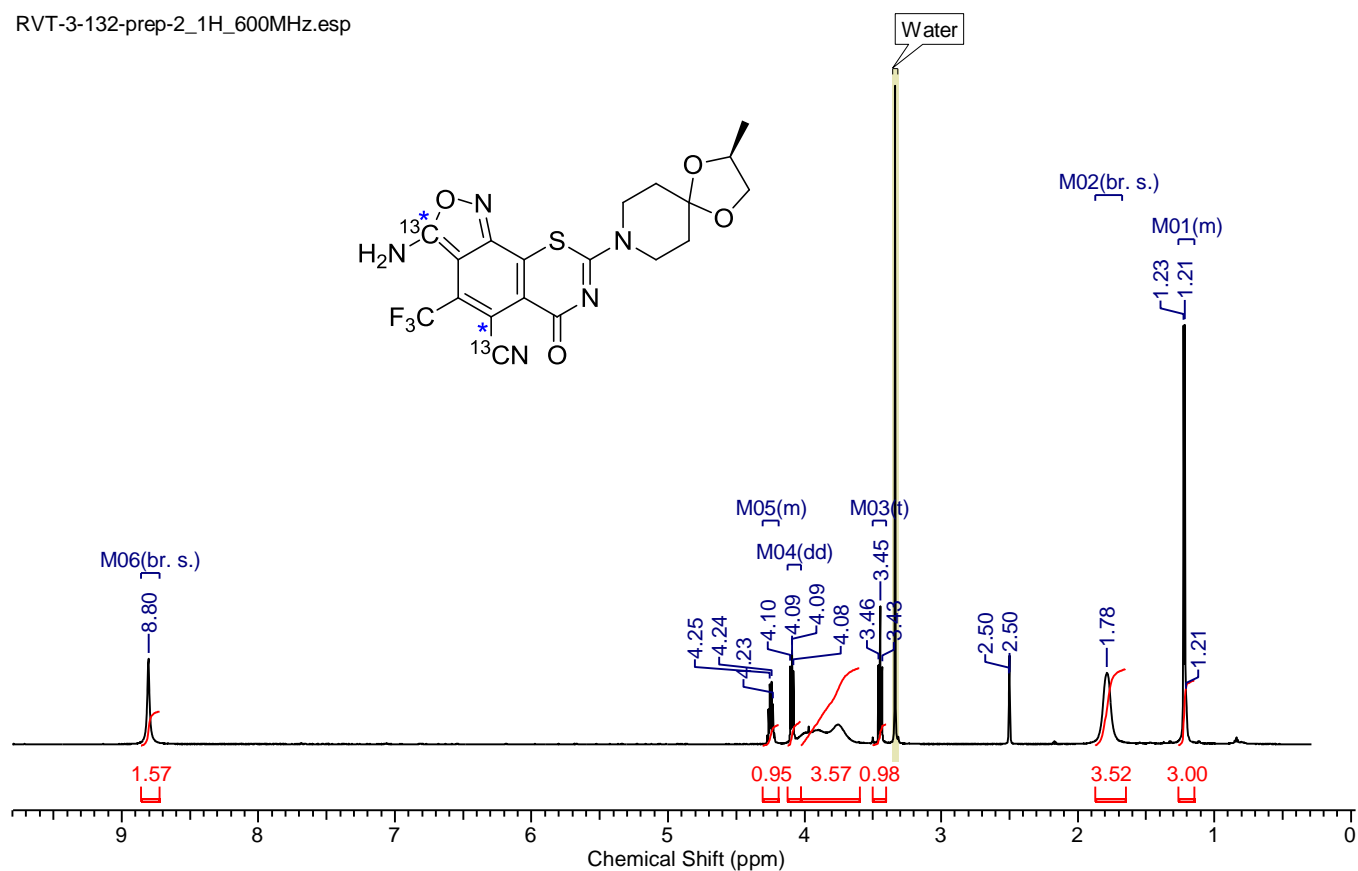

RVT-3-132-prep-2\_13C\_600MHz-1.000.sp

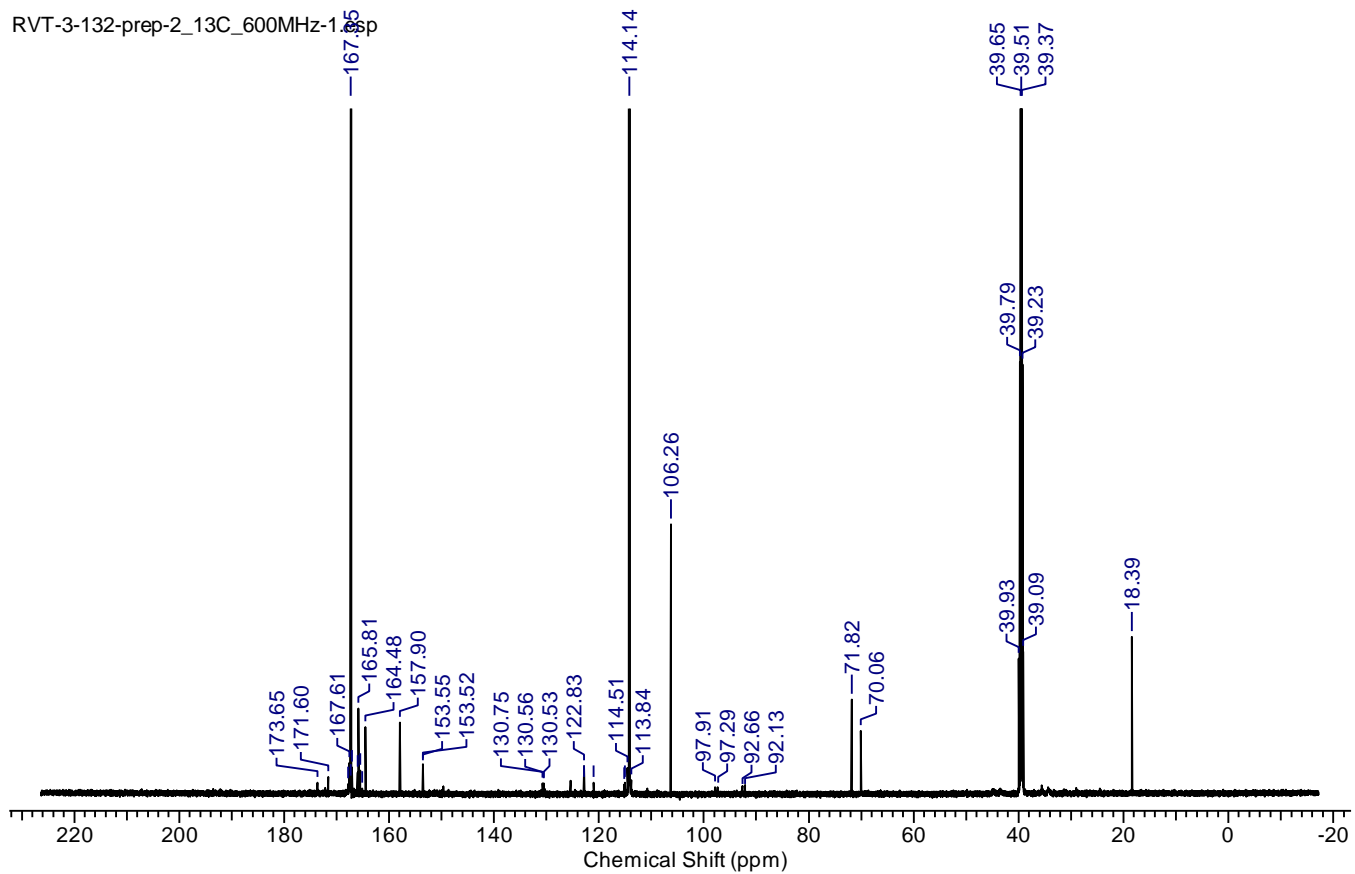

X-ray Structure Report  
for compound **32 (nd1236)**.

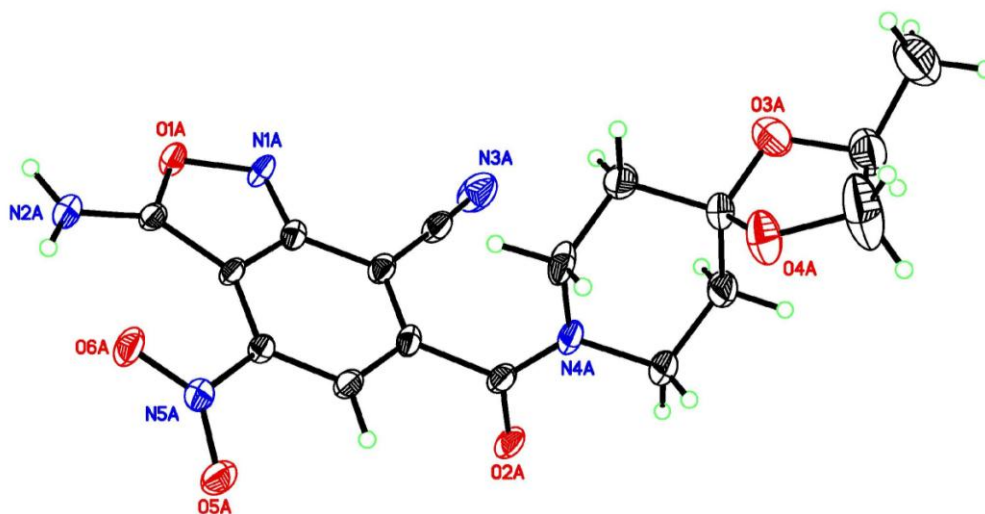

## DISCUSSION

The compound crystallizes as dark red plate-like crystals. There are four molecules of the compound in the primitive, acentric, monoclinic space group  $P2_1$ . There are two crystallographically independent molecules in the asymmetric unit. They are chemically identical and differ only in minor variations of derived parameters (predominantly torsion angles). The two molecules are the same enantiomer, and the structure depicted is the correct absolute configuration. This was determined by the known handedness at C15, and by comparison of Friedel pairs of reflections. The Flack  $x$  parameter was refined to 0.1(2) and the Bayesian statistical analysis of Friedel reflections yielded a Hooft  $y$  parameter of 0.09(10). Values of zero indicate the correct enantiomorph of the space group and hence the correct absolute configuration of the molecule. A value of one indicates the inverted absolute stereochemistry. These analyses are in agreement with the known chirality at C16. Though the structural information indicates a pseudo center of symmetry, this does not exist since the crystal is enantiopure.

Formally the compound is:

(*S*)-3-amino-6-(2-methyl-1,4-dioxo-8-azaspiro[4.5]decane-8-carbonyl)-4-nitrobenzo[*c*]isoxazole-7-carbonitrile (see Figures).

The fused 5, 6-bicyclic ring systems demonstrate a high level of conjugation with bond distances appropriate for aromatic contacts through out (see Table of Bond Distances). The tautomerism is depicted in the appended ChemDraw diagram. However, the formal single bonds depicted in this scheme exhibit aromatic character rather than single bond/double bond character. For example the C1-C6 contacts are 1.428(3) and 1.426(3) Å, respectively. An ideal aromatic C-C distance is 1.39 Å and a true single bond is closer to 1.54 Å.

Surprisingly the *exo*-cyclic primary amines (N2A/B) have shorter than expected N-C distances of 1.311(3) and 1.326(3) Å, respectively which are indicative of a multiple bond. However, the hydrogen atoms associated with these amines were reliably located from a difference Fourier map and were refined freely. In each case, one hydrogen forms a good intermolecular H-bond to the carbonyl oxygen, O2, of a neighboring molecule related by translation along the *b*-axis. The other forms a bifurcated H-bond to the nitro oxygen O6 of the other molecule of the pair related by the crystallographic screw axis and an intramolecular H-bond to O6 (see Table of Hydrogen Bonds for details). The packing motif is a linear, one-dimensional chain of H-bond molecules that are parallel to the crystallographic *b*-axis.

The high degree of conjugation within the structure leads to bond distances that vary from ideal bond parameters. These deviations are not exceptionally different, just notably different from ideal.

## CRYSTAL SUMMARY

Crystal data for  $C_{17}H_{17}N_5O_6$ ;  $M_r = 387.36$ ; Monoclinic; space group  $P2_1$ ;  $a = 10.7900(4)$  Å;  $b = 10.1646(4)$  Å;  $c = 16.7717(7)$  Å;  $\alpha = 90^\circ$ ;  $\beta = 105.078(2)^\circ$ ;  $\gamma = 90^\circ$ ;  $V = 1776.13(12)$  Å<sup>3</sup>;  $Z = 4$ ;  $T = 120(2)$  K;  $\lambda(\text{Cu-K}\alpha) = 1.54184$  Å;  $\mu(\text{Cu-K}\alpha) = 0.952$  mm<sup>-1</sup>;  $d_{\text{calc}} = 1.449$  g.cm<sup>-3</sup>; 34618

reflections collected; 6265 unique ( $R_{\text{int}} = 0.0279$ ); giving  $R_1 = 0.0354$ ,  $wR_2 = 0.0943$  for 5863 data with  $[I > 2\sigma(I)]$  and  $R_1 = 0.0378$ ,  $wR_2 = 0.0961$  for all 6265 data. Residual electron density ( $e^- \cdot \text{\AA}^{-3}$ ) max/min: 0.254/-0.204.

An arbitrary sphere of data were collected on a dark red plate-like crystal, having approximate dimensions of  $0.14 \times 0.10 \times 0.04$  mm, on a Bruker APEX-II diffractometer using a combination of  $\omega$ - and  $\phi$ -scans of  $0.5^\circ$ . Data were corrected for absorption and polarization effects and analyzed for space group determination. The structure was solved by direct methods and expanded routinely. The model was refined by full-matrix least-squares analysis of  $F^2$  against all reflections. All non-hydrogen atoms were refined with anisotropic thermal displacement parameters. Unless otherwise noted, hydrogen atoms were included in calculated positions. Thermal parameters for the hydrogens were tied to the isotropic thermal parameter of the atom to which they are bonded ( $1.5 \times$  for methyl,  $1.2 \times$  for all others).

## REFERENCES

Bruker AXS. (2008). *APEX-2*. Bruker-Nonius AXS, Madison, Wisconsin, USA.

G. M. Sheldrick, *Acta Cryst.*, **2008**, *A64*, 112.

R. W. W. Hooft, L. H. Straver & A. L. Spek, *J. Appl. Cryst.*, **2008**, *41*, 96.

H. D. Flack, *Acta Cryst.*, **1983**, *A39*, 876.

Table 1. Crystal data and structure refinement for nd1236.

|                                        |                                                                    |                            |
|----------------------------------------|--------------------------------------------------------------------|----------------------------|
| Identification code                    | nd1236                                                             |                            |
| Empirical formula                      | $C_{17}H_{17}N_5O_6$                                               |                            |
| Formula weight                         | 387.36                                                             |                            |
| Temperature                            | 120(2) K                                                           |                            |
| Wavelength                             | 1.54184 Å                                                          |                            |
| Crystal system                         | Monoclinic                                                         |                            |
| Space group                            | $P2_1$                                                             |                            |
| Unit cell dimensions                   | $a = 10.7900(4)$ Å                                                 | $\alpha = 90^\circ$        |
|                                        | $b = 10.1646(4)$ Å                                                 | $\beta = 105.078(2)^\circ$ |
|                                        | $c = 16.7717(7)$ Å                                                 | $\gamma = 90^\circ$        |
| Volume                                 | $1776.13(12)$ Å <sup>3</sup>                                       |                            |
| Z                                      | 4                                                                  |                            |
| Density (calculated)                   | $1.449$ g.cm <sup>-3</sup>                                         |                            |
| Absorption coefficient ( $\mu$ )       | $0.952$ mm <sup>-1</sup>                                           |                            |
| F(000)                                 | 808                                                                |                            |
| Crystal color, habit                   | dark red, plate                                                    |                            |
| Crystal size                           | $0.14 \times 0.10 \times 0.04$ mm <sup>3</sup>                     |                            |
| $\theta$ range for data collection     | $2.73$ to $71.33^\circ$                                            |                            |
| Index ranges                           | $-13 \leq h \leq 13$ , $-12 \leq k \leq 11$ , $-20 \leq l \leq 20$ |                            |
| Reflections collected                  | 34618                                                              |                            |
| Independent reflections                | 6265 [ $R_{int} = 0.0279$ ]                                        |                            |
| Completeness to $\theta = 71.33^\circ$ | 99.6 %                                                             |                            |
| Absorption correction                  | Numerical                                                          |                            |
| Max. and min. transmission             | 1.0000 and 0.8920                                                  |                            |
| Refinement method                      | Full-matrix least-squares on $F^2$                                 |                            |
| Data / restraints / parameters         | 6265 / 1 / 523                                                     |                            |
| Goodness-of-fit on $F^2$               | 1.038                                                              |                            |
| Final R indices [ $I > 2\sigma(I)$ ]   | $R_1 = 0.0354$ , $wR_2 = 0.0943$                                   |                            |
| R indices (all data)                   | $R_1 = 0.0378$ , $wR_2 = 0.0961$                                   |                            |
| Absolute structure parameter           | 0.1(2)                                                             |                            |
| Largest diff. peak and hole            | $0.254$ and $-0.204$ e <sup>-</sup> .Å <sup>-3</sup>               |                            |

Table 2. Atomic coordinates and equivalent isotropic displacement parameters ( $\text{\AA}^2$ ) for nd1236.  $U(\text{eq})$  is defined as one third of the trace of the orthogonalized  $U_{ij}$  tensor.

|        | x            | y           | z            | $U(\text{eq})$ |
|--------|--------------|-------------|--------------|----------------|
| O(1A)  | -0.04420(16) | 0.31699(17) | 0.15774(10)  | 0.023(1)       |
| O(2A)  | 0.00386(17)  | 0.96806(18) | 0.11833(10)  | 0.026(1)       |
| O(3A)  | 0.25351(17)  | 1.0037(2)   | 0.49191(11)  | 0.039(1)       |
| O(4A)  | 0.38900(16)  | 1.0358(3)   | 0.41171(12)  | 0.040(1)       |
| O(5A)  | 0.25220(17)  | 0.6030(2)   | -0.01749(11) | 0.030(1)       |
| O(6A)  | 0.24724(17)  | 0.40574(18) | 0.03054(11)  | 0.027(1)       |
| N(1A)  | -0.07749(18) | 0.4369(2)   | 0.19251(12)  | 0.023(1)       |
| N(2A)  | 0.0749(2)    | 0.2347(2)   | 0.07730(13)  | 0.025(1)       |
| N(3A)  | -0.1297(2)   | 0.7390(3)   | 0.28954(16)  | 0.042(1)       |
| N(4A)  | 0.1556(2)    | 0.9294(2)   | 0.23809(12)  | 0.025(1)       |
| N(5A)  | 0.21586(19)  | 0.5225(2)   | 0.02556(12)  | 0.022(1)       |
| C(1A)  | -0.0113(2)   | 0.5263(3)   | 0.16452(14)  | 0.019(1)       |
| C(2A)  | -0.0074(2)   | 0.6637(3)   | 0.18458(14)  | 0.021(1)       |
| C(3A)  | 0.0647(2)    | 0.7468(2)   | 0.14896(14)  | 0.019(1)       |
| C(4A)  | 0.1323(2)    | 0.6975(3)   | 0.09352(14)  | 0.021(1)       |
| C(5A)  | 0.1322(2)    | 0.5663(2)   | 0.07738(13)  | 0.018(1)       |
| C(6A)  | 0.0635(2)    | 0.4762(2)   | 0.11244(14)  | 0.018(1)       |
| C(7A)  | 0.0383(2)    | 0.3387(2)   | 0.11148(14)  | 0.020(1)       |
| C(8A)  | -0.0758(2)   | 0.7083(3)   | 0.24212(15)  | 0.026(1)       |
| C(9A)  | 0.0724(2)    | 0.8920(3)   | 0.16803(14)  | 0.022(1)       |
| C(10A) | 0.2520(2)    | 0.8425(3)   | 0.29165(16)  | 0.030(1)       |
| C(11A) | 0.2447(3)    | 0.8522(3)   | 0.38049(15)  | 0.034(1)       |
| C(12A) | 0.2623(2)    | 0.9945(3)   | 0.40943(15)  | 0.026(1)       |
| C(13A) | 0.1634(3)    | 1.0825(3)   | 0.35264(15)  | 0.031(1)       |
| C(14A) | 0.1679(3)    | 1.0677(3)   | 0.26297(16)  | 0.033(1)       |
| C(15A) | 0.3326(2)    | 1.1147(3)   | 0.52779(15)  | 0.043(1)       |
| C(16A) | 0.4297(3)    | 1.1253(5)   | 0.4786(2)    | 0.072(1)       |
| C(17A) | 0.3858(4)    | 1.0914(4)   | 0.6181(2)    | 0.067(1)       |
| O(1B)  | 0.45637(16)  | 0.74916(17) | 0.15512(10)  | 0.024(1)       |
| O(2B)  | 0.50146(16)  | 0.09677(18) | 0.11572(10)  | 0.025(1)       |
| O(3B)  | 0.74971(16)  | 0.0804(2)   | 0.48907(10)  | 0.035(1)       |
| O(4B)  | 0.88944(16)  | 0.0393(2)   | 0.41063(11)  | 0.036(1)       |
| O(5B)  | 0.75858(18)  | 0.4662(2)   | -0.01724(11) | 0.031(1)       |
| O(6B)  | 0.75217(17)  | 0.66203(17) | 0.03141(11)  | 0.026(1)       |
| N(1B)  | 0.42213(19)  | 0.6285(2)   | 0.18855(12)  | 0.025(1)       |
| N(2B)  | 0.5795(2)    | 0.8329(2)   | 0.07737(13)  | 0.022(1)       |
| N(3B)  | 0.3579(3)    | 0.3235(3)   | 0.27749(16)  | 0.043(1)       |
| N(4B)  | 0.65687(19)  | 0.1394(2)   | 0.23426(12)  | 0.023(1)       |
| N(5B)  | 0.72027(19)  | 0.5451(2)   | 0.02583(12)  | 0.021(1)       |
| C(1B)  | 0.4895(2)    | 0.5399(3)   | 0.16039(14)  | 0.021(1)       |
| C(2B)  | 0.4906(2)    | 0.4019(3)   | 0.17843(13)  | 0.020(1)       |

|        |           |            |             |           |
|--------|-----------|------------|-------------|-----------|
| C(3B)  | 0.5645(2) | 0.3195(2)  | 0.14471(14) | 0.020(1)  |
| C(4B)  | 0.6354(2) | 0.3683(3)  | 0.09141(14) | 0.020(1)  |
| C(5B)  | 0.6372(2) | 0.5005(2)  | 0.07572(13) | 0.019(1)  |
| C(6B)  | 0.5655(2) | 0.5927(3)  | 0.11003(14) | 0.019(1)  |
| C(7B)  | 0.5402(2) | 0.7272(3)  | 0.11003(14) | 0.021(1)  |
| C(8B)  | 0.4172(2) | 0.3557(3)  | 0.23324(16) | 0.028(1)  |
| C(9B)  | 0.5726(2) | 0.1734(2)  | 0.16405(13) | 0.019(1)  |
| C(10B) | 0.7562(2) | 0.2265(3)  | 0.28417(15) | 0.030(1)  |
| C(11B) | 0.7493(3) | 0.2230(3)  | 0.37344(15) | 0.032(1)  |
| C(12B) | 0.7623(2) | 0.0850(3)  | 0.40703(15) | 0.030(1)  |
| C(13B) | 0.6631(2) | -0.0052(3) | 0.35262(15) | 0.029(1)  |
| C(14B) | 0.6669(3) | 0.0016(3)  | 0.26261(15) | 0.027(1)  |
| C(15B) | 0.8718(2) | 0.0453(2)  | 0.54353(13) | 0.034(1)  |
| C(16B) | 0.9316(3) | -0.0317(4) | 0.48631(17) | 0.041(1)  |
| C(17B) | 0.8486(3) | -0.0272(4) | 0.61576(17) | 0.050(1)  |
| H(2AA) | 0.046(3)  | 0.157(3)   | 0.0885(16)  | 0.023(7)  |
| H(2AB) | 0.139(3)  | 0.242(3)   | 0.0496(18)  | 0.036(8)  |
| H(4A)  | 0.1779    | 0.7562     | 0.0674      | 0.025     |
| H(10A) | 0.3389    | 0.8681     | 0.2881      | 0.036     |
| H(10B) | 0.2366    | 0.7504     | 0.2724      | 0.036     |
| H(11A) | 0.3124    | 0.7968     | 0.4161      | 0.040     |
| H(11B) | 0.1604    | 0.8194     | 0.3850      | 0.040     |
| H(13A) | 0.1802    | 1.1754     | 0.3699      | 0.037     |
| H(13B) | 0.0766    | 1.0592     | 0.3575      | 0.037     |
| H(14A) | 0.0972    | 1.1190     | 0.2269      | 0.040     |
| H(14B) | 0.2501    | 1.1030     | 0.2564      | 0.040     |
| H(15A) | 0.2787    | 1.1961     | 0.5195      | 0.052     |
| H(16A) | 0.4328    | 1.2161     | 0.4580      | 0.086     |
| H(16B) | 0.5161    | 1.1013     | 0.5129      | 0.086     |
| H(17D) | 0.4396    | 1.0123     | 0.6266      | 0.101     |
| H(17E) | 0.3152    | 1.0793     | 0.6442      | 0.101     |
| H(17F) | 0.4377    | 1.1673     | 0.6430      | 0.101     |
| H(2BA) | 0.556(3)  | 0.907(4)   | 0.095(2)    | 0.046(10) |
| H(2BB) | 0.627(3)  | 0.827(3)   | 0.0492(17)  | 0.022(7)  |
| H(4B)  | 0.6821    | 0.3093     | 0.0662      | 0.024     |
| H(10C) | 0.7426    | 0.3175     | 0.2628      | 0.036     |
| H(10D) | 0.8421    | 0.1970     | 0.2806      | 0.036     |
| H(11C) | 0.8186    | 0.2783     | 0.4074      | 0.038     |
| H(11D) | 0.6661    | 0.2602     | 0.3771      | 0.038     |
| H(13C) | 0.5765    | 0.0202     | 0.3569      | 0.035     |
| H(13D) | 0.6793    | -0.0968    | 0.3726      | 0.035     |
| H(14C) | 0.7482    | -0.0369    | 0.2566      | 0.032     |
| H(14D) | 0.5950    | -0.0501    | 0.2281      | 0.032     |
| H(15B) | 0.9232    | 0.1265     | 0.5628      | 0.040     |
| H(16C) | 1.0264    | -0.0320    | 0.5062      | 0.049     |
| H(16D) | 0.9002    | -0.1236    | 0.4802      | 0.049     |

|        |        |         |        |       |
|--------|--------|---------|--------|-------|
| H(17A) | 0.7885 | -0.0997 | 0.5961 | 0.075 |
| H(17B) | 0.8122 | 0.0330  | 0.6493 | 0.075 |
| H(17C) | 0.9300 | -0.0627 | 0.6493 | 0.075 |



Table 3. Anisotropic displacement parameters ( $\text{\AA}^2$ ) for nd1236.

The anisotropic displacement factor exponent takes the form:

$$-2\pi^2[h^2a^*{}^2U_{11} + \dots + 2hka^*b^*U_{12}]$$

|        | $U_{11}$   | $U_{22}$   | $U_{33}$   | $U_{23}$    | $U_{13}$    | $U_{12}$    |
|--------|------------|------------|------------|-------------|-------------|-------------|
| O(1A)  | 0.0260(8)  | 0.0140(9)  | 0.0295(9)  | -0.0021(7)  | 0.0097(6)   | -0.0025(7)  |
| O(2A)  | 0.0330(9)  | 0.0123(9)  | 0.0306(9)  | 0.0036(7)   | 0.0046(7)   | 0.0033(8)   |
| O(3A)  | 0.0446(11) | 0.0447(13) | 0.0272(9)  | -0.0016(8)  | 0.0064(8)   | -0.0056(9)  |
| O(4A)  | 0.0304(9)  | 0.0473(13) | 0.0417(10) | -0.0184(10) | 0.0068(8)   | -0.0102(10) |
| O(5A)  | 0.0449(11) | 0.0183(10) | 0.0353(9)  | 0.0018(8)   | 0.0234(8)   | -0.0030(9)  |
| O(6A)  | 0.0341(9)  | 0.0134(10) | 0.0354(9)  | -0.0016(8)  | 0.0142(7)   | 0.0039(8)   |
| N(1A)  | 0.0267(10) | 0.0103(11) | 0.0324(10) | 0.0007(8)   | 0.0098(8)   | -0.0002(8)  |
| N(2A)  | 0.0344(11) | 0.0144(12) | 0.0287(10) | -0.0009(9)  | 0.0097(9)   | -0.0012(9)  |
| N(3A)  | 0.0528(13) | 0.0273(14) | 0.0558(13) | 0.0032(11)  | 0.0324(11)  | 0.0062(11)  |
| N(4A)  | 0.0325(10) | 0.0122(11) | 0.0275(10) | -0.0027(8)  | 0.0045(8)   | -0.0021(8)  |
| N(5A)  | 0.0263(9)  | 0.0178(12) | 0.0218(9)  | -0.0016(8)  | 0.0077(7)   | -0.0033(9)  |
| C(1A)  | 0.0198(10) | 0.0150(12) | 0.0210(10) | -0.0016(9)  | 0.0045(8)   | 0.0006(9)   |
| C(2A)  | 0.0226(10) | 0.0146(13) | 0.0236(10) | 0.0010(9)   | 0.0029(8)   | 0.0025(9)   |
| C(3A)  | 0.0202(10) | 0.0134(12) | 0.0218(10) | -0.0027(9)  | 0.0023(8)   | 0.0007(9)   |
| C(4A)  | 0.0236(11) | 0.0147(12) | 0.0221(10) | 0.0024(9)   | 0.0037(8)   | -0.0017(9)  |
| C(5A)  | 0.0205(10) | 0.0139(13) | 0.0185(10) | -0.0003(9)  | 0.0042(8)   | 0.0002(9)   |
| C(6A)  | 0.0226(10) | 0.0103(12) | 0.0199(10) | 0.0016(9)   | 0.0020(8)   | -0.0008(9)  |
| C(7A)  | 0.0230(10) | 0.0139(12) | 0.0188(10) | 0.0013(9)   | 0.0006(8)   | -0.0019(9)  |
| C(8A)  | 0.0317(11) | 0.0149(13) | 0.0335(11) | 0.0028(9)   | 0.0111(9)   | 0.0024(10)  |
| C(9A)  | 0.0272(11) | 0.0140(13) | 0.0258(11) | 0.0016(10)  | 0.0102(9)   | 0.0001(10)  |
| C(10A) | 0.0307(12) | 0.0139(12) | 0.0386(13) | -0.0061(11) | -0.0030(10) | 0.0035(10)  |
| C(11A) | 0.0412(13) | 0.0227(14) | 0.0283(12) | 0.0023(10)  | -0.0064(10) | -0.0003(11) |
| C(12A) | 0.0299(11) | 0.0225(13) | 0.0249(11) | -0.0058(10) | 0.0039(9)   | -0.0051(10) |
| C(13A) | 0.0417(13) | 0.0193(15) | 0.0285(12) | -0.0033(10) | 0.0027(10)  | 0.0047(11)  |
| C(14A) | 0.0513(15) | 0.0163(15) | 0.0280(13) | -0.0012(10) | 0.0035(11)  | -0.0025(12) |
| C(15A) | 0.0507(13) | 0.0364(15) | 0.0370(12) | -0.0092(11) | 0.0015(10)  | 0.0051(11)  |
| C(16A) | 0.0547(19) | 0.096(3)   | 0.069(2)   | -0.049(2)   | 0.0225(17)  | -0.034(2)   |
| C(17A) | 0.087(3)   | 0.059(2)   | 0.0405(16) | -0.0071(16) | -0.0105(16) | 0.009(2)    |
| O(1B)  | 0.0312(9)  | 0.0115(9)  | 0.0302(9)  | -0.0016(7)  | 0.0110(7)   | 0.0027(7)   |
| O(2B)  | 0.0314(8)  | 0.0147(9)  | 0.0274(8)  | -0.0006(7)  | 0.0023(6)   | -0.0001(8)  |
| O(3B)  | 0.0378(10) | 0.0405(12) | 0.0241(8)  | 0.0047(8)   | 0.0054(7)   | 0.0023(8)   |
| O(4B)  | 0.0303(9)  | 0.0438(12) | 0.0351(9)  | 0.0124(9)   | 0.0083(7)   | 0.0088(9)   |
| O(5B)  | 0.0417(10) | 0.0187(10) | 0.0362(9)  | -0.0017(8)  | 0.0187(8)   | 0.0039(8)   |
| O(6B)  | 0.0330(9)  | 0.0128(10) | 0.0328(9)  | 0.0029(8)   | 0.0117(7)   | 0.0000(7)   |
| N(1B)  | 0.0292(10) | 0.0166(12) | 0.0310(10) | 0.0034(8)   | 0.0102(8)   | 0.0010(9)   |
| N(2B)  | 0.0325(11) | 0.0084(11) | 0.0253(10) | 0.0000(8)   | 0.0090(9)   | 0.0039(9)   |
| N(3B)  | 0.0574(14) | 0.0263(14) | 0.0560(14) | -0.0030(11) | 0.0365(12)  | -0.0120(11) |
| N(4B)  | 0.0288(9)  | 0.0126(11) | 0.0247(9)  | 0.0013(8)   | 0.0046(7)   | -0.0018(8)  |
| N(5B)  | 0.0252(9)  | 0.0118(10) | 0.0253(9)  | 0.0009(8)   | 0.0051(7)   | 0.0010(9)   |
| C(1B)  | 0.0222(11) | 0.0153(12) | 0.0221(10) | -0.0022(9)  | 0.0020(8)   | 0.0018(10)  |

|        |            |            |            |             |            |             |
|--------|------------|------------|------------|-------------|------------|-------------|
| C(2B)  | 0.0221(10) | 0.0147(12) | 0.0224(10) | 0.0009(9)   | 0.0057(8)  | -0.0009(9)  |
| C(3B)  | 0.0228(11) | 0.0132(13) | 0.0213(10) | -0.0029(10) | -0.0005(8) | -0.0006(9)  |
| C(4B)  | 0.0207(10) | 0.0145(13) | 0.0226(10) | -0.0017(9)  | 0.0032(8)  | 0.0011(9)   |
| C(5B)  | 0.0216(10) | 0.0137(13) | 0.0204(11) | -0.0009(9)  | 0.0028(8)  | 0.0011(9)   |
| C(6B)  | 0.0206(10) | 0.0159(12) | 0.0199(10) | 0.0031(9)   | 0.0030(8)  | -0.0029(10) |
| C(7B)  | 0.0230(11) | 0.0154(12) | 0.0238(11) | -0.0021(10) | 0.0045(8)  | 0.0026(10)  |
| C(8B)  | 0.0335(12) | 0.0128(13) | 0.0398(13) | -0.0019(10) | 0.0125(10) | -0.0012(10) |
| C(9B)  | 0.0209(10) | 0.0124(13) | 0.0248(11) | 0.0016(9)   | 0.0081(8)  | 0.0000(9)   |
| C(10B) | 0.0292(11) | 0.0271(15) | 0.0293(12) | 0.0048(11)  | -0.0003(9) | -0.0079(11) |
| C(11B) | 0.0354(12) | 0.0251(14) | 0.0304(12) | -0.0009(11) | 0.0004(10) | -0.0042(11) |
| C(12B) | 0.0300(12) | 0.0331(15) | 0.0262(11) | 0.0004(11)  | 0.0068(9)  | 0.0008(11)  |
| C(13B) | 0.0337(12) | 0.0244(15) | 0.0285(12) | 0.0094(10)  | 0.0082(10) | 0.0002(11)  |
| C(14B) | 0.0408(13) | 0.0113(13) | 0.0279(12) | 0.0043(9)   | 0.0081(10) | 0.0036(10)  |
| C(15B) | 0.0379(11) | 0.0263(12) | 0.0295(10) | 0.0032(9)   | -0.0040(8) | -0.0028(9)  |
| C(16B) | 0.0360(13) | 0.0440(16) | 0.0385(13) | 0.0191(12)  | 0.0009(10) | 0.0109(12)  |
| C(17B) | 0.0706(19) | 0.0430(18) | 0.0320(13) | 0.0061(13)  | 0.0064(12) | 0.0004(15)  |

Table 4. Bond lengths [ $\text{\AA}$ ] for nd1236.

| atom-atom     | distance | atom-atom     | distance |
|---------------|----------|---------------|----------|
| O(1A)-C(7A)   | 1.343(3) | O(1A)-N(1A)   | 1.437(3) |
| O(2A)-C(9A)   | 1.232(3) | O(3A)-C(12A)  | 1.414(3) |
| O(3A)-C(15A)  | 1.448(3) | O(4A)-C(12A)  | 1.421(3) |
| O(4A)-C(16A)  | 1.422(4) | O(5A)-N(5A)   | 1.221(3) |
| O(6A)-N(5A)   | 1.231(3) | N(1A)-C(1A)   | 1.315(3) |
| N(2A)-C(7A)   | 1.311(3) | N(3A)-C(8A)   | 1.144(3) |
| N(4A)-C(9A)   | 1.335(3) | N(4A)-C(14A)  | 1.463(3) |
| N(4A)-C(10A)  | 1.477(3) | N(5A)-C(5A)   | 1.475(3) |
| C(1A)-C(6A)   | 1.428(3) | C(1A)-C(2A)   | 1.435(3) |
| C(2A)-C(3A)   | 1.384(3) | C(2A)-C(8A)   | 1.432(3) |
| C(3A)-C(4A)   | 1.414(3) | C(3A)-C(9A)   | 1.508(4) |
| C(4A)-C(5A)   | 1.360(3) | C(4A)-H(4A)   | 0.9500   |
| C(5A)-C(6A)   | 1.401(3) | C(6A)-C(7A)   | 1.423(3) |
| C(10A)-C(11A) | 1.516(4) | C(11A)-C(12A) | 1.522(4) |
| C(12A)-C(13A) | 1.523(4) | C(13A)-C(14A) | 1.525(3) |
| C(15A)-C(17A) | 1.493(4) | C(15A)-C(16A) | 1.497(4) |
| O(1B)-C(7B)   | 1.340(3) | O(1B)-N(1B)   | 1.437(3) |
| O(2B)-C(9B)   | 1.236(3) | O(3B)-C(12B)  | 1.418(3) |
| O(3B)-C(15B)  | 1.439(3) | O(4B)-C(16B)  | 1.428(3) |
| O(4B)-C(12B)  | 1.435(3) | O(5B)-N(5B)   | 1.221(3) |
| O(6B)-N(5B)   | 1.234(3) | N(1B)-C(1B)   | 1.319(3) |
| N(2B)-C(7B)   | 1.326(3) | N(3B)-C(8B)   | 1.146(3) |
| N(4B)-C(9B)   | 1.333(3) | N(4B)-C(10B)  | 1.472(3) |
| N(4B)-C(14B)  | 1.474(3) | N(5B)-C(5B)   | 1.449(3) |
| C(1B)-C(6B)   | 1.426(3) | C(1B)-C(2B)   | 1.434(4) |
| C(2B)-C(3B)   | 1.376(3) | C(2B)-C(8B)   | 1.439(3) |
| C(3B)-C(4B)   | 1.409(3) | C(3B)-C(9B)   | 1.518(3) |
| C(4B)-C(5B)   | 1.370(3) | C(4B)-H(4B)   | 0.9500   |
| C(5B)-C(6B)   | 1.429(3) | C(6B)-C(7B)   | 1.394(4) |
| C(10B)-C(11B) | 1.519(3) | C(11B)-C(12B) | 1.504(4) |
| C(12B)-C(13B) | 1.520(4) | C(13B)-C(14B) | 1.522(3) |
| C(15B)-C(17B) | 1.494(4) | C(15B)-C(16B) | 1.508(4) |
| N(2A)-H(2AA)  | 0.89(3)  | N(2A)-H(2AB)  | 0.93(3)  |
| C(10A)-H(10A) | 0.9900   | C(10A)-H(10B) | 0.9900   |
| C(11A)-H(11A) | 0.9900   | C(11A)-H(11B) | 0.9900   |
| C(13A)-H(13A) | 0.9900   | C(13A)-H(13B) | 0.9900   |
| C(14A)-H(14A) | 0.9900   | C(14A)-H(14B) | 0.9900   |
| C(15A)-H(15A) | 1.0000   | C(16A)-H(16A) | 0.9900   |
| C(16A)-H(16B) | 0.9900   | C(17A)-H(17D) | 0.9800   |
| C(17A)-H(17E) | 0.9800   | C(17A)-H(17F) | 0.9800   |
| N(2B)-H(2BA)  | 0.88(4)  | N(2B)-H(2BB)  | 0.78(3)  |
| C(10B)-H(10C) | 0.9900   | C(10B)-H(10D) | 0.9900   |

|               |        |               |        |
|---------------|--------|---------------|--------|
| C(11B)-H(11C) | 0.9900 | C(11B)-H(11D) | 0.9900 |
| C(13B)-H(13C) | 0.9900 | C(13B)-H(13D) | 0.9900 |
| C(14B)-H(14C) | 0.9900 | C(14B)-H(14D) | 0.9900 |
| C(15B)-H(15B) | 1.0000 | C(16B)-H(16C) | 0.9900 |
| C(16B)-H(16D) | 0.9900 | C(17B)-H(17A) | 0.9800 |
| C(17B)-H(17B) | 0.9800 | C(17B)-H(17C) | 0.9800 |

Symmetry transformations used to generate equivalent atoms:

Table 5. Bond angles [°] for nd1236.

| atom-atom-atom       | angle      | atom-atom-atom       | angle      |
|----------------------|------------|----------------------|------------|
| C(7A)-O(1A)-N(1A)    | 111.64(18) | C(12A)-O(3A)-C(15A)  | 106.0(2)   |
| C(12A)-O(4A)-C(16A)  | 107.9(2)   | C(1A)-N(1A)-O(1A)    | 102.97(17) |
| C(9A)-N(4A)-C(14A)   | 121.0(2)   | C(9A)-N(4A)-C(10A)   | 124.8(2)   |
| C(14A)-N(4A)-C(10A)  | 113.8(2)   | O(5A)-N(5A)-O(6A)    | 124.1(2)   |
| O(5A)-N(5A)-C(5A)    | 119.1(2)   | O(6A)-N(5A)-C(5A)    | 116.8(2)   |
| N(1A)-C(1A)-C(6A)    | 114.7(2)   | N(1A)-C(1A)-C(2A)    | 125.0(2)   |
| C(6A)-C(1A)-C(2A)    | 120.3(2)   | C(3A)-C(2A)-C(8A)    | 122.9(2)   |
| C(3A)-C(2A)-C(1A)    | 118.6(2)   | C(8A)-C(2A)-C(1A)    | 118.5(2)   |
| C(2A)-C(3A)-C(4A)    | 120.7(2)   | C(2A)-C(3A)-C(9A)    | 120.8(2)   |
| C(4A)-C(3A)-C(9A)    | 118.5(2)   | C(5A)-C(4A)-C(3A)    | 120.3(2)   |
| C(4A)-C(5A)-C(6A)    | 122.0(2)   | C(4A)-C(5A)-N(5A)    | 116.4(2)   |
| C(6A)-C(5A)-N(5A)    | 121.5(2)   | C(5A)-C(6A)-C(7A)    | 139.3(2)   |
| C(5A)-C(6A)-C(1A)    | 117.9(2)   | C(7A)-C(6A)-C(1A)    | 102.8(2)   |
| N(2A)-C(7A)-O(1A)    | 116.1(2)   | N(2A)-C(7A)-C(6A)    | 135.9(2)   |
| O(1A)-C(7A)-C(6A)    | 107.9(2)   | N(3A)-C(8A)-C(2A)    | 177.2(3)   |
| O(2A)-C(9A)-N(4A)    | 124.4(3)   | O(2A)-C(9A)-C(3A)    | 118.7(2)   |
| N(4A)-C(9A)-C(3A)    | 116.9(2)   | N(4A)-C(10A)-C(11A)  | 110.5(2)   |
| C(10A)-C(11A)-C(12A) | 109.9(2)   | O(3A)-C(12A)-O(4A)   | 105.26(18) |
| O(3A)-C(12A)-C(11A)  | 109.9(2)   | O(4A)-C(12A)-C(11A)  | 109.2(2)   |
| O(3A)-C(12A)-C(13A)  | 111.0(2)   | O(4A)-C(12A)-C(13A)  | 110.9(2)   |
| C(11A)-C(12A)-C(13A) | 110.5(2)   | C(12A)-C(13A)-C(14A) | 111.2(2)   |
| N(4A)-C(14A)-C(13A)  | 110.7(2)   | O(3A)-C(15A)-C(17A)  | 109.1(3)   |
| O(3A)-C(15A)-C(16A)  | 104.4(2)   | C(17A)-C(15A)-C(16A) | 115.5(3)   |
| O(4A)-C(16A)-C(15A)  | 105.8(3)   | C(7B)-O(1B)-N(1B)    | 110.95(18) |
| C(12B)-O(3B)-C(15B)  | 108.73(17) | C(16B)-O(4B)-C(12B)  | 106.34(19) |
| C(1B)-N(1B)-O(1B)    | 102.80(18) | C(9B)-N(4B)-C(10B)   | 125.1(2)   |
| C(9B)-N(4B)-C(14B)   | 120.5(2)   | C(10B)-N(4B)-C(14B)  | 114.0(2)   |
| O(5B)-N(5B)-O(6B)    | 123.1(2)   | O(5B)-N(5B)-C(5B)    | 119.4(2)   |
| O(6B)-N(5B)-C(5B)    | 117.4(2)   | N(1B)-C(1B)-C(6B)    | 114.2(2)   |
| N(1B)-C(1B)-C(2B)    | 124.5(2)   | C(6B)-C(1B)-C(2B)    | 121.2(2)   |
| C(3B)-C(2B)-C(1B)    | 118.8(2)   | C(3B)-C(2B)-C(8B)    | 122.5(2)   |
| C(1B)-C(2B)-C(8B)    | 118.6(2)   | C(2B)-C(3B)-C(4B)    | 121.0(2)   |
| C(2B)-C(3B)-C(9B)    | 121.0(2)   | C(4B)-C(3B)-C(9B)    | 118.0(2)   |
| C(5B)-C(4B)-C(3B)    | 120.3(2)   | C(4B)-C(5B)-C(6B)    | 122.0(2)   |
| C(4B)-C(5B)-N(5B)    | 117.4(2)   | C(6B)-C(5B)-N(5B)    | 120.5(2)   |
| C(7B)-C(6B)-C(1B)    | 103.1(2)   | C(7B)-C(6B)-C(5B)    | 140.4(2)   |
| C(1B)-C(6B)-C(5B)    | 116.5(2)   | N(2B)-C(7B)-O(1B)    | 115.7(2)   |
| N(2B)-C(7B)-C(6B)    | 135.4(2)   | O(1B)-C(7B)-C(6B)    | 108.9(2)   |
| N(3B)-C(8B)-C(2B)    | 177.5(3)   | O(2B)-C(9B)-N(4B)    | 125.5(2)   |
| O(2B)-C(9B)-C(3B)    | 119.0(2)   | N(4B)-C(9B)-C(3B)    | 115.5(2)   |
| N(4B)-C(10B)-C(11B)  | 109.3(2)   | C(12B)-C(11B)-C(10B) | 111.5(2)   |
| O(3B)-C(12B)-O(4B)   | 106.28(19) | O(3B)-C(12B)-C(11B)  | 111.8(2)   |

|                      |           |                      |            |
|----------------------|-----------|----------------------|------------|
| O(4B)-C(12B)-C(11B)  | 108.2(2)  | O(3B)-C(12B)-C(13B)  | 109.4(2)   |
| O(4B)-C(12B)-C(13B)  | 110.2(2)  | C(11B)-C(12B)-C(13B) | 110.8(2)   |
| C(12B)-C(13B)-C(14B) | 111.8(2)  | N(4B)-C(14B)-C(13B)  | 110.1(2)   |
| O(3B)-C(15B)-C(17B)  | 108.6(2)  | O(3B)-C(15B)-C(16B)  | 101.39(18) |
| C(17B)-C(15B)-C(16B) | 116.7(2)  | O(4B)-C(16B)-C(15B)  | 102.3(2)   |
| C(7A)-N(2A)-H(2AA)   | 117.7(18) | C(7A)-N(2A)-H(2AB)   | 120(2)     |
| H(2AA)-N(2A)-H(2AB)  | 122(3)    | C(5A)-C(4A)-H(4A)    | 119.9      |
| C(3A)-C(4A)-H(4A)    | 119.9     | N(4A)-C(10A)-H(10A)  | 109.5      |
| C(11A)-C(10A)-H(10A) | 109.5     | N(4A)-C(10A)-H(10B)  | 109.5      |
| C(11A)-C(10A)-H(10B) | 109.5     | H(10A)-C(10A)-H(10B) | 108.1      |
| C(10A)-C(11A)-H(11A) | 109.7     | C(12A)-C(11A)-H(11A) | 109.7      |
| C(10A)-C(11A)-H(11B) | 109.7     | C(12A)-C(11A)-H(11B) | 109.7      |
| H(11A)-C(11A)-H(11B) | 108.2     | C(12A)-C(13A)-H(13A) | 109.4      |
| C(14A)-C(13A)-H(13A) | 109.4     | C(12A)-C(13A)-H(13B) | 109.4      |
| C(14A)-C(13A)-H(13B) | 109.4     | H(13A)-C(13A)-H(13B) | 108.0      |
| N(4A)-C(14A)-H(14A)  | 109.5     | C(13A)-C(14A)-H(14A) | 109.5      |
| N(4A)-C(14A)-H(14B)  | 109.5     | C(13A)-C(14A)-H(14B) | 109.5      |
| H(14A)-C(14A)-H(14B) | 108.1     | O(3A)-C(15A)-H(15A)  | 109.2      |
| C(17A)-C(15A)-H(15A) | 109.2     | C(16A)-C(15A)-H(15A) | 109.2      |
| O(4A)-C(16A)-H(16A)  | 110.6     | C(15A)-C(16A)-H(16A) | 110.6      |
| O(4A)-C(16A)-H(16B)  | 110.6     | C(15A)-C(16A)-H(16B) | 110.6      |
| H(16A)-C(16A)-H(16B) | 108.7     | C(15A)-C(17A)-H(17D) | 109.5      |
| C(15A)-C(17A)-H(17E) | 109.5     | H(17D)-C(17A)-H(17E) | 109.5      |
| C(15A)-C(17A)-H(17F) | 109.5     | H(17D)-C(17A)-H(17F) | 109.5      |
| H(17E)-C(17A)-H(17F) | 109.5     | C(7B)-N(2B)-H(2BA)   | 114(2)     |
| C(7B)-N(2B)-H(2BB)   | 121(2)    | H(2BA)-N(2B)-H(2BB)  | 125(3)     |
| C(5B)-C(4B)-H(4B)    | 119.9     | C(3B)-C(4B)-H(4B)    | 119.9      |
| N(4B)-C(10B)-H(10C)  | 109.8     | C(11B)-C(10B)-H(10C) | 109.8      |
| N(4B)-C(10B)-H(10D)  | 109.8     | C(11B)-C(10B)-H(10D) | 109.8      |
| H(10C)-C(10B)-H(10D) | 108.3     | C(12B)-C(11B)-H(11C) | 109.3      |
| C(10B)-C(11B)-H(11C) | 109.3     | C(12B)-C(11B)-H(11D) | 109.3      |
| C(10B)-C(11B)-H(11D) | 109.3     | H(11C)-C(11B)-H(11D) | 108.0      |
| C(12B)-C(13B)-H(13C) | 109.3     | C(14B)-C(13B)-H(13C) | 109.3      |
| C(12B)-C(13B)-H(13D) | 109.3     | C(14B)-C(13B)-H(13D) | 109.3      |
| H(13C)-C(13B)-H(13D) | 107.9     | N(4B)-C(14B)-H(14C)  | 109.6      |
| C(13B)-C(14B)-H(14C) | 109.6     | N(4B)-C(14B)-H(14D)  | 109.6      |
| C(13B)-C(14B)-H(14D) | 109.6     | H(14C)-C(14B)-H(14D) | 108.1      |
| O(3B)-C(15B)-H(15B)  | 109.9     | C(17B)-C(15B)-H(15B) | 109.9      |
| C(16B)-C(15B)-H(15B) | 109.9     | O(4B)-C(16B)-H(16C)  | 111.3      |
| C(15B)-C(16B)-H(16C) | 111.3     | O(4B)-C(16B)-H(16D)  | 111.3      |
| C(15B)-C(16B)-H(16D) | 111.3     | H(16C)-C(16B)-H(16D) | 109.2      |
| C(15B)-C(17B)-H(17A) | 109.5     | C(15B)-C(17B)-H(17B) | 109.5      |
| H(17A)-C(17B)-H(17B) | 109.5     | C(15B)-C(17B)-H(17C) | 109.5      |
| H(17A)-C(17B)-H(17C) | 109.5     | H(17B)-C(17B)-H(17C) | 109.5      |

Symmetry transformations used to generate equivalent atoms:

Table 6. Torsion angles [°] for nd1236.

| atom-atom-atom-atom         | angle       | atom-atom-atom-atom         | angle      |
|-----------------------------|-------------|-----------------------------|------------|
| C(7A)-O(1A)-N(1A)-C(1A)     | -0.1(2)     | O(1A)-N(1A)-C(1A)-C(6A)     | 0.7(2)     |
| O(1A)-N(1A)-C(1A)-C(2A)     | -177.4(2)   | N(1A)-C(1A)-C(2A)-C(3A)     | -178.7(2)  |
| C(6A)-C(1A)-C(2A)-C(3A)     | 3.4(3)      | N(1A)-C(1A)-C(2A)-C(8A)     | 2.8(4)     |
| C(6A)-C(1A)-C(2A)-C(8A)     | -175.2(2)   | C(8A)-C(2A)-C(3A)-C(4A)     | 178.9(2)   |
| C(1A)-C(2A)-C(3A)-C(4A)     | 0.5(3)      | C(8A)-C(2A)-C(3A)-C(9A)     | -1.4(4)    |
| C(1A)-C(2A)-C(3A)-C(9A)     | -179.8(2)   | C(2A)-C(3A)-C(4A)-C(5A)     | -3.1(3)    |
| C(9A)-C(3A)-C(4A)-C(5A)     | 177.2(2)    | C(3A)-C(4A)-C(5A)-C(6A)     | 1.8(4)     |
| C(3A)-C(4A)-C(5A)-N(5A)     | -173.97(18) | O(5A)-N(5A)-C(5A)-C(4A)     | -19.5(3)   |
| O(6A)-N(5A)-C(5A)-C(4A)     | 158.7(2)    | O(5A)-N(5A)-C(5A)-C(6A)     | 164.7(2)   |
| O(6A)-N(5A)-C(5A)-C(6A)     | -17.1(3)    | C(4A)-C(5A)-C(6A)-C(7A)     | 179.4(3)   |
| N(5A)-C(5A)-C(6A)-C(7A)     | -5.0(4)     | C(4A)-C(5A)-C(6A)-C(1A)     | 2.0(3)     |
| N(5A)-C(5A)-C(6A)-C(1A)     | 177.53(18)  | N(1A)-C(1A)-C(6A)-C(5A)     | 177.3(2)   |
| C(2A)-C(1A)-C(6A)-C(5A)     | -4.5(3)     | N(1A)-C(1A)-C(6A)-C(7A)     | -1.0(3)    |
| C(2A)-C(1A)-C(6A)-C(7A)     | 177.1(2)    | N(1A)-O(1A)-C(7A)-N(2A)     | 179.72(19) |
| N(1A)-O(1A)-C(7A)-C(6A)     | -0.6(2)     | C(5A)-C(6A)-C(7A)-N(2A)     | 2.8(5)     |
| C(1A)-C(6A)-C(7A)-N(2A)     | -179.5(3)   | C(5A)-C(6A)-C(7A)-O(1A)     | -176.8(3)  |
| C(1A)-C(6A)-C(7A)-O(1A)     | 0.9(2)      | C(3A)-C(2A)-C(8A)-N(3A)     | -150(6)    |
| C(1A)-C(2A)-C(8A)-N(3A)     | 28(6)       | C(14A)-N(4A)-C(9A)-O(2A)    | 2.4(4)     |
| C(10A)-N(4A)-C(9A)-O(2A)    | -170.1(2)   | C(14A)-N(4A)-C(9A)-C(3A)    | -178.5(2)  |
| C(10A)-N(4A)-C(9A)-C(3A)    | 8.9(3)      | C(2A)-C(3A)-C(9A)-O(2A)     | -99.4(3)   |
| C(4A)-C(3A)-C(9A)-O(2A)     | 80.3(3)     | C(2A)-C(3A)-C(9A)-N(4A)     | 81.5(3)    |
| C(4A)-C(3A)-C(9A)-N(4A)     | -98.8(3)    | C(9A)-N(4A)-C(10A)-C(11A)   | -129.4(2)  |
| C(14A)-N(4A)-C(10A)-C(11A)  | 57.5(3)     | N(4A)-C(10A)-C(11A)-C(12A)  | -56.7(3)   |
| C(15A)-O(3A)-C(12A)-O(4A)   | 33.5(3)     | C(15A)-O(3A)-C(12A)-C(11A)  | 151.0(2)   |
| C(15A)-O(3A)-C(12A)-C(13A)  | -86.5(2)    | C(16A)-O(4A)-C(12A)-O(3A)   | -28.1(4)   |
| C(16A)-O(4A)-C(12A)-C(11A)  | -146.0(3)   | C(16A)-O(4A)-C(12A)-C(13A)  | 92.0(3)    |
| C(10A)-C(11A)-C(12A)-O(3A)  | 179.10(19)  | C(10A)-C(11A)-C(12A)-O(4A)  | -65.9(3)   |
| C(10A)-C(11A)-C(12A)-C(13A) | 56.3(3)     | O(3A)-C(12A)-C(13A)-C(14A)  | -177.1(2)  |
| O(4A)-C(12A)-C(13A)-C(14A)  | 66.3(3)     | C(11A)-C(12A)-C(13A)-C(14A) | -54.9(3)   |
| C(9A)-N(4A)-C(14A)-C(13A)   | 131.2(2)    | C(10A)-N(4A)-C(14A)-C(13A)  | -55.5(3)   |
| C(12A)-C(13A)-C(14A)-N(4A)  | 53.6(3)     | C(12A)-O(3A)-C(15A)-C(17A)  | -149.9(3)  |
| C(12A)-O(3A)-C(15A)-C(16A)  | -25.9(3)    | C(12A)-O(4A)-C(16A)-C(15A)  | 11.6(4)    |
| O(3A)-C(15A)-C(16A)-O(4A)   | 8.7(4)      | C(17A)-C(15A)-C(16A)-O(4A)  | 128.5(3)   |
| C(7B)-O(1B)-N(1B)-C(1B)     | -0.1(2)     | O(1B)-N(1B)-C(1B)-C(6B)     | -0.5(2)    |
| O(1B)-N(1B)-C(1B)-C(2B)     | 178.6(2)    | N(1B)-C(1B)-C(2B)-C(3B)     | 179.6(2)   |
| C(6B)-C(1B)-C(2B)-C(3B)     | -1.4(3)     | N(1B)-C(1B)-C(2B)-C(8B)     | -2.3(4)    |
| C(6B)-C(1B)-C(2B)-C(8B)     | 176.7(2)    | C(1B)-C(2B)-C(3B)-C(4B)     | -1.8(3)    |
| C(8B)-C(2B)-C(3B)-C(4B)     | -179.8(2)   | C(1B)-C(2B)-C(3B)-C(9B)     | 178.0(2)   |
| C(8B)-C(2B)-C(3B)-C(9B)     | 0.0(4)      | C(2B)-C(3B)-C(4B)-C(5B)     | 3.5(3)     |
| C(9B)-C(3B)-C(4B)-C(5B)     | -176.3(2)   | C(3B)-C(4B)-C(5B)-C(6B)     | -2.0(3)    |
| C(3B)-C(4B)-C(5B)-N(5B)     | 175.06(19)  | O(5B)-N(5B)-C(5B)-C(4B)     | 18.7(3)    |
| O(6B)-N(5B)-C(5B)-C(4B)     | -159.0(2)   | O(5B)-N(5B)-C(5B)-C(6B)     | -164.2(2)  |

|                             |             |                             |             |
|-----------------------------|-------------|-----------------------------|-------------|
| O(6B)-N(5B)-C(5B)-C(6B)     | 18.1(3)     | N(1B)-C(1B)-C(6B)-C(7B)     | 0.8(3)      |
| C(2B)-C(1B)-C(6B)-C(7B)     | -178.3(2)   | N(1B)-C(1B)-C(6B)-C(5B)     | -178.07(19) |
| C(2B)-C(1B)-C(6B)-C(5B)     | 2.9(3)      | C(4B)-C(5B)-C(6B)-C(7B)     | -179.4(3)   |
| N(5B)-C(5B)-C(6B)-C(7B)     | 3.7(4)      | C(4B)-C(5B)-C(6B)-C(1B)     | -1.2(3)     |
| N(5B)-C(5B)-C(6B)-C(1B)     | -178.11(18) | N(1B)-O(1B)-C(7B)-N(2B)     | -178.99(19) |
| N(1B)-O(1B)-C(7B)-C(6B)     | 0.6(2)      | C(1B)-C(6B)-C(7B)-N(2B)     | 178.7(3)    |
| C(5B)-C(6B)-C(7B)-N(2B)     | -3.0(5)     | C(1B)-C(6B)-C(7B)-O(1B)     | -0.8(2)     |
| C(5B)-C(6B)-C(7B)-O(1B)     | 177.6(3)    | C(3B)-C(2B)-C(8B)-N(3B)     | 170(7)      |
| C(1B)-C(2B)-C(8B)-N(3B)     | -8(7)       | C(10B)-N(4B)-C(9B)-O(2B)    | 168.9(2)    |
| C(14B)-N(4B)-C(9B)-O(2B)    | -3.3(3)     | C(10B)-N(4B)-C(9B)-C(3B)    | -12.1(3)    |
| C(14B)-N(4B)-C(9B)-C(3B)    | 175.7(2)    | C(2B)-C(3B)-C(9B)-O(2B)     | 95.8(3)     |
| C(4B)-C(3B)-C(9B)-O(2B)     | -84.4(3)    | C(2B)-C(3B)-C(9B)-N(4B)     | -83.2(3)    |
| C(4B)-C(3B)-C(9B)-N(4B)     | 96.6(2)     | C(9B)-N(4B)-C(10B)-C(11B)   | 129.3(2)    |
| C(14B)-N(4B)-C(10B)-C(11B)  | -58.0(3)    | N(4B)-C(10B)-C(11B)-C(12B)  | 56.4(3)     |
| C(15B)-O(3B)-C(12B)-O(4B)   | 5.8(3)      | C(15B)-O(3B)-C(12B)-C(11B)  | -112.1(2)   |
| C(15B)-O(3B)-C(12B)-C(13B)  | 124.8(2)    | C(16B)-O(4B)-C(12B)-O(3B)   | 19.3(3)     |
| C(16B)-O(4B)-C(12B)-C(11B)  | 139.5(2)    | C(16B)-O(4B)-C(12B)-C(13B)  | -99.2(3)    |
| C(10B)-C(11B)-C(12B)-O(3B)  | -177.17(19) | C(10B)-C(11B)-C(12B)-O(4B)  | 66.1(3)     |
| C(10B)-C(11B)-C(12B)-C(13B) | -54.9(3)    | O(3B)-C(12B)-C(13B)-C(14B)  | 176.8(2)    |
| O(4B)-C(12B)-C(13B)-C(14B)  | -66.7(3)    | C(11B)-C(12B)-C(13B)-C(14B) | 53.1(3)     |
| C(9B)-N(4B)-C(14B)-C(13B)   | -130.5(2)   | C(10B)-N(4B)-C(14B)-C(13B)  | 56.5(3)     |
| C(12B)-C(13B)-C(14B)-N(4B)  | -52.9(3)    | C(12B)-O(3B)-C(15B)-C(17B)  | -150.3(2)   |
| C(12B)-O(3B)-C(15B)-C(16B)  | -26.8(3)    | C(12B)-O(4B)-C(16B)-C(15B)  | -35.4(3)    |
| O(3B)-C(15B)-C(16B)-O(4B)   | 37.6(2)     | C(17B)-C(15B)-C(16B)-O(4B)  | 155.3(2)    |

Symmetry transformations used to generate equivalent atoms:



Table 7. Hydrogen bonds for nd1236 [ $\text{\AA}$  and  $^\circ$ ].

| D-H...A                | d(D-H)  | d(H...A) | d(D...A) | $\angle(\text{DHA})$ |
|------------------------|---------|----------|----------|----------------------|
| N(2A)-H(2AA)...O(2A)#1 | 0.89(3) | 2.06(3)  | 2.946(3) | 173(2)               |
| N(2A)-H(2AB)...O(6A)   | 0.93(3) | 2.10(3)  | 2.803(3) | 131(3)               |
| N(2A)-H(2AB)...O(6B)#2 | 0.93(3) | 2.18(3)  | 3.020(3) | 151(3)               |
| N(2B)-H(2BA)...O(2B)#3 | 0.88(4) | 2.07(4)  | 2.932(3) | 169(3)               |
| N(2B)-H(2BB)...O(6A)#4 | 0.78(3) | 2.29(3)  | 3.013(3) | 155(3)               |
| N(2B)-H(2BB)...O(6B)   | 0.78(3) | 2.22(3)  | 2.798(3) | 131(3)               |

Symmetry transformations used to generate equivalent atoms:

#1  $x, y-1, z$  #2  $-x+1, y-1/2, -z$  #3  $x, y+1, z$  #4  $-x+1, y+1/2, -z$

X-ray Structure Report  
for compound **31 (nd1237)**

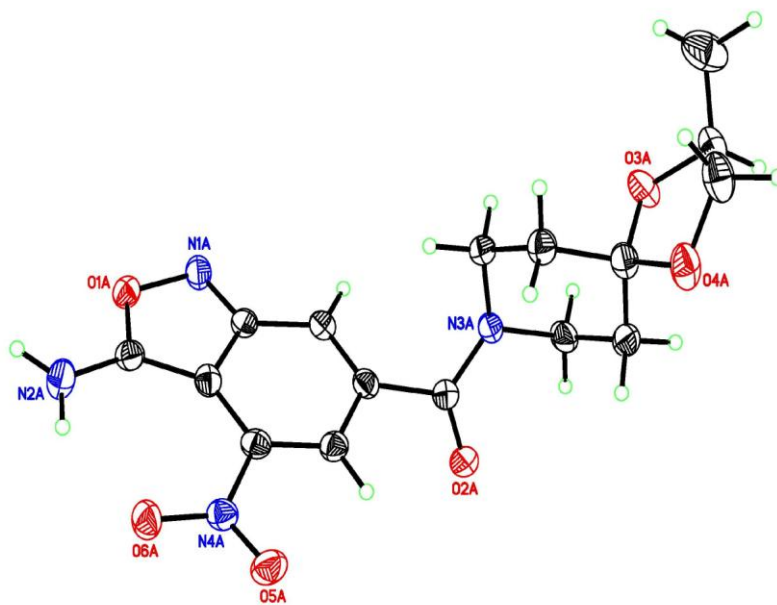

## DISCUSSION

The compound crystallizes as dark red blocks. There are two crystallographically independent molecules of the compound in the asymmetric unit of the primitive, acentric, monoclinic space group  $P2_1$ . The correct enantiomer of the compound and enantiomorph of the space group were determined by comparison of the known handedness of the molecule and by comparison of intensities of Friedel pairs of reflections. The measurement of intensity differences agreed with the known configuration. The Flack  $x$  parameter is 0.06(17) and the Hooft  $y$  parameter, based on Bayesian statistical analysis of the reflections is 0.10(5). Values of zero are indicative of the correct configuration.

The structure of the molecules is analogous to compound **32**. Although there are two crystallographically independent molecules in the asymmetric unit, they are chemically identical. The connectivity and variation of bond distances is also similar. The tautomer is depicted in the appended ChemDraw Figure. Examination of the structure reveals one difference compared with ND1236. The benzo-isoxazol ring systems of the two independent molecules form a  $\pi$ - $\pi$  stacking interaction (ring – ring distance = 3.31Å). presumably lack of steric interference allows this favorable interaction.

The amino hydrogens (N2) on both molecules were located from a difference Fourier map and included in refined positions. As with the cyano analog, one hydrogen forms an intramolecular H-bond with a nitro oxygen. The remaining amino hydrogen forms an H-bond to the carbonyl oxygen, O2, of an adjacent molecule related by translation along the  $b$ -axis. Unlike the cyano adduct, this H-bond is to the same molecular species, and not to the other molecule in the asymmetric unit. The resulting motif is a pair of one-dimensional chains of each molecule that are oriented parallel to the  $b$ -axis with additional stacking from the weak  $\pi$ - $\pi$  interactions (see Figures).

The bond distances and angles within the molecules exhibit the same variations as observed with the cyano-analog.

## CRYSTAL SUMMARY

Crystal data for  $C_{16}H_{18}N_4O_6$ ;  $M_r = 362.34$ ; Monoclinic; space group  $P2_1$ ;  $a = 9.66900(10)$  Å;  $b = 8.06660(10)$  Å;  $c = 20.7830(3)$  Å;  $\alpha = 90^\circ$ ;  $\beta = 90.6040(10)^\circ$ ;  $\gamma = 90^\circ$ ;  $V = 1620.90(4)$  Å<sup>3</sup>;  $Z = 4$ ;  $T = 120(2)$  K;  $\lambda(\text{Cu-K}\alpha) = 1.54184$  Å;  $\mu(\text{Cu-K}\alpha) = 0.979$  mm<sup>-1</sup>;  $d_{\text{calc}} = 1.485$  g.cm<sup>-3</sup>; 25993 reflections collected; 5760 unique ( $R_{\text{int}} = 0.0221$ ); giving  $R_1 = 0.0393$ ,  $wR_2 = 0.1100$  for 5559 data with  $[I > 2\sigma(I)]$  and  $R_1 = 0.0406$ ,  $wR_2 = 0.1116$  for all 5760 data. Residual electron density ( $e^- \cdot \text{Å}^{-3}$ ) max/min: 0.384/-0.250.

An arbitrary sphere of data were collected on a dark red block-like crystal, having approximate dimensions of 0.08 × 0.08 × 0.06 mm, on a Bruker APEX-II diffractometer using a combination of  $\omega$ - and  $\phi$ -scans of 0.5°. Data were corrected for absorption and polarization effects and analyzed for space group determination. The structure was solved by direct methods and expanded routinely. The model was refined by full-matrix least-squares analysis of  $F^2$  against all reflections. All non-hydrogen atoms were refined with anisotropic thermal displacement

parameters. Unless otherwise noted, hydrogen atoms were included in calculated positions. Thermal parameters for the hydrogens were tied to the isotropic thermal parameter of the atom to which they are bonded ( $1.5 \times$  for methyl,  $1.2 \times$  for all others).

#### REFERENCES

Bruker AXS. (2008). *APEX-2*. Bruker-Nonius AXS, Madison, Wisconsin, USA.

G. M. Sheldrick, *Acta Cryst.*, **2008**, *A64*, 112.

R. W. W. Hooft, L. H. Straver & A. L. Spek, *J. Appl. Cryst.*, **2008**, *41*, 96.

H. D. Flack, *Acta Cryst.*, **1983**, *A39*, 876.

Table 1. Crystal data and structure refinement for nd1237.

|                                   |                                                                                                                                                                    |
|-----------------------------------|--------------------------------------------------------------------------------------------------------------------------------------------------------------------|
| Identification code               | nd1237                                                                                                                                                             |
| Empirical formula                 | C <sub>16</sub> H <sub>18</sub> N <sub>4</sub> O <sub>6</sub>                                                                                                      |
| Formula weight                    | 362.34                                                                                                                                                             |
| Temperature                       | 120(2) K                                                                                                                                                           |
| Wavelength                        | 1.54184 Å                                                                                                                                                          |
| Crystal system                    | Monoclinic                                                                                                                                                         |
| Space group                       | P2 <sub>1</sub>                                                                                                                                                    |
| Unit cell dimensions              | $a = 9.66900(10) \text{ \AA}$ $\alpha = 90^\circ$<br>$b = 8.06660(10) \text{ \AA}$ $\beta = 90.6040(10)^\circ$<br>$c = 20.7830(3) \text{ \AA}$ $\gamma = 90^\circ$ |
| Volume                            | 1620.90(4) Å <sup>3</sup>                                                                                                                                          |
| Z                                 | 4                                                                                                                                                                  |
| Density (calculated)              | 1.485 g.cm <sup>-3</sup>                                                                                                                                           |
| Absorption coefficient (μ)        | 0.979 mm <sup>-1</sup>                                                                                                                                             |
| F(000)                            | 760                                                                                                                                                                |
| Crystal color, habit              | dark red, block                                                                                                                                                    |
| Crystal size                      | 0.08 × 0.08 × 0.06 mm <sup>3</sup>                                                                                                                                 |
| θ range for data collection       | 2.13 to 71.36°                                                                                                                                                     |
| Index ranges                      | -11 ≤ h ≤ 11, -9 ≤ k ≤ 9, -25 ≤ l ≤ 22                                                                                                                             |
| Reflections collected             | 25993                                                                                                                                                              |
| Independent reflections           | 5760 [R <sub>int</sub> = 0.0221]                                                                                                                                   |
| Completeness to θ = 71.36°        | 96.9 %                                                                                                                                                             |
| Absorption correction             | Numerical                                                                                                                                                          |
| Max. and min. transmission        | 0.9907 and 0.9247                                                                                                                                                  |
| Refinement method                 | Full-matrix least-squares on F <sup>2</sup>                                                                                                                        |
| Data / restraints / parameters    | 5760 / 1 / 487                                                                                                                                                     |
| Goodness-of-fit on F <sup>2</sup> | 1.051                                                                                                                                                              |
| Final R indices [I > 2σ(I)]       | R <sub>1</sub> = 0.0393, wR <sub>2</sub> = 0.1100                                                                                                                  |
| R indices (all data)              | R <sub>1</sub> = 0.0406, wR <sub>2</sub> = 0.1116                                                                                                                  |
| Absolute structure parameter      | 0.06(17)                                                                                                                                                           |
| Largest diff. peak and hole       | 0.384 and -0.250 e <sup>-</sup> .Å <sup>-3</sup>                                                                                                                   |

Table 2. Atomic coordinates and equivalent isotropic displacement parameters ( $\text{\AA}^2$ ) for nd1237.  $U(\text{eq})$  is defined as one third of the trace of the orthogonalized  $U_{ij}$  tensor.

|        | x           | y          | z           | $U(\text{eq})$ |
|--------|-------------|------------|-------------|----------------|
| O(1A)  | 0.97602(15) | 0.5268(2)  | 0.76550(8)  | 0.029(1)       |
| O(2A)  | 0.29114(16) | 0.5648(2)  | 0.80606(9)  | 0.036(1)       |
| O(3A)  | 0.20879(19) | -0.0409(2) | 0.92124(8)  | 0.034(1)       |
| O(4A)  | 0.16671(18) | 0.1301(3)  | 1.00691(8)  | 0.037(1)       |
| O(5A)  | 0.63721(17) | 0.9346(2)  | 0.92257(8)  | 0.033(1)       |
| O(6A)  | 0.84021(16) | 0.9394(2)  | 0.88079(9)  | 0.035(1)       |
| N(1A)  | 0.86081(19) | 0.4216(3)  | 0.75275(10) | 0.029(1)       |
| N(2A)  | 1.0425(2)   | 0.7537(3)  | 0.82162(10) | 0.032(1)       |
| N(3A)  | 0.34478(18) | 0.3042(3)  | 0.83781(9)  | 0.027(1)       |
| N(4A)  | 0.72547(19) | 0.8760(3)  | 0.88854(9)  | 0.025(1)       |
| C(1A)  | 0.7601(2)   | 0.4898(3)  | 0.78547(10) | 0.024(1)       |
| C(2A)  | 0.6223(2)   | 0.4267(3)  | 0.78907(11) | 0.026(1)       |
| C(3A)  | 0.5277(2)   | 0.5122(3)  | 0.82438(10) | 0.024(1)       |
| C(4A)  | 0.5633(2)   | 0.6636(3)  | 0.85619(10) | 0.025(1)       |
| C(5A)  | 0.6958(2)   | 0.7213(3)  | 0.85441(10) | 0.024(1)       |
| C(6A)  | 0.7996(2)   | 0.6375(3)  | 0.81934(10) | 0.024(1)       |
| C(7A)  | 0.9410(2)   | 0.6521(3)  | 0.80473(10) | 0.026(1)       |
| C(8A)  | 0.3772(2)   | 0.4627(3)  | 0.82342(10) | 0.026(1)       |
| C(9A)  | 0.1994(2)   | 0.2503(3)  | 0.83338(12) | 0.031(1)       |
| C(10A) | 0.1364(2)   | 0.2398(3)  | 0.89993(13) | 0.032(1)       |
| C(11A) | 0.2213(2)   | 0.1268(3)  | 0.94347(11) | 0.029(1)       |
| C(12A) | 0.3737(2)   | 0.1766(3)  | 0.94379(11) | 0.029(1)       |
| C(13A) | 0.4303(2)   | 0.1906(3)  | 0.87595(10) | 0.026(1)       |
| C(14A) | 0.1519(2)   | -0.1386(3) | 0.97223(11) | 0.032(1)       |
| C(15A) | 0.1784(3)   | -0.0347(4) | 1.03042(12) | 0.038(1)       |
| C(16A) | 0.2189(4)   | -0.3053(5) | 0.97198(14) | 0.052(1)       |
| O(1B)  | 0.50694(15) | 0.9211(2)  | 0.73712(8)  | 0.027(1)       |
| O(2B)  | 1.19168(16) | 0.8864(2)  | 0.69740(9)  | 0.035(1)       |
| O(3B)  | 1.26680(16) | 1.4994(2)  | 0.58171(8)  | 0.030(1)       |
| O(4B)  | 1.31372(18) | 1.3331(3)  | 0.49589(9)  | 0.038(1)       |
| O(5B)  | 0.84579(16) | 0.5173(3)  | 0.57779(8)  | 0.033(1)       |
| O(6B)  | 0.63786(18) | 0.5228(3)  | 0.61325(9)  | 0.042(1)       |
| N(1B)  | 0.62214(18) | 1.0261(3)  | 0.74966(9)  | 0.028(1)       |
| N(2B)  | 0.44125(19) | 0.6911(3)  | 0.68293(10) | 0.029(1)       |
| N(3B)  | 1.13701(18) | 1.1455(3)  | 0.66329(9)  | 0.026(1)       |
| N(4B)  | 0.75521(19) | 0.5790(3)  | 0.60944(9)  | 0.028(1)       |
| C(1B)  | 0.7226(2)   | 0.9581(3)  | 0.71585(10) | 0.023(1)       |
| C(2B)  | 0.8599(2)   | 1.0216(3)  | 0.71263(10) | 0.025(1)       |
| C(3B)  | 0.9554(2)   | 0.9378(3)  | 0.67790(11) | 0.025(1)       |
| C(4B)  | 0.9193(2)   | 0.7883(3)  | 0.64454(10) | 0.025(1)       |
| C(5B)  | 0.7865(2)   | 0.7302(3)  | 0.64634(10) | 0.024(1)       |

|        |           |           |             |           |
|--------|-----------|-----------|-------------|-----------|
| C(6B)  | 0.6824(2) | 0.8123(3) | 0.68187(10) | 0.022(1)  |
| C(7B)  | 0.5420(2) | 0.7959(3) | 0.69744(10) | 0.025(1)  |
| C(8B)  | 1.1055(2) | 0.9884(3) | 0.67891(10) | 0.025(1)  |
| C(9B)  | 1.2799(2) | 1.2046(3) | 0.66965(11) | 0.029(1)  |
| C(10B) | 1.3460(2) | 1.2248(3) | 0.60380(12) | 0.030(1)  |
| C(11B) | 1.2588(2) | 1.3330(3) | 0.55959(11) | 0.026(1)  |
| C(12B) | 1.1090(2) | 1.2730(3) | 0.55696(11) | 0.027(1)  |
| C(13B) | 1.0489(2) | 1.2569(3) | 0.62438(10) | 0.026(1)  |
| C(14B) | 1.2579(3) | 1.6020(3) | 0.52438(11) | 0.036(1)  |
| C(15B) | 1.3403(3) | 1.5016(4) | 0.47750(14) | 0.047(1)  |
| C(16B) | 1.3156(3) | 1.7706(4) | 0.53673(14) | 0.043(1)  |
| H(2NA) | 1.129(4)  | 0.733(6)  | 0.8100(19)  | 0.073(12) |
| H(2NB) | 1.016(2)  | 0.839(4)  | 0.8446(11)  | 0.018(6)  |
| H(2A)  | 0.5970    | 0.3273    | 0.7674      | 0.031     |
| H(4A)  | 0.4947    | 0.7241    | 0.8786      | 0.030     |
| H(9A)  | 0.1943    | 0.1403    | 0.8123      | 0.038     |
| H(9B)  | 0.1461    | 0.3299    | 0.8067      | 0.038     |
| H(10A) | 0.0407    | 0.1968    | 0.8963      | 0.039     |
| H(10B) | 0.1322    | 0.3521    | 0.9191      | 0.039     |
| H(12A) | 0.3844    | 0.2845    | 0.9660      | 0.035     |
| H(12B) | 0.4280    | 0.0930    | 0.9681      | 0.035     |
| H(13A) | 0.5267    | 0.2319    | 0.8778      | 0.032     |
| H(13B) | 0.4308    | 0.0799    | 0.8554      | 0.032     |
| H(14A) | 0.0499    | -0.1513   | 0.9653      | 0.039     |
| H(15A) | 0.1090    | -0.0568   | 1.0640      | 0.046     |
| H(15B) | 0.2719    | -0.0557   | 1.0484      | 0.046     |
| H(16A) | 0.2059    | -0.3568   | 0.9296      | 0.078     |
| H(16B) | 0.1767    | -0.3754   | 1.0049      | 0.078     |
| H(16C) | 0.3180    | -0.2933   | 0.9812      | 0.078     |
| H(2NC) | 0.356(3)  | 0.711(4)  | 0.6948(13)  | 0.035(7)  |
| H(2ND) | 0.456(3)  | 0.613(4)  | 0.6525(13)  | 0.031(7)  |
| H(2B)  | 0.8843    | 1.1211    | 0.7344      | 0.030     |
| H(4B)  | 0.9876    | 0.7296    | 0.6212      | 0.030     |
| H(9C)  | 1.3344    | 1.1246    | 0.6956      | 0.034     |
| H(9D)  | 1.2809    | 1.3124    | 0.6924      | 0.034     |
| H(10C) | 1.4388    | 1.2751    | 0.6092      | 0.036     |
| H(10D) | 1.3578    | 1.1143    | 0.5839      | 0.036     |
| H(12C) | 1.1048    | 1.1640    | 0.5351      | 0.032     |
| H(12D) | 1.0525    | 1.3522    | 0.5315      | 0.032     |
| H(13C) | 1.0444    | 1.3674    | 0.6450      | 0.031     |
| H(13D) | 0.9538    | 1.2116    | 0.6216      | 0.031     |
| H(14B) | 1.1596    | 1.6106    | 0.5093      | 0.043     |
| H(15C) | 1.3090    | 1.5226    | 0.4327      | 0.056     |
| H(15D) | 1.4401    | 1.5278    | 0.4812      | 0.056     |
| H(16D) | 1.2684    | 1.8207    | 0.5734      | 0.065     |
| H(16E) | 1.3015    | 1.8401    | 0.4985      | 0.065     |

H(16F)

1.4148

1.7620

0.5463

0.065



Table 3. Anisotropic displacement parameters ( $\text{\AA}^2$ ) for nd1237.

The anisotropic displacement factor exponent takes the form:

$$-2\pi^2[h^2a^{*2}U_{11} + \dots + 2hka^*b^*U_{12}]$$

|        | U <sub>11</sub> | U <sub>22</sub> | U <sub>33</sub> | U <sub>23</sub> | U <sub>13</sub> | U <sub>12</sub> |
|--------|-----------------|-----------------|-----------------|-----------------|-----------------|-----------------|
| O(1A)  | 0.0239(7)       | 0.0291(9)       | 0.0325(8)       | -0.0027(7)      | 0.0045(6)       | 0.0013(6)       |
| O(2A)  | 0.0242(7)       | 0.0286(10)      | 0.0542(11)      | 0.0056(8)       | 0.0008(7)       | 0.0024(6)       |
| O(3A)  | 0.0493(10)      | 0.0244(10)      | 0.0274(8)       | -0.0008(7)      | 0.0089(7)       | -0.0080(7)      |
| O(4A)  | 0.0435(9)       | 0.0376(11)      | 0.0311(9)       | -0.0118(8)      | 0.0155(7)       | -0.0124(8)      |
| O(5A)  | 0.0318(8)       | 0.0311(10)      | 0.0366(9)       | -0.0078(8)      | 0.0028(7)       | 0.0055(7)       |
| O(6A)  | 0.0273(8)       | 0.0318(9)       | 0.0460(10)      | -0.0122(8)      | 0.0032(7)       | -0.0065(7)      |
| N(1A)  | 0.0251(9)       | 0.0298(11)      | 0.0327(10)      | -0.0011(8)      | 0.0037(7)       | -0.0044(8)      |
| N(2A)  | 0.0233(9)       | 0.0391(13)      | 0.0346(11)      | -0.0059(10)     | 0.0019(8)       | -0.0028(8)      |
| N(3A)  | 0.0219(8)       | 0.0251(11)      | 0.0332(10)      | 0.0069(8)       | 0.0009(7)       | -0.0017(7)      |
| N(4A)  | 0.0261(9)       | 0.0233(10)      | 0.0259(9)       | -0.0027(8)      | -0.0031(7)      | 0.0008(7)       |
| C(1A)  | 0.0237(9)       | 0.0237(12)      | 0.0250(10)      | 0.0038(9)       | 0.0009(8)       | 0.0006(8)       |
| C(2A)  | 0.0257(10)      | 0.0222(12)      | 0.0308(11)      | 0.0030(9)       | 0.0006(8)       | -0.0016(8)      |
| C(3A)  | 0.0245(10)      | 0.0226(12)      | 0.0259(10)      | 0.0051(9)       | 0.0001(8)       | -0.0019(8)      |
| C(4A)  | 0.0242(9)       | 0.0249(12)      | 0.0247(10)      | 0.0028(8)       | 0.0005(8)       | 0.0022(8)       |
| C(5A)  | 0.0273(10)      | 0.0225(12)      | 0.0235(10)      | 0.0037(9)       | -0.0024(8)      | 0.0018(8)       |
| C(6A)  | 0.0230(9)       | 0.0265(12)      | 0.0224(10)      | 0.0050(9)       | -0.0018(8)      | -0.0019(8)      |
| C(7A)  | 0.0256(10)      | 0.0248(12)      | 0.0269(10)      | 0.0009(9)       | 0.0000(8)       | 0.0018(9)       |
| C(8A)  | 0.0239(10)      | 0.0241(13)      | 0.0286(11)      | -0.0001(9)      | 0.0019(8)       | -0.0005(9)      |
| C(9A)  | 0.0248(10)      | 0.0253(13)      | 0.0438(13)      | 0.0046(10)      | -0.0048(9)      | -0.0055(9)      |
| C(10A) | 0.0231(9)       | 0.0240(12)      | 0.0504(14)      | -0.0063(10)     | 0.0042(9)       | -0.0042(8)      |
| C(11A) | 0.0327(11)      | 0.0249(12)      | 0.0289(11)      | -0.0076(10)     | 0.0091(9)       | -0.0061(9)      |
| C(12A) | 0.0286(10)      | 0.0310(13)      | 0.0276(11)      | 0.0006(10)      | 0.0034(9)       | -0.0014(9)      |
| C(13A) | 0.0230(9)       | 0.0257(12)      | 0.0307(11)      | 0.0055(9)       | 0.0030(8)       | 0.0019(8)       |
| C(14A) | 0.0317(11)      | 0.0343(12)      | 0.0315(11)      | 0.0079(9)       | 0.0004(9)       | -0.0097(10)     |
| C(15A) | 0.0426(13)      | 0.0437(16)      | 0.0290(12)      | -0.0059(11)     | 0.0046(10)      | -0.0174(11)     |
| C(16A) | 0.077(2)        | 0.0425(18)      | 0.0373(14)      | 0.0080(12)      | -0.0014(14)     | 0.0039(15)      |
| O(1B)  | 0.0216(7)       | 0.0261(9)       | 0.0324(8)       | -0.0045(7)      | 0.0032(6)       | 0.0005(6)       |
| O(2B)  | 0.0236(7)       | 0.0257(10)      | 0.0564(11)      | 0.0085(8)       | 0.0025(7)       | 0.0015(6)       |
| O(3B)  | 0.0346(8)       | 0.0201(9)       | 0.0359(8)       | -0.0002(7)      | 0.0008(7)       | -0.0046(6)      |
| O(4B)  | 0.0376(9)       | 0.0400(11)      | 0.0363(9)       | -0.0005(8)      | 0.0153(7)       | -0.0070(8)      |
| O(5B)  | 0.0315(8)       | 0.0322(10)      | 0.0356(8)       | -0.0092(8)      | 0.0016(7)       | 0.0050(7)       |
| O(6B)  | 0.0315(8)       | 0.0379(11)      | 0.0572(11)      | -0.0205(9)      | 0.0106(8)       | -0.0114(8)      |
| N(1B)  | 0.0221(8)       | 0.0250(11)      | 0.0365(10)      | -0.0044(9)      | 0.0056(7)       | -0.0019(7)      |
| N(2B)  | 0.0217(9)       | 0.0314(12)      | 0.0333(10)      | -0.0029(9)      | -0.0003(8)      | -0.0017(8)      |
| N(3B)  | 0.0196(8)       | 0.0264(11)      | 0.0313(9)       | 0.0032(8)       | 0.0007(7)       | -0.0032(7)      |
| N(4B)  | 0.0263(9)       | 0.0276(11)      | 0.0297(10)      | -0.0013(8)      | 0.0015(8)       | 0.0017(8)       |
| C(1B)  | 0.0245(9)       | 0.0218(12)      | 0.0242(10)      | 0.0024(9)       | 0.0026(8)       | 0.0000(9)       |
| C(2B)  | 0.0256(10)      | 0.0211(11)      | 0.0279(11)      | 0.0013(9)       | 0.0034(8)       | -0.0023(9)      |
| C(3B)  | 0.0233(9)       | 0.0231(12)      | 0.0279(10)      | 0.0049(9)       | 0.0012(8)       | -0.0021(9)      |
| C(4B)  | 0.0253(10)      | 0.0232(12)      | 0.0263(10)      | -0.0001(9)      | 0.0041(8)       | 0.0029(9)       |

|        |            |            |            |             |             |             |
|--------|------------|------------|------------|-------------|-------------|-------------|
| C(5B)  | 0.0273(10) | 0.0212(11) | 0.0223(10) | 0.0023(9)   | -0.0004(8)  | -0.0018(8)  |
| C(6B)  | 0.0238(10) | 0.0201(11) | 0.0222(9)  | 0.0045(8)   | -0.0001(8)  | 0.0004(8)   |
| C(7B)  | 0.0269(10) | 0.0265(13) | 0.0219(10) | 0.0037(9)   | -0.0003(8)  | 0.0045(9)   |
| C(8B)  | 0.0224(9)  | 0.0256(12) | 0.0265(10) | 0.0004(9)   | 0.0052(8)   | 0.0016(9)   |
| C(9B)  | 0.0230(10) | 0.0278(13) | 0.0350(12) | 0.0038(10)  | -0.0030(9)  | -0.0040(9)  |
| C(10B) | 0.0215(9)  | 0.0253(12) | 0.0437(13) | -0.0007(10) | 0.0041(9)   | -0.0029(9)  |
| C(11B) | 0.0252(10) | 0.0244(12) | 0.0293(11) | -0.0017(9)  | 0.0057(9)   | -0.0025(9)  |
| C(12B) | 0.0237(10) | 0.0279(12) | 0.0286(11) | -0.0012(9)  | 0.0013(8)   | -0.0042(9)  |
| C(13B) | 0.0212(9)  | 0.0282(12) | 0.0282(11) | 0.0046(9)   | 0.0031(8)   | 0.0013(8)   |
| C(14B) | 0.0355(12) | 0.0360(13) | 0.0355(12) | 0.0091(10)  | -0.0016(10) | -0.0042(10) |
| C(15B) | 0.0552(16) | 0.0420(17) | 0.0436(14) | 0.0080(13)  | 0.0156(13)  | -0.0093(13) |
| C(16B) | 0.0587(16) | 0.0281(14) | 0.0422(14) | 0.0048(11)  | -0.0008(12) | -0.0044(12) |

Table 4. Bond lengths [ $\text{\AA}$ ] for nd1237.

| atom-atom     | distance | atom-atom     | distance |
|---------------|----------|---------------|----------|
| O(1A)-C(7A)   | 1.345(3) | O(1A)-N(1A)   | 1.423(3) |
| O(2A)-C(8A)   | 1.223(3) | O(3A)-C(11A)  | 1.434(3) |
| O(3A)-C(14A)  | 1.435(3) | O(4A)-C(15A)  | 1.420(4) |
| O(4A)-C(11A)  | 1.426(3) | O(5A)-N(4A)   | 1.210(3) |
| O(6A)-N(4A)   | 1.234(3) | N(1A)-C(1A)   | 1.314(3) |
| N(2A)-C(7A)   | 1.322(3) | N(3A)-C(8A)   | 1.351(3) |
| N(3A)-C(13A)  | 1.462(3) | N(3A)-C(9A)   | 1.473(3) |
| N(4A)-C(5A)   | 1.462(3) | C(1A)-C(2A)   | 1.429(3) |
| C(1A)-C(6A)   | 1.434(3) | C(2A)-C(3A)   | 1.365(3) |
| C(3A)-C(4A)   | 1.429(3) | C(3A)-C(8A)   | 1.509(3) |
| C(4A)-C(5A)   | 1.364(3) | C(5A)-C(6A)   | 1.418(3) |
| C(6A)-C(7A)   | 1.409(3) | C(9A)-C(10A)  | 1.520(4) |
| C(10A)-C(11A) | 1.520(4) | C(11A)-C(12A) | 1.526(3) |
| C(12A)-C(13A) | 1.522(3) | C(14A)-C(15A) | 1.491(3) |
| C(14A)-C(16A) | 1.493(4) | O(1B)-C(7B)   | 1.349(3) |
| O(1B)-N(1B)   | 1.421(2) | O(2B)-C(8B)   | 1.230(3) |
| O(3B)-C(11B)  | 1.420(3) | O(3B)-C(14B)  | 1.453(3) |
| O(4B)-C(11B)  | 1.431(3) | O(4B)-C(15B)  | 1.436(4) |
| O(5B)-N(4B)   | 1.208(3) | O(6B)-N(4B)   | 1.225(3) |
| N(1B)-C(1B)   | 1.324(3) | N(2B)-C(7B)   | 1.323(3) |
| N(3B)-C(8B)   | 1.344(3) | N(3B)-C(9B)   | 1.466(3) |
| N(3B)-C(13B)  | 1.474(3) | N(4B)-C(5B)   | 1.471(3) |
| C(1B)-C(6B)   | 1.424(3) | C(1B)-C(2B)   | 1.425(3) |
| C(2B)-C(3B)   | 1.358(3) | C(3B)-C(4B)   | 1.432(3) |
| C(3B)-C(8B)   | 1.507(3) | C(4B)-C(5B)   | 1.368(3) |
| C(5B)-C(6B)   | 1.418(3) | C(6B)-C(7B)   | 1.405(3) |
| C(9B)-C(10B)  | 1.525(3) | C(10B)-C(11B) | 1.517(3) |
| C(11B)-C(12B) | 1.528(3) | C(12B)-C(13B) | 1.528(3) |
| C(14B)-C(16B) | 1.491(4) | C(14B)-C(15B) | 1.502(4) |
| N(2A)-H(2NA)  | 0.89(4)  | N(2A)-H(2NB)  | 0.88(3)  |
| C(2A)-H(2A)   | 0.9500   | C(4A)-H(4A)   | 0.9500   |
| C(9A)-H(9A)   | 0.9900   | C(9A)-H(9B)   | 0.9900   |
| C(10A)-H(10A) | 0.9900   | C(10A)-H(10B) | 0.9900   |
| C(12A)-H(12A) | 0.9900   | C(12A)-H(12B) | 0.9900   |
| C(13A)-H(13A) | 0.9900   | C(13A)-H(13B) | 0.9900   |
| C(14A)-H(14A) | 1.0000   | C(15A)-H(15A) | 0.9900   |
| C(15A)-H(15B) | 0.9900   | C(16A)-H(16A) | 0.9800   |
| C(16A)-H(16B) | 0.9800   | C(16A)-H(16C) | 0.9800   |
| N(2B)-H(2NC)  | 0.88(3)  | N(2B)-H(2ND)  | 0.90(3)  |
| C(2B)-H(2B)   | 0.9500   | C(4B)-H(4B)   | 0.9500   |
| C(9B)-H(9C)   | 0.9900   | C(9B)-H(9D)   | 0.9900   |
| C(10B)-H(10C) | 0.9900   | C(10B)-H(10D) | 0.9900   |

|               |        |               |        |
|---------------|--------|---------------|--------|
| C(12B)-H(12C) | 0.9900 | C(12B)-H(12D) | 0.9900 |
| C(13B)-H(13C) | 0.9900 | C(13B)-H(13D) | 0.9900 |
| C(14B)-H(14B) | 1.0000 | C(15B)-H(15C) | 0.9900 |
| C(15B)-H(15D) | 0.9900 | C(16B)-H(16D) | 0.9800 |
| C(16B)-H(16E) | 0.9800 | C(16B)-H(16F) | 0.9800 |

Symmetry transformations used to generate equivalent atoms:

Table 5. Bond angles [°] for nd1237.

| atom-atom-atom       | angle      | atom-atom-atom       | angle      |
|----------------------|------------|----------------------|------------|
| C(7A)-O(1A)-N(1A)    | 111.09(16) | C(11A)-O(3A)-C(14A)  | 108.20(18) |
| C(15A)-O(4A)-C(11A)  | 105.8(2)   | C(1A)-N(1A)-O(1A)    | 103.72(19) |
| C(8A)-N(3A)-C(13A)   | 125.59(19) | C(8A)-N(3A)-C(9A)    | 119.27(19) |
| C(13A)-N(3A)-C(9A)   | 112.51(18) | O(5A)-N(4A)-O(6A)    | 123.7(2)   |
| O(5A)-N(4A)-C(5A)    | 118.75(19) | O(6A)-N(4A)-C(5A)    | 117.55(19) |
| N(1A)-C(1A)-C(2A)    | 125.1(2)   | N(1A)-C(1A)-C(6A)    | 113.98(19) |
| C(2A)-C(1A)-C(6A)    | 121.0(2)   | C(3A)-C(2A)-C(1A)    | 118.5(2)   |
| C(2A)-C(3A)-C(4A)    | 121.4(2)   | C(2A)-C(3A)-C(8A)    | 120.7(2)   |
| C(4A)-C(3A)-C(8A)    | 117.4(2)   | C(5A)-C(4A)-C(3A)    | 120.1(2)   |
| C(4A)-C(5A)-C(6A)    | 121.4(2)   | C(4A)-C(5A)-N(4A)    | 117.2(2)   |
| C(6A)-C(5A)-N(4A)    | 121.3(2)   | C(7A)-C(6A)-C(5A)    | 139.9(2)   |
| C(7A)-C(6A)-C(1A)    | 102.6(2)   | C(5A)-C(6A)-C(1A)    | 117.50(19) |
| N(2A)-C(7A)-O(1A)    | 115.9(2)   | N(2A)-C(7A)-C(6A)    | 135.5(2)   |
| O(1A)-C(7A)-C(6A)    | 108.6(2)   | O(2A)-C(8A)-N(3A)    | 123.0(2)   |
| O(2A)-C(8A)-C(3A)    | 118.6(2)   | N(3A)-C(8A)-C(3A)    | 118.3(2)   |
| N(3A)-C(9A)-C(10A)   | 110.54(19) | C(9A)-C(10A)-C(11A)  | 110.84(19) |
| O(4A)-C(11A)-O(3A)   | 106.53(19) | O(4A)-C(11A)-C(10A)  | 109.6(2)   |
| O(3A)-C(11A)-C(10A)  | 109.31(19) | O(4A)-C(11A)-C(12A)  | 110.97(19) |
| O(3A)-C(11A)-C(12A)  | 109.1(2)   | C(10A)-C(11A)-C(12A) | 111.1(2)   |
| C(13A)-C(12A)-C(11A) | 111.85(19) | N(3A)-C(13A)-C(12A)  | 109.96(18) |
| O(3A)-C(14A)-C(15A)  | 103.1(2)   | O(3A)-C(14A)-C(16A)  | 108.8(2)   |
| C(15A)-C(14A)-C(16A) | 116.0(2)   | O(4A)-C(15A)-C(14A)  | 103.58(19) |
| C(7B)-O(1B)-N(1B)    | 110.89(16) | C(11B)-O(3B)-C(14B)  | 105.69(18) |
| C(11B)-O(4B)-C(15B)  | 108.4(2)   | C(1B)-N(1B)-O(1B)    | 103.53(18) |
| C(8B)-N(3B)-C(9B)    | 120.05(19) | C(8B)-N(3B)-C(13B)   | 125.14(19) |
| C(9B)-N(3B)-C(13B)   | 112.98(18) | O(5B)-N(4B)-O(6B)    | 124.1(2)   |
| O(5B)-N(4B)-C(5B)    | 118.65(19) | O(6B)-N(4B)-C(5B)    | 117.29(19) |
| N(1B)-C(1B)-C(6B)    | 114.02(19) | N(1B)-C(1B)-C(2B)    | 124.4(2)   |
| C(6B)-C(1B)-C(2B)    | 121.6(2)   | C(3B)-C(2B)-C(1B)    | 119.0(2)   |
| C(2B)-C(3B)-C(4B)    | 120.9(2)   | C(2B)-C(3B)-C(8B)    | 121.2(2)   |
| C(4B)-C(3B)-C(8B)    | 117.6(2)   | C(5B)-C(4B)-C(3B)    | 119.9(2)   |
| C(4B)-C(5B)-C(6B)    | 121.7(2)   | C(4B)-C(5B)-N(4B)    | 117.2(2)   |
| C(6B)-C(5B)-N(4B)    | 121.03(19) | C(7B)-C(6B)-C(5B)    | 140.2(2)   |
| C(7B)-C(6B)-C(1B)    | 102.87(19) | C(5B)-C(6B)-C(1B)    | 116.87(19) |
| N(2B)-C(7B)-O(1B)    | 115.40(19) | N(2B)-C(7B)-C(6B)    | 135.9(2)   |
| O(1B)-C(7B)-C(6B)    | 108.7(2)   | O(2B)-C(8B)-N(3B)    | 123.5(2)   |
| O(2B)-C(8B)-C(3B)    | 118.2(2)   | N(3B)-C(8B)-C(3B)    | 118.22(19) |
| N(3B)-C(9B)-C(10B)   | 110.95(18) | C(11B)-C(10B)-C(9B)  | 111.67(18) |
| O(3B)-C(11B)-O(4B)   | 106.23(19) | O(3B)-C(11B)-C(10B)  | 108.63(18) |
| O(4B)-C(11B)-C(10B)  | 110.56(18) | O(3B)-C(11B)-C(12B)  | 111.06(19) |
| O(4B)-C(11B)-C(12B)  | 109.14(18) | C(10B)-C(11B)-C(12B) | 111.1(2)   |
| C(11B)-C(12B)-C(13B) | 111.33(17) | N(3B)-C(13B)-C(12B)  | 109.36(17) |

|                      |           |                      |           |
|----------------------|-----------|----------------------|-----------|
| O(3B)-C(14B)-C(16B)  | 111.1(2)  | O(3B)-C(14B)-C(15B)  | 101.4(2)  |
| C(16B)-C(14B)-C(15B) | 113.8(2)  | O(4B)-C(15B)-C(14B)  | 103.9(2)  |
| C(7A)-N(2A)-H(2NA)   | 120(3)    | C(7A)-N(2A)-H(2NB)   | 114.5(16) |
| H(2NA)-N(2A)-H(2NB)  | 125(3)    | C(3A)-C(2A)-H(2A)    | 120.7     |
| C(1A)-C(2A)-H(2A)    | 120.7     | C(5A)-C(4A)-H(4A)    | 120.0     |
| C(3A)-C(4A)-H(4A)    | 120.0     | N(3A)-C(9A)-H(9A)    | 109.5     |
| C(10A)-C(9A)-H(9A)   | 109.5     | N(3A)-C(9A)-H(9B)    | 109.5     |
| C(10A)-C(9A)-H(9B)   | 109.5     | H(9A)-C(9A)-H(9B)    | 108.1     |
| C(9A)-C(10A)-H(10A)  | 109.5     | C(11A)-C(10A)-H(10A) | 109.5     |
| C(9A)-C(10A)-H(10B)  | 109.5     | C(11A)-C(10A)-H(10B) | 109.5     |
| H(10A)-C(10A)-H(10B) | 108.1     | C(13A)-C(12A)-H(12A) | 109.2     |
| C(11A)-C(12A)-H(12A) | 109.2     | C(13A)-C(12A)-H(12B) | 109.2     |
| C(11A)-C(12A)-H(12B) | 109.2     | H(12A)-C(12A)-H(12B) | 107.9     |
| N(3A)-C(13A)-H(13A)  | 109.7     | C(12A)-C(13A)-H(13A) | 109.7     |
| N(3A)-C(13A)-H(13B)  | 109.7     | C(12A)-C(13A)-H(13B) | 109.7     |
| H(13A)-C(13A)-H(13B) | 108.2     | O(3A)-C(14A)-H(14A)  | 109.6     |
| C(15A)-C(14A)-H(14A) | 109.6     | C(16A)-C(14A)-H(14A) | 109.6     |
| O(4A)-C(15A)-H(15A)  | 111.0     | C(14A)-C(15A)-H(15A) | 111.0     |
| O(4A)-C(15A)-H(15B)  | 111.0     | C(14A)-C(15A)-H(15B) | 111.0     |
| H(15A)-C(15A)-H(15B) | 109.0     | C(14A)-C(16A)-H(16A) | 109.5     |
| C(14A)-C(16A)-H(16B) | 109.5     | H(16A)-C(16A)-H(16B) | 109.5     |
| C(14A)-C(16A)-H(16C) | 109.5     | H(16A)-C(16A)-H(16C) | 109.5     |
| H(16B)-C(16A)-H(16C) | 109.5     | C(7B)-N(2B)-H(2NC)   | 121(2)    |
| C(7B)-N(2B)-H(2ND)   | 118.9(18) | H(2NC)-N(2B)-H(2ND)  | 119(3)    |
| C(3B)-C(2B)-H(2B)    | 120.5     | C(1B)-C(2B)-H(2B)    | 120.5     |
| C(5B)-C(4B)-H(4B)    | 120.0     | C(3B)-C(4B)-H(4B)    | 120.0     |
| N(3B)-C(9B)-H(9C)    | 109.5     | C(10B)-C(9B)-H(9C)   | 109.5     |
| N(3B)-C(9B)-H(9D)    | 109.5     | C(10B)-C(9B)-H(9D)   | 109.5     |
| H(9C)-C(9B)-H(9D)    | 108.0     | C(11B)-C(10B)-H(10C) | 109.3     |
| C(9B)-C(10B)-H(10C)  | 109.3     | C(11B)-C(10B)-H(10D) | 109.3     |
| C(9B)-C(10B)-H(10D)  | 109.3     | H(10C)-C(10B)-H(10D) | 107.9     |
| C(11B)-C(12B)-H(12C) | 109.4     | C(13B)-C(12B)-H(12C) | 109.4     |
| C(11B)-C(12B)-H(12D) | 109.4     | C(13B)-C(12B)-H(12D) | 109.4     |
| H(12C)-C(12B)-H(12D) | 108.0     | N(3B)-C(13B)-H(13C)  | 109.8     |
| C(12B)-C(13B)-H(13C) | 109.8     | N(3B)-C(13B)-H(13D)  | 109.8     |
| C(12B)-C(13B)-H(13D) | 109.8     | H(13C)-C(13B)-H(13D) | 108.2     |
| O(3B)-C(14B)-H(14B)  | 110.1     | C(16B)-C(14B)-H(14B) | 110.1     |
| C(15B)-C(14B)-H(14B) | 110.1     | O(4B)-C(15B)-H(15C)  | 111.0     |
| C(14B)-C(15B)-H(15C) | 111.0     | O(4B)-C(15B)-H(15D)  | 111.0     |
| C(14B)-C(15B)-H(15D) | 111.0     | H(15C)-C(15B)-H(15D) | 109.0     |
| C(14B)-C(16B)-H(16D) | 109.5     | C(14B)-C(16B)-H(16E) | 109.5     |
| H(16D)-C(16B)-H(16E) | 109.5     | C(14B)-C(16B)-H(16F) | 109.5     |
| H(16D)-C(16B)-H(16F) | 109.5     | H(16E)-C(16B)-H(16F) | 109.5     |

Symmetry transformations used to generate equivalent atoms:

Table 6. Torsion angles [°] for nd1237.

| atom-atom-atom-atom        | angle       | atom-atom-atom-atom         | angle       |
|----------------------------|-------------|-----------------------------|-------------|
| C(7A)-O(1A)-N(1A)-C(1A)    | 0.0(2)      | O(1A)-N(1A)-C(1A)-C(2A)     | -178.6(2)   |
| O(1A)-N(1A)-C(1A)-C(6A)    | 0.8(2)      | N(1A)-C(1A)-C(2A)-C(3A)     | -179.1(2)   |
| C(6A)-C(1A)-C(2A)-C(3A)    | 1.5(3)      | C(1A)-C(2A)-C(3A)-C(4A)     | 1.3(3)      |
| C(1A)-C(2A)-C(3A)-C(8A)    | 172.7(2)    | C(2A)-C(3A)-C(4A)-C(5A)     | -3.3(3)     |
| C(8A)-C(3A)-C(4A)-C(5A)    | -175.0(2)   | C(3A)-C(4A)-C(5A)-C(6A)     | 2.5(3)      |
| C(3A)-C(4A)-C(5A)-N(4A)    | -179.37(19) | O(5A)-N(4A)-C(5A)-C(4A)     | 8.6(3)      |
| O(6A)-N(4A)-C(5A)-C(4A)    | -171.4(2)   | O(5A)-N(4A)-C(5A)-C(6A)     | -173.3(2)   |
| O(6A)-N(4A)-C(5A)-C(6A)    | 6.7(3)      | C(4A)-C(5A)-C(6A)-C(7A)     | 179.5(3)    |
| N(4A)-C(5A)-C(6A)-C(7A)    | 1.4(4)      | C(4A)-C(5A)-C(6A)-C(1A)     | 0.3(3)      |
| N(4A)-C(5A)-C(6A)-C(1A)    | -177.83(19) | N(1A)-C(1A)-C(6A)-C(7A)     | -1.2(2)     |
| C(2A)-C(1A)-C(6A)-C(7A)    | 178.2(2)    | N(1A)-C(1A)-C(6A)-C(5A)     | 178.30(19)  |
| C(2A)-C(1A)-C(6A)-C(5A)    | -2.3(3)     | N(1A)-O(1A)-C(7A)-N(2A)     | 177.4(2)    |
| N(1A)-O(1A)-C(7A)-C(6A)    | -0.8(2)     | C(5A)-C(6A)-C(7A)-N(2A)     | 4.1(5)      |
| C(1A)-C(6A)-C(7A)-N(2A)    | -176.6(3)   | C(5A)-C(6A)-C(7A)-O(1A)     | -178.2(3)   |
| C(1A)-C(6A)-C(7A)-O(1A)    | 1.2(2)      | C(13A)-N(3A)-C(8A)-O(2A)    | -160.9(2)   |
| C(9A)-N(3A)-C(8A)-O(2A)    | -0.7(3)     | C(13A)-N(3A)-C(8A)-C(3A)    | 23.5(3)     |
| C(9A)-N(3A)-C(8A)-C(3A)    | -176.3(2)   | C(2A)-C(3A)-C(8A)-O(2A)     | -121.6(3)   |
| C(4A)-C(3A)-C(8A)-O(2A)    | 50.2(3)     | C(2A)-C(3A)-C(8A)-N(3A)     | 54.2(3)     |
| C(4A)-C(3A)-C(8A)-N(3A)    | -134.1(2)   | C(8A)-N(3A)-C(9A)-C(10A)    | -102.6(2)   |
| C(13A)-N(3A)-C(9A)-C(10A)  | 60.0(3)     | N(3A)-C(9A)-C(10A)-C(11A)   | -55.6(3)    |
| C(15A)-O(4A)-C(11A)-O(3A)  | 23.9(2)     | C(15A)-O(4A)-C(11A)-C(10A)  | 142.1(2)    |
| C(15A)-O(4A)-C(11A)-C(12A) | -94.7(2)    | C(14A)-O(3A)-C(11A)-O(4A)   | -2.2(2)     |
| C(14A)-O(3A)-C(11A)-C(10A) | -120.65(19) | C(14A)-O(3A)-C(11A)-C(12A)  | 117.6(2)    |
| C(9A)-C(10A)-C(11A)-O(4A)  | 175.20(19)  | C(9A)-C(10A)-C(11A)-O(3A)   | -68.4(2)    |
| C(9A)-C(10A)-C(11A)-C(12A) | 52.2(3)     | O(4A)-C(11A)-C(12A)-C(13A)  | -174.3(2)   |
| O(3A)-C(11A)-C(12A)-C(13A) | 68.6(3)     | C(10A)-C(11A)-C(12A)-C(13A) | -52.1(3)    |
| C(8A)-N(3A)-C(13A)-C(12A)  | 102.3(2)    | C(9A)-N(3A)-C(13A)-C(12A)   | -59.0(3)    |
| C(11A)-C(12A)-C(13A)-N(3A) | 54.6(3)     | C(11A)-O(3A)-C(14A)-C(15A)  | -19.0(2)    |
| C(11A)-O(3A)-C(14A)-C(16A) | -142.7(2)   | C(11A)-O(4A)-C(15A)-C(14A)  | -35.4(2)    |
| O(3A)-C(14A)-C(15A)-O(4A)  | 33.3(2)     | C(16A)-C(14A)-C(15A)-O(4A)  | 152.1(2)    |
| C(7B)-O(1B)-N(1B)-C(1B)    | 0.4(2)      | O(1B)-N(1B)-C(1B)-C(6B)     | -0.7(2)     |
| O(1B)-N(1B)-C(1B)-C(2B)    | 179.3(2)    | N(1B)-C(1B)-C(2B)-C(3B)     | 177.9(2)    |
| C(6B)-C(1B)-C(2B)-C(3B)    | -2.1(3)     | C(1B)-C(2B)-C(3B)-C(4B)     | 0.4(3)      |
| C(1B)-C(2B)-C(3B)-C(8B)    | -173.0(2)   | C(2B)-C(3B)-C(4B)-C(5B)     | 1.4(3)      |
| C(8B)-C(3B)-C(4B)-C(5B)    | 175.0(2)    | C(3B)-C(4B)-C(5B)-C(6B)     | -1.5(3)     |
| C(3B)-C(4B)-C(5B)-N(4B)    | 178.13(19)  | O(5B)-N(4B)-C(5B)-C(4B)     | -2.6(3)     |
| O(6B)-N(4B)-C(5B)-C(4B)    | 176.9(2)    | O(5B)-N(4B)-C(5B)-C(6B)     | 177.0(2)    |
| O(6B)-N(4B)-C(5B)-C(6B)    | -3.5(3)     | C(4B)-C(5B)-C(6B)-C(7B)     | -178.3(3)   |
| N(4B)-C(5B)-C(6B)-C(7B)    | 2.1(4)      | C(4B)-C(5B)-C(6B)-C(1B)     | -0.2(3)     |
| N(4B)-C(5B)-C(6B)-C(1B)    | -179.77(19) | N(1B)-C(1B)-C(6B)-C(7B)     | 0.8(2)      |
| C(2B)-C(1B)-C(6B)-C(7B)    | -179.3(2)   | N(1B)-C(1B)-C(6B)-C(5B)     | -178.02(19) |

|                            |           |                             |             |
|----------------------------|-----------|-----------------------------|-------------|
| C(2B)-C(1B)-C(6B)-C(5B)    | 2.0(3)    | N(1B)-O(1B)-C(7B)-N(2B)     | 179.94(19)  |
| N(1B)-O(1B)-C(7B)-C(6B)    | 0.1(2)    | C(5B)-C(6B)-C(7B)-N(2B)     | -2.0(5)     |
| C(1B)-C(6B)-C(7B)-N(2B)    | 179.7(3)  | C(5B)-C(6B)-C(7B)-O(1B)     | 177.8(2)    |
| C(1B)-C(6B)-C(7B)-O(1B)    | -0.4(2)   | C(9B)-N(3B)-C(8B)-O(2B)     | -1.8(3)     |
| C(13B)-N(3B)-C(8B)-O(2B)   | 161.7(2)  | C(9B)-N(3B)-C(8B)-C(3B)     | 174.1(2)    |
| C(13B)-N(3B)-C(8B)-C(3B)   | -22.5(3)  | C(2B)-C(3B)-C(8B)-O(2B)     | 120.7(3)    |
| C(4B)-C(3B)-C(8B)-O(2B)    | -52.9(3)  | C(2B)-C(3B)-C(8B)-N(3B)     | -55.4(3)    |
| C(4B)-C(3B)-C(8B)-N(3B)    | 131.0(2)  | C(8B)-N(3B)-C(9B)-C(10B)    | 107.0(2)    |
| C(13B)-N(3B)-C(9B)-C(10B)  | -58.3(3)  | N(3B)-C(9B)-C(10B)-C(11B)   | 53.4(3)     |
| C(14B)-O(3B)-C(11B)-O(4B)  | 28.1(2)   | C(14B)-O(3B)-C(11B)-C(10B)  | 147.10(18)  |
| C(14B)-O(3B)-C(11B)-C(12B) | -90.4(2)  | C(15B)-O(4B)-C(11B)-O(3B)   | -6.2(3)     |
| C(15B)-O(4B)-C(11B)-C(10B) | -123.9(2) | C(15B)-O(4B)-C(11B)-C(12B)  | 113.6(2)    |
| C(9B)-C(10B)-C(11B)-O(3B)  | 71.1(2)   | C(9B)-C(10B)-C(11B)-O(4B)   | -172.73(18) |
| C(9B)-C(10B)-C(11B)-C(12B) | -51.4(3)  | O(3B)-C(11B)-C(12B)-C(13B)  | -67.9(2)    |
| O(4B)-C(11B)-C(12B)-C(13B) | 175.3(2)  | C(10B)-C(11B)-C(12B)-C(13B) | 53.2(3)     |
| C(8B)-N(3B)-C(13B)-C(12B)  | -105.0(2) | C(9B)-N(3B)-C(13B)-C(12B)   | 59.4(2)     |
| C(11B)-C(12B)-C(13B)-N(3B) | -56.1(3)  | C(11B)-O(3B)-C(14B)-C(16B)  | -159.1(2)   |
| C(11B)-O(3B)-C(14B)-C(15B) | -37.8(2)  | C(11B)-O(4B)-C(15B)-C(14B)  | -17.2(3)    |
| O(3B)-C(14B)-C(15B)-O(4B)  | 33.2(3)   | C(16B)-C(14B)-C(15B)-O(4B)  | 152.6(2)    |

Symmetry transformations used to generate equivalent atoms:



Table 7. Hydrogen bonds for nd1237 [ $\text{\AA}$  and  $^\circ$ ].

| D-H...A                | d(D-H)  | d(H...A) | d(D...A) | $\angle(\text{DHA})$ |
|------------------------|---------|----------|----------|----------------------|
| N(2A)-H(2NA)...O(2A)#1 | 0.89(4) | 2.07(5)  | 2.868(3) | 148(4)               |
| N(2A)-H(2NB)...O(3A)#2 | 0.88(3) | 2.62(2)  | 3.090(3) | 114.5(18)            |
| N(2A)-H(2NB)...O(6A)   | 0.88(3) | 2.04(3)  | 2.763(3) | 139(2)               |
| N(2B)-H(2NC)...O(2B)#3 | 0.88(3) | 2.13(3)  | 2.900(3) | 146(3)               |
| N(2B)-H(2ND)...O(3B)#4 | 0.90(3) | 2.51(3)  | 3.096(3) | 123(2)               |
| N(2B)-H(2ND)...O(6B)   | 0.90(3) | 2.08(3)  | 2.759(3) | 131(2)               |

Symmetry transformations used to generate equivalent atoms:

#1  $x+1,y,z$  #2  $x+1,y+1,z$  #3  $x-1,y,z$  #4  $x-1,y-1,z$
